# Supplementary material for: Interactions between soil- and dead wood-inhabiting fungal communities during the decay of Norway spruce logs
Source: PubMed Central journal article supplement — ISME J. 2017 Apr 21;11(9):1964–74. doi: 10.1038/ismej.2017.57 (PMC5563949; doi:10.1038/ismej.2017.57), 2017-04-21
Supplement: ismej201757x1.pdf [file ismej201757x1.pdf]

Supplementary, TableS1A  
 Taxonomy of OTUs  
 Normalized data, identification according to blast UNITEv57

| OtuID    | Taxonomy                                                                                                                                                                                      |
|----------|-----------------------------------------------------------------------------------------------------------------------------------------------------------------------------------------------|
| Otu00001 | k_Fungi(100);p_Basidiomycota(100);c_Agaricomycetes(100);o_Polyporales(100);f_Fomitopsidaceae(100);g_Fomitopsis(100);s_Fomitopsis_pinicola(100);                                               |
| Otu00002 | k_Fungi(100);p_Basidiomycota(100);c_Agaricomycetes(100);o_Atheliales(100);f_Atheliales(100);g_Piloderma(100);s_Piloderma_sphaerosporum(100);                                                  |
| Otu00003 | k_Fungi(100);p_Basidiomycota(100);c_Agaricomycetes(100);o_Russulales(100);f_Bondarzewiaceae(100);g_Heterobasidion(100);s_Heterobasidion_parviporum(100);                                      |
| Otu00004 | k_Fungi(100);p_Basidiomycota(100);c_Agaricomycetes(100);o_Polyporales(100);f_Fomitopsidaceae(100);g_Antrodia(100);s_Antrodia_serialis(100);                                                   |
| Otu00005 | k_Fungi(100);p_Basidiomycota(100);c_Agaricomycetes(100);o_Atheliales(100);f_Atheliales(100);g_Tylopora(100);s_Tylopora_sp(100);                                                               |
| Otu00006 | k_Fungi(100);p_Basidiomycota(100);c_Agaricomycetes(100);o_Hymenochaetales(100);f_Hymenochaetales(100);g_Phellopilus(100);s_Phellopilus_nigrolimitatus(100);                                   |
| Otu00007 | k_Fungi(100);p_Basidiomycota(100);c_Agaricomycetes(100);o_Boletales(100);f_Coniophoraceae(100);g_Coniophora(100);s_Coniophora_putana(100);                                                    |
| Otu00008 | k_Fungi(100);p_Basidiomycota(100);c_Agaricomycetes(100);o_Auriculariales(100);f_Auriculariales_family_Incertae_sedis(100);g_Basidiodendron(100);s_Basidiodendron_caesiocinereum(100);         |
| Otu00009 | k_Fungi(100);p_Zygomycota(100);c_Zygomycota_class_Incertae_sedis(100);o_Mortierellales(100);f_Mortierellaceae(100);g_Mortierella(100);s_Mortierella_humilis(100);                             |
| Otu00010 | k_Fungi(100);p_Basidiomycota(100);c_Agaricomycetes(100);o_Agaricales(100);f_unclassified_Agaricales(100);g_unclassified_Agaricales(100);s_Agaricales_sp(100);                                 |
| Otu00011 | k_Fungi(100);p_Basidiomycota(100);c_Agaricomycetes(100);o_Russulales(100);f_Russulaceae(100);g_Gymnomyces(100);s_Gymnomyces_monosporus(100);                                                  |
| Otu00012 | k_Fungi(100);p_Basidiomycota(100);c_Agaricomycetes(100);o_Hymenochaetales(100);f_Schizoporaceae(100);g_Hyphodontia(100);s_Hyphodontia_pallidula(100);                                         |
| Otu00013 | k_Fungi(100);p_Basidiomycota(100);c_Agaricomycetes(100);o_Agaricales(100);f_Pterulaceae(100);g_Aphanobasidium(100);s_Aphanobasidium_pseudotsugae(100);                                        |
| Otu00014 | k_Fungi(100);p_Basidiomycota(100);c_Agaricomycetes(100);o_Hymenochaetales(100);f_Hymenochaetales(100);g_Phellinus(100);s_Phellinus_viticola(100);                                             |
| Otu00015 | k_Fungi(100);p_Basidiomycota(100);c_Agaricomycetes(100);o_Auriculariales(100);f_Auriculariales_family_Incertae_sedis(100);g_Basidiodendron(100);s_Basidiodendron_caesiocinereum(100);         |
| Otu00016 | k_Fungi(100);p_Basidiomycota(100);c_Agaricomycetes(100);o_Polyporales(100);f_Meruliaceae(100);g_Hypochnicium(100);s_Hypochnicium_wakefieldiae(100);                                           |
| Otu00017 | k_Fungi(100);p_Basidiomycota(100);c_Agaricomycetes(100);o_Agaricales(100);f_Marasmiaceae(100);g_Connopus(100);s_Connopus_aceratus(100);                                                       |
| Otu00018 | k_Fungi(100);p_Zygomycota(100);c_Zygomycota_class_Incertae_sedis(100);o_Mortierellales(100);f_Mortierellaceae(100);g_Mortierella(100);s_Mortierella_sp_1_RB_2011(100);                        |
| Otu00019 | k_Fungi(100);p_Basidiomycota(100);c_Agaricomycetes(100);o_Hymenochaetales(100);f_Hymenochaetales(100);g_Phellopilus(100);s_Phellopilus_nigrolimitatus(100);                                   |
| Otu00020 | k_Fungi(100);p_Basidiomycota(100);c_Agaricomycetes(100);o_Hymenochaetales(100);f_Hymenochaetales(100);g_Phellinus(100);s_Phellinus_ferrugineovelutinus(100);                                  |
| Otu00021 | k_Fungi(100);p_Basidiomycota(100);c_Agaricomycetes(100);o_Boletales(100);f_Coniophoraceae(100);g_Coniophora(100);s_Coniophora_olivacea(100);                                                  |
| Otu00022 | k_Fungi(100);p_Basidiomycota(100);c_Agaricomycetes(100);o_Hymenochaetales(100);f_Hymenochaetales(100);g_Phellopilus(100);s_Phellopilus_nigrolimitatus(100);                                   |
| Otu00023 | k_Fungi(100);p_Basidiomycota(100);c_Agaricomycetes(100);o_Hymenochaetales(100);f_Schizoporaceae(100);g_Hyphodontia(98);s_Hyphodontia_crustosa(98);                                            |
| Otu00024 | k_Fungi(100);p_Basidiomycota(100);c_Agaricomycetes(100);o_Atheliales(100);f_Atheliales(100);g_Piloderma(100);s_Piloderma_fallax(100);                                                         |
| Otu00025 | k_Fungi(100);p_Basidiomycota(100);c_Agaricomycetes(100);o_Russulales(100);f_Russulaceae(100);g_Russula(100);s_Russula_decolorans(100);                                                        |
| Otu00026 | k_Fungi(100);p_Basidiomycota(100);c_Agaricomycetes(100);o_Russulales(100);f_Stereaceae(100);g_Stereum(100);s_Stereum_sanguinolentum(100);                                                     |
| Otu00027 | k_Fungi(100);p_Basidiomycota(100);c_Agaricomycetes(100);o_Hymenochaetales(100);f_Hymenochaetales_family_Incertae_sedis(100);g_Trichaptum(100);s_Trichaptum_sp(100);                           |
| Otu00028 | k_Fungi(100);p_Basidiomycota(100);c_Agaricomycetes(100);o_Russulales(100);f_Russulaceae(100);g_Lactarius(100);s_Lactarius_sp(99);                                                             |
| Otu00029 | k_Fungi(100);p_Basidiomycota(100);c_Agaricomycetes(100);o_Auriculariales(100);f_unclassified_Auriculariales(100);g_unclassified_Auriculariales_sp(100);                                       |
| Otu00030 | k_Fungi(100);p_Basidiomycota(100);c_Agaricomycetes(100);o_Auriculariales(100);f_Auriculariales_family_Incertae_sedis(100);g_Guepinia(98);s_Guepinia_helvelloides(98);                         |
| Otu00031 | k_Fungi(100);p_Zygomycota(100);c_Zygomycota_class_Incertae_sedis(100);o_Mortierellales(100);f_Mortierellaceae(100);g_Mortierella(100);s_Mortierella_sp(100);                                  |
| Otu00032 | k_Fungi(100);p_Zygomycota(100);c_Zygomycota_class_Incertae_sedis(100);o_Mortierellales(100);f_Mortierellaceae(100);g_Mortierella(100);s_Mortierella_sp_WD32A(100);                            |
| Otu00033 | k_Fungi(98);p_Basidiomycota(98);c_Atractiellomycetes(93);o_Atractiellales(93);f_unclassified_Atractiellales(93);g_unclassified_Atractiellales(93);s_Atractiellales_sp(93);                    |
| Otu00034 | k_Fungi(100);p_Ascmycota(100);c_Sordariomycetes(100);o_unclassified_Sordariomycetes(100);f_unclassified_Sordariomycetes(100);g_unclassified_Sordariomycetes_sp(100);                          |
| Otu00035 | k_Fungi(100);p_Ascmycota(100);c_Dothideomycetes(100);o_Dothideomycetes_order_Incertae_sedis(100);f_Myxotrichaceae(100);g_Oidiendron(100);s_Oidiendron_griseum(98);                            |
| Otu00036 | k_Fungi(100);p_Basidiomycota(100);c_Agaricomycetes(100);o_Agaricales(100);f_Marasmiaceae(100);g_Gymnopus(100);s_Gymnopus_androsaceus(100);                                                    |
| Otu00037 | k_Fungi(100);p_Basidiomycota(100);c_Agaricomycetes(100);o_Auriculariales(100);f_Auriculariales_family_Incertae_sedis(100);g_Exidia(100);s_Exidia_sp(100);                                     |
| Otu00038 | k_Fungi(99);p_Chytridiomycota(99);c_Chytridiomycetes(99);o_Chytridiales(99);f_Chytridiales_family_Incertae_sedis(99);g_Avachytrium(99);s_Avachytrium_platense(99);                            |
| Otu00039 | k_Fungi(100);p_Ascmycota(95);c_Saccharomycetes(95);o_Saccharomycetales(95);f_Dipodascaceae(95);g_Basidioascus(95);s_Basidioascus_magus(95);                                                   |
| Otu00040 | k_Fungi(61);p_Glomeromycota(59);c_Glomeromycetes(59);o_Archaeosporales(59);f_Archaeosporaceae(59);g_unclassified_Archaeosporaceae(59);s_Archaeosporaceae_sp(59);                              |
| Otu00041 | k_Fungi(100);p_Basidiomycota(100);c_Agaricomycetes(100);o_Cantharellales(100);f_Hydnceae(100);g_Sistotrema(100);s_Sistotrema_brinkmannii(100);                                                |
| Otu00042 | k_Fungi(100);p_Basidiomycota(100);c_Agaricomycetes(100);o_Agaricales(100);f_unclassified_Agaricales(100);g_unclassified_Agaricales(100);s_Agaricales_sp(100);                                 |
| Otu00043 | k_Fungi(100);p_Basidiomycota(100);c_unclassified_Basidiomycota(96);o_unclassified_Basidiomycota(96);f_unclassified_Basidiomycota(96);g_unclassified_Basidiomycota(96);s_Basidiomycota_sp(96); |
| Otu00044 | k_Fungi(100);p_Ascmycota(100);c_Dothideomycetes(100);o_Dothideomycetes_order_Incertae_sedis(100);f_Pseudeurotiaceae(100);g_unclassified_Pseudeurotiaceae(100);s_Pseudeurotiaceae_sp(100);     |
| Otu00045 | k_Fungi(100);p_Basidiomycota(100);c_Agaricomycetes(100);o_Russulales(100);f_Russulaceae(100);g_Lactarius(100);s_Lactarius_rufus(100);                                                         |
| Otu00046 | k_Fungi(100);p_Basidiomycota(100);c_Agaricomycetes(100);o_Russulales(100);f_Russulaceae(100);g_Russula(100);s_Russula_emetica(100);                                                           |
| Otu00047 | k_Fungi(100);p_Ascmycota(100);c_Sordariomycetes(100);o_Ophiostomatales(100);f_Ophiostomatales(100);g_Sporothrix(100);s_Sporothrix_sp_WRCF_AW9(100);                                           |
| Otu00048 | k_Fungi(100);p_Basidiomycota(100);c_Agaricomycetes(100);o_Russulales(100);f_Russulaceae(100);g_Russula(100);s_Russula_sp_H02(93);                                                             |
| Otu00049 | k_Fungi(100);p_Ascmycota(100);c_Saccharomycetes(100);o_Saccharomycetales(100);f_Saccharomycetales_family_Incertae_sedis(100);g_Candida(100);s_Candida_ergatensis(100);                        |
| Otu00050 | k_Fungi(100);p_Basidiomycota(100);c_Agaricomycetes(100);o_Atheliales(100);f_Atheliales(100);g_Tylopora(100);s_Tylopora_sp(100);                                                               |
| Otu00051 | k_Fungi(100);p_Basidiomycota(100);c_Agaricomycetes(100);o_Hymenochaetales(100);f_Schizoporaceae(100);g_Hyphodontia(100);s_Hyphodontia_abieticola(100);                                        |
| Otu00052 | k_Fungi(100);p_Basidiomycota(100);c_Agaricomycetes(100);o_Atheliales(100);f_Atheliales(100);g_Byssocorticium(100);s_Byssocorticium_sp(100);                                                   |
| Otu00053 | k_Fungi(100);p_Ascmycota(100);c_unclassified_Ascmycota(100);o_unclassified_Ascmycota(100);f_unclassified_Ascmycota(100);g_unclassified_Ascmycota(100);s_Ascmycota_sp(100);                    |
| Otu00054 | k_Fungi(100);p_Ascmycota(100);c_Dothideomycetes(100);o_Dothideomycetes_order_Incertae_sedis(100);f_Myxotrichaceae(100);g_Oidiendron(100);s_Oidiendron_pilicola(100);                          |
| Otu00055 | k_Fungi(100);p_Basidiomycota(100);c_Agaricomycetes(100);o_Polyporales(100);f_Meruliaceae(100);g_Hyphoderma(100);s_Hyphoderma_nudicephalum(88);                                                |
| Otu00056 | k_Fungi(100);p_Ascmycota(100);c_Leotiomycetes(100);o_Helotiales(100);f_unclassified_Helotiales(100);g_unclassified_Helotiales(100);s_Helotiales_sp(100);                                      |
| Otu00057 | k_Fungi(100);p_Basidiomycota(100);c_Agaricomycetes(100);o_Boletales(100);f_Coniophoraceae(100);g_Coniophora(100);s_Coniophora_arida(100);                                                     |
| Otu00058 | k_Fungi(100);p_Ascmycota(100);c_Dothideomycetes(100);o_Dothideomycetes_order_Incertae_sedis(100);f_Myxotrichaceae(100);g_Oidiendron(100);s_Oidiendron_sp_GK_2010(100);                        |
| Otu00059 | k_Fungi(100);p_Ascmycota(100);c_Leotiomycetes(100);o_Helotiales(100);f_unclassified_Helotiales(100);g_unclassified_Helotiales(100);s_Helotiales_sp(100);                                      |
| Otu00060 | k_Fungi(100);p_Basidiomycota(100);c_Agaricomycetes(100);o_Russulales(100);f_Russulaceae(100);g_Russula(100);s_Russula_consobrina(100);                                                        |
| Otu00061 | k_Fungi(100);p_Basidiomycota(100);c_Agaricomycetes(100);o_Thelephorales(100);f_Thelephoraceae(100);g_Tomentella(100);s_Tomentella_terrestris(100);                                            |
| Otu00062 | k_Fungi(97);p_Basidiomycota(97);c_Agaricomycetes(97);o_Agaricales(92);f_Hygrophoraceae(92);g_unclassified_Hygrophoraceae(92);s_Hygrophoraceae_sp(92);                                         |
| Otu00063 | k_Fungi(100);p_Basidiomycota(100);c_Agaricomycetes(100);o_Auriculariales(100);f_Auriculariales_family_Incertae_sedis(100);g_Basidiodendron(100);s_Basidiodendron_caesiocinereum(100);         |
| Otu00064 | k_Fungi(100);p_Zygomycota(100);c_Zygomycota_class_Incertae_sedis(100);o_Mortierellales(100);f_Mortierellaceae(100);g_Mortierella(100);s_Mortierella_minutissima(98);                          |
| Otu00065 | k_Fungi(100);p_Basidiomycota(100);c_Agaricomycetes(100);o_Agaricales(100);f_Mycenaceae(100);g_Xeromphalina(100);s_Xeromphalina_sp(100);                                                       |
| Otu00066 | k_Fungi(100);p_Ascmycota(100);c_Eurotiomycetes(100);o_Chaetothyriales(100);f_Herpotrichiellaceae(100);g_unclassified_Herpotrichiellaceae(100);s_Herpotrichiellaceae_sp(100);                  |

Supplementary, TableS1A  
 Taxonomy of OTUs  
 Normalized data, identification according to blast UNITEv57

|          |   |              |                           |                                        |                                               |                                                |                                         |                                         |
|----------|---|--------------|---------------------------|----------------------------------------|-----------------------------------------------|------------------------------------------------|-----------------------------------------|-----------------------------------------|
| Otu00067 | k | Fungi(100);p | Basidiomycota(100);c      | Agaricomycetes(100);o                  | Russulales(100);f                             | Russulaceae(100);g                             | Russula(100);s                          | Russula aquosa(100);                    |
| Otu00068 | k | Fungi(100);p | Basidiomycota(100);c      | Agaricomycetes(100);o                  | Cantharellales(100);f                         | Hydnaceae(94);g                                | Sistotrema(94);s                        | Sistotrema sp(94);                      |
| Otu00069 | k | Fungi(100);p | Basidiomycota(100);c      | Agaricomycetes(100);o                  | Atheliales(100);f                             | Atheliaceae(100);g                             | Athelia(100);s                          | Athelia decipiens(100);                 |
| Otu00070 | k | Fungi(100);p | Ascomycota(100);c         | Leotiomycetes(100);o                   | Helotiales(100);f                             | Vibrissaceae(100);g                            | Phialocephala(100);s                    | Phialocephala dimorphospora(88);        |
| Otu00071 | k | Fungi(100);p | Basidiomycota(100);c      | Microbotryomycetes(100);o              | Sporidiobolales(100);f                        | unclassified_Sporidiobolales(100);g            | unclassified_Sporidiobolales(100);s     | Sporidiobolales sp(100);                |
| Otu00072 | k | Fungi(100);p | Zygomycota(100);c         | Zygomycota class Incertae sedis(100);o | Mortierellales(100);f                         | Mortierellaceae(100);g                         | Mortierella(100);s                      | Mortierella sp WD32A(100);              |
| Otu00073 | k | Fungi(100);p | Basidiomycota(100);c      | Agaricomycetes(100);o                  | Agaricales(100);f                             | Mycenaceae(100);g                              | Mycena(100);s                           | Mycena stipitata(100);                  |
| Otu00074 | k | Fungi(100);p | Ascomycota(100);c         | Ascomycota class Incertae sedis(77);o  | Ascomycota order Incertae sedis(77);f         | Ascomycota family Incertae sedis(77);g         | Chalara(77);s                           | Chalara sp(77);                         |
| Otu00075 | k | Fungi(100);p | Basidiomycota(100);c      | Agaricomycetes(100);o                  | Russulales(100);f                             | Lachnocladiaceae(100);g                        | Scytinostroma(100);s                    | Scytinostroma odoratum(100);            |
| Otu00076 | k | Fungi(100);p | Ascomycota(100);c         | Sordariomycetes(100);o                 | Diaporthales(100);f                           | Valsaceae(100);g                               | Cytospora(100);s                        | Cytospora sp A11(100);                  |
| Otu00077 | k | Fungi(57);p  | Glomeromycota(56);c       | Glomeromycetes(56);o                   | Archaeosporales(56);f                         | Archaeosporaceae(56);g                         | unclassified_Archaeosporaceae(56);s     | Archaeosporaceae sp(56);                |
| Otu00078 | k | Fungi(100);p | Basidiomycota(100);c      | Agaricomycetes(100);o                  | Boletales(94);f                               | Boletaceae(94);g                               | unclassified_Boletaceae(94);s           | Boletaceae sp(94);                      |
| Otu00079 | k | Fungi(100);p | Ascomycota(100);c         | unclassified_Ascmycota(98);o           | unclassified_Ascmycota(98);f                  | unclassified_Ascmycota(98);g                   | unclassified_Ascmycota(98);s            | Ascomycota sp(98);                      |
| Otu00080 | k | Fungi(100);p | Basidiomycota(100);c      | Tremellomycetes(100);o                 | Filobasidiales(100);f                         | Filobasidiaceae(100);g                         | Cryptococcus(100);s                     | Cryptococcus terricola(100);            |
| Otu00081 | k | Fungi(100);p | Basidiomycota(100);c      | Agaricomycetes(100);o                  | Russulales(100);f                             | Russulaceae(100);g                             | Lactarius(100);s                        | Lactarius camphoratus(100);             |
| Otu00082 | k | Fungi(100);p | Basidiomycota(100);c      | Agaricomycetes(100);o                  | Polyporales(100);f                            | Meruliaceae(100);g                             | Hyphoderma(100);s                       | Hyphoderma macaronescum(100);           |
| Otu00083 | k | Fungi(100);p | Basidiomycota(100);c      | Agaricomycetes(100);o                  | unclassified_Agaricomycetes(100);f            | unclassified_Agaricomycetes(100);g             | unclassified_Agaricomycetes(100);s      | Agaricomycetes sp(100);                 |
| Otu00084 | k | Fungi(100);p | unclassified Fungi(100);c | unclassified Fungi(100);o              | unclassified Fungi(100);f                     | unclassified Fungi(100);g                      | unclassified Fungi(100);s               | Fungi sp(100);                          |
| Otu00085 | k | Fungi(100);p | Zygomycota(100);c         | Zygomycota class Incertae sedis(100);o | Mortierellales(100);f                         | Mortierellaceae(100);g                         | Mortierella(100);s                      | Mortierella macrocystis(100);           |
| Otu00086 | k | Fungi(100);p | Ascomycota(100);c         | Eurotiomycetes(100);o                  | Chaetothyriales(100);f                        | Herpotrichiellaceae(100);g                     | unclassified_Herpotrichiellaceae(100);s | Herpotrichiellaceae sp(100);            |
| Otu00087 | k | Fungi(100);p | Basidiomycota(100);c      | Agaricomycetes(100);o                  | Agaricales(100);f                             | Hygrophoraceae(100);g                          | Hygrophorus(100);s                      | Hygrophorus olivaceoalbus(100);         |
| Otu00088 | k | Fungi(100);p | Basidiomycota(100);c      | Agaricomycetes(100);o                  | Agaricales(100);f                             | Cortinariaceae(100);g                          | Cortinarius(100);s                      | Cortinarius rubellus(100);              |
| Otu00089 | k | Fungi(100);p | Basidiomycota(100);c      | Agaricomycetes(100);o                  | Polyporales(100);f                            | Meruliaceae(100);g                             | Junghuhnia(100);s                       | Junghuhnia luteoalba(100);              |
| Otu00090 | k | Fungi(100);p | Basidiomycota(100);c      | Agaricomycetes(100);o                  | Agaricales(100);f                             | unclassified_Agaricales(100);g                 | unclassified_Agaricales(100);s          | Agaricales sp(100);                     |
| Otu00091 | k | Fungi(100);p | Basidiomycota(100);c      | Agaricomycetes(100);o                  | Polyporales(100);f                            | Meruliaceae(100);g                             | Hyphoderma(100);s                       | Hyphoderma praetermissum(100);          |
| Otu00092 | k | Fungi(100);p | unclassified Fungi(75);c  | unclassified Fungi(75);o               | unclassified Fungi(75);f                      | unclassified Fungi(75);g                       | unclassified Fungi(75);s                | Fungi sp(75);                           |
| Otu00093 | k | Fungi(100);p | Basidiomycota(100);c      | Agaricomycetes(100);o                  | Boletales(100);f                              | Boletaceae(100);g                              | unclassified_Boletaceae(100);s          | Boletaceae sp(100);                     |
| Otu00094 | k | Fungi(100);p | Basidiomycota(100);c      | Agaricomycetes(100);o                  | Atheliales(100);f                             | Atheliaceae(100);g                             | Piloderma(100);s                        | Piloderma sp(100);                      |
| Otu00095 | k | Fungi(100);p | Basidiomycota(100);c      | Agaricomycetes(100);o                  | Cantharellales(100);f                         | Cantharellaceae(100);g                         | Craterellus(100);s                      | Craterellus tubaeformis(100);           |
| Otu00096 | k | Fungi(100);p | Ascomycota(100);c         | Eurotiomycetes(100);o                  | Chaetothyriales(100);f                        | unclassified_Chaetothyriales(100);g            | unclassified_Chaetothyriales(100);s     | Chaetothyriales sp(100);                |
| Otu00097 | k | Fungi(100);p | Zygomycota(100);c         | Zygomycota class Incertae sedis(100);o | Mortierellales(100);f                         | Mortierellaceae(100);g                         | Mortierella(100);s                      | Mortierella sp WD32A(100);              |
| Otu00098 | k | Fungi(100);p | Basidiomycota(100);c      | Agaricomycetes(100);o                  | Polyporales(99);f                             | Polyporaceae(99);g                             | Grammothele(99);s                       | Grammothele fuligo cf_RG_2014(99);      |
| Otu00099 | k | Fungi(100);p | Basidiomycota(100);c      | Microbotryomycetes(99);o               | Microbotryomycetes order Incertae sedis(87);f | Microbotryomycetes family Incertae sedis(87);g | Curvibasidium(87);s                     | Curvibasidium cygneicollum(87);         |
| Otu00100 | k | Fungi(100);p | Ascomycota(100);c         | Leotiomycetes(100);o                   | Helotiales(100);f                             | unclassified_Helotiales(96);g                  | unclassified_Helotiales(96);s           | Helotiales sp(96);                      |
| Otu00101 | k | Fungi(100);p | Zygomycota(100);c         | Zygomycota class Incertae sedis(100);o | Mortierellales(100);f                         | Mortierellaceae(100);g                         | Mortierella(100);s                      | Mortierella sp 1_RB_2011(100);          |
| Otu00102 | k | Fungi(100);p | Basidiomycota(100);c      | Agaricomycetes(100);o                  | Atheliales(100);f                             | Atheliaceae(100);g                             | Tylospora(100);s                        | Tylospora sp(100);                      |
| Otu00103 | k | Fungi(100);p | Zygomycota(100);c         | Zygomycota class Incertae sedis(100);o | Mucorales(100);f                              | Umbelopsidaceae(100);g                         | Umbelopsis(100);s                       | Umbelopsis isabellina(99);              |
| Otu00104 | k | Fungi(100);p | Basidiomycota(100);c      | Agaricomycetes(100);o                  | Atheliales(100);f                             | Atheliaceae(100);g                             | Fibulorhizocetonia(100);s               | Fibulorhizocetonia sp(100);             |
| Otu00106 | k | Fungi(100);p | Ascomycota(100);c         | Sordariomycetes(100);o                 | Hypocreales(100);f                            | Cordycipitaceae(100);g                         | Beauveria(100);s                        | Beauveria virella(100);                 |
| Otu00107 | k | Fungi(100);p | Basidiomycota(100);c      | Agaricomycetes(100);o                  | Hymenochaetales(100);f                        | Schizoporaceae(100);g                          | Hyphodontia(100);s                      | Hyphodontia alutacea(100);              |
| Otu00108 | k | Fungi(100);p | Basidiomycota(100);c      | Agaricomycetes(100);o                  | Polyporales(100);f                            | Meruliaceae(100);g                             | Phlebia(100);s                          | Phlebia centrifuga(100);                |
| Otu00109 | k | Fungi(97);p  | Basidiomycota(97);c       | Tremellomycetes(97);o                  | Filobasidiales(97);f                          | Filobasidiaceae(97);g                          | Cryptococcus(97);s                      | Cryptococcus albidus var. ovalis(97);   |
| Otu00110 | k | Fungi(98);p  | Chytridiomycota(98);c     | Chytridiomycetes(98);o                 | Chytridiales(98);f                            | Chytridiales family Incertae sedis(98);g       | Avachytrium(98);s                       | Avachytrium platense(98);               |
| Otu00111 | k | Fungi(100);p | Ascomycota(100);c         | Leotiomycetes(100);o                   | Helotiales(100);f                             | Helotiales family Incertae sedis(100);g        | Hyphodiscus(100);s                      | Hyphodiscus hymeniophilus(100);         |
| Otu00112 | k | Fungi(100);p | unclassified Fungi(100);c | unclassified Fungi(100);o              | unclassified Fungi(100);f                     | unclassified Fungi(100);g                      | unclassified Fungi(100);s               | Fungi sp(100);                          |
| Otu00113 | k | Fungi(100);p | Basidiomycota(100);c      | Agaricomycetes(100);o                  | Trechisporales(100);f                         | unclassified_Trechisporales(100);g             | unclassified_Trechisporales(100);s      | Trechisporales sp(100);                 |
| Otu00115 | k | Fungi(100);p | Ascomycota(100);c         | Eurotiomycetes(100);o                  | Chaetothyriales(100);f                        | unclassified_Chaetothyriales(100);g            | unclassified_Chaetothyriales(100);s     | Chaetothyriales sp(100);                |
| Otu00116 | k | Fungi(100);p | Basidiomycota(100);c      | Agaricomycetes(100);o                  | Cantharellales(100);f                         | Botrybasidiaceae(100);g                        | unclassified_Botrybasidiaceae(100);s    | Botrybasidiaceae sp(100);               |
| Otu00117 | k | Fungi(95);p  | Basidiomycota(95);c       | Agaricomycetes(95);o                   | Hymenochaetales(95);f                         | Hymenochaetales(95);g                          | Tubulicrinis(95);s                      | Tubulicrinis sp(95);                    |
| Otu00118 | k | Fungi(100);p | Basidiomycota(100);c      | Agaricomycetes(100);o                  | Agaricales(100);f                             | Cortinariaceae(100);g                          | Cortinarius(100);s                      | Cortinarius brunneus var. brunneus(99); |
| Otu00119 | k | Fungi(100);p | Basidiomycota(100);c      | Tremellomycetes(95);o                  | Trichosporonales(94);f                        | Trichosporonaceae(94);g                        | Trichosporon(94);s                      | Trichosporon middelhovenii(94);         |
| Otu00120 | k | Fungi(100);p | Ascomycota(100);c         | Leotiomycetes(100);o                   | unclassified_Leotiomycetes(100);f             | unclassified_Leotiomycetes(100);g              | unclassified_Leotiomycetes(100);s       | Leotiomycetes sp(100);                  |
| Otu00121 | k | Fungi(100);p | Ascomycota(100);c         | Eurotiomycetes(100);o                  | Chaetothyriales(100);f                        | Herpotrichiellaceae(100);g                     | unclassified_Herpotrichiellaceae(100);s | Herpotrichiellaceae sp(100);            |
| Otu00122 | k | Fungi(100);p | Basidiomycota(100);c      | Agaricomycetes(100);o                  | Atheliales(100);f                             | Atheliaceae(100);g                             | unclassified_Atheliaceae(76);s          | Atheliaceae sp(76);                     |
| Otu00123 | k | Fungi(100);p | Ascomycota(100);c         | Eurotiomycetes(100);o                  | Chaetothyriales(100);f                        | unclassified_Chaetothyriales(100);g            | unclassified_Chaetothyriales(100);s     | Chaetothyriales sp(100);                |
| Otu00124 | k | Fungi(100);p | Basidiomycota(100);c      | Agaricomycetes(100);o                  | Agaricales(100);f                             | Inocybaceae(100);g                             | Inocybe(100);s                          | Inocybe boreocarelica(100);             |
| Otu00125 | k | Fungi(100);p | Basidiomycota(100);c      | Agaricomycetes(100);o                  | Atheliales(100);f                             | Atheliaceae(100);g                             | Piloderma(100);s                        | Piloderma sp B328(100);                 |
| Otu00126 | k | Fungi(100);p | Zygomycota(100);c         | Zygomycota class Incertae sedis(100);o | Mucorales(100);f                              | Umbelopsidaceae(100);g                         | Umbelopsis(100);s                       | Umbelopsis sp(100);                     |
| Otu00127 | k | Fungi(100);p | Basidiomycota(100);c      | Agaricomycetes(100);o                  | Russulales(100);f                             | Russulaceae(100);g                             | Lactarius(100);s                        | Lactarius trivialis(100);               |
| Otu00128 | k | Fungi(100);p | Basidiomycota(100);c      | Agaricomycetes(100);o                  | Agaricales(100);f                             | Marasmiaceae(100);g                            | Rhodocollybia(100);s                    | Rhodocollybia butyracea(96);            |
| Otu00129 | k | Fungi(100);p | Basidiomycota(100);c      | Agaricomycetes(100);o                  | Sebacinales(100);f                            | unclassified_Sebacinales(100);g                | unclassified_Sebacinales(100);s         | Sebacinales sp(100);                    |
| Otu00130 | k | Fungi(100);p | Basidiomycota(100);c      | Agaricomycetes(100);o                  | Boletales(100);f                              | Suillaceae(100);g                              | Suillus(100);s                          | Suillus variegatus(100);                |
| Otu00131 | k | Fungi(100);p | Basidiomycota(100);c      | Agaricomycetes(100);o                  | Agaricomycetes order Incertae sedis(100);f    | Agaricomycetes family Incertae sedis(100);g    | Resinicium(100);s                       | Resinicium bicolor(100);                |
| Otu00132 | k | Fungi(100);p | unclassified Fungi(100);c | unclassified Fungi(100);o              | unclassified Fungi(100);f                     | unclassified Fungi(100);g                      | unclassified Fungi(100);s               | Fungi sp(100);                          |
| Otu00133 | k | Fungi(100);p | Basidiomycota(100);c      | Agaricomycetes(100);o                  | Agaricales(100);f                             | Amanitaceae(100);g                             | Amanita(100);s                          | Amanita porphyria(100);                 |
| Otu00135 | k | Fungi(100);p | Zygomycota(100);c         | Zygomycota class Incertae sedis(100);o | Mortierellales(100);f                         | Mortierellaceae(100);g                         | Mortierella(100);s                      | Mortierella sp(98);                     |

Supplementary, TableS1A  
 Taxonomy of OTUs  
 Normalized data, identification according to blast UNITEv57

|          |               |                    |                           |                                        |                                             |                                                  |                                         |                                   |
|----------|---------------|--------------------|---------------------------|----------------------------------------|---------------------------------------------|--------------------------------------------------|-----------------------------------------|-----------------------------------|
| Otu00136 | k             | Fungi(100);p       | Basidiomycota(100);c      | Agaricomycetes(100);o                  | Cantharellales(100);f                       | Hydnaceae(100);g                                 | Hydnum(100);s                           | Hydnum_sp(100);                   |
| Otu00137 | k             | Fungi(100);p       | Basidiomycota(100);c      | Agaricomycetes(100);o                  | Agaricales(100);f                           | Mycenaceae(100);g                                | Mycena(100);s                           | Mycena_sp_NFLI_2000_63/5(100);    |
| Otu00138 | k             | Fungi(100);p       | Basidiomycota(100);c      | Agaricomycetes(100);o                  | Boletales(100);f                            | Coniophoraceae(100);g                            | Coniophora(100);s                       | Coniophora_sp_olrim361(93);       |
| Otu00139 | k             | Fungi(100);p       | Basidiomycota(100);c      | Agaricomycetes(100);o                  | Agaricales(100);f                           | Cortinariaceae(100);g                            | Cortinarius(100);s                      | Cortinarius_armillatus(100);      |
| Otu00140 | k             | Fungi(100);p       | Basidiomycota(100);c      | Agaricomycetes(100);o                  | Polyporales(100);f                          | Fomitopsidaceae(100);g                           | Pycnoporellus(100);s                    | Pycnoporellus_fulgens(100);       |
| Otu00141 | k             | Fungi(100);p       | Ascomycota(100);c         | Leotiomycetes(100);o                   | Helotiales(100);f                           | unclassified_Helotiales(100);g                   | unclassified_Helotiales(100);s          | Helotiales_sp(100);               |
| Otu00142 | k             | Fungi(100);p       | Basidiomycota(100);c      | Agaricomycetes(100);o                  | Agaricales(100);f                           | Strophariaceae(100);g                            | Gymnopilus(100);s                       | Gymnopilus_picreus(100);          |
| Otu00143 | k             | Fungi(100);p       | Ascomycota(100);c         | Eurotiomycetes(100);o                  | Chaetothyriales(100);f                      | unclassified_Chaetothyriales(100);g              | unclassified_Chaetothyriales(100);s     | Chaetothyriales_sp(100);          |
| Otu00144 | k             | Fungi(100);p       | Ascomycota(100);c         | Leotiomycetes(100);o                   | Helotiales(100);f                           | Helotiales_family_Incertae_sedis(100);g          | Leptodontidium(100);s                   | Leptodontidium_sp_Di124_4(100);   |
| Otu00145 | k             | Fungi(88);p        | Ascomycota(88);c          | Sordariomycetes(88);o                  | Microascales(88);f                          | Halosphaeriaceae(88);g                           | Lignicola(88);s                         | Lignicola_laevis(88);             |
| Otu00146 | k             | Fungi(100);p       | Basidiomycota(100);c      | Agaricomycetes(100);o                  | Russulales(100);f                           | Russulaceae(100);g                               | Russula(100);s                          | Russula_vinosa(100);              |
| Otu00147 | k             | Fungi(53);p        | Glomeromycota(53);c       | Glomeromycetes(53);o                   | Archaeosporales(53);f                       | Archaeosporaceae(53);g                           | unclassified_Archaeosporaceae(53);s     | Archaeosporaceae_sp(53);          |
| Otu00148 | k             | Fungi(100);p       | Basidiomycota(100);c      | Agaricomycetes(100);o                  | Agaricales(100);f                           | Mycenaceae(99);g                                 | Mycena(99);s                            | Mycena_sp(99);                    |
| Otu00149 | k             | Fungi(100);p       | Ascomycota(100);c         | Leotiomycetes(100);o                   | Helotiales(100);f                           | unclassified_Helotiales(100);g                   | unclassified_Helotiales(100);s          | Helotiales_sp(100);               |
| Otu00150 | k             | Fungi(100);p       | Basidiomycota(100);c      | Agaricomycetes(100);o                  | Polyporales(100);f                          | Fomitopsidaceae(100);g                           | Fomitopsis(100);s                       | Fomitopsis_rosea(100);            |
| Otu00151 | k             | Fungi(100);p       | Ascomycota(100);c         | Dothideomycetes(100);o                 | Hysteriales(100);f                          | Gloniaceae(100);g                                | Cenococcum(100);s                       | Cenococcum_geophilum(100);        |
| Otu00152 | unknown(100); | unclassified(100); | unclassified(100);        | unclassified(100);                     | unclassified(100);                          | unclassified(100);                               | unclassified(100);                      | unclassified(100);                |
| Otu00153 | k             | Fungi(100);p       | Basidiomycota(100);c      | Agaricomycetes(100);o                  | Cantharellales(100);f                       | Clavulinaceae(86);g                              | unclassified_Clavulinaceae(86);s        | Clavulinaceae_sp(86);             |
| Otu00154 | k             | Fungi(89);p        | Ascomycota(86);c          | Saccharomycetes(86);o                  | Saccharomycetales(86);f                     | Dipodascaceae(86);g                              | Basidioascus(86);s                      | Basidioascus_magus(86);           |
| Otu00155 | k             | Fungi(100);p       | Zygomycota(100);c         | Zygomycota_class_Incertae_sedis(100);o | Mortierellales(100);f                       | Mortierellaceae(100);g                           | Mortierella(100);s                      | Mortierella_pulchella(100);       |
| Otu00156 | k             | Fungi(100);p       | Basidiomycota(100);c      | Agaricomycetes(100);o                  | Russulales(100);f                           | Russulaceae(100);g                               | Russula(100);s                          | Russula_emetica(100);             |
| Otu00157 | k             | Fungi(100);p       | Basidiomycota(100);c      | Agaricomycetes(100);o                  | Thelephorales(100);f                        | Thelephoraceae(100);g                            | Tomentella(100);s                       | Tomentella_coerulea(100);         |
| Otu00158 | k             | Fungi(100);p       | Basidiomycota(100);c      | Agaricomycetes(100);o                  | Polyporales(100);f                          | Xenasmataceae(100);g                             | Xenasmata(100);s                        | Xenasmata_sp(100);                |
| Otu00159 | k             | Fungi(100);p       | Ascomycota(100);c         | Eurotiomycetes(100);o                  | Eurotiales(100);f                           | Trichocomaceae(100);g                            | Penicillium(100);s                      | Penicillium_thomii(91);           |
| Otu00160 | k             | Fungi(100);p       | Ascomycota(100);c         | Leotiomycetes(100);o                   | Helotiales(100);f                           | Helotiales_family_Incertae_sedis(100);g          | Ascocoryne(100);s                       | Ascocoryne_sp(100);               |
| Otu00161 | k             | Fungi(100);p       | Zygomycota(100);c         | Zygomycota_class_Incertae_sedis(100);o | Mucorales(100);f                            | Umbelopsidaceae(100);g                           | Umbelopsis(100);s                       | Umbelopsis_isabellina(76);        |
| Otu00162 | k             | Fungi(100);p       | Basidiomycota(100);c      | Agaricomycetes(100);o                  | Hymenochaetales(100);f                      | Schizoporaaceae(100);g                           | Hyphodontia(100);s                      | Hyphodontia_alutacea(100);        |
| Otu00163 | k             | Fungi(100);p       | Ascomycota(100);c         | Saccharomycetes(99);o                  | Saccharomycetales(99);f                     | Trichomonascaceae(94);g                          | Blastobotrys(94);s                      | Blastobotrys_serpentis(94);       |
| Otu00164 | k             | Fungi(100);p       | Basidiomycota(100);c      | Agaricomycetes(100);o                  | unclassified_Agaricomycetes(100);f          | unclassified_Agaricomycetes(100);g               | unclassified_Agaricomycetes(100);s      | Agaricomycetes_sp(100);           |
| Otu00165 | k             | Fungi(100);p       | Basidiomycota(100);c      | Agaricomycetes(100);o                  | Cantharellales(100);f                       | Hydnaceae(100);g                                 | Sistotrema(100);s                       | Sistotrema_sp(100);               |
| Otu00166 | k             | Fungi(86);p        | Ascomycota(86);c          | Dothideomycetes(80);o                  | unclassified_Dothideomycetes(80);f          | unclassified_Dothideomycetes(80);g               | unclassified_Dothideomycetes(80);s      | Dothideomycetes_sp(80);           |
| Otu00167 | k             | Fungi(100);p       | Basidiomycota(100);c      | Agaricomycetes(100);o                  | Boletales(100);f                            | Serpulaceae(100);g                               | Serpula(100);s                          | Serpula_himantoides(100);         |
| Otu00168 | k             | Fungi(100);p       | Basidiomycota(100);c      | Tremellomycetes(100);o                 | Cystofilobasidiales(100);f                  | Cystofilobasidiales_family_Incertae_sedis(100);g | Syzygospora(100);s                      | Syzygospora_sp(100);              |
| Otu00169 | k             | Fungi(100);p       | Basidiomycota(100);c      | Agaricomycetes(100);o                  | Agaricales(100);f                           | Mycenaceae(100);g                                | Mycena(100);s                           | Mycena_sanguinolenta(100);        |
| Otu00170 | k             | Fungi(100);p       | Basidiomycota(100);c      | Agaricomycetes(100);o                  | Atheliales(100);f                           | Atheliaceae(100);g                               | Amphinema(98);s                         | Amphinema_sp(98);                 |
| Otu00171 | k             | Fungi(100);p       | Ascomycota(100);c         | Eurotiomycetes(100);o                  | Chaetothyriales(100);f                      | Herpotrichiellaceae(100);g                       | unclassified_Herpotrichiellaceae(100);s | Herpotrichiellaceae_sp(100);      |
| Otu00172 | k             | Fungi(100);p       | Basidiomycota(100);c      | Agaricomycetes(100);o                  | Thelephorales(100);f                        | Thelephoraceae(100);g                            | Pseudotomentella(100);s                 | Pseudotomentella_mucidula(100);   |
| Otu00173 | k             | Fungi(100);p       | Ascomycota(100);c         | Leotiomycetes(100);o                   | Helotiales(100);f                           | Helotiales_family_Incertae_sedis(100);g          | Scytalidium(100);s                      | Scytalidium_sp(100);              |
| Otu00174 | k             | Fungi(100);p       | Basidiomycota(100);c      | Agaricomycetes(100);o                  | Agaricales(100);f                           | Amanitaceae(100);g                               | Amanita(100);s                          | Amanita_sp(100);                  |
| Otu00175 | k             | Fungi(100);p       | Ascomycota(100);c         | Dothideomycetes(100);o                 | Dothideomycetes_order_Incertae_sedis(100);f | Myxotrichaceae(100);g                            | Oidiodendron(100);s                     | Oidiodendron_sp(100);             |
| Otu00176 | k             | Fungi(100);p       | Ascomycota(100);c         | Leotiomycetes(100);o                   | Helotiales(100);f                           | Dermateaceae(100);g                              | unclassified_Dermateaceae(100);s        | uncultured_Dermateaceae(100);     |
| Otu00177 | k             | Fungi(100);p       | Zygomycota(100);c         | Zygomycota_class_Incertae_sedis(100);o | Mortierellales(100);f                       | Mortierellaceae(100);g                           | Mortierella(100);s                      | Mortierella_minutissima(95);      |
| Otu00178 | k             | Fungi(100);p       | Basidiomycota(100);c      | Agaricomycetes(100);o                  | Russulales(100);f                           | Russulaceae(100);g                               | Russula(100);s                          | Russula-vesca(100);               |
| Otu00179 | k             | Fungi(100);p       | Basidiomycota(100);c      | Agaricomycetes(100);o                  | Auriculariales(100);f                       | unclassified_Auriculariales(100);g               | unclassified_Auriculariales(100);s      | Auriculariales_sp(100);           |
| Otu00180 | k             | Fungi(100);p       | Basidiomycota(100);c      | Agaricomycetes(100);o                  | Agaricales(100);f                           | Cortinariaceae(100);g                            | Cortinarius(100);s                      | Cortinarius_caperatus(100);       |
| Otu00181 | k             | Fungi(100);p       | Basidiomycota(100);c      | Agaricomycetes(100);o                  | Agaricales(100);f                           | Mycenaceae(100);g                                | Xeromphalina(100);s                     | Xeromphalina_sp(100);             |
| Otu00182 | k             | Fungi(88);p        | Ascomycota(88);c          | Sordariomycetes(88);o                  | Ophiostomatales(88);f                       | Ophiostomataceae(88);g                           | Leptographium(88);s                     | Leptographium_piriforme(88);      |
| Otu00183 | k             | Fungi(100);p       | Basidiomycota(100);c      | Agaricomycetes(100);o                  | Cantharellales(100);f                       | Botryobasidiaceae(100);g                         | Botryobasidium(100);s                   | Botryobasidium_subcoronatum(100); |
| Otu00184 | k             | Fungi(100);p       | Zygomycota(100);c         | Zygomycota_class_Incertae_sedis(100);o | Mortierellales(100);f                       | Mortierellaceae(100);g                           | Mortierella(100);s                      | Mortierella_parvispora(100);      |
| Otu00185 | k             | Fungi(100);p       | Ascomycota(100);c         | unclassified_Ascomycota(89);o          | unclassified_Ascomycota(89);f               | unclassified_Ascomycota(89);g                    | unclassified_Ascomycota(89);s           | Ascomycota_sp(89);                |
| Otu00186 | k             | Fungi(90);p        | Basidiomycota(90);c       | Agaricomycetes(90);o                   | Polyporales(90);f                           | Fomitopsidaceae(90);g                            | Anomoloma(90);s                         | Anomoloma_myceliosum(90);         |
| Otu00187 | k             | Fungi(100);p       | Basidiomycota(100);c      | Agaricomycetes(100);o                  | Russulales(100);f                           | Russulaceae(100);g                               | Lactarius(100);s                        | Lactarius_tabidus(100);           |
| Otu00188 | k             | Fungi(100);p       | Ascomycota(100);c         | Leotiomycetes(100);o                   | Helotiales(100);f                           | unclassified_Helotiales(100);g                   | unclassified_Helotiales(100);s          | Helotiales_sp(100);               |
| Otu00189 | k             | Fungi(100);p       | Basidiomycota(100);c      | Agaricomycetes(100);o                  | Thelephorales(100);f                        | Thelephoraceae(100);g                            | Pseudotomentella(100);s                 | Pseudotomentella_sp(100);         |
| Otu00190 | k             | Fungi(100);p       | Basidiomycota(100);c      | Agaricomycetes(100);o                  | Cantharellales(100);f                       | Botryobasidiaceae(100);g                         | unclassified_Botryobasidiaceae(100);s   | Botryobasidiaceae_sp(100);        |
| Otu00191 | k             | Fungi(100);p       | Basidiomycota(100);c      | Agaricomycetes(100);o                  | Atheliales(100);f                           | Atheliaceae(100);g                               | Piloderma(100);s                        | Piloderma_sp(90);                 |
| Otu00192 | k             | Fungi(100);p       | Basidiomycota(100);c      | Agaricomycetes(100);o                  | Agaricales(100);f                           | Strophariaceae(86);g                             | Galerina(86);s                          | Galerina_sp_GM_18_04(86);         |
| Otu00193 | k             | Fungi(100);p       | unclassified_Fungi(100);c | unclassified_Fungi(100);o              | unclassified_Fungi(100);f                   | unclassified_Fungi(100);g                        | unclassified_Fungi(100);s               | Fungi_sp(100);                    |
| Otu00194 | k             | Fungi(88);p        | Basidiomycota(88);c       | Agaricomycetes(88);o                   | Hymenochaetales(87);f                       | Hymenochaetaeaceae(87);g                         | Tubulicrinis(87);s                      | Tubulicrinis_sp(87);              |
| Otu00195 | k             | Fungi(100);p       | Basidiomycota(100);c      | Agaricomycetes(100);o                  | Agaricales(100);f                           | unclassified_Agaricales(100);g                   | unclassified_Agaricales(100);s          | Agaricales_sp(100);               |
| Otu00196 | k             | Fungi(100);p       | Basidiomycota(100);c      | Agaricomycetes(100);o                  | Agaricales(100);f                           | Amanitaceae(100);g                               | Amanita(100);s                          | Amanita_virosa(84);               |
| Otu00197 | k             | Fungi(100);p       | Zygomycota(100);c         | Zygomycota_class_Incertae_sedis(100);o | Mortierellales(100);f                       | Mortierellaceae(100);g                           | Mortierella(100);s                      | Mortierella_globulifera(100);     |
| Otu00198 | k             | Fungi(100);p       | Basidiomycota(100);c      | Agaricomycetes(100);o                  | Hymenochaetales(100);f                      | Hymenochaetaeaceae(100);g                        | Phellogilium(100);s                     | Phellogilium_nigrolimitatus(100); |
| Otu00199 | k             | Fungi(100);p       | Basidiomycota(100);c      | Microbotryomycetes(100);o              | Microbotryomycetales(100);f                 | Leucosporidiaceae(100);g                         | Leucosporidium(100);s                   | Leucosporidium_drummii(100);      |
| Otu00200 | k             | Fungi(100);p       | Ascomycota(100);c         | Pezizomycetes(96);o                    | Pezizales(96);f                             | Pyronemataceae(96);g                             | unclassified_Pyronemataceae(96);s       | Pyronemataceae_sp(96);            |
| Otu00201 | k             | Fungi(100);p       | Ascomycota(100);c         | Leotiomycetes(100);o                   | Helotiales(100);f                           | Vibriseaceae(100);g                              | Phialocephala(100);s                    | Phialocephala_dimorphospora(100); |

Supplementary, TableS1A  
 Taxonomy of OTUs  
 Normalized data, identification according to blast UNITEv57

|          |   |              |                          |                                        |                                             |                                             |                                        |                                   |
|----------|---|--------------|--------------------------|----------------------------------------|---------------------------------------------|---------------------------------------------|----------------------------------------|-----------------------------------|
| Otu00202 | k | Fungi(100);p | Ascomycota(100);c        | Leotiomycetes(100);o                   | Helotiales(100);f                           | Dermateaceae(100);g                         | unclassified Dermateaceae(100);s       | Dermateaceae_sp(100);             |
| Otu00203 | k | Fungi(100);p | Basidiomycota(100);c     | Agaricomycetes(100);o                  | Hymenochaetales(100);f                      | unclassified Hymenochaetales(100);g         | unclassified Hymenochaetales(100);s    | Hymenochaetales_sp(100);          |
| Otu00204 | k | Fungi(100);p | Basidiomycota(100);c     | Agaricomycetes(100);o                  | Polyporales(100);f                          | Xenasmataceae(100);g                        | Xenasmata(100);s                       | Xenasmata_sp(100);                |
| Otu00205 | k | Fungi(100);p | Basidiomycota(100);c     | Agaricomycetes(100);o                  | Atheliales(100);f                           | Atheliaceae(99);g                           | unclassified Atheliaceae(97);s         | Atheliaceae_sp(97);               |
| Otu00206 | k | Fungi(100);p | Zygomycota(100);c        | Zygomycota class Incertae sedis(100);o | Mortierellales(100);f                       | Mortierellaceae(100);g                      | Mortierella(100);s                     | Mortierella_sp(100);              |
| Otu00207 | k | Fungi(100);p | Ascomycota(100);c        | Leotiomycetes(100);o                   | Helotiales(100);f                           | unclassified Helotiales(88);g               | unclassified Helotiales(88);s          | Helotiales_sp(88);                |
| Otu00208 | k | Fungi(100);p | Basidiomycota(100);c     | Agaricomycetes(100);o                  | Telephorales(100);f                         | Telephoraceae(100);g                        | Pseudotomentella(100);s                | Pseudotomentella_tristis(100);    |
| Otu00209 | k | Fungi(100);p | Ascomycota(100);c        | Eurotiomycetes(100);o                  | Eurotiales(100);f                           | Trichocmataceae(100);g                      | Penicillium(100);s                     | Penicillium_citreonigrum(100);    |
| Otu00210 | k | Fungi(100);p | Ascomycota(100);c        | Dothideomycetes(100);o                 | Hysteriales(100);f                          | Gloniaceae(100);g                           | Cenococcum(100);s                      | Cenococcum_geophilum(100);        |
| Otu00211 | k | Fungi(100);p | Basidiomycota(100);c     | Agaricomycetes(100);o                  | Atheliales(100);f                           | Atheliaceae(100);g                          | Tretomyces(100);s                      | Tretomyces_lutescens(100);        |
| Otu00212 | k | Fungi(100);p | Basidiomycota(100);c     | Agaricomycetes(100);o                  | Agaricales(100);f                           | Cortinariaceae(100);g                       | Cortinarius(100);s                     | Cortinarius_traganus(100);        |
| Otu00213 | k | Fungi(93);p  | Basidiomycota(93);c      | Agaricomycetes(93);o                   | Cantharellales(93);f                        | Botryobasidiaceae(93);g                     | unclassified Botryobasidiaceae(93);s   | Botryobasidiaceae_sp(93);         |
| Otu00214 | k | Fungi(100);p | Basidiomycota(100);c     | Agaricomycetes(100);o                  | Atheliales(100);f                           | Atheliaceae(100);g                          | Piloderma(100);s                       | Piloderma_sp(100);                |
| Otu00215 | k | Fungi(100);p | Basidiomycota(100);c     | Agaricomycetes(100);o                  | Russulales(100);f                           | Russulaceae(100);g                          | Russula(100);s                         | Russula_puellaris(100);           |
| Otu00216 | k | Fungi(100);p | Basidiomycota(100);c     | Agaricomycetes(100);o                  | Sebacinales(100);f                          | unclassified Sebacinales(99);g              | unclassified Sebacinales(99);s         | uncultured Sebacinales(99);       |
| Otu00217 | k | Fungi(95);p  | Ascomycota(93);c         | Sordariomycetes(56);o                  | Ophiostomatales(56);f                       | Ophiostomataceae(56);g                      | Ophiostoma(56);s                       | Ophiostoma_denticulatum(56);      |
| Otu00218 | k | Fungi(100);p | Basidiomycota(100);c     | Agaricomycetes(100);o                  | Telephorales(100);f                         | Telephoraceae(100);g                        | Tomentella(100);s                      | Tomentella_sp(100);               |
| Otu00219 | k | Fungi(100);p | Basidiomycota(100);c     | Agaricomycetes(100);o                  | Telephorales(100);f                         | Telephoraceae(100);g                        | Tomentella(100);s                      | Tomentella_subilacina(100);       |
| Otu00220 | k | Fungi(100);p | Ascomycota(100);c        | Leotiomycetes(100);o                   | Helotiales(100);f                           | unclassified Helotiales(100);g              | unclassified Helotiales(100);s         | Helotiales_sp(100);               |
| Otu00221 | k | Fungi(100);p | Ascomycota(100);c        | Eurotiomycetes(100);o                  | Chaetothyriales(100);f                      | Herpotrichiellaceae(100);g                  | Cladophialophora(100);s                | Cladophialophora_sp_TRN488(100);  |
| Otu00222 | k | Fungi(100);p | Basidiomycota(100);c     | Agaricomycetes(100);o                  | Atheliales(100);f                           | Atheliaceae(100);g                          | Tylospora(100);s                       | Tylospora_sp(100);                |
| Otu00223 | k | Fungi(100);p | Basidiomycota(100);c     | Agaricomycetes(100);o                  | Telephorales(100);f                         | Telephoraceae(100);g                        | unclassified Telephoraceae(100);s      | Telephoraceae_sp(100);            |
| Otu00224 | k | Fungi(100);p | Basidiomycota(100);c     | Agaricomycetes(100);o                  | Agaricales(100);f                           | Tricholomataceae(100);g                     | Tricholoma(100);s                      | Tricholoma_sejunctum(100);        |
| Otu00225 | k | Fungi(100);p | Basidiomycota(100);c     | Agaricomycetes(100);o                  | unclassified Agaricomycetes(100);f          | unclassified Agaricomycetes(100);g          | unclassified Agaricomycetes(100);s     | Agaricomycetes_sp(100);           |
| Otu00226 | k | Fungi(100);p | Ascomycota(100);c        | Leotiomycetes(100);o                   | Helotiales(100);f                           | unclassified Helotiales(100);g              | unclassified Helotiales(100);s         | Helotiales_sp(100);               |
| Otu00227 | k | Fungi(100);p | Ascomycota(100);c        | Dothideomycetes(100);o                 | Hysteriales(100);f                          | Gloniaceae(100);g                           | Cenococcum(100);s                      | Cenococcum_sp(100);               |
| Otu00228 | k | Fungi(84);p  | Glomeromycota(84);c      | Glomeromycetes(84);o                   | Archaeosporales(84);f                       | Archaeosporaceae(84);g                      | unclassified Archaeosporaceae(84);s    | Archaeosporaceae_sp(84);          |
| Otu00229 | k | Fungi(62);p  | Basidiomycota(62);c      | Agaricomycetes(62);o                   | Cantharellales(62);f                        | Botryobasidiaceae(62);g                     | unclassified(100);s                    | unclassified(100);                |
| Otu00230 | k | Fungi(99);p  | unclassified Fungi(99);c | unclassified Fungi(99);o               | unclassified Fungi(99);f                    | unclassified Fungi(99);g                    | unclassified Fungi(99);s               | Fungi_sp(99);                     |
| Otu00231 | k | Fungi(100);p | Ascomycota(100);c        | unclassified Ascomycota(99);o          | unclassified Ascomycota(99);f               | unclassified Ascomycota(99);g               | unclassified Ascomycota(99);s          | Ascomycota_sp(99);                |
| Otu00232 | k | Fungi(94);p  | Basidiomycota(85);c      | Tremellomycetes(85);o                  | Tremellales(71);f                           | Tremellales_family_Incertae_sedis(71);g     | Bandoniozyma(70);s                     | Bandoniozyma_glucofermentans(70); |
| Otu00233 | k | Fungi(100);p | Ascomycota(100);c        | Sordariomycetes(100);o                 | Ophiostomatales(100);f                      | Ophiostomataceae(100);g                     | Ophiostoma(100);s                      | Ophiostoma_tetropii(100);         |
| Otu00234 | k | Fungi(100);p | Basidiomycota(100);c     | Agaricomycetes(100);o                  | Russulales(100);f                           | Russulaceae(100);g                          | Russula(100);s                         | Russula_sapinea(100);             |
| Otu00235 | k | Fungi(100);p | Basidiomycota(100);c     | Agaricomycetes(100);o                  | Trechisporales(100);f                       | unclassified Trechisporales(99);g           | unclassified Trechisporales(99);s      | Trechisporales_sp(99);            |
| Otu00236 | k | Fungi(100);p | Basidiomycota(100);c     | Agaricomycetes(100);o                  | Polyporales(100);f                          | Meruliaceae(100);g                          | Hypochnicium(100);s                    | Hypochnicium_albostramineum(100); |
| Otu00237 | k | Fungi(100);p | Basidiomycota(100);c     | Agaricomycetes(100);o                  | Russulales(100);f                           | Russulaceae(100);g                          | Russula(100);s                         | Russula_sp(100);                  |
| Otu00238 | k | Fungi(100);p | Ascomycota(100);c        | unclassified Ascomycota(100);o         | unclassified Ascomycota(100);f              | unclassified Ascomycota(100);g              | unclassified Ascomycota(100);s         | Ascomycota_sp(100);               |
| Otu00239 | k | Fungi(97);p  | Ascomycota(97);c         | Eurotiomycetes(97);o                   | Onygenales(97);f                            | Ajellomycetaceae(97);g                      | Spiromastix(97);s                      | Spiromastix_warcupii(97);         |
| Otu00240 | k | Fungi(100);p | Ascomycota(100);c        | Dothideomycetes(100);o                 | Dothideomycetes_order_Incertae_sedis(100);f | Pseudeurotiaceae(100);g                     | unclassified Pseudeurotiaceae(100);s   | Pseudeurotiaceae_sp(100);         |
| Otu00241 | k | Fungi(100);p | Basidiomycota(100);c     | Agaricomycetes(100);o                  | Auriculariales(100);f                       | Auriculariales_family_Incertae_sedis(100);g | Exidia(100);s                          | Exidia_sp(100);                   |
| Otu00242 | k | Fungi(100);p | Basidiomycota(100);c     | Agaricomycetes(100);o                  | Atheliales(100);f                           | Atheliaceae(100);g                          | Tylospora(100);s                       | Tylospora_sp(100);                |
| Otu00243 | k | Fungi(100);p | Ascomycota(100);c        | Leotiomycetes(100);o                   | Helotiales(100);f                           | Helotiales_family_Incertae_sedis(100);g     | Scytalidium(100);s                     | Scytalidium_sp(100);              |
| Otu00244 | k | Fungi(100);p | Basidiomycota(100);c     | Agaricomycetes(100);o                  | Cantharellales(100);f                       | Cantharellaceae(100);g                      | Craterellus(100);s                     | Craterellus_cornucopioides(100);  |
| Otu00246 | k | Fungi(100);p | Ascomycota(100);c        | Leotiomycetes(100);o                   | Helotiales(100);f                           | Helotiales_family_Incertae_sedis(100);g     | Infundichalara(100);s                  | Infundichalara_sp(100);           |
| Otu00247 | k | Fungi(100);p | Basidiomycota(100);c     | Agaricomycetes(100);o                  | Polyporales(100);f                          | Fomitopsidaceae(100);g                      | Postia(100);s                          | Postia_renyi(100);                |
| Otu00248 | k | Fungi(100);p | Basidiomycota(100);c     | Agaricomycetes(100);o                  | Agaricales(100);f                           | Entolomataceae(100);g                       | Entoloma(100);s                        | Entoloma_sp(100);                 |
| Otu00249 | k | Fungi(100);p | Ascomycota(100);c        | Leotiomycetes(100);o                   | Rhytismatales(100);f                        | Rhytismataceae(100);g                       | Lophodermium(100);s                    | Lophodermium_piceae(100);         |
| Otu00250 | k | Fungi(100);p | Basidiomycota(100);c     | Agaricomycetes(100);o                  | Agaricales(100);f                           | Mycenaceae(100);g                           | Mycena(100);s                          | Mycena_sp(100);                   |
| Otu00251 | k | Fungi(100);p | Basidiomycota(100);c     | Agaricomycetes(100);o                  | Agaricales(100);f                           | Mycenaceae(100);g                           | Mycena(100);s                          | Mycena_rubromarginata(100);       |
| Otu00252 | k | Fungi(90);p  | unclassified Fungi(84);c | unclassified Fungi(84);o               | unclassified Fungi(84);f                    | unclassified Fungi(84);g                    | unclassified Fungi(84);s               | Fungi_sp(84);                     |
| Otu00253 | k | Fungi(100);p | Ascomycota(100);c        | Sordariomycetes(100);o                 | Chaetosphaeriales(100);f                    | Chaetosphaeriaceae(100);g                   | unclassified Chaetosphaeriaceae(100);s | Chaetosphaeriaceae_sp(100);       |
| Otu00254 | k | Fungi(85);p  | Chytridiomycota(85);c    | Chytridiomycetes(85);o                 | Chytridiales(85);f                          | Chytridiales_family_Incertae_sedis(85);g    | Avachytrium(85);s                      | Avachytrium_platense(85);         |
| Otu00255 | k | Fungi(100);p | Ascomycota(100);c        | Leotiomycetes(100);o                   | Helotiales(100);f                           | unclassified Helotiales(100);g              | unclassified Helotiales(100);s         | Helotiales_sp(100);               |
| Otu00256 | k | Fungi(100);p | Basidiomycota(100);c     | Agaricomycetes(100);o                  | Agaricales(100);f                           | Mycenaceae(100);g                           | Mycena(100);s                          | Mycena_sp(100);                   |
| Otu00257 | k | Fungi(81);p  | Rozellomycota(81);c      | unclassified Rozellomycota(81);o       | unclassified Rozellomycota(81);f            | unclassified Rozellomycota(81);g            | unclassified Rozellomycota(81);s       | Rozellomycota_sp(81);             |
| Otu00258 | k | Fungi(100);p | Basidiomycota(100);c     | Tremellomycetes(100);o                 | Tremellales(100);f                          | Tremellales_family_Incertae_sedis(100);g    | Cryptococcus(100);s                    | Cryptococcus_podzolicus(100);     |
| Otu00259 | k | Fungi(100);p | Ascomycota(100);c        | Eurotiomycetes(100);o                  | Chaetothyriales(100);f                      | Herpotrichiellaceae(100);g                  | unclassified Herpotrichiellaceae(99);s | Herpotrichiellaceae_sp(99);       |
| Otu00260 | k | Fungi(100);p | Ascomycota(100);c        | Sordariomycetes(100);o                 | Hypocreales(100);f                          | unclassified Hypocreales(100);g             | unclassified Hypocreales(100);s        | Hypocreales_sp(100);              |
| Otu00261 | k | Fungi(100);p | Basidiomycota(100);c     | Agaricomycetes(100);o                  | Agaricales(100);f                           | Inocybaceae(100);g                          | Inocybe(100);s                         | Inocybe_relicina(100);            |
| Otu00262 | k | Fungi(100);p | Ascomycota(100);c        | Leotiomycetes(100);o                   | Helotiales(100);f                           | Helotiales_family_Incertae_sedis(100);g     | Leptodontidium(100);s                  | Leptodontidium_sp(100);           |
| Otu00263 | k | Fungi(100);p | Basidiomycota(100);c     | Agaricomycetes(100);o                  | Hymenochaetales(100);f                      | Schizoporaaceae(100);g                      | Hyphodontia(98);s                      | Hyphodontia_aspera(98);           |
| Otu00264 | k | Fungi(92);p  | Ascomycota(92);c         | Pezizomycetes(80);o                    | Pezizales(80);f                             | Tuberaceae(80);g                            | Tuber(80);s                            | Tuber_sp(80);                     |
| Otu00265 | k | Fungi(100);p | Basidiomycota(100);c     | Agaricomycetes(100);o                  | Agaricales(100);f                           | Hygrophoraceae(100);g                       | Ampulloclitocybe(100);s                | Ampulloclitocybe_clavipes(100);   |
| Otu00267 | k | Fungi(100);p | Ascomycota(100);c        | Sordariomycetes(100);o                 | Lulworthiales(100);f                        | Lulworthiaceae(100);g                       | Zalerion(100);s                        | Zalerion_arboricola(100);         |
| Otu00268 | k | Fungi(100);p | Ascomycota(88);c         | Saccharomycetes(88);o                  | Saccharomycetales(88);f                     | Dipodascaceae(88);g                         | Basidioascus(88);s                     | Basidioascus_magus(88);           |
| Otu00269 | k | Fungi(100);p | Ascomycota(100);c        | Lecanoromycetes(65);o                  | Pertusariales(59);f                         | Ochrolechiaceae(59);g                       | Ochrolechia(59);s                      | Ochrolechia_zatalaensis(59);      |

Supplementary, TableS1A  
 Taxonomy of OTUs  
 Normalized data, identification according to blast UNITEv57

|          |                                                                                                         |              |                          |                                        |                                             |                                                |                                        |                                     |
|----------|---------------------------------------------------------------------------------------------------------|--------------|--------------------------|----------------------------------------|---------------------------------------------|------------------------------------------------|----------------------------------------|-------------------------------------|
| Otu00270 | k                                                                                                       | Fungi(100);p | Basidiomycota(100);c     | Agaricomycetes(100);o                  | Auriculariales(100);f                       | unclassified_Auriculariales(100);g             | unclassified_Auriculariales(100);s     | Auriculariales_sp(100);             |
| Otu00271 | k                                                                                                       | Fungi(100);p | Zygomycota(100);c        | Zygomycota_class_Incertae_sedis(100);o | Mortierellales(100);f                       | Mortierellaceae(100);g                         | Mortierella(100);s                     | Mortierella_sp(100);                |
| Otu00272 | k                                                                                                       | Fungi(100);p | Basidiomycota(100);c     | Agaricomycetes(100);o                  | Auriculariales(100);f                       | Auriculariales_family_Incertae_sedis(100);g    | Auricularia(100);s                     | Auricularia_sp(100);                |
| Otu00273 | k                                                                                                       | Fungi(100);p | Basidiomycota(100);c     | Agaricomycetes(100);o                  | Hymenochaetales(100);f                      | Schizoporaaceae(100);g                         | Schizopora(100);s                      | Schizopora_paradoxa(100);           |
| Otu00274 | k                                                                                                       | Fungi(98);p  | unclassified_Fungi(98);c | unclassified_Fungi(98);o               | unclassified_Fungi(98);f                    | unclassified_Fungi(98);g                       | unclassified_Fungi(98);s               | Fungi_sp(98);                       |
| Otu00275 | k                                                                                                       | Fungi(100);p | Basidiomycota(100);c     | Agaricomycetes(100);o                  | Thelephorales(100);f                        | Thelephoraceae(100);g                          | Tomentella(100);s                      | Tomentella_stuposa(100);            |
| Otu00276 | unknown(100);unclassified(100);unclassified(100);unclassified(100);unclassified(100);unclassified(100); |              |                          |                                        |                                             |                                                |                                        |                                     |
| Otu00277 | k                                                                                                       | Fungi(90);p  | unclassified_Fungi(90);c | unclassified_Fungi(90);o               | unclassified_Fungi(90);f                    | unclassified_Fungi(90);g                       | unclassified_Fungi(90);s               | Fungi_sp(90);                       |
| Otu00278 | k                                                                                                       | Fungi(100);p | Basidiomycota(100);c     | Agaricomycetes(100);o                  | unclassified_Agaricomycetes(94);f           | unclassified_Agaricomycetes(94);g              | unclassified_Agaricomycetes(94);s      | Agaricomycetes_sp(94);              |
| Otu00279 | k                                                                                                       | Fungi(93);p  | Basidiomycota(93);c      | Agaricomycetes(93);o                   | Auriculariales(93);f                        | Auriculariales_family_Incertae_sedis(93);g     | Protodontia(93);s                      | Protodontia_piceicola(93);          |
| Otu00280 | k                                                                                                       | Fungi(100);p | Basidiomycota(100);c     | Agaricomycetes(100);o                  | Atheliales(100);f                           | Atheliaceae(100);g                             | unclassified_Atheliaceae(100);s        | Atheliaceae_sp(100);                |
| Otu00281 | k                                                                                                       | Fungi(100);p | Basidiomycota(100);c     | Agaricomycetes(100);o                  | Polyporales(100);f                          | Polyporaceae(100);g                            | Skeletocutis(100);s                    | Skeletocutis_diluta(100);           |
| Otu00282 | k                                                                                                       | Fungi(100);p | Ascomycota(100);c        | Leotiomycetes(100);o                   | Rhizomatales(100);f                         | Cudoniaceae(100);g                             | Cudonia(100);s                         | Cudonia_circinans(100);             |
| Otu00283 | k                                                                                                       | Fungi(100);p | Basidiomycota(100);c     | Agaricomycetes(100);o                  | Cantharellales(100);f                       | Clavulinaceae(100);g                           | unclassified_Clavulinaceae(100);s      | Clavulinaceae_sp(100);              |
| Otu00284 | k                                                                                                       | Fungi(100);p | Basidiomycota(100);c     | Agaricomycetes(100);o                  | Polyporales(100);f                          | Meruliaceae(100);g                             | Hyphoderma(100);s                      | Hyphoderma_setigerum(100);          |
| Otu00285 | k                                                                                                       | Fungi(92);p  | Ascomycota(92);c         | Sordariomycetes(91);o                  | Ophiostomatales(91);f                       | Ophiostomataceae(91);g                         | Ophiostoma(91);s                       | Ophiostoma_denticulatum(91);        |
| Otu00286 | k                                                                                                       | Fungi(100);p | Basidiomycota(100);c     | Agaricomycetes(100);o                  | Agaricales(100);f                           | Strophariaceae(100);g                          | Galerina(100);s                        | Galerina_pseudobadipes(100);        |
| Otu00287 | k                                                                                                       | Fungi(100);p | Basidiomycota(100);c     | Agaricomycetes(100);o                  | Agaricales(100);f                           | Clavariaceae(100);g                            | Clavulinopsis(100);s                   | Clavulinopsis_luteoalba(100);       |
| Otu00288 | k                                                                                                       | Fungi(100);p | Ascomycota(100);c        | Saccharomycetes(100);o                 | Saccharomycetales(100);f                    | Saccharomycetales_family_Incertae_sedis(100);g | unclassified_Saccharomycetales(100);s  | Saccharomycetales_sp(100);          |
| Otu00289 | k                                                                                                       | Fungi(100);p | Basidiomycota(100);c     | Agaricomycetes(100);o                  | Cantharellales(100);f                       | unclassified_Cantharellales(98);g              | unclassified_Cantharellales(98);s      | Cantharellales_sp(98);              |
| Otu00290 | k                                                                                                       | Fungi(100);p | Basidiomycota(100);c     | Agaricomycetes(100);o                  | Russulales(100);f                           | Amylostereaceae(100);g                         | Amylostereum(100);s                    | Amylostereum_areolatum(100);        |
| Otu00291 | k                                                                                                       | Fungi(100);p | Basidiomycota(100);c     | Agaricomycetes(100);o                  | Hymenochaetales(100);f                      | unclassified_Hymenochaetales(100);g            | unclassified_Hymenochaetales(100);s    | Hymenochaetales_sp(100);            |
| Otu00292 | k                                                                                                       | Fungi(100);p | Ascomycota(100);c        | Dothideomycetes(100);o                 | Dothideomycetes_order_Incertae_sedis(100);f | Myxotrichaceae(100);g                          | Oidiodendron(100);s                    | Oidiodendron_sp(100);               |
| Otu00293 | k                                                                                                       | Fungi(100);p | Ascomycota(100);c        | Leotiomycetes(100);o                   | Helotiales(100);f                           | Hyaloscyphaceae(100);g                         | unclassified_Hyaloscyphaceae(100);s    | Hyaloscyphaceae_sp_IV_GK_2010(100); |
| Otu00294 | k                                                                                                       | Fungi(100);p | Ascomycota(100);c        | Leotiomycetes(100);o                   | Helotiales(95);f                            | unclassified_Helotiales(95);g                  | unclassified_Helotiales(95);s          | Helotiales_sp(95);                  |
| Otu00295 | k                                                                                                       | Fungi(100);p | Zygomycota(100);c        | Zygomycota_class_Incertae_sedis(100);o | Mortierellales(100);f                       | Mortierellaceae(100);g                         | Mortierella(100);s                     | Mortierella_gemmifera(100);         |
| Otu00296 | k                                                                                                       | Fungi(100);p | Zygomycota(100);c        | Zygomycota_class_Incertae_sedis(100);o | Mortierellales(100);f                       | Mortierellaceae(100);g                         | Mortierella(100);s                     | Mortierella_turficola(100);         |
| Otu00297 | k                                                                                                       | Fungi(100);p | Ascomycota(100);c        | Saccharomycetes(100);o                 | Saccharomycetales(100);f                    | unclassified_Saccharomycetales(100);g          | unclassified_Saccharomycetales(100);s  | Saccharomycetales_sp(100);          |
| Otu00298 | k                                                                                                       | Fungi(100);p | Ascomycota(100);c        | unclassified_Ascomycota(100);o         | unclassified_Ascomycota(100);f              | unclassified_Ascomycota(100);g                 | unclassified_Ascomycota(100);s         | Ascomycota_sp(100);                 |
| Otu00299 | k                                                                                                       | Fungi(100);p | Ascomycota(100);c        | unclassified_Ascomycota(100);o         | unclassified_Ascomycota(100);f              | unclassified_Ascomycota(100);g                 | unclassified_Ascomycota(100);s         | Ascomycota_sp(100);                 |
| Otu00300 | k                                                                                                       | Fungi(100);p | Ascomycota(100);c        | Eurotiomycetes(100);o                  | Chaetothyriales(100);f                      | Herpotrichiellaceae(79);g                      | unclassified_Herpotrichiellaceae(79);s | Herpotrichiellaceae_sp(79);         |
| Otu00301 | k                                                                                                       | Fungi(100);p | Basidiomycota(100);c     | Tremellomycetes(100);o                 | unclassified_Tremellomycetes(100);f         | unclassified_Tremellomycetes(100);g            | unclassified_Tremellomycetes(100);s    | Tremellomycetes_sp(100);            |
| Otu00302 | k                                                                                                       | Fungi(100);p | Basidiomycota(100);c     | Agaricomycetes(100);o                  | Trechisporales(100);f                       | unclassified_Trechisporales(100);g             | unclassified_Trechisporales(100);s     | Trechisporales_sp(100);             |
| Otu00303 | k                                                                                                       | Fungi(100);p | Basidiomycota(100);c     | Agaricomycetes(100);o                  | Agaricales(100);f                           | Entolomataceae(100);g                          | Entoloma(100);s                        | Entoloma_rhodoclyx(100);            |
| Otu00304 | k                                                                                                       | Fungi(100);p | Basidiomycota(100);c     | Agaricomycetes(100);o                  | Agaricales(100);f                           | Agaricaceae(100);g                             | Lycoperdon(100);s                      | unclassified(100);                  |
| Otu00305 | k                                                                                                       | Fungi(100);p | Basidiomycota(100);c     | Agaricomycetes(100);o                  | Thelephorales(99);f                         | Thelephoraceae(99);g                           | Thelephora(99);s                       | Thelephora_ganbajun(99);            |
| Otu00306 | k                                                                                                       | Fungi(100);p | Basidiomycota(100);c     | Agaricomycetes(100);o                  | Boletales(100);f                            | Boletales_family_Incertae_sedis(100);g         | Jaapia(100);s                          | Jaapia_sp(100);                     |
| Otu00307 | k                                                                                                       | Fungi(100);p | Zygomycota(100);c        | Zygomycota_class_Incertae_sedis(100);o | Mucorales(100);f                            | Umbelopsidaceae(100);g                         | Umbelopsis_sp_XYL_2013(69);            |                                     |
| Otu00308 | k                                                                                                       | Fungi(100);p | Basidiomycota(100);c     | Agaricomycetes(100);o                  | Thelephorales(100);f                        | Thelephoraceae(100);g                          | Pseudotomentella(100);s                | Pseudotomentella_humicola(100);     |
| Otu00309 | k                                                                                                       | Fungi(100);p | Basidiomycota(100);c     | Agaricomycetes(100);o                  | Russulales(100);f                           | Russulaceae(100);g                             | Russula(100);s                         | Russula_aquosa(100);                |
| Otu00310 | k                                                                                                       | Fungi(100);p | Basidiomycota(100);c     | Agaricomycetes(100);o                  | Atheliales(100);f                           | Atheliaceae(100);g                             | Piloderma(100);s                       | Piloderma_sphaerosporum(100);       |
| Otu00311 | k                                                                                                       | Fungi(100);p | Ascomycota(100);c        | Leotiomycetes(100);o                   | Helotiales(100);f                           | Helotiales_family_Incertae_sedis(100);g        | Scytalidium(100);s                     | Scytalidium_sp(100);                |
| Otu00312 | k                                                                                                       | Fungi(100);p | Ascomycota(100);c        | Leotiomycetes(100);o                   | Helotiales(100);f                           | unclassified_Helotiales(100);g                 | unclassified_Helotiales(100);s         | Helotiales_sp(100);                 |
| Otu00313 | k                                                                                                       | Fungi(100);p | Ascomycota(100);c        | Sordariomycetes(100);o                 | Ophiostomatales(100);f                      | Ophiostomataceae(100);g                        | Ophiostoma(100);s                      | Ophiostoma_rectangulosporium(100);  |
| Otu00314 | k                                                                                                       | Fungi(100);p | Ascomycota(100);c        | Saccharomycetes(100);o                 | Saccharomycetales(100);f                    | Trichomonascaceae(97);g                        | Sugiyamaella(97);s                     | Sugiyamaella_sp_MAL_2012(97);       |
| Otu00315 | k                                                                                                       | Fungi(100);p | Basidiomycota(100);c     | Agaricomycetes(100);o                  | Polyporales(100);f                          | Meruliaceae(100);g                             | Crustoderma(100);s                     | Crustoderma_dryinum(100);           |
| Otu00316 | k                                                                                                       | Fungi(100);p | Basidiomycota(100);c     | unclassified_Basidiomycota(100);o      | unclassified_Basidiomycota(100);f           | unclassified_Basidiomycota(100);g              | unclassified_Basidiomycota(100);s      | Basidiomycota_sp(100);              |
| Otu00317 | k                                                                                                       | Fungi(100);p | Ascomycota(100);c        | Ascomycota_class_Incertae_sedis(100);o | Ascomycota_order_Incertae_sedis(100);f      | Ascomycota_family_Incertae_sedis(100);g        | Xenochalara(72);s                      | Xenochalara_sp(72);                 |
| Otu00318 | k                                                                                                       | Fungi(100);p | Ascomycota(100);c        | Eurotiomycetes(100);o                  | Chaetothyriales(100);f                      | unclassified_Chaetothyriales(100);g            | unclassified_Chaetothyriales(100);s    | Chaetothyriales_sp(100);            |
| Otu00319 | k                                                                                                       | Fungi(100);p | Basidiomycota(100);c     | Agaricomycetes(100);o                  | Agaricales(100);f                           | Cortinariaceae(100);g                          | Cortinarius(100);s                     | Cortinarius_sp(100);                |
| Otu00320 | k                                                                                                       | Fungi(100);p | Basidiomycota(100);c     | Agaricomycetes(100);o                  | Atheliales(100);f                           | Atheliaceae(100);g                             | Piloderma(100);s                       | Piloderma_sp(100);                  |
| Otu00321 | k                                                                                                       | Fungi(100);p | Ascomycota(100);c        | Sordariomycetes(100);o                 | unclassified_Sordariomycetes(100);f         | unclassified_Sordariomycetes(100);g            | unclassified_Sordariomycetes(100);s    | Sordariomycetes_sp(100);            |
| Otu00322 | k                                                                                                       | Fungi(100);p | Ascomycota(100);c        | Peizomycetes(100);o                    | Pezizales(100);f                            | Pyrenomataceae(100);g                          | Otidea(100);s                          | Otidea_leporina(100);               |
| Otu00323 | k                                                                                                       | Fungi(100);p | Basidiomycota(100);c     | Agaricomycetes(100);o                  | Agaricales(100);f                           | Cortinariaceae(100);g                          | Cortinarius(100);s                     | Cortinarius_flexipes(100);          |
| Otu00325 | k                                                                                                       | Fungi(100);p | Basidiomycota(100);c     | Agaricomycetes(100);o                  | Agaricales(100);f                           | Amanitaceae(100);g                             | Amanita(100);s                         | Amanita_fulva(100);                 |
| Otu00326 | k                                                                                                       | Fungi(87);p  | Glomeromycota(87);c      | Glomeromycetes(87);o                   | Archaeosporales(87);f                       | Archaeosporaceae(87);g                         | unclassified_Archaeosporaceae(87);s    | Archaeosporaceae_sp(87);            |
| Otu00327 | k                                                                                                       | Fungi(100);p | Ascomycota(100);c        | Peizomycetes(100);o                    | Pezizales(100);f                            | Sarcosomataceae(100);g                         | Pseudoplectania(100);s                 | Pseudoplectania_sp(100);            |
| Otu00328 | k                                                                                                       | Fungi(100);p | Basidiomycota(100);c     | Agaricomycetes(100);o                  | Auriculariales(100);f                       | unclassified_Auriculariales(100);g             | unclassified_Auriculariales(100);s     | Auriculariales_sp(100);             |
| Otu00329 | k                                                                                                       | Fungi(100);p | Basidiomycota(100);c     | Agaricomycetes(100);o                  | Hymenochaetales(100);f                      | Hymenochaetales_family_Incertae_sedis(100);g   | Phelopilus(100);s                      | Phelopilus_nigrolimitatus(100);     |
| Otu00330 | k                                                                                                       | Fungi(98);p  | unclassified_Fungi(94);c | unclassified_Fungi(94);o               | unclassified_Fungi(94);f                    | unclassified_Fungi(94);g                       | unclassified_Fungi(94);s               | Fungi_sp(94);                       |
| Otu00331 | k                                                                                                       | Fungi(100);p | Ascomycota(100);c        | Leotiomycetes(100);o                   | Helotiales(100);f                           | Hyaloscyphaceae(91);g                          | unclassified_Hyaloscyphaceae(91);s     | Hyaloscyphaceae_sp(91);             |
| Otu00332 | k                                                                                                       | Fungi(100);p | Basidiomycota(100);c     | Agaricomycetes(100);o                  | Thelephorales(100);f                        | Thelephoraceae(100);g                          | Pseudotomentella(100);s                | Pseudotomentella_sp(100);           |
| Otu00333 | k                                                                                                       | Fungi(100);p | Basidiomycota(100);c     | Agaricomycetes(100);o                  | Atheliales(100);f                           | Atheliaceae(100);g                             | Tretomyces(100);s                      | Tretomyces_lutescens(100);          |
| Otu00334 | k                                                                                                       | Fungi(100);p | Zygomycota(100);c        | Zygomycota_class_Incertae_sedis(100);o | Mortierellales(100);f                       | Mortierellaceae(100);g                         | Mortierella(100);s                     | Mortierella_globulifera(100);       |
| Otu00335 | k                                                                                                       | Fungi(100);p | Basidiomycota(100);c     | unclassified_Basidiomycota(98);o       | unclassified_Basidiomycota(98);f            | unclassified_Basidiomycota(98);g               | unclassified_Basidiomycota(98);s       | Basidiomycota_sp(98);               |
| Otu00336 | k                                                                                                       | Fungi(100);p | Ascomycota(100);c        | unclassified_Ascomycota(99);o          | unclassified_Ascomycota(99);f               | unclassified_Ascomycota(99);g                  | unclassified_Ascomycota(99);s          | Ascomycota_sp(99);                  |

Supplementary, TableS1A  
 Taxonomy of OTUs  
 Normalized data, identification according to blast UNITEv57

|          |                                                                                                         |              |                           |                                        |                                             |                                                |                                       |                                     |
|----------|---------------------------------------------------------------------------------------------------------|--------------|---------------------------|----------------------------------------|---------------------------------------------|------------------------------------------------|---------------------------------------|-------------------------------------|
| Otu00337 | k                                                                                                       | Fungi(100);p | Basidiomycota(100);c      | Agaricomycetes(100);o                  | Polyporales(100);f                          | Fomitopsidaceae(100);g                         | Postia(100);s                         | Postia_stiptica(100);               |
| Otu00338 | k                                                                                                       | Fungi(100);p | Basidiomycota(100);c      | Agaricomycetes(100);o                  | Agaricales(100);f                           | Cortinariaceae(100);g                          | Cortinarius(100);s                    | Cortinarius_favrei_f_pallidus(100); |
| Otu00339 | k                                                                                                       | Fungi(100);p | unclassified_Fungi(100);c | unclassified_Fungi(100);o              | unclassified_Fungi(100);f                   | unclassified_Fungi(100);g                      | unclassified_Fungi(100);s             | Fungi_sp(100);                      |
| Otu00340 | k                                                                                                       | Fungi(100);p | Ascomycota(100);c         | Leotiomycetes(100);o                   | Helotiales(100);f                           | unclassified_Helotiales(100);g                 | unclassified_Helotiales(100);s        | Helotiales_sp(100);                 |
| Otu00341 | k                                                                                                       | Fungi(100);p | Basidiomycota(100);c      | Agaricomycetes(100);o                  | Agaricales(100);f                           | Cortinariaceae(100);g                          | Cortinarius(100);s                    | Cortinarius_brunneifolius(100);     |
| Otu00342 | k                                                                                                       | Fungi(100);p | Basidiomycota(100);c      | Agaricomycetes(100);o                  | Thelephorales(100);f                        | Thelephoraceae(100);g                          | Tomentella(100);s                     | Tomentella_bryophilata(100);        |
| Otu00343 | k                                                                                                       | Fungi(97);p  | Basidiomycota(97);c       | Agaricomycetes(97);o                   | Cantharellales(97);f                        | Clavulinaceae(97);g                            | Clavulina(97);s                       | Clavulina_sp(97);                   |
| Otu00344 | k                                                                                                       | Fungi(100);p | Ascomycota(100);c         | Leotiomycetes(100);o                   | Helotiales(100);f                           | unclassified_Helotiales(100);g                 | unclassified_Helotiales(100);s        | Helotiales_sp(100);                 |
| Otu00345 | k                                                                                                       | Fungi(100);p | Basidiomycota(100);c      | Agaricomycetes(100);o                  | Russulales(100);f                           | Russulaceae(100);g                             | Lactarius(100);s                      | Lactarius_vietus(100);              |
| Otu00346 | k                                                                                                       | Fungi(100);p | Ascomycota(100);c         | Saccharomycetes(100);o                 | Saccharomycetales(100);f                    | Saccharomycetales_family_Incertae_sedis(100);g | Candida(100);s                        | Candida_sp_NCAIM_Y01956(100);       |
| Otu00347 | k                                                                                                       | Fungi(100);p | Ascomycota(100);c         | Leotiomycetes(100);o                   | Helotiales(100);f                           | Vibrissaceae(100);g                            | Phialocephala(100);s                  | Phialocephala_scopiformis(100);     |
| Otu00348 | k                                                                                                       | Fungi(77);p  | unclassified_Fungi(75);c  | unclassified_Fungi(75);o               | unclassified_Fungi(75);f                    | unclassified_Fungi(75);g                       | unclassified_Fungi(75);s              | Fungi_sp(75);                       |
| Otu00349 | unknown(100);unclassified(100);unclassified(100);unclassified(100);unclassified(100);unclassified(100); |              |                           |                                        |                                             |                                                |                                       |                                     |
| Otu00350 | k                                                                                                       | Fungi(100);p | Basidiomycota(100);c      | Agaricomycetes(100);o                  | Polyporales(100);f                          | Polyporales_family_Incertae_sedis(100);g       | Phlebiella(100);s                     | Phlebiella_christiansenii(100);     |
| Otu00351 | k                                                                                                       | Fungi(95);p  | Basidiomycota(95);c       | Tremellomycetes(94);o                  | Filobasidiales(94);f                        | Filobasidiaceae(94);g                          | Cryptococcus(94);s                    | Cryptococcus_uzbekistanensis(94);   |
| Otu00352 | k                                                                                                       | Fungi(100);p | Ascomycota(100);c         | Saccharomycetes(100);o                 | Saccharomycetales(100);f                    | Saccharomycetales_family_Incertae_sedis(100);g | Candida(100);s                        | Candida_krusiit(100);               |
| Otu00353 | unknown(100);unclassified(100);unclassified(100);unclassified(100);unclassified(100);unclassified(100); |              |                           |                                        |                                             |                                                |                                       |                                     |
| Otu00354 | k                                                                                                       | Fungi(100);p | Basidiomycota(100);c      | Agaricomycetes(100);o                  | Russulales(100);f                           | Russulaceae(100);g                             | Russula(100);s                        | Russula_sp(100);                    |
| Otu00355 | k                                                                                                       | Fungi(100);p | Basidiomycota(100);c      | Agaricomycetes(100);o                  | Cantharellales(100);f                       | Hydnaceae(100);g                               | Sistotrema(100);s                     | Sistotrema_sp_PC14(100);            |
| Otu00356 | k                                                                                                       | Fungi(100);p | Basidiomycota(100);c      | Agaricomycetes(100);o                  | Cantharellales(100);f                       | unclassified_Cantharellales(100);g             | unclassified_Cantharellales(100);s    | Cantharellales_sp(100);             |
| Otu00357 | k                                                                                                       | Fungi(100);p | Ascomycota(100);c         | Leotiomycetes(100);o                   | Helotiales(100);f                           | Vibrissaceae(99);g                             | Phialocephala(98);s                   | Phialocephala_fortinii(98);         |
| Otu00358 | k                                                                                                       | Fungi(100);p | Basidiomycota(100);c      | Agaricomycetes(100);o                  | Atheliales(100);f                           | Atheliales_family_Incertae_sedis(100);g        | Tylospora(100);s                      | Tylospora_sp(100);                  |
| Otu00359 | k                                                                                                       | Fungi(100);p | unclassified_Fungi(100);c | unclassified_Fungi(100);o              | unclassified_Fungi(100);f                   | unclassified_Fungi(100);g                      | unclassified_Fungi(100);s             | Fungi_sp(100);                      |
| Otu00360 | k                                                                                                       | Fungi(99);p  | unclassified_Fungi(99);c  | unclassified_Fungi(99);o               | unclassified_Fungi(99);f                    | unclassified_Fungi(99);g                       | unclassified_Fungi(99);s              | Fungi_sp(99);                       |
| Otu00361 | k                                                                                                       | Fungi(100);p | Basidiomycota(100);c      | Microbotryomycetes(100);o              | Sporidiobolales(100);f                      | Sporidiobolales_family_Incertae_sedis(52);g    | Rhodotorula(52);s                     | Rhodotorula_philyla(52);            |
| Otu00362 | k                                                                                                       | Fungi(100);p | Basidiomycota(100);c      | Agaricomycetes(100);o                  | Cantharellales(100);f                       | Clavulinaceae(100);g                           | unclassified_Clavulinaceae(100);s     | Clavulinaceae_sp(100);              |
| Otu00363 | k                                                                                                       | Fungi(100);p | Ascomycota(100);c         | Eurotiomycetes(100);o                  | Eurotiales(100);f                           | unclassified_Eurotiales(100);g                 | unclassified_Eurotiales(100);s        | Eurotiales_sp(100);                 |
| Otu00364 | k                                                                                                       | Fungi(88);p  | Rozellomycota(88);c       | unclassified_Rozellomycota(88);o       | unclassified_Rozellomycota(88);f            | unclassified_Rozellomycota(88);g               | unclassified_Rozellomycota(88);s      | Rozellomycota_sp(88);               |
| Otu00365 | k                                                                                                       | Fungi(100);p | Basidiomycota(100);c      | Tremellomycetes(100);o                 | Cystofilobasidiales(100);f                  | Cystofilobasidiaceae(100);g                    | Guehomyces(100);s                     | Guehomyces_pullulans(100);          |
| Otu00366 | k                                                                                                       | Fungi(100);p | Ascomycota(100);c         | Leotiomycetes(100);o                   | Helotiales(100);f                           | Helotiales_family_Incertae_sedis(100);g        | Xenopolyscytulum(100);s               | Xenopolyscytulum_sp_CCF_4160(100);  |
| Otu00367 | k                                                                                                       | Fungi(100);p | Basidiomycota(100);c      | Agaricomycetes(100);o                  | Cantharellales(100);f                       | Botryobasidiaceae(100);g                       | Botryobasidium(100);s                 | Botryobasidium_subcoronatum(100);   |
| Otu00368 | k                                                                                                       | Fungi(100);p | Ascomycota(100);c         | Leotiomycetes(100);o                   | Helotiales(100);f                           | Helotiaceae(100);g                             | Rhizoscyphus(98);s                    | Rhizoscyphus_ericae(98);            |
| Otu00369 | k                                                                                                       | Fungi(100);p | Basidiomycota(100);c      | Agaricomycetes(100);o                  | Thelephorales(100);f                        | Thelephoraceae(100);g                          | Thelephora(100);s                     | Thelephora_ganbajun(100);           |
| Otu00370 | k                                                                                                       | Fungi(100);p | Ascomycota(100);c         | Leotiomycetes(94);o                    | Helotiales(94);f                            | Dermateaceae(94);g                             | unclassified_Dermateaceae(94);s       | Dermateaceae_sp(94);                |
| Otu00371 | k                                                                                                       | Fungi(100);p | Zygomycota(100);c         | Zygomycota_class_Incertae_sedis(100);o | Mortierellales(100);f                       | Mortierellaceae(100);g                         | Mortierella(100);s                    | Mortierella_sp(100);                |
| Otu00372 | k                                                                                                       | Fungi(90);p  | Ascomycota(90);c          | Sordariomycetes(90);o                  | Ophiostomatales(90);f                       | Ophiostomataceae(90);g                         | Leptographium(90);s                   | Leptographium_piriforme(90);        |
| Otu00373 | k                                                                                                       | Fungi(100);p | Basidiomycota(100);c      | Agaricomycetes(100);o                  | Polyporales(98);f                           | Meripilaceae(98);g                             | Hydnopolyporus(98);s                  | Hydnopolyporus_fimbriatus(98);      |
| Otu00374 | k                                                                                                       | Fungi(100);p | Basidiomycota(100);c      | Agaricomycetes(100);o                  | Agaricales(100);f                           | Cortinariaceae(100);g                          | Cortinarius(100);s                    | Cortinarius_sp(100);                |
| Otu00375 | k                                                                                                       | Fungi(90);p  | Ascomycota(89);c          | Sordariomycetes(84);o                  | Ophiostomatales(84);f                       | Ophiostomataceae(84);g                         | Ophiostoma(84);s                      | Ophiostoma_denticulatum(84);        |
| Otu00376 | k                                                                                                       | Fungi(100);p | Ascomycota(100);c         | Dothideomycetes(100);o                 | Dothideomycetes_order_Incertae_sedis(100);f | Myxotrichaceae(100);g                          | Oidiendron(100);s                     | Oidiendron_piilcola(100);           |
| Otu00377 | k                                                                                                       | Fungi(100);p | Ascomycota(100);c         | Saccharomycetes(100);o                 | Saccharomycetales(100);f                    | unclassified_Saccharomycetales(98);g           | unclassified_Saccharomycetales(98);s  | Saccharomycetales_sp(98);           |
| Otu00378 | k                                                                                                       | Fungi(100);p | Basidiomycota(100);c      | Agaricomycetes(100);o                  | Agaricales(100);f                           | Cortinariaceae(100);g                          | Cortinarius(100);s                    | Cortinarius_illuminus(100);         |
| Otu00379 | k                                                                                                       | Fungi(100);p | Basidiomycota(100);c      | Agaricomycetes(100);o                  | Thelephorales(100);f                        | Thelephoraceae(100);g                          | Tomentella(100);s                     | Tomentella_sp(100);                 |
| Otu00380 | k                                                                                                       | Fungi(100);p | Basidiomycota(100);c      | Agaricomycetes(100);o                  | Russulales(100);f                           | Russulaceae(100);g                             | Russula(100);s                        | Russula_decolorans(100);            |
| Otu00381 | k                                                                                                       | Fungi(100);p | Ascomycota(100);c         | Saccharomycetes(100);o                 | Saccharomycetales(100);f                    | unclassified_Saccharomycetales(100);g          | unclassified_Saccharomycetales(100);s | Saccharomycetales_sp(100);          |
| Otu00382 | k                                                                                                       | Fungi(100);p | Ascomycota(100);c         | Leotiomycetes(100);o                   | Helotiales(100);f                           | unclassified_Helotiales(100);g                 | unclassified_Helotiales(100);s        | Helotiales_sp(100);                 |
| Otu00383 | k                                                                                                       | Fungi(100);p | Basidiomycota(100);c      | Agaricomycetes(100);o                  | Agaricales(100);f                           | Mycenaceae(100);g                              | unclassified_Mycenaceae(100);s        | Mycenaceae_sp(100);                 |
| Otu00384 | k                                                                                                       | Fungi(100);p | Ascomycota(100);c         | Leotiomycetes(100);o                   | Helotiales(100);f                           | Helotiales_family_Incertae_sedis(100);g        | Leptodontidium(100);s                 | Leptodontidium_sp(100);             |
| Otu00385 | k                                                                                                       | Fungi(100);p | Zygomycota(100);c         | Zygomycota_class_Incertae_sedis(100);o | Mortierellales(100);f                       | Mortierellaceae(100);g                         | Mortierella(100);s                    | Mortierella_sp(99);                 |
| Otu00386 | k                                                                                                       | Fungi(100);p | Zygomycota(100);c         | Zygomycota_class_Incertae_sedis(100);o | Mortierellales(100);f                       | Mortierellaceae(100);g                         | Mortierella(100);s                    | Mortierella_sp(100);                |
| Otu00387 | k                                                                                                       | Fungi(98);p  | Basidiomycota(98);c       | Tremellomycetes(59);o                  | Trichosporonales(59);f                      | Trichosporonaceae(59);g                        | Trichosporon(59);s                    | Trichosporon_middehovenii(59);      |
| Otu00388 | k                                                                                                       | Fungi(100);p | Ascomycota(100);c         | Leotiomycetes(100);o                   | Helotiales(100);f                           | Dermateaceae(100);g                            | Pezizula(100);s                       | Pezizula_corylina(100);             |
| Otu00389 | k                                                                                                       | Fungi(100);p | Zygomycota(100);c         | Zygomycota_class_Incertae_sedis(100);o | Mortierellales(100);f                       | Mortierellaceae(100);g                         | Mortierella(100);s                    | Mortierella_sp(100);                |
| Otu00390 | k                                                                                                       | Fungi(100);p | Basidiomycota(100);c      | Agaricomycetes(100);o                  | Thelephorales(100);f                        | Thelephoraceae(100);g                          | Tomentella(100);s                     | Tomentella_sp(100);                 |
| Otu00391 | k                                                                                                       | Fungi(79);p  | Ascomycota(79);c          | Saccharomycetes(79);o                  | Saccharomycetales(79);f                     | Saccharomycetales(79);g                        | Kazachstania(79);s                    | Kazachstania_telluris(79);          |
| Otu00392 | k                                                                                                       | Fungi(100);p | Rozellomycota(100);c      | unclassified_Rozellomycota(100);o      | unclassified_Rozellomycota(100);f           | unclassified_Rozellomycota(100);g              | unclassified_Rozellomycota(100);s     | Rozellomycota_sp(100);              |
| Otu00393 | k                                                                                                       | Fungi(100);p | Ascomycota(100);c         | Leotiomycetes(100);o                   | Helotiales(88);f                            | unclassified_Helotiales(88);g                  | unclassified_Helotiales(88);s         | Helotiales_sp(88);                  |
| Otu00394 | k                                                                                                       | Fungi(100);p | Ascomycota(100);c         | Dothideomycetes(100);o                 | Capnodiales(100);f                          | Teratosphaeriaceae(99);g                       | Penidiella(99);s                      | Penidiella_sp(99);                  |
| Otu00395 | k                                                                                                       | Fungi(100);p | Ascomycota(81);c          | unclassified_Ascomycota(81);o          | unclassified_Ascomycota(81);f               | unclassified_Ascomycota(81);g                  | unclassified_Ascomycota(81);s         | Ascomycota_sp(81);                  |
| Otu00396 | k                                                                                                       | Fungi(100);p | Basidiomycota(100);c      | Agaricomycetes(100);o                  | Russulales(100);f                           | Russulaceae(100);g                             | Russula(100);s                        | Russula_griseascens(100);           |
| Otu00397 | k                                                                                                       | Fungi(100);p | Basidiomycota(100);c      | Agaricomycetes(100);o                  | Sebacinales(100);f                          | unclassified_Sebacinales(100);g                | unclassified_Sebacinales(100);s       | Sebacinales_sp_5390(69);            |
| Otu00398 | k                                                                                                       | Fungi(100);p | Basidiomycota(100);c      | Agaricomycetes(100);o                  | Cantharellales(100);f                       | Clavulinaceae(100);g                           | Clavulina(100);s                      | Clavulina_sp(100);                  |
| Otu00399 | k                                                                                                       | Fungi(100);p | Zygomycota(100);c         | Zygomycota_class_Incertae_sedis(100);o | Mortierellales(100);f                       | Mortierellaceae(100);g                         | Mortierella(100);s                    | Mortierella_sp(100);                |
| Otu00400 | k                                                                                                       | Fungi(100);p | Basidiomycota(100);c      | Microbotryomycetes(100);o              | Sporidiobolales(100);f                      | unclassified_Sporidiobolales(100);g            | unclassified_Sporidiobolales(100);s   | Sporidiobolales_sp(100);            |
| Otu00401 | k                                                                                                       | Fungi(100);p | Basidiomycota(100);c      | Agaricomycetes(100);o                  | Agaricales(100);f                           | Cortinariaceae(100);g                          | Cortinarius(100);s                    | Cortinarius_biformis(100);          |
| Otu00402 | k                                                                                                       | Fungi(100);p | Basidiomycota(100);c      | Agaricomycetes(100);o                  | Agaricomycetes_order_Incertae_sedis(100);f  | Agaricomycetes_family_Incertae_sedis(100);g    | Resinicium(100);s                     | Resinicium_sp(100);                 |

Supplementary, TableS1A  
 Taxonomy of OTUs  
 Normalized data, identification according to blast UNITEv5

|          |                                                                                                         |              |                           |                                        |                                           |                                              |                                     |                                        |
|----------|---------------------------------------------------------------------------------------------------------|--------------|---------------------------|----------------------------------------|-------------------------------------------|----------------------------------------------|-------------------------------------|----------------------------------------|
| Otu00403 | k                                                                                                       | Fungi(100);p | Basidiomycota(100);c      | Microbotryomycetes(100);o              | Sporidiobolales(100);f                    | Sporidiobolales family Incertae sedis(100);g | Sporobolomyces(95);s                | Sporobolomyces singularis(95);         |
| Otu00404 | k                                                                                                       | Fungi(100);p | Ascomycota(100);c         | Leotiomycetes(100);o                   | Rhytismatales(100);f                      | Rhytismataceae(100);g                        | Lophodermium(100);s                 | Lophodermium piceae(100);              |
| Otu00405 | k                                                                                                       | Fungi(100);p | Basidiomycota(100);c      | Tremellomycetes(100);o                 | Filobasidiales(100);f                     | Filobasidiaceae(100);g                       | Cryptococcus(100);s                 | Cryptococcus huempii(100);             |
| Otu00406 | k                                                                                                       | Fungi(100);p | Basidiomycota(100);c      | Agaricomycetes(100);o                  | Trechisporales(96);f                      | unclassified Trechisporales(96);g            | unclassified Trechisporales(96);s   | Trechisporales_sp(96);                 |
| Otu00407 | k                                                                                                       | Fungi(100);p | Basidiomycota(100);c      | Agaricomycetes(100);o                  | Thelephorales(100);f                      | Thelephoraceae(100);g                        | Tomentella(100);s                   | Tomentella_sp(100);                    |
| Otu00408 | k                                                                                                       | Fungi(100);p | Ascomycota(100);c         | Leotiomycetes(100);o                   | Helotiales(100);f                         | unclassified Helotiales(100);g               | unclassified Helotiales(100);s      | Helotiales_sp(100);                    |
| Otu00409 | k                                                                                                       | Fungi(100);p | Basidiomycota(100);c      | Agaricomycetes(100);o                  | Polyporales(97);f                         | Meruliaceae(97);g                            | Hyphoderma(97);s                    | Hyphoderma puberum(97);                |
| Otu00410 | k                                                                                                       | Fungi(100);p | Basidiomycota(100);c      | Tremellomycetes(100);o                 | Tremellales(100);f                        | Tremellales family Incertae sedis(100);g     | Cryptococcus(100);s                 | Cryptococcus_sp(100);                  |
| Otu00411 | k                                                                                                       | Fungi(100);p | Basidiomycota(100);c      | Agaricomycetes(100);o                  | Agaricales(100);f                         | Entolomataceae(100);g                        | unclassified Entolomataceae(100);s  | Entolomataceae_sp(100);                |
| Otu00412 | k                                                                                                       | Fungi(100);p | Basidiomycota(100);c      | Agaricomycetes(100);o                  | Trechisporales(100);f                     | Hydnodontaceae(100);g                        | Trechispora(100);s                  | Trechispora_sp(100);                   |
| Otu00413 | k                                                                                                       | Fungi(100);p | Basidiomycota(100);c      | Agaricomycetes(100);o                  | Atheliales(100);f                         | Atheliaceae(100);g                           | Tylospora(100);s                    | Tylospora_sp(100);                     |
| Otu00414 | k                                                                                                       | Fungi(100);p | Ascomycota(100);c         | Leotiomycetes(100);o                   | Helotiales(100);f                         | unclassified Helotiales(100);g               | unclassified Helotiales(100);s      | Helotiales_sp(100);                    |
| Otu00415 | k                                                                                                       | Fungi(100);p | Ascomycota(100);c         | Leotiomycetes(100);o                   | Helotiales(99);f                          | Hyaloscyphaceae(99);g                        | Hyaloscypha(99);s                   | Hyaloscypha_sp(99);                    |
| Otu00416 | k                                                                                                       | Fungi(96);p  | Basidiomycota(96);c       | Agaricomycetes(96);o                   | Agaricales(74);f                          | Cortinariaceae(74);g                         | Cortinarius(74);s                   | Cortinarius olearioides(74);           |
| Otu00417 | k                                                                                                       | Fungi(100);p | Ascomycota(100);c         | Leotiomycetes(100);o                   | Helotiales(100);f                         | Helotiaceae(100);g                           | unclassified Helotiaceae(100);s     | Helotiaceae_sp(100);                   |
| Otu00418 | k                                                                                                       | Fungi(83);p  | Ascomycota(83);c          | Sordariomycetes(83);o                  | Microascales(83);f                        | Halosphaeriaceae(83);g                       | Lignicola(83);s                     | Lignicola laevis(83);                  |
| Otu00419 | k                                                                                                       | Fungi(100);p | Basidiomycota(100);c      | Agaricomycetes(100);o                  | Russulales(100);f                         | Russulaceae(100);g                           | Russula(93);s                       | Russula_sp(93);                        |
| Otu00420 | k                                                                                                       | Fungi(100);p | Basidiomycota(100);c      | Agaricomycetes(100);o                  | Agaricales(100);f                         | unclassified Agaricales(64);g                | unclassified Agaricales(64);s       | Agaricales_sp(64);                     |
| Otu00421 | k                                                                                                       | Fungi(97);p  | Ascomycota(97);c          | Lecanoromycetes(97);o                  | Lecanorales(94);f                         | Psoraceae(94);g                              | Protoblastenia(94);s                | Protoblastenia laeta(88);              |
| Otu00422 | k                                                                                                       | Fungi(100);p | Zygomycota(100);c         | Zygomycota class Incertae sedis(100);o | Mortierellales(100);f                     | Mortierellaceae(100);g                       | Mortierella(100);s                  | Mortierella_sp_1_RB_2011(100);         |
| Otu00423 | k                                                                                                       | Fungi(100);p | Ascomycota(100);c         | Leotiomycetes(100);o                   | Helotiales(100);f                         | Hyaloscyphaceae(99);g                        | Hyaloscypha(99);s                   | Hyaloscypha aureliella(99);            |
| Otu00424 | k                                                                                                       | Fungi(100);p | Basidiomycota(100);c      | Agaricomycetes(100);o                  | Agaricales(94);f                          | Cortinariaceae(94);g                         | Cortinarius(94);s                   | Cortinarius olearioides(94);           |
| Otu00425 | k                                                                                                       | Fungi(100);p | Basidiomycota(100);c      | Agaricomycetes(100);o                  | Agaricales(100);f                         | Strophariaceae(100);g                        | Hebeloma(100);s                     | Hebeloma leucosax(100);                |
| Otu00426 | k                                                                                                       | Fungi(100);p | Basidiomycota(100);c      | Agaricomycetes(100);o                  | Agaricales(100);f                         | Cortinariaceae(100);g                        | Cortinarius(100);s                  | Cortinarius hemitrichus(100);          |
| Otu00427 | k                                                                                                       | Fungi(100);p | Basidiomycota(100);c      | Agaricomycetes(100);o                  | Russulales(100);f                         | Russulaceae(100);g                           | Russula(100);s                      | Russula griseascens(100);              |
| Otu00428 | k                                                                                                       | Fungi(100);p | Ascomycota(100);c         | Leotiomycetes(100);o                   | Leotiomycetes order Incertae sedis(82);f  | Leotiomycetes family Incertae sedis(82);g    | Melinomyces(82);s                   | Melinomyces bicolor(82);               |
| Otu00429 | k                                                                                                       | Fungi(100);p | Basidiomycota(100);c      | Agaricomycetes(100);o                  | Agaricales(97);f                          | Pluteaceae(97);g                             | Pluteus(97);s                       | Pluteus_sp_UC_1861230(97);             |
| Otu00430 | k                                                                                                       | Fungi(100);p | Ascomycota(100);c         | Saccharomycetes(100);o                 | Saccharomycetales(100);f                  | Lipomycetales(100);g                         | Lipomyces(100);s                    | Lipomyces_sp(100);                     |
| Otu00431 | k                                                                                                       | Fungi(100);p | Basidiomycota(100);c      | Agaricomycetes(100);o                  | Cantharellales(100);f                     | Hydnaceae(100);g                             | Sistotrema(100);s                   | Sistotrema alboluteum(100);            |
| Otu00432 | k                                                                                                       | Fungi(100);p | unclassified Fungi(92);c  | unclassified Fungi(92);o               | unclassified Fungi(92);f                  | unclassified Fungi(92);g                     | unclassified Fungi(92);s            | Fungi_sp(92);                          |
| Otu00433 | k                                                                                                       | Fungi(100);p | Ascomycota(100);c         | Leotiomycetes(100);o                   | Helotiales(100);f                         | Hyaloscyphaceae(100);g                       | Haplographium(100);s                | Haplographium delicatum(100);          |
| Otu00434 | k                                                                                                       | Fungi(82);p  | Glomeromycota(82);c       | Glomeromycetes(82);o                   | Glomerales(82);f                          | Glomeraceae(82);g                            | unclassified Glomeraceae(82);s      | Glomeraceae_sp(82);                    |
| Otu00435 | k                                                                                                       | Fungi(100);p | Basidiomycota(100);c      | Tremellomycetes(100);o                 | Tremellales(100);f                        | Tremellales family Incertae sedis(100);g     | Cryptococcus(100);s                 | Cryptococcus_sp(100);                  |
| Otu00436 | k                                                                                                       | Fungi(100);p | Ascomycota(100);c         | Leotiomycetes(100);o                   | Helotiales(100);f                         | Helotiales family Incertae sedis(100);g      | Infundichalara(100);s               | Infundichalara_sp(100);                |
| Otu00437 | k                                                                                                       | Fungi(92);p  | Ascomycota(85);c          | Sordariomycetes(85);o                  | Ophiostomatales(85);f                     | Ophiostomataceae(85);g                       | Ophiostoma(85);s                    | Ophiostoma denticiliatum(85);          |
| Otu00438 | k                                                                                                       | Fungi(100);p | Ascomycota(100);c         | Leotiomycetes(100);o                   | Leotiomycetes order Incertae sedis(100);f | Leotiomycetes family Incertae sedis(100);g   | Melinomyces(100);s                  | Melinomyces variabilis(100);           |
| Otu00439 | k                                                                                                       | Fungi(100);p | Basidiomycota(100);c      | Agaricomycetes(100);o                  | Cantharellales(100);f                     | Botryobasidiaceae(100);g                     | Botryobasidium(100);s               | Botryobasidium subcoronatum(100);      |
| Otu00440 | k                                                                                                       | Fungi(100);p | Basidiomycota(100);c      | Agaricomycetes(100);o                  | Agaricales(100);f                         | Mycenaceae(100);g                            | Mycena(100);s                       | Mycena_pura_f_multicolor(100);         |
| Otu00441 | k                                                                                                       | Fungi(100);p | Basidiomycota(100);c      | Agaricomycetes(100);o                  | Boletales(100);f                          | Boletales family Incertae sedis(100);g       | Jaapia(100);s                       | Jaapia_sp(100);                        |
| Otu00442 | k                                                                                                       | Fungi(100);p | Basidiomycota(100);c      | Agaricomycetes(100);o                  | Boletales(100);f                          | Suillaceae(100);g                            | Suillus(100);s                      | Suillus variegatus(100);               |
| Otu00443 | k                                                                                                       | Fungi(100);p | Basidiomycota(100);c      | Agaricomycetes(100);o                  | Polyporales(100);f                        | Phanerochaetaceae(100);g                     | Antrodiella(100);s                  | Antrodiella faginea(100);              |
| Otu00444 | k                                                                                                       | Fungi(100);p | Basidiomycota(100);c      | Agaricomycetes(100);o                  | Polyporales(100);f                        | Fomitopsidaceae(99);g                        | Anomoloma(99);s                     | Anomoloma myceliosum(99);              |
| Otu00445 | k                                                                                                       | Fungi(100);p | Basidiomycota(100);c      | Microbotryomycetes(100);o              | Sporidiobolales(100);f                    | Sporidiobolales family Incertae sedis(100);g | Rhodotorula(100);s                  | Rhodotorula lignophilal(100);          |
| Otu00446 | k                                                                                                       | Fungi(99);p  | Ascomycota(99);c          | Eurotiomycetes(90);o                   | Verrucariales(88);f                       | Verrucariaceae(88);g                         | Dermatocarpon(88);s                 | Dermatocarpon luridum_var_luridum(88); |
| Otu00447 | k                                                                                                       | Fungi(100);p | Ascomycota(100);c         | Leotiomycetes(100);o                   | Helotiales(100);f                         | Hyaloscyphaceae(100);g                       | unclassified Hyaloscyphaceae(100);s | Hyaloscyphaceae_sp(100);               |
| Otu00448 | k                                                                                                       | Fungi(100);p | Basidiomycota(100);c      | Agaricomycetes(100);o                  | Atheliales(100);f                         | Atheliaceae(100);g                           | Piloderma(100);s                    | Piloderma fallax(100);                 |
| Otu00449 | k                                                                                                       | Fungi(100);p | Basidiomycota(100);c      | Agaricomycetes(100);o                  | Hymenochaetales(100);f                    | Hymenochaetaceae(100);g                      | Phelopilus(100);s                   | Phelopilus nigrolimitatus(100);        |
| Otu00450 | k                                                                                                       | Fungi(100);p | Ascomycota(100);c         | Leotiomycetes(100);o                   | Helotiales(100);f                         | Helotiaceae(100);g                           | Rhizoscyphus(100);s                 | Rhizoscyphus ericae(100);              |
| Otu00451 | k                                                                                                       | Fungi(100);p | unclassified Fungi(100);c | unclassified Fungi(100);o              | unclassified Fungi(100);f                 | unclassified Fungi(100);g                    | unclassified Fungi(100);s           | Fungi_sp(100);                         |
| Otu00452 | k                                                                                                       | Fungi(100);p | unclassified Fungi(99);c  | unclassified Fungi(99);o               | unclassified Fungi(99);f                  | unclassified Fungi(99);g                     | unclassified Fungi(99);s            | Fungi_sp(99);                          |
| Otu00453 | k                                                                                                       | Fungi(100);p | Basidiomycota(100);c      | Agaricomycetes(100);o                  | Polyporales(93);f                         | Fomitopsidaceae(93);g                        | Anomoloma(93);s                     | Anomoloma myceliosum(93);              |
| Otu00454 | k                                                                                                       | Fungi(61);p  | Basidiomycota(61);c       | unclassified Basidiomycota(61);o       | unclassified Basidiomycota(61);f          | unclassified Basidiomycota(61);g             | unclassified Basidiomycota(61);s    | Basidiomycota_sp(61);                  |
| Otu00455 | k                                                                                                       | Fungi(100);p | Basidiomycota(100);c      | Agaricomycetes(100);o                  | Polyporales(100);f                        | unclassified Polyporales(100);g              | unclassified Polyporales(100);s     | Polyporales_sp(100);                   |
| Otu00456 | k                                                                                                       | Fungi(100);p | Ascomycota(100);c         | Leotiomycetes(100);o                   | Helotiales(100);f                         | Dermateaceae(100);g                          | Phaeomollisia(100);s                | Phaeomollisia piceae(100);             |
| Otu00457 | k                                                                                                       | Fungi(100);p | Basidiomycota(100);c      | Agaricomycetes(100);o                  | Thelephorales(100);f                      | Thelephoraceae(100);g                        | Tomentellopsis(100);s               | Tomentellopsis_sp(100);                |
| Otu00458 | unknown(100);unclassified(100);unclassified(100);unclassified(100);unclassified(100);unclassified(100); |              |                           |                                        |                                           |                                              |                                     |                                        |
| Otu00459 | k                                                                                                       | Fungi(95);p  | Ascomycota(93);c          | Sordariomycetes(83);o                  | Ophiostomatales(83);f                     | Ophiostomataceae(83);g                       | Ophiostoma(83);s                    | Ophiostoma denticiliatum(83);          |
| Otu00460 | k                                                                                                       | Fungi(100);p | Ascomycota(100);c         | Leotiomycetes(100);o                   | Helotiales(100);f                         | Helotiales family Incertae sedis(100);g      | Hyphodiscus(100);s                  | Hyphodiscus hymeniophilus(100);        |
| Otu00461 | k                                                                                                       | Fungi(100);p | Basidiomycota(100);c      | Agaricomycetes(100);o                  | Agaricales(100);f                         | Cortinariaceae(100);g                        | Cortinarius(100);s                  | Cortinarius testaceofolius(100);       |
| Otu00462 | k                                                                                                       | Fungi(100);p | Ascomycota(100);c         | Leotiomycetes(100);o                   | Helotiales(100);f                         | unclassified Helotiales(100);g               | unclassified Helotiales(100);s      | Helotiales_sp(100);                    |
| Otu00463 | k                                                                                                       | Fungi(100);p | Basidiomycota(100);c      | Agaricomycetes(100);o                  | Agaricales(100);f                         | unclassified Agaricales(99);g                | unclassified Agaricales(99);s       | Agaricales_sp(99);                     |
| Otu00464 | k                                                                                                       | Fungi(61);p  | Ascomycota(61);c          | Saccharomycetes(61);o                  | Saccharomycetales(61);f                   | Dipodascaceae(61);g                          | Basidioascus(61);s                  | Basidioascus magus(61);                |
| Otu00465 | k                                                                                                       | Fungi(65);p  | Chytridiomycota(65);c     | Chytridiomycetes(65);o                 | Chytridiales(65);f                        | Chytridiales family Incertae sedis(65);g     | Avachytrium(65);s                   | Avachytrium platense(65);              |
| Otu00466 | k                                                                                                       | Fungi(100);p | Basidiomycota(100);c      | Agaricomycetes(100);o                  | Agaricales(100);f                         | unclassified Agaricales(100);g               | unclassified Agaricales(100);s      | Agaricales_sp(100);                    |
| Otu00467 | k                                                                                                       | Fungi(100);p | Basidiomycota(100);c      | Microbotryomycetes(100);o              | Sporidiobolales(100);f                    | Sporidiobolales family Incertae sedis(100);g | Rhodotorula(100);s                  | Rhodotorula_sp_MLB_I(100);             |
| Otu00468 | k                                                                                                       | Fungi(85);p  | Ascomycota(81);c          | Lecanoromycetes(81);o                  | Pertusariales(81);f                       | Icmadophlaccaceae(81);g                      | Thamnia(81);s                       | Thamnia vermicularis(81);              |

Supplementary, TableS1A  
 Taxonomy of OTUs  
 Normalized data, identification according to blast UNITEv57

|          |                                                                                                                    |              |                           |                                        |                                             |                                              |                                      |                                                               |
|----------|--------------------------------------------------------------------------------------------------------------------|--------------|---------------------------|----------------------------------------|---------------------------------------------|----------------------------------------------|--------------------------------------|---------------------------------------------------------------|
| Otu00469 | k                                                                                                                  | Fungi(100);p | Basidiomycota(100);c      | Agaricomycetes(100);o                  | Telephorales(100);f                         | Telephoraceae(100);g                         | unclassified_Telephoraceae(100);s    | Telephoraceae_sp(100);                                        |
| Otu00470 | k                                                                                                                  | Fungi(100);p | Basidiomycota(100);c      | Agaricomycetes(100);o                  | Hymenochaetales(100);f                      | Schizoporceae(100);g                         | Xylodon(100);s                       | Xylodon_nesporii(100);                                        |
| Otu00471 | k                                                                                                                  | Fungi(100);p | Ascomycota(100);c         | Ascomycetes(100);o                     | Leotiomyces_order_Incertae_sedis(100);f     | Leotiomyces_family_Incertae_sedis(100);g     | Collophora(100);s                    | Collophora_sp(100);                                           |
| Otu00472 | k                                                                                                                  | Fungi(100);p | Basidiomycota(100);c      | Agaricomycetes(100);o                  | Russulales(100);f                           | Russulaceae(100);g                           | Russula(100);s                       | Russula_vinosordida(100);                                     |
| Otu00473 | k                                                                                                                  | Fungi(100);p | Ascomycota(100);c         | Dothideomycetes(100);o                 | Dothideomycetes_order_Incertae_sedis(100);f | Myxotrichaceae(100);g                        | Oidiodendron(100);s                  | Oidiodendron_maius(100);                                      |
| Otu00474 | k                                                                                                                  | Fungi(100);p | Ascomycota(100);c         | Leotiomyces(94);o                      | Helotiales(94);f                            | unclassified_Helotiales(94);g                | unclassified_Helotiales(94);s        | Helotiales_sp(94);                                            |
| Otu00475 | k                                                                                                                  | Fungi(100);p | Ascomycota(100);c         | Dothideomycetes(100);o                 | Dothideomycetes_order_Incertae_sedis(100);f | Myxotrichaceae(100);g                        | Oidiodendron(100);s                  | Oidiodendron_echinulatum(100);                                |
| Otu00476 | k                                                                                                                  | Fungi(100);p | Basidiomycota(100);c      | Agaricomycetes(100);o                  | Atheliales(100);f                           | Atheliaceae(100);g                           | Piloderma(100);s                     | Piloderma_oliveaceum(100);                                    |
| Otu00477 | k                                                                                                                  | Fungi(100);p | unclassified_Fungi(100);c | unclassified_Fungi(100);o              | unclassified_Fungi(100);f                   | unclassified_Fungi(100);g                    | unclassified_Fungi(100);s            | Cortinarius_caesiobrunneus_KytÄ¶lv., Niskanen & Liimat.(100); |
| Otu00478 | k                                                                                                                  | Fungi(100);p | Basidiomycota(100);c      | Agaricomycetes(100);o                  | unclassified_Agaricomycetes(100);f          | unclassified_Agaricomycetes(100);g           | unclassified_Agaricomycetes(100);s   | Agaricomycetes_sp(100);                                       |
| Otu00479 | k                                                                                                                  | Fungi(100);p | Basidiomycota(100);c      | Agaricomycetes(100);o                  | Auriculariales(100);f                       | Auriculariales_family_Incertae_sedis(100);g  | Basidiodendron(100);s                | Basidiodendron_caesiocinereum(100);                           |
| Otu00480 | k                                                                                                                  | Fungi(100);p | Ascomycota(100);c         | Sordariomycetes(100);o                 | Hypocreales(100);f                          | Hypocreales_family_Incertae_sedis(100);g     | Calcarisporium(100);s                | Calcarisporium_sp(100);                                       |
| Otu00481 | k                                                                                                                  | Fungi(100);p | Zygomycota(100);c         | Zygomycota_class_Incertae_sedis(100);o | Mucorales(100);f                            | Umbelopsidaceae(100);g                       | Umbelopsis(100);s                    | Umbelopsis_sp(100);                                           |
| Otu00482 | k                                                                                                                  | Fungi(100);p | Basidiomycota(100);c      | Agaricomycetes(100);o                  | Trechisporales(100);f                       | unclassified_Trechisporales(100);g           | unclassified_Trechisporales(100);s   | Trechisporales_sp(100);                                       |
| Otu00483 | k                                                                                                                  | Fungi(100);p | Basidiomycota(100);c      | Agaricomycetes(100);o                  | Telephorales(100);f                         | Telephoraceae(100);g                         | Tomentella(100);s                    | Tomentella_sp(100);                                           |
| Otu00484 | k                                                                                                                  | Fungi(83);p  | Ascomycota(83);c          | Sordariomycetes(83);o                  | Ophiostomatales(83);f                       | Ophiostomataceae(83);g                       | Leptographium(83);s                  | Leptographium_piriforme(83);                                  |
| Otu00485 | k                                                                                                                  | Fungi(100);p | Ascomycota(100);c         | Dothideomycetes(100);o                 | Dothideomycetes_order_Incertae_sedis(100);f | Myxotrichaceae(100);g                        | Oidiodendron(100);s                  | Oidiodendron_pilicola(100);                                   |
| Otu00486 | unknown(100);unclassified(100);unclassified(100);unclassified(100);unclassified(100);unclassified(100);            |              |                           |                                        |                                             |                                              |                                      |                                                               |
| Otu00487 | k                                                                                                                  | Fungi(100);p | Ascomycota(100);c         | Eurotiomycetes(100);o                  | Chaetothyriales(100);f                      | Chaetothyriales(100);g                       | unclassified_Chaetothyriales(79);s   | Chaetothyriales_sp(79);                                       |
| Otu00488 | k                                                                                                                  | Fungi(100);p | Ascomycota(100);c         | Eurotiomycetes(100);o                  | Chaetothyriales(100);f                      | Herpotrichiellaceae(100);g                   | Exophiala(100);s                     | Exophiala_sp(100);                                            |
| Otu00489 | k                                                                                                                  | Fungi(100);p | Basidiomycota(100);c      | Agaricomycetes(100);o                  | Trechisporales(100);f                       | Hydnodontaceae(100);g                        | unclassified_Hydnodontaceae(100);s   | Hydnodontaceae_sp(100);                                       |
| Otu00490 | k                                                                                                                  | Fungi(100);p | Ascomycota(100);c         | Sordariomycetes(100);o                 | Ophiostomatales(100);f                      | Ophiostomataceae(100);g                      | Ophiostoma(100);s                    | Ophiostoma_cf_rectangulosporium_1039RJP(100);                 |
| Otu00492 | k                                                                                                                  | Fungi(100);p | Ascomycota(100);c         | Eurotiomycetes(100);o                  | Eurotiales(100);f                           | Trichocomaceae(100);g                        | unclassified_Trichocomaceae(100);s   | Trichocomaceae_sp(100);                                       |
| Otu00493 | k                                                                                                                  | Fungi(100);p | Zygomycota(100);c         | Zygomycota_class_Incertae_sedis(100);o | Mucorales(100);f                            | Umbelopsidaceae(100);g                       | Umbelopsis(100);s                    | Umbelopsis_ovata(55);                                         |
| Otu00494 | k                                                                                                                  | Fungi(100);p | Ascomycota(100);c         | Dothideomycetes(100);o                 | Dothideomycetes_order_Incertae_sedis(100);f | Pseudeurotiaceae(100);g                      | unclassified_Pseudeurotiaceae(100);s | Pseudeurotiaceae_sp(100);                                     |
| Otu00495 | k                                                                                                                  | Fungi(100);p | unclassified_Fungi(73);c  | unclassified_Fungi(73);o               | unclassified_Fungi(73);f                    | unclassified_Fungi(73);g                     | unclassified_Fungi(73);s             | Fungi_sp(73);                                                 |
| Otu00496 | k                                                                                                                  | Fungi(100);p | Basidiomycota(100);c      | Agaricomycetes(100);o                  | Russulales(100);f                           | Russulaceae(100);g                           | Russula(91);s                        | Russula_sp(91);                                               |
| Otu00497 | k                                                                                                                  | Fungi(100);p | Ascomycota(100);c         | Leotiomyces(100);o                     | Helotiales(100);f                           | unclassified_Helotiales(100);g               | unclassified_Helotiales(100);s       | Helotiales_sp(100);                                           |
| Otu00498 | k                                                                                                                  | Fungi(62);p  | Ascomycota(62);c          | Sordariomycetes(62);o                  | Ophiostomatales(62);f                       | Ophiostomataceae(62);g                       | Leptographium(62);s                  | Leptographium_piriforme(62);                                  |
| Otu00499 | k                                                                                                                  | Fungi(100);p | Basidiomycota(100);c      | Microbotryomycetes(100);o              | Sporidiobolales(100);f                      | unclassified_Sporidiobolales(100);g          | unclassified_Sporidiobolales(100);s  | Sporidiobolales_sp(100);                                      |
| Otu00500 | k                                                                                                                  | Fungi(98);p  | Basidiomycota(98);c       | Agaricomycetes(98);o                   | Polyporales(98);f                           | Meruliaceae(98);g                            | Hyphoderma(98);s                     | Hyphoderma_subsetigerum(98);                                  |
| Otu00501 | k                                                                                                                  | Fungi(96);p  | unclassified_Fungi(96);c  | unclassified_Fungi(96);o               | unclassified_Fungi(96);f                    | unclassified_Fungi(96);g                     | unclassified_Fungi(96);s             | Fungi_sp(96);                                                 |
| Otu00502 | k                                                                                                                  | Fungi(100);p | Basidiomycota(100);c      | Agaricomycetes(100);o                  | Agaricales(100);f                           | unclassified_Agaricales(98);g                | unclassified_Agaricales(98);s        | Agaricales_sp(98);                                            |
| Otu00503 | k                                                                                                                  | Fungi(100);p | Basidiomycota(100);c      | Agaricomycetes(100);o                  | Telephorales(100);f                         | Telephoraceae(100);g                         | Tomentella(100);s                    | Tomentella_subclavigera(100);                                 |
| Otu00504 | k                                                                                                                  | Fungi(91);p  | Basidiomycota(91);c       | Agaricomycetes(91);o                   | Hymenochaetales(84);f                       | Hymenochaetales(84);g                        | Tubulicrinis(84);s                   | Tubulicrinis_sp(84);                                          |
| Otu00505 | k                                                                                                                  | Fungi(100);p | Basidiomycota(100);c      | Agaricomycetes(100);o                  | Telephorales(100);f                         | Telephoraceae(100);g                         | Tomentella(100);s                    | Tomentella_sp(100);                                           |
| Otu00506 | k                                                                                                                  | Fungi(100);p | Basidiomycota(100);c      | Agaricomycetes(100);o                  | Trechisporales(100);f                       | Hydnodontaceae(93);g                         | Trechispora(93);s                    | Trechispora_sp(93);                                           |
| Otu00507 | k                                                                                                                  | Fungi(100);p | Zygomycota(100);c         | Zygomycota_class_Incertae_sedis(100);o | Mortierellales(100);f                       | unclassified_Mortierellales(100);g           | unclassified_Mortierellales(100);s   | Mortierellales_sp(100);                                       |
| Otu00508 | k                                                                                                                  | Fungi(100);p | Basidiomycota(100);c      | unclassified_Basidiomycota(100);o      | unclassified_Basidiomycota(100);f           | unclassified_Basidiomycota(100);g            | unclassified_Basidiomycota(100);s    | Basidiomycota_sp(100);                                        |
| Otu00509 | k                                                                                                                  | Fungi(100);p | Ascomycota(100);c         | Dothideomycetes(100);o                 | Capnodiales(100);f                          | unclassified_Capnodiales(100);g              | unclassified_Capnodiales(100);s      | Capnodiales_sp(100);                                          |
| Otu00510 | unknown(59);unclassified(59);unclassified(59);unclassified(59);unclassified(59);unclassified(59);unclassified(59); |              |                           |                                        |                                             |                                              |                                      |                                                               |
| Otu00511 | k                                                                                                                  | Fungi(100);p | Ascomycota(100);c         | Leotiomyces(96);o                      | Helotiales(96);f                            | Helotiales_family_Incertae_sedis(96);g       | Scytalidium(96);s                    | Scytalidium_sp(96);                                           |
| Otu00512 | k                                                                                                                  | Fungi(100);p | Ascomycota(100);c         | Dothideomycetes(100);o                 | Dothideomycetes_order_Incertae_sedis(100);f | Myxotrichaceae(100);g                        | Oidiodendron(100);s                  | Oidiodendron_rhodogenum(79);                                  |
| Otu00513 | k                                                                                                                  | Fungi(100);p | Ascomycota(100);c         | Eurotiomycetes(100);o                  | Chaetothyriales(100);f                      | Herpotrichiellaceae(100);g                   | Cladophialophora(100);s              | Cladophialophora_sp(100);                                     |
| Otu00514 | k                                                                                                                  | Fungi(88);p  | Ascomycota(88);c          | Pezizales(83);o                        | Pezizales(83);f                             | Tuberaceae(83);g                             | Tuber(83);s                          | Tuber_sp(83);                                                 |
| Otu00515 | k                                                                                                                  | Fungi(100);p | Ascomycota(100);c         | Leotiomyces(100);o                     | Helotiales(100);f                           | unclassified_Helotiales(100);g               | unclassified_Helotiales(100);s       | Helotiales_sp(100);                                           |
| Otu00516 | k                                                                                                                  | Fungi(100);p | Ascomycota(100);c         | Leotiomyces(100);o                     | Helotiales(100);f                           | unclassified_Helotiales(100);g               | unclassified_Helotiales(100);s       | Helotiales_sp(100);                                           |
| Otu00517 | k                                                                                                                  | Fungi(100);p | Basidiomycota(100);c      | Agaricomycetes(100);o                  | Boletales(100);f                            | Boletaceae(100);g                            | Leccinum(100);s                      | Leccinum_varicolor(100);                                      |
| Otu00518 | k                                                                                                                  | Fungi(100);p | unclassified_Fungi(100);c | unclassified_Fungi(100);o              | unclassified_Fungi(100);f                   | unclassified_Fungi(100);g                    | unclassified_Fungi(100);s            | Fungi_sp(100);                                                |
| Otu00519 | k                                                                                                                  | Fungi(100);p | unclassified_Fungi(100);c | unclassified_Fungi(100);o              | unclassified_Fungi(100);f                   | unclassified_Fungi(100);g                    | unclassified_Fungi(100);s            | Fungi_sp(100);                                                |
| Otu00520 | k                                                                                                                  | Fungi(100);p | Basidiomycota(100);c      | Agaricomycetes(100);o                  | Polyporales(100);f                          | Polyporaceae(100);g                          | Rhodonia(100);s                      | Rhodonia_placenta(100);                                       |
| Otu00521 | k                                                                                                                  | Fungi(100);p | Zygomycota(100);c         | Zygomycota_class_Incertae_sedis(100);o | Mortierellales(100);f                       | Mortierellaceae(100);g                       | Mortierella(100);s                   | Mortierella_sp(100);                                          |
| Otu00522 | k                                                                                                                  | Fungi(100);p | Basidiomycota(100);c      | Agaricomycetes(100);o                  | Agaricales(100);f                           | Marasmiaceae(100);g                          | Micromphale(100);s                   | Micromphale_perforans(100);                                   |
| Otu00523 | k                                                                                                                  | Fungi(100);p | Ascomycota(100);c         | Leotiomyces(100);o                     | Helotiales(100);f                           | unclassified_Helotiales(88);g                | unclassified_Helotiales(88);s        | Helotiales_sp(88);                                            |
| Otu00524 | k                                                                                                                  | Fungi(100);p | Ascomycota(100);c         | Dothideomycetes(100);o                 | Capnodiales(100);f                          | unclassified_Capnodiales(88);g               | unclassified_Capnodiales(88);s       | Capnodiales_sp(88);                                           |
| Otu00525 | k                                                                                                                  | Fungi(100);p | Basidiomycota(100);c      | Agaricomycetes(100);o                  | Agaricales(100);f                           | Cortinariaceae(100);g                        | Cortinarius(100);s                   | Cortinarius_gentilis(100);                                    |
| Otu00526 | k                                                                                                                  | Fungi(100);p | Basidiomycota(100);c      | Agaricomycetes(100);o                  | Hymenochaetales(100);f                      | Hymenochaetales(100);g                       | Onnia(100);s                         | Onnia_tomentosa(100);                                         |
| Otu00527 | k                                                                                                                  | Fungi(98);p  | Basidiomycota(98);c       | Agaricomycetes(98);o                   | Atheliales(98);f                            | Atheliaceae(98);g                            | unclassified_Atheliaceae(95);s       | Atheliaceae_sp(95);                                           |
| Otu00528 | k                                                                                                                  | Fungi(93);p  | Ascomycota(93);c          | Sordariomycetes(93);o                  | Ophiostomatales(93);f                       | Ophiostomataceae(93);g                       | Leptographium(93);s                  | Leptographium_piriforme(93);                                  |
| Otu00529 | k                                                                                                                  | Fungi(100);p | Zygomycota(100);c         | Zygomycota_class_Incertae_sedis(100);o | Mortierellales(100);f                       | Mortierellaceae(100);g                       | Mortierella(100);s                   | Mortierella_parvispora(100);                                  |
| Otu00530 | k                                                                                                                  | Fungi(100);p | Ascomycota(100);c         | Sordariomycetes(100);o                 | unclassified_Sordariomycetes(100);f         | unclassified_Sordariomycetes(100);g          | unclassified_Sordariomycetes(100);s  | Sordariomycetes_sp(100);                                      |
| Otu00531 | k                                                                                                                  | Fungi(100);p | Basidiomycota(100);c      | Microbotryomycetes(100);o              | Sporidiobolales(100);f                      | Sporidiobolales_family_Incertae_sedis(100);g | Rhodotorula(100);s                   | Rhodotorula_auriculariae(100);                                |
| Otu00532 | k                                                                                                                  | Fungi(100);p | Ascomycota(100);c         | Leotiomyces(100);o                     | Helotiales(100);f                           | Helotiaceae(100);g                           | unclassified_Helotiaceae(100);s      | Helotiaceae_sp(100);                                          |
| Otu00533 | k                                                                                                                  | Fungi(100);p | Ascomycota(100);c         | Ascomycota_class_Incertae_sedis(100);o | Ascomycota_order_Incertae_sedis(100);f      | Ascomycota_family_Incertae_sedis(100);g      | Chalara(100);s                       | Chalara_hyalocuspica(100);                                    |
| Otu00534 | k                                                                                                                  | Fungi(100);p | Ascomycota(100);c         | Leotiomyces(100);o                     | Helotiales(100);f                           | Helotiaceae(100);g                           | Rhizoscyphus(100);s                  | Rhizoscyphus_sp(100);                                         |
| Otu00535 | k                                                                                                                  | Fungi(100);p | unclassified_Fungi(100);c | unclassified_Fungi(100);o              | unclassified_Fungi(100);f                   | unclassified_Fungi(100);g                    | unclassified_Fungi(100);s            | Fungi_sp(100);                                                |



Supplementary, TableS1A  
 Taxonomy of OTUs  
 Normalized data, identification according to blast UNITEv57

|          |                                                                                                                                                                                              |
|----------|----------------------------------------------------------------------------------------------------------------------------------------------------------------------------------------------|
| Otu00536 | unknown(100);unclassified(100);unclassified(100);unclassified(100);unclassified(100);unclassified(100);unclassified(100);                                                                    |
| Otu00537 | k Fungi(100);p Ascomycota(100);c Sordariomycetes(100);o Hypocreales(100);f Nectriaceae(100);g Fusarium(100);s Fusarium_sp(100);                                                              |
| Otu00538 | k Fungi(100);p Basidiomycota(100);c Agaricomycetes(100);o Polyporales(100);f Polyporaceae(100);g Skeletocutis(100);s Skeletocutis_diluta(100);                                               |
| Otu00539 | k Fungi(100);p Ascomycota(100);c Leotiomyces(100);o Helotiales(100);f Hyaloscyphaeae(100);g unclassified_Hyaloscyphaeae(100);s Hyaloscyphaeae_sp_I_GK_2010(100);                             |
| Otu00540 | k Fungi(100);p Zygomycota(100);c Zygomycota class Incertae sedis(100);o Mortierellales(100);f Mortierellaceae(100);g Mortierella(100);s Mortierella_sp_WD32A(100);                           |
| Otu00541 | unknown(63);unclassified(63);unclassified(63);unclassified(63);unclassified(63);unclassified(63);                                                                                            |
| Otu00542 | k Fungi(79);p Basidiomycota(79);c Pucciniomycetes(79);o Pucciniales(79);f Pucciniaceae(79);g Gymnosporangium(79);s Gymnosporangium_globosum(79);                                             |
| Otu00543 | k Fungi(100);p Basidiomycota(100);c Dacrymycetes(100);o Dacrymycetales(100);f Dacrymycetaceae(100);g unclassified_Dacrymycetaceae(100);s Dacrymycetaceae_sp(100);                            |
| Otu00544 | k Fungi(95);p Basidiomycota(95);c Agaricomycetes(95);o Agaricales(95);f Mycenaceae(95);g Hemimycena(95);s Hemimycena_cucullata(95);                                                          |
| Otu00545 | k Fungi(100);p Ascomycota(100);c Eurotiomycetes(100);o Chaetothyriales(100);f Herpotrichiellaceae(100);g Cladophialophora(100);s Cladophialophora_sp(100);                                   |
| Otu00546 | k Fungi(100);p Basidiomycota(100);c Agaricomycetes(100);o Agaricales(100);f Psathyrellaceae(98);g Parasola(98);s Parasola_schroeterii(98);                                                   |
| Otu00547 | k Fungi(100);p Basidiomycota(100);c Agaricomycetes(100);o Thelephorales(100);f Thelephoraceae(100);g Pseudotomentella(100);s Pseudotomentella_sp(100);                                       |
| Otu00548 | k Fungi(100);p Ascomycota(100);c Leotiomyces(100);o Helotiales(100);f unclassified_Helotiales(100);g unclassified_Helotiales(100);s Helotiales_sp(100);                                      |
| Otu00550 | k Fungi(100);p unclassified Fungi(100);c unclassified Fungi(100);o unclassified Fungi(100);f unclassified Fungi(100);g unclassified Fungi(100);s Fungi_sp(100);                              |
| Otu00551 | k Fungi(100);p unclassified Fungi(100);c unclassified Fungi(100);o unclassified Fungi(100);f unclassified Fungi(100);g unclassified Fungi(100);s Fungi_sp(100);                              |
| Otu00552 | k Fungi(92);p Basidiomycota(92);c Agaricomycetes(89);o Hymenochaetales(81);f Hymenochaetaceae(81);g Inonotus(81);s Inonotus_hispidus(81);                                                    |
| Otu00553 | k Fungi(78);p Ascomycota(78);c Sordariomycetes(59);o Chaetosphaeriales(59);f Chaetosphaeriaceae(59);g Chloridium(59);s Chloridium_sp(59);                                                    |
| Otu00554 | k Fungi(100);p Ascomycota(100);c Leotiomyces(100);o Helotiales(100);f unclassified_Helotiales(95);g unclassified_Helotiales(95);s Helotiales_sp(95);                                         |
| Otu00555 | k Fungi(98);p Basidiomycota(98);c Dacrymycetes(98);o Dacrymycetales(98);f Dacrymycetaceae(98);g unclassified_Dacrymycetaceae(98);s Dacrymycetaceae_sp(98);                                   |
| Otu00556 | k Fungi(100);p Ascomycota(100);c Leotiomyces(100);o Helotiales(100);f unclassified_Helotiales(100);g unclassified_Helotiales(100);s Helotiales_sp(100);                                      |
| Otu00557 | k Fungi(100);p Basidiomycota(100);c Agaricomycetes(100);o Trechisporales(100);f Hydnodontaceae(100);g Trechispora(100);s Trechispora_sp(100);                                                |
| Otu00558 | k Fungi(100);p Basidiomycota(100);c Dacrymycetes(100);o Dacrymycetales(100);f Dacrymycetaceae(100);g Cerinosterus(100);s Cerinosterus_sp(100);                                               |
| Otu00559 | k Fungi(100);p Basidiomycota(100);c Agaricomycetes(100);o Hymenochaetales(89);f Hymenochaetaceae(89);g Tubulicrinis(89);s Tubulicrinis_sp(89);                                               |
| Otu00560 | k Fungi(100);p Ascomycota(100);c Dothideomycetes(100);o Dothideomycetes order Incertae sedis(100);f Pseudeurotiaceae(100);g unclassified_Pseudeurotiaceae(100);s Pseudeurotiaceae_sp(100);   |
| Otu00561 | k Fungi(100);p Basidiomycota(100);c Agaricomycetes(100);o Agaricales(100);f Cortinariaceae(100);g Cortinarius(100);s Cortinarius_umbrinolens(86);                                            |
| Otu00562 | k Fungi(100);p Basidiomycota(100);c Agaricomycetes(100);o Polyporales(100);f Fomitopsidaceae(100);g Antrodia(100);s Antrodia_serialis(100);                                                  |
| Otu00563 | k Fungi(100);p Zygomycota(100);c Zygomycota class Incertae sedis(100);o Mucorales(100);f Umbelopsidaceae(100);g Umbelopsis(100);s Umbelopsis_ramanniana(95);                                 |
| Otu00564 | k Fungi(100);p Basidiomycota(100);c Agaricomycetes(100);o Russulales(100);f Peniophoraceae(100);g Gloiothete(100);s Gloiothete_citrina(100);                                                 |
| Otu00565 | k Fungi(100);p Basidiomycota(100);c Agaricomycetes(100);o Agaricales(100);f Cortinariaceae(100);g Cortinarius(100);s Cortinarius_vanduzerensis(100);                                         |
| Otu00566 | k Fungi(100);p Ascomycota(100);c Sordariomycetes(100);o unclassified_Sordariomycetes(98);f unclassified_Sordariomycetes(98);g unclassified_Sordariomycetes(98);s Sordariomycetes_sp(98);     |
| Otu00567 | k Fungi(100);p Ascomycota(100);c Leotiomyces(100);o unclassified_Leotiomyces(100);f unclassified_Leotiomyces(100);g unclassified_Leotiomyces(100);s Leotiomyces_sp(100);                     |
| Otu00568 | k Fungi(100);p Basidiomycota(100);c Agaricomycetes(100);o Russulales(100);f Russulaceae(100);g Lactifluus(100);s Lactifluus_bertillonii(100);                                                |
| Otu00569 | k Fungi(100);p Ascomycota(100);c Sordariomycetes(100);o Coniochaetales(100);f Coniochaetaceae(100);g unclassified_Coniochaetaceae(100);s Coniochaetaceae_sp(100);                            |
| Otu00570 | k Fungi(100);p Basidiomycota(100);c Agaricomycetes(100);o Auriculariales(100);f Auriculariales family Incertae sedis(100);g Basidiodendron(100);s Basidiodendron_caesiocinereum(100);        |
| Otu00571 | k Fungi(100);p Basidiomycota(100);c Agaricomycetes(100);o Agaricales(100);f unclassified_Agaricales(100);g unclassified_Agaricales(100);s Agaricales_sp(100);                                |
| Otu00572 | k Fungi(100);p Ascomycota(100);c unclassified_Ascmycota(100);o unclassified_Ascmycota(100);f unclassified_Ascmycota(100);g unclassified_Ascmycota(100);s Ascomycota_sp(100);                 |
| Otu00573 | k Fungi(100);p Basidiomycota(100);c Agaricomycetes(100);o Russulales(100);f Russulaceae(100);g Gymnomyces(64);s Gymnomyces_monosporus(64);                                                   |
| Otu00574 | k Fungi(100);p Basidiomycota(100);c Tremellomycetes(73);o Filobasidiales(73);f Filobasidiaceae(73);g Cryptococcus(73);s Cryptococcus_liquefaciens(73);                                       |
| Otu00575 | k Fungi(100);p Basidiomycota(100);c Agaricomycetes(100);o Agaricales(100);f unclassified_Agaricales(85);g unclassified_Agaricales(85);s Agaricales_sp(85);                                   |
| Otu00576 | k Fungi(100);p Basidiomycota(100);c Agaricomycetes(100);o Boletales(100);f Boletaceae(100);g Leccinum(100);s Leccinum_sp(100);                                                               |
| Otu00577 | unknown(100);unclassified(100);unclassified(100);unclassified(100);unclassified(100);unclassified(100);unclassified(100);                                                                    |
| Otu00578 | k Fungi(100);p Zygomycota(100);c Zygomycota class Incertae sedis(100);o Mortierellales(100);f Mortierellaceae(100);g Mortierella(100);s Mortierella_sp(97);                                  |
| Otu00579 | k Fungi(100);p Basidiomycota(100);c Agaricomycetes(100);o Auriculariales(100);f Auriculariales family Incertae sedis(100);g Basidiodendron(100);s Basidiodendron_caesiocinereum(100);        |
| Otu00580 | k Fungi(100);p Basidiomycota(100);c Agaricomycetes(100);o Agaricales(100);f Cortinariaceae(100);g Cortinarius(100);s Cortinarius_evernius(100);                                              |
| Otu00581 | k Fungi(100);p Basidiomycota(100);c Agaricomycetes(100);o Hymenochaetales(100);f Schizoporaaceae(100);g Hyphodontia(100);s Hyphodontia_alutacea(100);                                        |
| Otu00582 | k Fungi(100);p Ascomycota(100);c Leotiomyces(100);o Helotiales(100);f unclassified_Helotiales(100);g unclassified_Helotiales(100);s Helotiales_sp(100);                                      |
| Otu00583 | k Fungi(100);p Ascomycota(100);c Sordariomycetes(100);o Hypocreales(100);f Cordycipitaceae(100);g Lecanicillium(100);s Lecanicillium_flavidum(100);                                          |
| Otu00584 | k Fungi(100);p Basidiomycota(100);c Agaricomycetes(100);o Thelephorales(100);f Thelephoraceae(100);g Tomentella(100);s Tomentella_sp(100);                                                   |
| Otu00585 | unknown(100);unclassified(100);unclassified(100);unclassified(100);unclassified(100);unclassified(100);unclassified(100);                                                                    |
| Otu00586 | k Fungi(100);p Basidiomycota(100);c Agaricomycetes(100);o Thelephorales(100);f Thelephoraceae(100);g unclassified_Thelephoraceae(100);s Thelephoraceae_sp(100);                              |
| Otu00587 | k Fungi(100);p Basidiomycota(100);c Agaricomycetes(100);o Thelephorales(100);f Thelephoraceae(100);g Tomentella(100);s Tomentella_lapida(100);                                               |
| Otu00588 | k Fungi(97);p Ascomycota(97);c Eurotiomycetes(97);o Verrucariales(97);f Verrucariaceae(97);g Dermatocarpon(97);s Dermatocarpon_dolomiticum(97);                                              |
| Otu00589 | unknown(97);unclassified(97);unclassified(97);unclassified(97);unclassified(97);unclassified(97);unclassified(97);                                                                           |
| Otu00590 | k Fungi(100);p Basidiomycota(100);c Agaricomycetes(100);o Russulales(100);f Russulaceae(100);g Lactarius(100);s Lactarius_sp(100);                                                           |
| Otu00591 | k Fungi(100);p Basidiomycota(100);c Agaricomycetes(100);o Trechisporales(71);unclassified(100);unclassified(100);unclassified(100);                                                          |
| Otu00592 | k Fungi(100);p Ascomycota(100);c Dothideomycetes(100);o Capnodiales(100);f Mycosphaerellaceae(100);g unclassified_Mycosphaerellaceae(100);s Mycosphaerellaceae_sp(100);                      |
| Otu00593 | k Fungi(100);p Zygomycota(100);c Zygomycota class Incertae sedis(100);o Mucorales(100);f Umbelopsidaceae(100);g Umbelopsis(100);s Umbelopsis_dimorpha(100);                                  |
| Otu00594 | k Fungi(100);p Zygomycota(100);c Zygomycota class Incertae sedis(100);o Mortierellales(100);f Mortierellaceae(100);g Mortierella(100);s Mortierella_kuhlmanii(84);                           |
| Otu00595 | k Fungi(100);p Ascomycota(100);c Leotiomyces(100);o Helotiales(100);f unclassified_Helotiales(100);g unclassified_Helotiales(100);s Helotiales_sp(100);                                      |
| Otu00596 | k Fungi(100);p Zygomycota(100);c Zygomycota class Incertae sedis(100);o Mucorales(100);f Mucoraceae(100);g Mucor(100);s Mucor_silvaticus(100);                                               |
| Otu00597 | k Fungi(100);p Ascomycota(100);c Sordariomycetes(100);o unclassified_Sordariomycetes(100);f unclassified_Sordariomycetes(100);g unclassified_Sordariomycetes(100);s Sordariomycetes_sp(100); |
| Otu00598 | k Fungi(100);p Ascomycota(100);c Eurotiomycetes(100);o Chaetothyriales(100);f unclassified_Chaetothyriales(100);g unclassified_Chaetothyriales(100);s Chaetothyriales_sp(100);               |
| Otu00599 | k Fungi(100);p Basidiomycota(100);c Microbotryomycetes(100);o Sporidiobolales(100);f Sporidiobolales family Incertae sedis(100);g Rhodotorula(100);s Rhodotorula_sp(100);                    |
| Otu00600 | k Fungi(100);p Ascomycota(100);c Dothideomycetes(100);o Capnodiales(100);f Davidiellaceae(100);g Cladosporium(100);s Cladosporium_sp(100);                                                   |
| Otu00601 | k Fungi(100);p Ascomycota(100);c Archaeorhizomycetes(100);o Archaeorhizomycetales(100);f Archaeorhizomycetaceae(100);g Archaeorhizomyces(100);s Archaeorhizomyces_sp(100);                   |
| Otu00602 | k Fungi(100);p Basidiomycota(100);c Agaricomycetes(100);o Russulales(100);f Russulaceae(100);g Lactarius(100);s Lactarius_helvus(100);                                                       |

Supplementary, TableS1A  
 Taxonomy of OTUs  
 Normalized data, identification according to blast UNITEv57

|          |                                                                                                                           |              |                           |                                        |                                             |                                              |                                         |                                 |
|----------|---------------------------------------------------------------------------------------------------------------------------|--------------|---------------------------|----------------------------------------|---------------------------------------------|----------------------------------------------|-----------------------------------------|---------------------------------|
| Otu00603 | k                                                                                                                         | Fungi(100);p | Ascomycota(100);c         | Dothideomycetes(100);o                 | Capnodiales(100);f                          | Davidiellaceae(100);g                        | Cladosporium(100);s                     | Cladosporium_sp_CBS_55279(100); |
| Otu00604 | k                                                                                                                         | Fungi(100);p | Basidiomycota(100);c      | Agaricomycetes(100);o                  | Atheliales(100);f                           | Atheliales(100);g                            | Fibulorhizoctonia(97);s                 | Fibulorhizoctonia_sp(97);       |
| Otu00605 | unknown(100);unclassified(100);unclassified(100);unclassified(100);unclassified(100);unclassified(100);                   |              |                           |                                        |                                             |                                              |                                         |                                 |
| Otu00606 | unknown(100);unclassified(100);unclassified(100);unclassified(100);unclassified(100);unclassified(100);unclassified(100); |              |                           |                                        |                                             |                                              |                                         |                                 |
| Otu00607 | k                                                                                                                         | Fungi(100);p | Basidiomycota(100);c      | Agaricomycetes(100);o                  | Agaricales(100);f                           | Strophariaceae(100);g                        | Hypholoma(100);s                        | Hypholoma_sp(87);               |
| Otu00608 | k                                                                                                                         | Fungi(100);p | Ascomycota(100);c         | Leotiomycetes(100);o                   | Helotiales(100);f                           | unclassified_Helotiales(97);g                | unclassified_Helotiales(97);s           | Helotiales_sp(97);              |
| Otu00609 | k                                                                                                                         | Fungi(100);p | Ascomycota(100);c         | Leotiomycetes(100);o                   | Helotiales(100);f                           | unclassified_Helotiales(100);g               | unclassified_Helotiales(100);s          | Helotiales_sp(100);             |
| Otu00610 | k                                                                                                                         | Fungi(100);p | Ascomycota(100);c         | Dothideomycetes(100);o                 | Dothideomycetes_order_Incertae_sedis(100);f | Myxotrachaceae(100);g                        | Oidiendendron(100);s                    | Oidiendendron_rhodogenum(100);  |
| Otu00611 | k                                                                                                                         | Fungi(100);p | Ascomycota(100);c         | unclassified_Ascomycota(100);o         | unclassified_Ascomycota(100);f              | unclassified_Ascomycota(100);g               | unclassified_Ascomycota(100);s          | Ascomycota_sp(100);             |
| Otu00612 | k                                                                                                                         | Fungi(100);p | Ascomycota(100);c         | Saccharomycetes(100);o                 | Saccharomycetales(100);f                    | unclassified_Saccharomycetales(100);g        | unclassified_Saccharomycetales(100);s   | Saccharomycetales_sp(100);      |
| Otu00613 | k                                                                                                                         | Fungi(100);p | Zygomycota(100);c         | Zygomycota_class_Incertae_sedis(100);o | Mucorales(100);f                            | Umbelopsidaceae(100);g                       | Umbelopsis(100);s                       | Umbelopsis_ramanniana(100);     |
| Otu00614 | k                                                                                                                         | Fungi(100);p | Ascomycota(100);c         | Dothideomycetes(100);o                 | Pleosporales(100);f                         | Venturiaceae(100);g                          | Rhizosphaera(100);s                     | Rhizosphaera_oudemansii(100);   |
| Otu00615 | k                                                                                                                         | Fungi(100);p | Basidiomycota(100);c      | Agaricomycetes(100);o                  | Atheliales(100);f                           | Atheliales(100);g                            | Piloderma(100);s                        | Piloderma_sp(100);              |
| Otu00616 | k                                                                                                                         | Fungi(100);p | Basidiomycota(100);c      | Agaricomycetes(100);o                  | Atheliales(100);f                           | Atheliales(100);g                            | Piloderma(100);s                        | Piloderma_lanatum(100);         |
| Otu00617 | k                                                                                                                         | Fungi(100);p | Basidiomycota(100);c      | Agaricomycetes(100);o                  | Agaricales(100);f                           | Cortinariaceae(100);g                        | Cortinarius(100);s                      | Cortinarius_sp(100);            |
| Otu00618 | k                                                                                                                         | Fungi(100);p | Ascomycota(100);c         | Leotiomycetes(100);o                   | Helotiales(100);f                           | Hyaloscyphaceae(100);g                       | Arachnopeziza(100);s                    | Arachnopeziza_sp(100);          |
| Otu00619 | k                                                                                                                         | Fungi(100);p | Basidiomycota(100);c      | Agaricomycetes(100);o                  | Agaricales(100);f                           | Entolomataceae(100);g                        | Entoloma(100);s                         | Entoloma_sp(100);               |
| Otu00620 | unknown(100);unclassified(100);unclassified(100);unclassified(100);unclassified(100);unclassified(100);                   |              |                           |                                        |                                             |                                              |                                         |                                 |
| Otu00621 | k                                                                                                                         | Fungi(100);p | Ascomycota(100);c         | Leotiomycetes(100);o                   | Helotiales(61);f                            | Phacidaceae(61);g                            | Phacidium(61);s                         | Phacidium_lacerum(61);          |
| Otu00622 | k                                                                                                                         | Fungi(100);p | Ascomycota(100);c         | Leotiomycetes(100);o                   | Helotiales(100);f                           | Helotiales_family_Incertae_sedis(93);g       | Xenopolyscytulum(93);s                  | Xenopolyscytulum_sp(93);        |
| Otu00623 | k                                                                                                                         | Fungi(100);p | Basidiomycota(100);c      | Agaricomycetes(100);o                  | Thelephorales(100);f                        | Thelephoraceae(100);g                        | Tomentella(100);s                       | Tomentella_coerulea(100);       |
| Otu00624 | k                                                                                                                         | Fungi(100);p | Ascomycota(100);c         | Leotiomycetes(100);o                   | Helotiales(100);f                           | Helotiaceae(100);g                           | Crocicreas(61);s                        | Crocicreas_sp(61);              |
| Otu00625 | k                                                                                                                         | Fungi(100);p | Ascomycota(100);c         | Orbiliomycetes(100);o                  | Orbiliales(100);f                           | Orbiliceae(100);g                            | Dactylolla(100);s                       | Dactylolla_oviparasitica(100);  |
| Otu00626 | k                                                                                                                         | Fungi(100);p | Ascomycota(100);c         | Leotiomycetes(100);o                   | Helotiales(100);f                           | Helotiales_family_Incertae_sedis(100);g      | Hyphodiscus(100);s                      | Hyphodiscus_hymeniophilus(100); |
| Otu00628 | k                                                                                                                         | Fungi(100);p | Ascomycota(100);c         | Leotiomycetes(100);o                   | Helotiales(100);f                           | Hyaloscyphaceae(100);g                       | Lachnellula(100);s                      | Lachnellula_willkommii(56);     |
| Otu00629 | k                                                                                                                         | Fungi(100);p | Basidiomycota(100);c      | Agaricomycetes(100);o                  | Cantharellales(100);f                       | Hydnaceae(100);g                             | Sistotrema(100);s                       | Sistotrema_sp(100);             |
| Otu00630 | k                                                                                                                         | Fungi(100);p | Basidiomycota(100);c      | Agaricomycetes(100);o                  | Atheliales(100);f                           | Atheliales(100);g                            | unclassified_Atheliales(100);s          | Atheliales_sp(100);             |
| Otu00631 | unknown(100);unclassified(100);unclassified(100);unclassified(100);unclassified(100);unclassified(100);                   |              |                           |                                        |                                             |                                              |                                         |                                 |
| Otu00632 | k                                                                                                                         | Fungi(100);p | Ascomycota(100);c         | Dothideomycetes(100);o                 | Dothideomycetes_order_Incertae_sedis(100);f | Myxotrachaceae(100);g                        | Oidiendendron(100);s                    | Oidiendendron_pilicola(100);    |
| Otu00633 | k                                                                                                                         | Fungi(93);p  | Basidiomycota(93);c       | Microbotryomycetes(89);o               | Sporidiobolales(89);f                       | Sporidiobolales_family_Incertae_sedis(89);g  | Sporobolomyces(89);s                    | Sporobolomyces_coprosmae(89);   |
| Otu00634 | k                                                                                                                         | Fungi(100);p | Basidiomycota(100);c      | Agaricomycetes(100);o                  | Trechisporales(100);f                       | Hydnodontaceae(100);g                        | Trechispora(100);s                      | Trechispora_sp(100);            |
| Otu00635 | k                                                                                                                         | Fungi(100);p | Basidiomycota(100);c      | unclassified_Basidiomycota(100);o      | unclassified_Basidiomycota(100);f           | unclassified_Basidiomycota(100);g            | unclassified_Basidiomycota(100);s       | Basidiomycota_sp(100);          |
| Otu00636 | k                                                                                                                         | Fungi(100);p | unclassified_Fungi(100);c | unclassified_Fungi(100);o              | unclassified_Fungi(100);f                   | unclassified_Fungi(100);g                    | unclassified_Fungi(100);s               | Fungi_sp(100);                  |
| Otu00637 | unknown(100);unclassified(100);unclassified(100);unclassified(100);unclassified(100);unclassified(100);                   |              |                           |                                        |                                             |                                              |                                         |                                 |
| Otu00638 | k                                                                                                                         | Fungi(100);p | Chytridiomycota(100);c    | unclassified_Chytridiomycota(100);o    | unclassified_Chytridiomycota(100);f         | unclassified_Chytridiomycota(100);g          | unclassified_Chytridiomycota(100);s     | Chytridiomycota_sp(100);        |
| Otu00639 | k                                                                                                                         | Fungi(89);p  | Ascomycota(89);c          | Saccharomycetes(89);o                  | Saccharomycetales(89);f                     | Dipodascaceae(89);g                          | Basidioascus(89);s                      | Basidioascus_magus(89);         |
| Otu00640 | k                                                                                                                         | Fungi(100);p | Ascomycota(100);c         | Sordariomycetes(100);o                 | Hypocreales(100);f                          | Hypocreaceae(93);g                           | Trichoderma(93);s                       | Trichoderma_viride(93);         |
| Otu00641 | k                                                                                                                         | Fungi(100);p | Basidiomycota(100);c      | Agaricomycetes(100);o                  | Russulales(100);f                           | Russulaceae(100);g                           | Lactarius(100);s                        | Lactarius_hyginus(100);         |
| Otu00642 | k                                                                                                                         | Fungi(100);p | Ascomycota(100);c         | Leotiomycetes(100);o                   | Helotiales(100);f                           | unclassified_Helotiales(100);g               | unclassified_Helotiales(100);s          | Helotiales_sp(100);             |
| Otu00643 | k                                                                                                                         | Fungi(93);p  | Basidiomycota(93);c       | Agaricomycetes(93);o                   | Polyporales(93);f                           | Fomitopsidaceae(93);g                        | Anomoloma(93);s                         | Anomoloma_myceliosum(93);       |
| Otu00644 | k                                                                                                                         | Fungi(100);p | Basidiomycota(100);c      | Agaricomycetes(100);o                  | Boletales(100);f                            | Boletaceae(100);g                            | Boletus(100);s                          | Boletus_edulis(100);            |
| Otu00645 | k                                                                                                                         | Fungi(100);p | Basidiomycota(100);c      | Agaricomycetes(100);o                  | Agaricales(100);f                           | Cortinariaceae(100);g                        | Cortinarius(100);s                      | Cortinarius_gentilis(100);      |
| Otu00646 | k                                                                                                                         | Fungi(100);p | Basidiomycota(100);c      | Agaricomycetes(100);o                  | Sebacinales(100);f                          | Sebacinales_Group_B(100);g                   | unclassified_Sebacinales_Group_B(100);s | Sebacinales_Group_B_sp(100);    |
| Otu00647 | k                                                                                                                         | Fungi(100);p | Basidiomycota(100);c      | Agaricomycetes(100);o                  | Hymenochaetales(100);f                      | Hymenochaetales(100);g                       | Phellinidium(97);s                      | Phellinidium_weirii(97);        |
| Otu00648 | k                                                                                                                         | Fungi(100);p | Ascomycota(100);c         | Leotiomycetes(97);o                    | Helotiales(70);f                            | Helotiales_family_Incertae_sedis(70);g       | Cadophora(70);s                         | Cadophora_sp(70);               |
| Otu00650 | k                                                                                                                         | Fungi(89);p  | Basidiomycota(89);c       | Dacrymycetes(89);o                     | Dacrymycetales(89);f                        | Dacrymycetaceae(89);g                        | Cerinosterus(89);s                      | Cerinosterus_sp(89);            |
| Otu00651 | k                                                                                                                         | Fungi(100);p | Ascomycota(100);c         | Lecanoromycetes(100);o                 | unclassified_Lecanoromycetes(100);f         | unclassified_Lecanoromycetes(100);g          | unclassified_Lecanoromycetes(100);s     | Lecanoromycetes_sp(100);        |
| Otu00653 | k                                                                                                                         | Fungi(100);p | Basidiomycota(100);c      | Agaricomycetes(100);o                  | Hymenochaetales(88);f                       | Schizoporaceae(88);g                         | Xylodon(88);s                           | Xylodon_nesporii(88);           |
| Otu00654 | k                                                                                                                         | Fungi(100);p | Zygomycota(100);c         | Zygomycota_class_Incertae_sedis(100);o | Mucorales(100);f                            | Umbelopsidaceae(100);g                       | Umbelopsis(100);s                       | Umbelopsis_vinacea(100);        |
| Otu00655 | unknown(68);unclassified(68);unclassified(68);unclassified(68);unclassified(68);unclassified(68);                         |              |                           |                                        |                                             |                                              |                                         |                                 |
| Otu00656 | k                                                                                                                         | Fungi(100);p | Basidiomycota(100);c      | Agaricomycetes(100);o                  | Agaricales(100);f                           | Mycenaceae(100);g                            | Mycena(100);s                           | Mycena_sp(72);                  |
| Otu00657 | k                                                                                                                         | Fungi(100);p | Basidiomycota(100);c      | Agaricomycetes(100);o                  | Trechisporales(100);f                       | unclassified_Trechisporales(100);g           | unclassified_Trechisporales(100);s      | Trechisporales_sp(100);         |
| Otu00659 | k                                                                                                                         | Fungi(68);p  | Ascomycota(68);c          | Dothideomycetes(61);o                  | Pleosporales(61);f                          | Pleosporaceae(61);g                          | Curvularia(61);s                        | Curvularia_sp_LH3(61);          |
| Otu00660 | k                                                                                                                         | Fungi(100);p | Ascomycota(100);c         | Leotiomycetes(100);o                   | Helotiales(100);f                           | Dermateaceae(100);g                          | unclassified_Dermateaceae(100);s        | Dermateaceae_sp(100);           |
| Otu00661 | k                                                                                                                         | Fungi(76);p  | unclassified_Fungi(76);c  | unclassified_Fungi(76);o               | unclassified_Fungi(76);f                    | unclassified_Fungi(76);g                     | unclassified_Fungi(76);s                | Fungi_sp(76);                   |
| Otu00662 | k                                                                                                                         | Fungi(100);p | Ascomycota(100);c         | Lecanoromycetes(100);o                 | Umbilicariales(100);f                       | Umbilicariaceae(100);g                       | Fulgidea(100);s                         | Fulgidea_sierrae(100);          |
| Otu00663 | k                                                                                                                         | Fungi(100);p | Basidiomycota(100);c      | Agaricomycetes(100);o                  | Agaricales(100);f                           | Hygrophoraceae(100);g                        | Hygrophorus(100);s                      | Hygrophorus_pustulatus(100);    |
| Otu00664 | k                                                                                                                         | Fungi(100);p | Ascomycota(100);c         | unclassified_Ascomycota(100);o         | unclassified_Ascomycota(100);f              | unclassified_Ascomycota(100);g               | unclassified_Ascomycota(100);s          | Ascomycota_sp(100);             |
| Otu00665 | k                                                                                                                         | Fungi(100);p | Basidiomycota(100);c      | Microbotryomycetes(100);o              | Sporidiobolales(100);f                      | Sporidiobolales_family_Incertae_sedis(100);g | Rhodotorula(100);s                      | Rhodotorula_lignophila(100);    |
| Otu00666 | k                                                                                                                         | Fungi(100);p | Basidiomycota(100);c      | Agaricomycetes(100);o                  | Agaricales(100);f                           | Strophariaceae(100);g                        | Galerina(100);s                         | Galerina_fallax(100);           |
| Otu00668 | k                                                                                                                         | Fungi(100);p | Ascomycota(100);c         | Leotiomycetes(100);o                   | Helotiales(100);f                           | Helotiales_family_Incertae_sedis(100);g      | Hyphodiscus(100);s                      | Hyphodiscus_sp(100);            |
| Otu00669 | k                                                                                                                         | Fungi(92);p  | Ascomycota(92);c          | Dothideomycetes(92);o                  | unclassified_Dothideomycetes(92);f          | unclassified_Dothideomycetes(92);g           | unclassified_Dothideomycetes(92);s      | Dothideomycetes_sp(92);         |
| Otu00670 | unknown(63);unclassified(63);unclassified(63);unclassified(63);unclassified(63);unclassified(63);                         |              |                           |                                        |                                             |                                              |                                         |                                 |
| Otu00671 | k                                                                                                                         | Fungi(100);p | Rozellomycota(100);c      | unclassified_Rozellomycota(100);o      | unclassified_Rozellomycota(100);f           | unclassified_Rozellomycota(100);g            | unclassified_Rozellomycota(100);s       | Rozellomycota_sp(100);          |
| Otu00672 | k                                                                                                                         | Fungi(100);p | Basidiomycota(100);c      | Agaricomycetes(100);o                  | Agaricales(100);f                           | Cortinariaceae(100);g                        | Cortinarius(100);s                      | Cortinarius_agathosmus(88);     |
| Otu00673 | k                                                                                                                         | Fungi(100);p | Ascomycota(100);c         | Eurotiomycetes(100);o                  | Chaetothyriales(100);f                      | Herpotrichiellaceae(100);g                   | Phaeoniella(100);s                      | Phaeoniella_sp(100);            |

Supplementary, TableS1A  
 Taxonomy of OTUs  
 Normalized data, identification according to blast UNITEv57

|          |                                                                                                         |              |                      |                             |                          |                            |                          |                            |                              |                            |                         |                        |                       |         |
|----------|---------------------------------------------------------------------------------------------------------|--------------|----------------------|-----------------------------|--------------------------|----------------------------|--------------------------|----------------------------|------------------------------|----------------------------|-------------------------|------------------------|-----------------------|---------|
| Otu00674 | k                                                                                                       | Fungi(100);p | Ascomycota(100);c    | Dothideomycetes(100);o      | Dothideales(100);f       | Dothioraceae(100);g        | unclassified             | Dothioraceae(100);s        | Dothioraceae_sp(100);        |                            |                         |                        |                       |         |
| Otu00675 | k                                                                                                       | Fungi(100);p | Basidiomycota(100);c | Agaricomycetes(100);o       | Agaricales(100);f        | Cortinariaceae(100);g      | Cortinarius(100);s       | Cortinarius                | sp(100);                     |                            |                         |                        |                       |         |
| Otu00676 | k                                                                                                       | Fungi(96);p  | Basidiomycota(96);c  | Agaricomycetes(96);o        | Atheliales(96);f         | Atheliaceae(96);g          | unclassified             | Atheliaceae(96);s          | Atheliaceae_sp(96);          |                            |                         |                        |                       |         |
| Otu00677 | k                                                                                                       | Fungi(100);p | Ascomycota(100);c    | Leotiomycetes(100);o        | Helotiales(100);f        | Helotiales                 | family                   | Incertae                   | sedis(100);g                 | Catenulifera(100);s        | Catenulifera            | sp(100);               |                       |         |
| Otu00678 | k                                                                                                       | Fungi(92);p  | Glomeromycota(92);c  | Glomeromycetes(92);o        | Archaeosporales(92);f    | Archaeosporaceae(92);g     | unclassified             | Archaeosporaceae(92);s     | Archaeosporaceae_sp(92);     |                            |                         |                        |                       |         |
| Otu00679 | unknown(100);unclassified(100);unclassified(100);unclassified(100);unclassified(100);unclassified(100); |              |                      |                             |                          |                            |                          |                            |                              |                            |                         |                        |                       |         |
| Otu00680 | k                                                                                                       | Fungi(100);p | Ascomycota(100);c    | Dothideomycetes(100);o      | Dothideomycetes          | order                      | Incertae                 | sedis(100);f               | Myxotrichaceae(100);g        | Oidiodendron(100);s        | Oidiodendron            | rhodogenum(96);        |                       |         |
| Otu00681 | k                                                                                                       | Fungi(100);p | Ascomycota(100);c    | Sordariomycetes(100);o      | Hypocreales(100);f       | Hypocreaceae(100);g        | Trichoderma(55);s        | Trichoderma                | spirale(55);                 |                            |                         |                        |                       |         |
| Otu00683 | k                                                                                                       | Fungi(100);p | Ascomycota(100);c    | Saccharomycetes(100);o      | Saccharomycetales(100);f | unclassified               | Saccharomycetales(100);g | unclassified               | Saccharomycetales(100);s     | Saccharomycetales_sp(100); |                         |                        |                       |         |
| Otu00684 | unknown(100);unclassified(100);unclassified(100);unclassified(100);unclassified(100);unclassified(100); |              |                      |                             |                          |                            |                          |                            |                              |                            |                         |                        |                       |         |
| Otu00685 | k                                                                                                       | Fungi(83);p  | Ascomycota(83);c     | Sordariomycetes(83);o       | Ophiostomatales(83);f    | Ophiostomataceae(83);g     | Leptographium(83);s      | Leptographium              | piriforme(83);               |                            |                         |                        |                       |         |
| Otu00686 | k                                                                                                       | Fungi(100);p | Basidiomycota(100);c | Agaricomycetes(100);o       | Thelephorales(100);f     | Thelephoraceae(100);g      | unclassified             | Thelephoraceae(100);s      | Thelephoraceae_sp(100);      |                            |                         |                        |                       |         |
| Otu00687 | k                                                                                                       | Fungi(100);p | Ascomycota(100);c    | Saccharomycetes(96);o       | Saccharomycetales(96);f  | Trichomonascaceae(96);g    | Blastobotrys(96);s       | Blastobotrys               | serpentis(92);               |                            |                         |                        |                       |         |
| Otu00688 | k                                                                                                       | Fungi(100);p | Ascomycota(100);c    | Eurotiomycetes(100);o       | Chaetothyriales(100);f   | unclassified               | Chaetothyriales(100);g   | unclassified               | Chaetothyriales(100);s       | Chaetothyriales_sp(100);   |                         |                        |                       |         |
| Otu00689 | k                                                                                                       | Fungi(100);p | Basidiomycota(100);c | Agaricomycetes(100);o       | Polyporales(100);f       | Meruliaceae(100);g         | Hypochnicium(100);s      | Hypochnicium               | wakefieldiae(100);           |                            |                         |                        |                       |         |
| Otu00690 | k                                                                                                       | Fungi(92);p  | Ascomycota(92);c     | Leotiomycetes(92);o         | Leotiomycetes            | order                      | Incertae                 | sedis(92);f                | unclassified                 | Leotiomycetes(92);g        | unclassified            | Leotiomycetes(92);s    | Leotiomycetes_sp(92); |         |
| Otu00691 | k                                                                                                       | Fungi(100);p | Ascomycota(100);c    | Sordariomycetes(100);o      | Sordariales(100);f       | unclassified               | Sordariales(100);g       | unclassified               | Sordariales(100);s           | Sordariales_sp(100);       |                         |                        |                       |         |
| Otu00692 | k                                                                                                       | Fungi(100);p | Basidiomycota(100);c | Agaricomycetes(100);o       | Thelephorales(100);f     | Thelephoraceae(100);g      | Tomentellopsis(100);s    | Tomentellopsis             | echinospora(100);            |                            |                         |                        |                       |         |
| Otu00693 | k                                                                                                       | Fungi(83);p  | Ascomycota(83);c     | Dothideomycetes(83);o       | unclassified             | Dothideomycetes(83);f      | unclassified             | Dothideomycetes(83);g      | unclassified                 | Dothideomycetes(83);s      | Dothideomycetes_sp(83); |                        |                       |         |
| Otu00694 | k                                                                                                       | Fungi(100);p | Ascomycota(100);c    | Leotiomycetes(100);o        | Helotiales(100);f        | Hyaloscyphaceae(100);g     | Arachnopeziza(100);s     | Arachnopeziza              | aurata(100);                 |                            |                         |                        |                       |         |
| Otu00695 | k                                                                                                       | Fungi(100);p | Basidiomycota(100);c | Agaricomycetes(100);o       | Agaricales(100);f        | Cortinariaceae(100);g      | Cortinarius(100);s       | Cortinarius                | multiformis(100);            |                            |                         |                        |                       |         |
| Otu00696 | k                                                                                                       | Fungi(91);p  | Ascomycota(91);c     | Eurotiomycetes(91);o        | Verrucariales(91);f      | Verrucariaceae(91);g       | Dermatocarpon(91);s      | Dermatocarpon              | luridum                      | var                        | luridum(91);            |                        |                       |         |
| Otu00697 | k                                                                                                       | Fungi(100);p | Ascomycota(100);c    | Sordariomycetes(100);o      | Coniochaetales(100);f    | Coniochaetaceae(100);g     | unclassified             | Coniochaetaceae(100);s     | Coniochaetaceae_sp(100);     |                            |                         |                        |                       |         |
| Otu00698 | k                                                                                                       | Fungi(91);p  | Ascomycota(91);c     | Sordariomycetes(82);o       | Ophiostomatales(82);f    | Ophiostomataceae(82);g     | Ophiostoma(82);s         | Ophiostoma                 | denticulatum(82);            |                            |                         |                        |                       |         |
| Otu00699 | k                                                                                                       | Fungi(100);p | Rozellomycota(100);c | unclassified                | Rozellomycota(100);o     | unclassified               | Rozellomycota(100);f     | unclassified               | Rozellomycota(100);g         | unclassified               | Rozellomycota(100);s    | Rozellomycota_sp(100); |                       |         |
| Otu00700 | k                                                                                                       | Fungi(100);p | Ascomycota(100);c    | Leotiomycetes(100);o        | Helotiales(100);f        | Hyaloscyphaceae(100);g     | unclassified             | Hyaloscyphaceae(100);s     | Hyaloscyphaceae_sp(100);     |                            |                         |                        |                       |         |
| Otu00701 | k                                                                                                       | Fungi(100);p | Ascomycota(100);c    | unclassified                | Ascomycota(100);o        | unclassified               | Ascomycota(100);f        | unclassified               | Ascomycota(100);g            | unclassified               | Ascomycota(100);s       | Ascomycota_sp(100);    |                       |         |
| Otu00702 | k                                                                                                       | Fungi(100);p | Basidiomycota(100);c | Agaricomycetes(100);o       | Boletales(100);f         | Boletaceae(100);g          | Leccinum(100);s          | Leccinum                   | niveum(100);                 |                            |                         |                        |                       |         |
| Otu00703 | k                                                                                                       | Fungi(100);p | Ascomycota(100);c    | Leotiomycetes(100);o        | Helotiales(78);f         | unclassified               | Helotiales(78);g         | unclassified               | Helotiales(78);s             | Helotiales_sp(78);         |                         |                        |                       |         |
| Otu00704 | k                                                                                                       | Fungi(91);p  | Ascomycota(87);c     | Sordariomycetes(87);o       | Ophiostomatales(87);f    | Ophiostomataceae(87);g     | Leptographium(87);s      | Leptographium              | piriforme(87);               |                            |                         |                        |                       |         |
| Otu00705 | k                                                                                                       | Fungi(100);p | Ascomycota(100);c    | Eurotiomycetes(100);o       | Chaetothyriales(100);f   | unclassified               | Chaetothyriales(100);g   | unclassified               | Chaetothyriales(100);s       | Chaetothyriales_sp(100);   |                         |                        |                       |         |
| Otu00706 | k                                                                                                       | Fungi(100);p | Basidiomycota(100);c | Agaricomycetes(100);o       | Russulales(100);f        | Russulaceae(100);g         | Russula(100);s           | Russula                    | xerampelina(100);            |                            |                         |                        |                       |         |
| Otu00707 | k                                                                                                       | Fungi(100);p | Basidiomycota(100);c | Agaricomycetes(100);o       | Auriculariales(100);f    | unclassified               | Auriculariales(100);g    | unclassified               | Auriculariales(100);s        | Auriculariales_sp(100);    |                         |                        |                       |         |
| Otu00708 | k                                                                                                       | Fungi(100);p | Basidiomycota(100);c | Agaricomycetes(100);o       | Trechisporales(100);f    | Hydnodontaceae(82);g       | Trechispora(82);s        | Trechispora                | sp(82);                      |                            |                         |                        |                       |         |
| Otu00709 | k                                                                                                       | Fungi(100);p | Basidiomycota(100);c | Attractiellomycetes(100);o  | Attractiellales(100);f   | unclassified               | Attractiellales(100);g   | unclassified               | Attractiellales(100);s       | Attractiellales_sp(100);   |                         |                        |                       |         |
| Otu00710 | k                                                                                                       | Fungi(100);p | Ascomycota(100);c    | Leotiomycetes(100);o        | Helotiales(100);f        | Vibrissaceae(100);g        | Phialocephala(100);s     | Phialocephala              | sphaeroides(100);            |                            |                         |                        |                       |         |
| Otu00711 | k                                                                                                       | Fungi(100);p | Ascomycota(100);c    | Orbiliomycetes(100);o       | unclassified             | Orbiliomycetes(100);f      | unclassified             | Orbiliomycetes(100);g      | unclassified                 | Orbiliomycetes(100);s      | Orbiliomycetes_sp(100); |                        |                       |         |
| Otu00712 | k                                                                                                       | Fungi(100);p | Ascomycota(100);c    | unclassified                | Ascomycota(100);o        | unclassified               | Ascomycota(100);f        | unclassified               | Ascomycota(100);g            | unclassified               | Ascomycota(100);s       | Ascomycota_sp(100);    |                       |         |
| Otu00713 | k                                                                                                       | Fungi(100);p | Basidiomycota(100);c | Agaricomycetes(100);o       | Cantharellales(100);f    | unclassified               | Cantharellales(100);g    | unclassified               | Cantharellales(100);s        | Cantharellales_sp(100);    |                         |                        |                       |         |
| Otu00714 | k                                                                                                       | Fungi(100);p | Ascomycota(100);c    | Leotiomycetes(100);o        | Helotiales(100);f        | unclassified               | Helotiales(100);g        | unclassified               | Helotiales(100);s            | Helotiales_sp(100);        |                         |                        |                       |         |
| Otu00715 | k                                                                                                       | Fungi(96);p  | Ascomycota(96);c     | Sordariomycetes(96);o       | Ophiostomatales(96);f    | Ophiostomataceae(96);g     | Leptographium(96);s      | Leptographium              | piriforme(96);               |                            |                         |                        |                       |         |
| Otu00716 | k                                                                                                       | Fungi(100);p | Ascomycota(100);c    | Eurotiomycetes(100);o       | Chaetothyriales(100);f   | Herpotrichiellaceae(100);g | unclassified             | Herpotrichiellaceae(100);s | Herpotrichiellaceae_sp(100); |                            |                         |                        |                       |         |
| Otu00717 | k                                                                                                       | Fungi(96);p  | Ascomycota(96);c     | Saccharomycetes(96);o       | Saccharomycetales(96);f  | Dipodascaceae(96);g        | Basidioascus(96);s       | Basidioascus               | magus(96);                   |                            |                         |                        |                       |         |
| Otu00718 | k                                                                                                       | Fungi(100);p | Basidiomycota(100);c | Tremellomycetes(100);o      | Filobasidiales(100);f    | Filobasidiaceae(100);g     | Cryptococcus(100);s      | Cryptococcus               | gastricus(100);              |                            |                         |                        |                       |         |
| Otu00719 | k                                                                                                       | Fungi(100);p | Basidiomycota(100);c | Agaricomycetes(100);o       | Atheliales(100);f        | Atheliaceae(100);g         | Piloderma(100);s         | Piloderma                  | fallax(100);                 |                            |                         |                        |                       |         |
| Otu00720 | k                                                                                                       | Fungi(100);p | Basidiomycota(100);c | Agaricomycetes(100);o       | Agaricales(100);f        | Cortinariaceae(100);g      | Cortinarius(100);s       | Cortinarius                | acutovelatus(100);           |                            |                         |                        |                       |         |
| Otu00721 | k                                                                                                       | Fungi(100);p | Basidiomycota(100);c | Agaricomycetes(100);o       | Auriculariales(100);f    | Auriculariales             | family                   | Incertae                   | sedis(100);g                 | Basiodiodendron(100);s     | Basiodiodendron         | caesiocinereum(100);   |                       |         |
| Otu00722 | k                                                                                                       | Fungi(100);p | Basidiomycota(100);c | Agaricomycetes(100);o       | Corticiales(100);f       | Corticium(100);g           | Corticium                | roseum(100);               |                              |                            |                         |                        |                       |         |
| Otu00723 | k                                                                                                       | Fungi(100);p | Ascomycota(100);c    | Sordariomycetes(100);o      | Hypocreales(100);f       | Nectriaceae(81);g          | Neonectria(81);s         | Neonectria                 | major(81);                   |                            |                         |                        |                       |         |
| Otu00724 | k                                                                                                       | Fungi(100);p | Basidiomycota(100);c | Microbotryomycetes(100);o   | Sporidiobolales(100);f   | Sporidiobolales            | family                   | Incertae                   | sedis(100);g                 | Rhodotorula(100);s         | Rhodotorula             | sp                     | MLB                   | I(100); |
| Otu00725 | k                                                                                                       | Fungi(100);p | Ascomycota(100);c    | Sordariomycetes(100);o      | Sordariales(100);f       | Chaetomiaceae(100);g       | Humicola(100);s          | Humicola                   | fuscoatra                    | var                        | fuscoatra(96);          |                        |                       |         |
| Otu00726 | k                                                                                                       | Fungi(100);p | Basidiomycota(100);c | Agaricomycetes(100);o       | Polyporales(100);f       | unclassified               | Polyporales(91);g        | unclassified               | Polyporales(91);s            | Polyporales_sp(91);        |                         |                        |                       |         |
| Otu00727 | k                                                                                                       | Fungi(100);p | Basidiomycota(100);c | Agaricomycetes(100);o       | unclassified             | Agaricomycetes(100);f      | unclassified             | Agaricomycetes(100);g      | unclassified                 | Agaricomycetes(100);s      | Agaricomycetes_sp(100); |                        |                       |         |
| Otu00728 | k                                                                                                       | Fungi(91);p  | Ascomycota(91);c     | Eurotiomycetes(91);o        | Onygenales(91);f         | Ajellomycetaceae(91);g     | Spiromastix(91);s        | Spiromastix                | warcupii(91);                |                            |                         |                        |                       |         |
| Otu00729 | k                                                                                                       | Fungi(100);p | Basidiomycota(100);c | Agaricomycetes(100);o       | Boletales(100);f         | Boletaceae(100);g          | Boletus(100);s           | Boletus                    | badius(100);                 |                            |                         |                        |                       |         |
| Otu00730 | k                                                                                                       | Fungi(100);p | Basidiomycota(100);c | Agaricomycetes(100);o       | Trechisporales(100);f    | Hydnodontaceae(100);g      | Trechispora(100);s       | Trechispora                | sp(100);                     |                            |                         |                        |                       |         |
| Otu00731 | unknown(100);unclassified(100);unclassified(100);unclassified(100);unclassified(100);unclassified(100); |              |                      |                             |                          |                            |                          |                            |                              |                            |                         |                        |                       |         |
| Otu00732 | k                                                                                                       | Fungi(100);p | unclassified         | Fungi(100);c                | unclassified             | Fungi(100);o               | unclassified             | Fungi(100);f               | unclassified                 | Fungi(100);g               | unclassified            | Fungi(100);s           | Fungi_sp(100);        |         |
| Otu00733 | k                                                                                                       | Fungi(100);p | Ascomycota(100);c    | unclassified                | Ascomycota(100);o        | unclassified               | Ascomycota(100);f        | unclassified               | Ascomycota(100);g            | unclassified               | Ascomycota(100);s       | Ascomycota_sp(100);    |                       |         |
| Otu00734 | k                                                                                                       | Fungi(95);p  | Ascomycota(95);c     | Sordariomycetes(95);o       | Ophiostomatales(95);f    | Ophiostomataceae(95);g     | Leptographium(95);s      | Leptographium              | piriforme(95);               |                            |                         |                        |                       |         |
| Otu00735 | k                                                                                                       | Fungi(100);p | Basidiomycota(100);c | Agaricomycetes(100);o       | Agaricales(100);f        | unclassified               | Agaricales(100);g        | unclassified               | Agaricales(100);s            | Agaricales_sp(100);        |                         |                        |                       |         |
| Otu00736 | k                                                                                                       | Fungi(100);p | Basidiomycota(100);c | Agaricostilbomycetes(100);o | Agaricostilbales(100);f  | Agaricostilbaceae(100);g   | Bensingtonia(100);s      | Bensingtonia               | ingoldii(100);               |                            |                         |                        |                       |         |
| Otu00737 | k                                                                                                       | Fungi(90);p  | Basidiomycota(90);c  | Agaricomycetes(90);o        | Cantharellales(90);f     | Tulasnellaceae(90);g       | unclassified             | Tulasnellaceae(90);s       | Tulasnellaceae_sp(90);       |                            |                         |                        |                       |         |
| Otu00738 | k                                                                                                       | Fungi(100);p | Basidiomycota(100);c | Agaricomycetes(100);o       | Agaricales(100);f        | Cortinariaceae(100);g      | Cortinarius(100);s       | Cortinarius                | sp(70);                      |                            |                         |                        |                       |         |
| Otu00739 | k                                                                                                       | Fungi(100);p | Basidiomycota(100);c | Agaricomycetes(100);o       | Polyporales(100);f       | Fomitopsidaceae(100);g     | Postia(100);s            | Postia                     | sericeomollis(100);          |                            |                         |                        |                       |         |
| Otu00740 | k                                                                                                       | Fungi(100);p | Basidiomycota(100);c | Agaricomycetes(100);o       | Agaricales(100);f        | Marasmiaceae(100);g        | Megacollybia(100);s      | Megacollybia               | platyphylla(100);            |                            |                         |                        |                       |         |

Supplementary, TableS1A  
 Taxonomy of OTUs  
 Normalized data, identification according to blast UNITEvs7

|          |                                                                                                         |              |                          |                                        |                                         |                                              |                                       |                                 |
|----------|---------------------------------------------------------------------------------------------------------|--------------|--------------------------|----------------------------------------|-----------------------------------------|----------------------------------------------|---------------------------------------|---------------------------------|
| Otu00741 | k                                                                                                       | Fungi(100);p | Ascomycota(100);c        | Leotiomyces(100);o                     | Helotiales(100);f                       | Hyaloscyphaceae(100);g                       | Arachnopeziza(100);s                  | Arachnopeziza sp(100);          |
| Otu00742 | k                                                                                                       | Fungi(100);p | Basidiomycota(100);c     | Tremellomycetes(100);o                 | Cystoflobasidiales(100);f               | Cystoflobasidiaceae(100);g                   | Mrakia(100);s                         | Mrakia frigida(100);            |
| Otu00743 | k                                                                                                       | Fungi(100);p | Zygomycota(100);c        | Zygomycota class Incertae sedis(100);o | Mortierellales(100);f                   | Mortierellaceae(100);g                       | Mortierella(100);s                    | Mortierella sp(100);            |
| Otu00744 | k                                                                                                       | Fungi(100);p | Ascomycota(100);c        | Sordariomycetes(100);o                 | Hypocreales(100);f                      | Nectriaceae(100);g                           | Volutella(100);s                      | Volutella sp(100);              |
| Otu00745 | k                                                                                                       | Fungi(100);p | Ascomycota(100);c        | Leotiomyces(100);o                     | Helotiales(100);f                       | unclassified Helotiales(100);g               | unclassified Helotiales(100);s        | Helotiales sp(100);             |
| Otu00746 | k                                                                                                       | Fungi(100);p | Basidiomycota(100);c     | Agaricomycetes(100);o                  | Atheliales(100);f                       | Atheliaceae(100);g                           | Piloderma(100);s                      | Piloderma sphaerosporum(100);   |
| Otu00747 | k                                                                                                       | Fungi(100);p | Zygomycota(100);c        | Zygomycota class Incertae sedis(100);o | Mortierellales(100);f                   | Mortierellaceae(100);g                       | Mortierella(100);s                    | Mortierella sp(100);            |
| Otu00748 | k                                                                                                       | Fungi(100);p | Ascomycota(100);c        | Sordariomycetes(95);o                  | unclassified Sordariomycetes(95);f      | unclassified Sordariomycetes(95);g           | unclassified Sordariomycetes(95);s    | Sordariomycetes sp(95);         |
| Otu00749 | k                                                                                                       | Fungi(100);p | Basidiomycota(100);c     | Agaricomycetes(100);o                  | Cantharellales(100);f                   | Hydnaceae(100);g                             | Sistotrema(100);s                     | Sistotrema sp(100);             |
| Otu00750 | k                                                                                                       | Fungi(75);p  | Basidiomycota(75);c      | Microbotryomycetes(75);o               | Sporidiobolales(75);f                   | Sporidiobolales family Incertae sedis(75);g  | Sporobolomyces(75);s                  | Sporobolomyces linderiae(75);   |
| Otu00751 | k                                                                                                       | Fungi(100);p | Ascomycota(100);c        | Leotiomyces(100);o                     | Helotiales(100);f                       | Dermateaceae(100);g                          | unclassified Dermateaceae(100);s      | Dermateaceae sp(100);           |
| Otu00753 | k                                                                                                       | Fungi(100);p | Basidiomycota(100);c     | Agaricomycetes(100);o                  | Agaricales(70);f                        | Entolomataceae(70);g                         | Entoloma(70);s                        | Entoloma rhodocylix(70);        |
| Otu00754 | k                                                                                                       | Fungi(95);p  | Basidiomycota(95);c      | Tremellomycetes(90);o                  | Trichosporonales(90);f                  | Trichosporonaceae(90);g                      | Trichosporon(90);s                    | Trichosporon dulciturum(90);    |
| Otu00755 | k                                                                                                       | Fungi(100);p | Ascomycota(100);c        | Eurotiomycetes(100);o                  | Chaetothyriales(100);f                  | Herpotrichiellaceae(100);g                   | Cladophialophora(100);s               | Cladophialophora sp(100);       |
| Otu00756 | k                                                                                                       | Fungi(100);p | Ascomycota(100);c        | Eurotiomycetes(100);o                  | Chaetothyriales(100);f                  | Herpotrichiellaceae(100);g                   | Cladophialophora(100);s               | Cladophialophora sp(95);        |
| Otu00757 | k                                                                                                       | Fungi(100);p | Ascomycota(100);c        | Leotiomyces(100);o                     | Helotiales(100);f                       | unclassified Helotiales(100);g               | unclassified Helotiales(100);s        | Helotiales sp(100);             |
| Otu00758 | k                                                                                                       | Fungi(100);p | Ascomycota(100);c        | unclassified Ascomycota(100);o         | unclassified Ascomycota(100);f          | unclassified Ascomycota(100);g               | unclassified Ascomycota(100);s        | Ascomycota sp(100);             |
| Otu00759 | k                                                                                                       | Fungi(100);p | Basidiomycota(100);c     | Agaricomycetes(100);o                  | Auriculariales(100);f                   | unclassified Auriculariales(100);g           | unclassified Auriculariales(100);s    | Auriculariales sp(100);         |
| Otu00760 | k                                                                                                       | Fungi(100);p | Basidiomycota(100);c     | Agaricomycetes(100);o                  | Cortinariaceae(100);f                   | Cortinarius(100);g                           | Cortinarius(100);s                    | Cortinarius junghuhnii(100);    |
| Otu00761 | k                                                                                                       | Fungi(90);p  | Ascomycota(90);c         | Sordariomycetes(90);o                  | Hypocreales(90);f                       | Cordycipitaceae(90);g                        | unclassified Cordycipitaceae(90);s    | Cordycipitaceae sp(90);         |
| Otu00762 | k                                                                                                       | Fungi(100);p | Ascomycota(100);c        | Leotiomyces(100);o                     | Helotiales(100);f                       | Vibrissaceae(100);g                          | Acephala(95);s                        | Acephala applanata(95);         |
| Otu00763 | k                                                                                                       | Fungi(100);p | unclassified Fungi(90);c | unclassified Fungi(90);o               | unclassified Fungi(90);f                | unclassified Fungi(90);g                     | unclassified Fungi(90);s              | Fungi sp(90);                   |
| Otu00764 | unknown(100);unclassified(100);unclassified(100);unclassified(100);unclassified(100);unclassified(100); |              |                          |                                        |                                         |                                              |                                       |                                 |
| Otu00765 | k                                                                                                       | Fungi(100);p | Basidiomycota(100);c     | Agaricomycetes(100);o                  | Agaricales(100);f                       | Cortinariaceae(100);g                        | Cortinarius(100);s                    | Cortinarius sp(100);            |
| Otu00766 | k                                                                                                       | Fungi(100);p | Zygomycota(100);c        | Zygomycota class Incertae sedis(100);o | Mortierellales(100);f                   | Mortierellaceae(100);g                       | Mortierella(100);s                    | Mortierella biramosa(95);       |
| Otu00767 | k                                                                                                       | Fungi(100);p | Ascomycota(100);c        | Dothideomycetes(100);o                 | unclassified Dothideomycetes(100);f     | unclassified Dothideomycetes(100);g          | unclassified Dothideomycetes(100);s   | Dothideomycetes sp(100);        |
| Otu00768 | k                                                                                                       | Fungi(100);p | Ascomycota(100);c        | Dothideomycetes(100);o                 | Pleosporales(100);f                     | Sporormiaceae(100);g                         | Sporormiella(100);s                   | Sporormiella sp(100);           |
| Otu00769 | k                                                                                                       | Fungi(100);p | Basidiomycota(100);c     | Agaricomycetes(100);o                  | Russulales(100);f                       | Peniophoraceae(100);g                        | Gloiothele(100);s                     | Gloiothele citrina(100);        |
| Otu00770 | k                                                                                                       | Fungi(95);p  | Basidiomycota(95);c      | Agaricomycetes(95);o                   | Polyporales(95);f                       | Fomitopsidaceae(95);g                        | Anomoloma(95);s                       | Anomoloma myceliosum(95);       |
| Otu00771 | k                                                                                                       | Fungi(74);p  | Ascomycota(74);c         | Dothideomycetes(74);o                  | Pleosporales(74);f                      | Pleosporaceae(74);g                          | Curvularia(74);s                      | Curvularia sp LH3(74);          |
| Otu00772 | k                                                                                                       | Fungi(100);p | Basidiomycota(100);c     | Agaricomycetes(100);o                  | Boletales(100);f                        | Tapinellaceae(100);g                         | Tapinella(100);s                      | Tapinella atrotomentosa(100);   |
| Otu00773 | k                                                                                                       | Fungi(100);p | Ascomycota(100);c        | Sordariomycetes(100);o                 | Chaetosphaeriales(100);f                | unclassified Chaetosphaeriales(100);g        | unclassified Chaetosphaeriales(100);s | Chaetosphaeriales sp(100);      |
| Otu00774 | k                                                                                                       | Fungi(100);p | Ascomycota(95);c         | Dothideomycetes(95);o                  | Pleosporales(95);f                      | Pleosporaceae(95);g                          | Curvularia(95);s                      | Curvularia sp LH3(95);          |
| Otu00775 | k                                                                                                       | Fungi(100);p | Ascomycota(100);c        | Leotiomyces(100);o                     | Helotiales(100);f                       | Helotiaceae(100);g                           | unclassified Helotiaceae(100);s       | Helotiaceae sp(100);            |
| Otu00776 | k                                                                                                       | Fungi(89);p  | Glomeromycota(89);c      | Glomeromycetes(89);o                   | Diversisporales(89);f                   | Diversisporaceae(89);g                       | Diversispora(89);s                    | Diversispora celata(89);        |
| Otu00777 | k                                                                                                       | Fungi(100);p | Basidiomycota(100);c     | Agaricomycetes(100);o                  | Polyporales(100);f                      | Fomitopsidaceae(100);g                       | Fomitopsis(100);s                     | Fomitopsis pinicola(100);       |
| Otu00778 | unknown(100);unclassified(100);unclassified(100);unclassified(100);unclassified(100);unclassified(100); |              |                          |                                        |                                         |                                              |                                       |                                 |
| Otu00779 | unknown(100);unclassified(100);unclassified(100);unclassified(100);unclassified(100);unclassified(100); |              |                          |                                        |                                         |                                              |                                       |                                 |
| Otu00780 | k                                                                                                       | Fungi(100);p | Ascomycota(100);c        | Leotiomyces(100);o                     | Helotiales(100);f                       | Helotiaceae(100);g                           | Hymenoscyphus(100);s                  | Hymenoscyphus sp aurim710(100); |
| Otu00781 | k                                                                                                       | Fungi(100);p | Basidiomycota(100);c     | Agaricomycetes(100);o                  | Agaricales(100);f                       | Marasmiaceae(100);g                          | Gymnopus(100);s                       | Gymnopus ocior(100);            |
| Otu00782 | k                                                                                                       | Fungi(100);p | Basidiomycota(100);c     | Agaricomycetes(100);o                  | Polyporales(100);f                      | Meruliaceae(100);g                           | Hyphoderma(100);s                     | Hyphoderma praetermissum(100);  |
| Otu00783 | k                                                                                                       | Fungi(100);p | Ascomycota(100);c        | Pezizomycetes(100);o                   | Pezizales(100);f                        | unclassified Pezizales(95);g                 | unclassified Pezizales(95);s          | Pezizales sp(95);               |
| Otu00784 | k                                                                                                       | Fungi(100);p | Ascomycota(100);c        | Eurotiomycetes(100);o                  | Eurotiales(100);f                       | Eurotiales family Incertae sedis(100);g      | Kendrickiella(100);s                  | Kendrickiella phycomyces(100);  |
| Otu00785 | k                                                                                                       | Fungi(100);p | Ascomycota(100);c        | Sordariomycetes(100);o                 | Hypocreales(100);f                      | unclassified Hypocreales(100);g              | unclassified Hypocreales(100);s       | Hypocreales sp(100);            |
| Otu00786 | k                                                                                                       | Fungi(100);p | Basidiomycota(100);c     | Tremellomycetes(100);o                 | unclassified Tremellomycetes(84);f      | unclassified Tremellomycetes(84);g           | unclassified Tremellomycetes(84);s    | Tremellomycetes sp(84);         |
| Otu00787 | k                                                                                                       | Fungi(100);p | Ascomycota(100);c        | Dothideomycetes(100);o                 | Venturiales(95);f                       | unclassified Venturiales(95);g               | unclassified Venturiales(95);s        | Venturiales sp(95);             |
| Otu00788 | k                                                                                                       | Fungi(100);p | Basidiomycota(100);c     | Attractiellomycetes(100);o             | Attractiellales(100);f                  | unclassified Attractiellales(100);g          | unclassified Attractiellales(100);s   | Attractiellales sp(100);        |
| Otu00789 | k                                                                                                       | Fungi(100);p | Ascomycota(100);c        | Leotiomyces(100);o                     | Helotiales(100);f                       | unclassified Helotiales(100);g               | unclassified Helotiales(100);s        | Helotiales sp(100);             |
| Otu00791 | k                                                                                                       | Fungi(89);p  | Basidiomycota(89);c      | Agaricomycetes(89);o                   | Polyporales(89);f                       | unclassified Polyporales(89);g               | unclassified Polyporales(89);s        | Polyporales sp(89);             |
| Otu00792 | k                                                                                                       | Fungi(100);p | Ascomycota(100);c        | Orbiliomycetes(95);o                   | Orbiliales(95);f                        | Orbiliaceae(95);g                            | Dactylella(95);s                      | Dactylella sp(95);              |
| Otu00793 | k                                                                                                       | Fungi(100);p | Ascomycota(100);c        | Leotiomyces(100);o                     | Leotiomyces order Incertae sedis(100);f | Leotiomyces family Incertae sedis(100);g     | Melinomyces(100);s                    | Melinomyces sp_GK_2010(100);    |
| Otu00794 | k                                                                                                       | Fungi(100);p | Basidiomycota(100);c     | Pucciniomycetes(100);o                 | Pucciniales(100);f                      | unclassified Pucciniales(100);g              | unclassified Pucciniales(100);s       | Pucciniales sp(100);            |
| Otu00795 | k                                                                                                       | Fungi(100);p | Basidiomycota(100);c     | Agaricomycetes(100);o                  | Boletales(100);f                        | Boletaceae(100);g                            | unclassified Boletaceae(89);s         | Boletaceae sp(89);              |
| Otu00796 | k                                                                                                       | Fungi(100);p | Ascomycota(100);c        | Dothideomycetes(100);o                 | Venturiales(100);f                      | Venturiaceae(100);g                          | unclassified Venturiaceae(100);s      | Venturiaceae sp(100);           |
| Otu00797 | k                                                                                                       | Fungi(89);p  | unclassified Fungi(89);c | unclassified Fungi(89);o               | unclassified Fungi(89);f                | unclassified Fungi(89);g                     | unclassified Fungi(89);s              | Fungi sp(89);                   |
| Otu00798 | k                                                                                                       | Fungi(100);p | Ascomycota(95);c         | Ascomycota class Incertae sedis(95);o  | Ascomycota order Incertae sedis(95);f   | Ascomycota family Incertae sedis(95);g       | Spegazzinia(95);s                     | Spegazzinia sp(95);             |
| Otu00799 | k                                                                                                       | Fungi(77);p  | Glomeromycota(77);c      | Glomeromycetes(77);o                   | Archaeosporales(77);f                   | Archaeosporaceae(77);g                       | unclassified Archaeosporaceae(77);s   | Archaeosporaceae sp(77);        |
| Otu00800 | k                                                                                                       | Fungi(100);p | Ascomycota(100);c        | Leotiomyces(100);o                     | Helotiales(100);f                       | unclassified Helotiales(100);g               | unclassified Helotiales(100);s        | Helotiales sp(100);             |
| Otu00801 | k                                                                                                       | Fungi(100);p | Basidiomycota(100);c     | Agaricomycetes(100);o                  | unclassified Agaricomycetes(100);f      | unclassified Agaricomycetes(100);g           | unclassified Agaricomycetes(100);s    | Agaricomycetes sp(100);         |
| Otu00802 | k                                                                                                       | Fungi(100);p | Ascomycota(100);c        | Saccharomycetes(95);o                  | Saccharomycetales(95);f                 | Saccharomycetaceae(95);g                     | Kluyveromyces(95);s                   | Kluyveromyces blattae(95);      |
| Otu00803 | k                                                                                                       | Fungi(100);p | Basidiomycota(100);c     | Agaricomycetes(100);o                  | Agaricales(100);f                       | Mycenaceae(100);g                            | Mycena(100);s                         | Mycena inclinata(100);          |
| Otu00804 | k                                                                                                       | Fungi(100);p | Ascomycota(65);c         | Lecanoromycetes(65);o                  | unclassified Lecanoromycetes(65);f      | unclassified Lecanoromycetes(65);g           | unclassified Lecanoromycetes(65);s    | Lecanoromycetes sp(65);         |
| Otu00805 | k                                                                                                       | Fungi(100);p | Basidiomycota(100);c     | Agaricomycetes(100);o                  | Hymenochaetales(100);f                  | Hymenochaetales family Incertae sedis(100);g | Trichaptum(100);s                     | Trichaptum sp(100);             |
| Otu00806 | k                                                                                                       | Fungi(100);p | Ascomycota(100);c        | Eurotiomycetes(100);o                  | Eurotiales(100);f                       | Trichocomaceae(100);g                        | Penicillium(100);s                    | Penicillium ribium(77);         |
| Otu00807 | k                                                                                                       | Fungi(100);p | Basidiomycota(100);c     | Agaricomycetes(100);o                  | Polyporales(100);f                      | Meruliaceae(100);g                           | Hyphoderma(100);s                     | Hyphoderma subtestaceum(100);   |
| Otu00808 | k                                                                                                       | Fungi(100);p | Ascomycota(100);c        | Leotiomyces(100);o                     | Leotiomyces order Incertae sedis(100);f | Leotiomyces family Incertae sedis(100);g     | Melinomyces(100);s                    | Melinomyces bicolor(100);       |

Supplementary, TableS1A  
 Taxonomy of OTUs  
 Normalized data, identification according to blast UNITEv57

|          |                                                                                                         |                                                                                                                                                                                                              |
|----------|---------------------------------------------------------------------------------------------------------|--------------------------------------------------------------------------------------------------------------------------------------------------------------------------------------------------------------|
| Otu00809 | k                                                                                                       | Fungi(100);p_Basidiomycota(100);c_Agaricomycetes(100);o_Auriculariales(95);f_Auriculariales_family_Incertae_sedis(95);g_Auricularia(95);s_Auricularia_sp(95);                                                |
| Otu00810 | k                                                                                                       | Fungi(100);p_Basidiomycota(100);c_Agaricomycetes(100);o_Agaricales(95);f_Pluteaceae(95);g_Pluteus(95);s_Pluteus_sp_UC_1861230(95);                                                                           |
| Otu00811 | k                                                                                                       | Fungi(59);p_Ascomycota(59);c_Saccharomycetes(59);o_Saccharomycetales(59);f_Saccharomycetales(59);g_Zygosaccharomyces(59);s_Zygosaccharomyces_rouxii(59);                                                     |
| Otu00812 | k                                                                                                       | Fungi(100);p_Ascomycota(100);c_Eurotiomycetes(100);o_Chaetothyriales(100);f_Herpotrichiellaceae(100);g_Cladophialophora(100);s_Cladophialophora_sp(100);                                                     |
| Otu00813 | k                                                                                                       | Fungi(59);p_Basidiomycota(59);c_Agaricomycetes(59);o_Russulales(59);f_Russulaceae(59);g_Lactarius(59);s_Lactarius_aquizonatus(59);                                                                           |
| Otu00814 | unknown(71);unclassified(71);unclassified(71);unclassified(71);unclassified(71);unclassified(71);       |                                                                                                                                                                                                              |
| Otu00815 | k                                                                                                       | Fungi(77);p_Ascomycota(77);c_Pezizomycetes(77);o_Pezizales(77);f_Tuberaceae(77);g_Tuber(77);s_Tuber_sp(77);                                                                                                  |
| Otu00816 | k                                                                                                       | Fungi(100);p_Ascomycota(100);c_Leotiomycetes(100);o_Helotiales(100);f_Dermateaceae(100);g_unclassified_Dermateaceae(100);s_uncultured_Dermateaceae(100);                                                     |
| Otu00817 | k                                                                                                       | Fungi(100);p_Ascomycota(100);c_Saccharomycetes(100);o_Saccharomycetales(100);f_Saccharomycetales_family_Incertae_sedis(100);g_Candida(100);s_Candida_sp_GA1504(95);                                          |
| Otu00818 | k                                                                                                       | Fungi(100);p_Ascomycota(100);c_Leotiomycetes(100);o_Helotiales(100);f_Dermateaceae(100);g_unclassified_Dermateaceae(100);s_Dermateaceae_sp(100);                                                             |
| Otu00819 | k                                                                                                       | Fungi(100);p_Basidiomycota(100);c_Agaricomycetes(100);o_Russulales(100);f_Russulaceae(100);g_Russula(95);s_Russula_sp(95);                                                                                   |
| Otu00820 | k                                                                                                       | Fungi(100);p_Basidiomycota(100);c_Tremellomycetes(100);o_Tremellales(100);f_Tremellales_family_Incertae_sedis(100);g_Cryptococcus(100);s_Cryptococcus_podzolicus(100);                                       |
| Otu00821 | k                                                                                                       | Fungi(100);p_Basidiomycota(100);c_Agaricomycetes(100);o_unclassified_Agaricomycetes(100);f_unclassified_Agaricomycetes(100);g_unclassified_Agaricomycetes(100);s_Agaricomycetes_sp(100);                     |
| Otu00822 | unknown(100);unclassified(100);unclassified(100);unclassified(100);unclassified(100);unclassified(100); |                                                                                                                                                                                                              |
| Otu00823 | k                                                                                                       | Fungi(100);p_Ascomycota(100);c_Leotiomycetes(89);o_Helotiales(89);f_unclassified_Helotiales(89);g_unclassified_Helotiales(89);s_Helotiales_sp(89);                                                           |
| Otu00824 | unknown(100);unclassified(100);unclassified(100);unclassified(100);unclassified(100);unclassified(100); |                                                                                                                                                                                                              |
| Otu00825 | k                                                                                                       | Fungi(100);p_Basidiomycota(100);c_Agaricomycetes(100);o_Agaricales(100);f_Cortinariaceae(100);g_Cortinarius(100);s_Cortinarius_sp(100);                                                                      |
| Otu00826 | k                                                                                                       | Fungi(100);p_Ascomycota(100);c_Lecanoromycetes(100);o_unclassified_Lecanoromycetes(100);f_unclassified_Lecanoromycetes(100);g_unclassified_Lecanoromycetes(100);s_Lecanoromycetes_sp(100);                   |
| Otu00827 | k                                                                                                       | Fungi(100);p_Basidiomycota(100);c_Agaricomycetes(100);o_Hymenochaetales(100);f_Schizoporaceae(100);g_Hyphodontia(100);s_Hyphodontia_pallidula(100);                                                          |
| Otu00828 | k                                                                                                       | Fungi(100);p_Ascomycota(100);c_Leotiomycetes(100);o_Helotiales(100);f_unclassified_Helotiales(100);g_unclassified_Helotiales(100);s_Helotiales_sp(100);                                                      |
| Otu00829 | k                                                                                                       | Fungi(100);p_Basidiomycota(100);c_Agaricomycetes(100);o_Agaricales(100);f_Agaricaceae(100);g_Cystoderma(100);s_Cystoderma_aminanthinum(100);                                                                 |
| Otu00831 | unknown(100);unclassified(100);unclassified(100);unclassified(100);unclassified(100);unclassified(100); |                                                                                                                                                                                                              |
| Otu00832 | unknown(100);unclassified(100);unclassified(100);unclassified(100);unclassified(100);unclassified(100); |                                                                                                                                                                                                              |
| Otu00833 | k                                                                                                       | Fungi(100);p_Basidiomycota(100);c_Agaricomycetes(100);o_Agaricales(100);f_unclassified_Agaricales(100);g_unclassified_Agaricales(100);s_Agaricales_sp(100);                                                  |
| Otu00834 | k                                                                                                       | Fungi(100);p_Basidiomycota(100);c_Agaricomycetes(100);o_Hymenochaetales(100);f_Schizoporaceae(100);g_Hyphodontia(100);s_Hyphodontia_hastata(100);                                                            |
| Otu00835 | unknown(100);unclassified(100);unclassified(100);unclassified(100);unclassified(100);unclassified(100); |                                                                                                                                                                                                              |
| Otu00836 | k                                                                                                       | Fungi(100);p_Basidiomycota(100);c_Agaricomycetes(100);o_Thelephorales(100);f_Thelephoraceae(100);g_Tomentellopsis(100);s_Tomentellopsis_submollis(100);                                                      |
| Otu00837 | k                                                                                                       | Fungi(100);p_Basidiomycota(100);c_Agaricomycetes(100);o_Agaricales(100);f_Bolbitiaceae(100);g_Bolbitius(100);s_Bolbitius_reticulatus(100);                                                                   |
| Otu00838 | k                                                                                                       | Fungi(100);p_Basidiomycota(100);c_Agaricomycetes(100);o_Gloeophyllales(82);f_Gloeophyllaceae(82);g_Veluticeps(82);s_Veluticeps_berkeleyi(82);                                                                |
| Otu00839 | k                                                                                                       | Fungi(100);p_Zygomycota(100);c_Zygomycota_class_Incertae_sedis(100);o_Mortierellales(100);f_Mortierellaceae(100);g_Mortierella(100);s_Mortierella_sp(100);                                                   |
| Otu00840 | k                                                                                                       | Fungi(100);p_Basidiomycota(100);c_Agaricomycetes(100);o_Agaricales(100);f_Inocybaceae(100);g_Inocybe(100);s_Inocybe_fuscidula(100);                                                                          |
| Otu00841 | k                                                                                                       | Fungi(100);p_Basidiomycota(100);c_Agaricomycetes(100);o_Atheliales(100);f_Atheliaceae(100);g_unclassified_Atheliaceae(100);s_Atheliaceae_sp(100);                                                            |
| Otu00842 | k                                                                                                       | Fungi(100);p_Basidiomycota(100);c_Agaricomycetes(100);o_Agaricales(100);f_Cortinariaceae(100);g_Cortinarius(100);s_Cortinarius_sanguineus(100);                                                              |
| Otu00843 | k                                                                                                       | Fungi(100);p_Basidiomycota(100);c_Agaricomycetes(100);o_Atheliales(100);f_Atheliaceae(100);g_Fibulorhizoctonia(100);s_Fibulorhizoctonia_sp(100);                                                             |
| Otu00844 | k                                                                                                       | Fungi(100);p_Basidiomycota(100);c_Microbotryomycetes(100);o_Sporidiobolales(100);f_Sporidiobolales_family_Incertae_sedis(100);g_Rhodospodium(100);s_Rhodospodium_sp_MAC_2011(100);                           |
| Otu00845 | k                                                                                                       | Fungi(100);p_Ascomycota(100);c_Saccharomycetes(100);o_Saccharomycetales(100);f_Debaryomycetaceae(100);g_Priceomyces(100);s_Priceomyces_haplophilus(100);                                                     |
| Otu00846 | k                                                                                                       | Fungi(100);p_Basidiomycota(100);c_Agaricomycetes(100);o_Atheliales(100);f_Atheliaceae(100);g_unclassified_Atheliaceae(100);s_Atheliaceae_sp(100);                                                            |
| Otu00847 | unknown(100);unclassified(100);unclassified(100);unclassified(100);unclassified(100);unclassified(100); |                                                                                                                                                                                                              |
| Otu00848 | k                                                                                                       | Fungi(100);p_Ascomycota(100);c_Eurotiomycetes(100);o_Eurotiales(100);f_Elapohymetaceae(100);g_Elapomyces(100);s_Elapomyces_sp_GM_13_32(100);                                                                 |
| Otu00850 | k                                                                                                       | Fungi(100);p_Ascomycota(100);c_Eurotiomycetes(100);o_Eurotiales(100);f_Trichocomaceae(100);g_Penicillium(100);s_Penicillium_penicillioides(100);                                                             |
| Otu00851 | k                                                                                                       | Fungi(100);p_Basidiomycota(100);c_Agaricomycetes(100);o_Thelephorales(100);f_Thelephoraceae(100);g_Tomentella(100);s_Tomentella_subillacina(100);                                                            |
| Otu00852 | k                                                                                                       | Fungi(100);p_Basidiomycota(100);c_Agaricomycetes(61);o_unclassified_Agaricomycetes(61);f_unclassified_Agaricomycetes(61);g_unclassified_Agaricomycetes(61);s_Agaricomycetes_sp(61);                          |
| Otu00853 | k                                                                                                       | Fungi(100);p_Ascomycota(100);c_Sordariomycetes(100);o_Hypocreales(100);f_Nectriaceae(100);g_Volutella(100);s_Volutella_sp_SJ_2014(100);                                                                      |
| Otu00854 | k                                                                                                       | Fungi(100);p_Ascomycota(100);c_unclassified_Ascomycota(100);o_unclassified_Ascomycota(100);f_unclassified_Ascomycota(100);g_unclassified_Ascomycota(100);s_Ascomycota_sp(100);                               |
| Otu00855 | k                                                                                                       | Fungi(100);p_Ascomycota(100);c_Leotiomycetes(100);o_Helotiales(100);f_Dermateaceae(100);g_unclassified_Dermateaceae(100);s_Dermateaceae_sp(100);                                                             |
| Otu00857 | k                                                                                                       | Fungi(74);p_Basidiomycota(74);c_Agaricomycetes(74);o_Polyporales(74);f_Fomitopsidaceae(74);g_Anamoloma(74);s_Anamoloma_myceliosum(74);                                                                       |
| Otu00858 | k                                                                                                       | Fungi(100);p_Basidiomycota(100);c_Agaricomycetes(100);o_Agaricales(100);f_Cortinariaceae(100);g_Cortinarius(100);s_Cortinarius_sp(100);                                                                      |
| Otu00860 | k                                                                                                       | Fungi(100);p_Basidiomycota(100);c_Agaricomycetes(100);o_Agaricales(100);f_Cortinariaceae(100);g_Cortinarius(100);s_Cortinarius_sp(100);                                                                      |
| Otu00861 | k                                                                                                       | Fungi(100);p_Basidiomycota(100);c_Agaricomycetes(100);o_Auriculariales(100);f_Auriculariales_family_Incertae_sedis(100);g_Auricularia(100);s_Auricularia_sp(100);                                            |
| Otu00862 | k                                                                                                       | Fungi(100);p_Zygomycota(100);c_Zygomycota_class_Incertae_sedis(100);o_Mucorales(100);f_Umbelopsidaceae(100);g_Umbelopsis(100);s_Umbelopsis_angularis(80);                                                    |
| Otu00863 | k                                                                                                       | Fungi(100);p_Basidiomycota(100);c_Microbotryomycetes(100);o_unclassified_Microbotryomycetes(100);f_unclassified_Microbotryomycetes(100);g_unclassified_Microbotryomycetes(100);s_Microbotryomycetes_sp(100); |
| Otu00864 | k                                                                                                       | Fungi(100);p_Ascomycota(100);c_unclassified_Ascomycota(100);o_unclassified_Ascomycota(100);f_unclassified_Ascomycota(100);g_unclassified_Ascomycota(100);s_Ascomycota_sp(100);                               |
| Otu00865 | k                                                                                                       | Fungi(100);p_Basidiomycota(100);c_Agaricomycetes(100);o_Auriculariales(100);f_unclassified_Auriculariales(100);g_unclassified_Auriculariales(100);s_Auriculariales_sp(100);                                  |
| Otu00866 | k                                                                                                       | Fungi(100);p_Basidiomycota(100);c_Agaricomycetes(100);o_Agaricales(100);f_Hygrophoraceae(100);g_Hygrocybe(100);s_Hygrocybe_laeta(100);                                                                       |
| Otu00867 | k                                                                                                       | Fungi(100);p_Ascomycota(100);c_Leotiomycetes(100);o_Helotiales(100);f_Dermateaceae(100);g_unclassified_Dermateaceae(100);s_Dermateaceae_sp(100);                                                             |
| Otu00868 | k                                                                                                       | Fungi(100);p_Basidiomycota(100);c_unclassified_Basidiomycota(100);o_unclassified_Basidiomycota(100);f_unclassified_Basidiomycota(100);g_unclassified_Basidiomycota(100);s_Basidiomycota_sp(100);             |
| Otu00869 | unknown(100);unclassified(100);unclassified(100);unclassified(100);unclassified(100);unclassified(100); |                                                                                                                                                                                                              |
| Otu00870 | k                                                                                                       | Fungi(100);p_Basidiomycota(100);c_Agaricomycetes(100);o_Thelephorales(100);f_Thelephoraceae(100);g_unclassified_Thelephoraceae(100);s_Thelephoraceae_sp(100);                                                |
| Otu00871 | k                                                                                                       | Fungi(100);p_Ascomycota(100);c_Eurotiomycetes(100);o_Chaetothyriales(100);f_Chaetothyriales(100);g_unclassified_Chaetothyriales(100);s_Chaetothyriales_sp(100);                                              |
| Otu00872 | unknown(100);unclassified(100);unclassified(100);unclassified(100);unclassified(100);unclassified(100); |                                                                                                                                                                                                              |
| Otu00873 | k                                                                                                       | Fungi(94);p_Chytridiomycota(94);c_Chytridiomycetes(94);o_Spizellomycetales(94);f_Spizellomycetaceae(94);g_Spizellomyces(94);s_Spizellomyces_sp(94);                                                          |
| Otu00874 | k                                                                                                       | Fungi(100);p_Ascomycota(100);c_Leotiomycetes(100);o_Helotiales(100);f_unclassified_Helotiales(100);g_unclassified_Helotiales(100);s_Helotiales_sp(100);                                                      |
| Otu00875 | k                                                                                                       | Fungi(100);p_Basidiomycota(100);c_Agaricomycetes(100);o_Trechisporales(100);f_Hydnotodontaceae(100);g_Trechispora(100);s_Trechispora_sp(100);                                                                |
| Otu00876 | k                                                                                                       | Fungi(100);p_Ascomycota(100);c_Saccharomycetes(100);o_Saccharomycetales(100);f_Trichomonasacaceae(100);g_Blastobotrys(100);s_Blastobotrys_mokoenai(100);                                                     |
| Otu00877 | k                                                                                                       | Fungi(100);p_Basidiomycota(100);c_Agaricomycetes(100);o_Auriculariales(100);f_unclassified_Auriculariales(100);g_unclassified_Auriculariales(100);s_Auriculariales_sp(100);                                  |
| Otu00878 | k                                                                                                       | Fungi(100);p_Ascomycota(100);c_Leotiomycetes(100);o_Helotiales(100);f_unclassified_Helotiales(100);g_unclassified_Helotiales(100);s_Helotiales_sp(100);                                                      |

Supplementary, TableS1A  
 Taxonomy of OTUs  
 Normalized data, identification according to blast UNITEv57

|          |                                                                                                         |              |                           |                                        |                                                                        |                                                                            |                                         |                                                   |
|----------|---------------------------------------------------------------------------------------------------------|--------------|---------------------------|----------------------------------------|------------------------------------------------------------------------|----------------------------------------------------------------------------|-----------------------------------------|---------------------------------------------------|
| Otu00879 | k                                                                                                       | Fungi(100);p | Ascomycota(100);c         | Leotiomycetes(100);o                   | Helotiales(100);f                                                      | unclassified_Helotiales(100);g                                             | unclassified_Helotiales(100);s          | Helotiales_sp(100);                               |
| Otu00880 | k                                                                                                       | Fungi(100);p | Basidiomycota(100);c      | Agaricomycetes(100);o                  | Hymenochaetales(100);f                                                 | Schizoporaceae(100);g                                                      | Hyphodontia(100);s                      | Hyphodontia_hastata(100);                         |
| Otu00882 | k                                                                                                       | Fungi(100);p | Basidiomycota(100);c      | Agaricomycetes(100);o                  | Auriculariales(100);f                                                  | unclassified_Auriculariales(100);g                                         | unclassified_Auriculariales(100);s      | Auriculariales_sp(100);                           |
| Otu00883 | k                                                                                                       | Fungi(94);p  | Basidiomycota(94);c       | Tritirachiomycetes(87);o               | Tritirachiomycetes_order_Incertae_sedis(87);f                          | Tritirachiomycetes_family_Incertae_sedis(87);g                             | Paratritirachium(87);s                  | Paratritirachium_sp(87);                          |
| Otu00884 | k                                                                                                       | Fungi(100);p | Ascomycota(100);c         | Eurotiomycetes(100);o                  | Chaetothyriales(100);f                                                 | unclassified_Chaetothyriales(100);g                                        | unclassified_Chaetothyriales(100);s     | Chaetothyriales_sp(100);                          |
| Otu00885 | k                                                                                                       | Fungi(93);p  | Rozellomycota(93);c       | unclassified_Rozellomycota(93);o       | unclassified_Rozellomycota(93);f                                       | unclassified_Rozellomycota(93);g                                           | unclassified_Rozellomycota(93);s        | Rozellomycota_sp(93);                             |
| Otu00886 | k                                                                                                       | Fungi(100);p | unclassified_Fungi(100);c | unclassified_Fungi(100);o              | unclassified_Fungi(100);f                                              | unclassified_Fungi(100);g                                                  | unclassified_Fungi(100);s               | Fungi_sp(100);                                    |
| Otu00887 | k                                                                                                       | Fungi(100);p | Basidiomycota(100);c      | Agaricomycetes(100);o                  | Russulales(100);f                                                      | Russulaceae(100);g                                                         | Russula(58);unclassified(100);          |                                                   |
| Otu00888 | k                                                                                                       | Fungi(100);p | Chytridiomycota(100);c    | unclassified_Chytridiomycota(100);o    | unclassified_Chytridiomycota(100);f                                    | unclassified_Chytridiomycota(100);g                                        | unclassified_Chytridiomycota(100);s     | Chytridiomycota_sp(100);                          |
| Otu00890 | k                                                                                                       | Fungi(100);p | Zygomycota(100);c         | Zygomycota_class_Incertae_sedis(100);o | Mortierellales(100);f                                                  | Mortierellaceae(100);g                                                     | Mortierella(100);s                      | Mortierella_sp(100);                              |
| Otu00891 | k                                                                                                       | Fungi(93);p  | Ascomycota(93);c          | Pezizomycetes(93);o                    | Pezizales(93);f                                                        | Pyrenomataceae(93);g                                                       | Geopora(93);s                           | Geopora_sp(93);                                   |
| Otu00892 | k                                                                                                       | Fungi(100);p | Basidiomycota(100);c      | Agaricomycetes(100);o                  | Agaricales(100);f                                                      | Psathyrellaceae(100);g                                                     | Psathyrella(100);s                      | Psathyrella_rostellata(100);                      |
| Otu00893 | k                                                                                                       | Fungi(100);p | Ascomycota(100);c         | Leotiomycetes(100);o                   | Helotiales(100);f                                                      | Helotiaceae(100);g                                                         | unclassified_Helotiaceae(100);s         | Helotiaceae_sp(100);                              |
| Otu00894 | k                                                                                                       | Fungi(72);p  | Ascomycota(72);c          | Dothideomycetes(65);o                  | Pleosporales(65);f                                                     | Pleosporaceae(65);g                                                        | Curvularia(65);s                        | Curvularia_sp_LH3(65);                            |
| Otu00895 | k                                                                                                       | Fungi(100);p | Ascomycota(100);c         | Leotiomycetes(100);o                   | Helotiales(100);unclassified(100);unclassified(100);unclassified(100); |                                                                            |                                         |                                                   |
| Otu00896 | k                                                                                                       | Fungi(100);p | Zygomycota(100);c         | Zygomycota_class_Incertae_sedis(100);o | Mortierellales(100);f                                                  | Mortierellaceae(100);g                                                     | Mortierella(100);s                      | Mortierella_sp(100);                              |
| Otu00897 | k                                                                                                       | Fungi(100);p | Ascomycota(100);c         | Dothideomycetes(79);o                  | Dothideomycetes_order_Incertae_sedis(79);f                             | Pseudeurotiaceae(79);g                                                     | Pseudogymnoascus(79);s                  | Pseudogymnoascus_roseus(65);                      |
| Otu00898 | k                                                                                                       | Fungi(100);p | Ascomycota(100);c         | Saccharomycetes(100);o                 | Saccharomycetales(100);f                                               | unclassified_Saccharomycetales(100);g                                      | unclassified_Saccharomycetales(100);s   | Saccharomycetales_sp(100);                        |
| Otu00899 | k                                                                                                       | Fungi(100);p | Basidiomycota(100);c      | Agaricomycetes(100);o                  | Sebacinales(100);f                                                     | Sebacinales_Group_B(100);g                                                 | unclassified_Sebacinales_Group_B(100);s | Sebacinales_Group_B_sp(100);                      |
| Otu00900 | k                                                                                                       | Fungi(100);p | Basidiomycota(100);c      | unclassified_Basidiomycota(100);o      | unclassified_Basidiomycota(100);f                                      | unclassified_Basidiomycota(100);g                                          | unclassified_Basidiomycota(100);s       | Basidiomycota_sp(100);                            |
| Otu00901 | k                                                                                                       | Fungi(100);p | Ascomycota(100);c         | Leotiomycetes(100);o                   | Helotiales(100);f                                                      | unclassified_Helotiales(100);g                                             | unclassified_Helotiales(100);s          | Helotiales_sp(100);                               |
| Otu00902 | k                                                                                                       | Fungi(100);p | Ascomycota(100);c         | Sordariomycetes(100);o                 | Chaetosphaeriales(100);f                                               | unclassified_Chaetosphaeriales(100);g                                      | unclassified_Chaetosphaeriales(100);s   | Chaetosphaeriales_sp(100);                        |
| Otu00903 | k                                                                                                       | Fungi(100);p | Ascomycota(100);c         | Dothideomycetes(100);o                 | Pleosporales(100);f                                                    | Tubeufiaceae(100);g                                                        | Acanthostigma(100);s                    | Acanthostigma_multisetatum(100);                  |
| Otu00904 | k                                                                                                       | Fungi(100);p | Basidiomycota(100);c      | Tremellomycetes(100);o                 | Tremellales(100);f                                                     | Tremellales_family_Incertae_sedis(100);g                                   | Tremella(100);s                         | Tremella_microspora(100);                         |
| Otu00905 | k                                                                                                       | Fungi(100);p | Ascomycota(100);c         | Eurotiomycetes(100);o                  | Chaetothyriales(100);f                                                 | unclassified_Chaetothyriales(100);g                                        | unclassified_Chaetothyriales(100);s     | Chaetothyriales_sp(100);                          |
| Otu00906 | k                                                                                                       | Fungi(100);p | Ascomycota(100);c         | Eurotiomycetes(100);o                  | Chaetothyriales(100);f                                                 | unclassified_Chaetothyriales(100);g                                        | unclassified_Chaetothyriales(100);s     | Chaetothyriales_sp(100);                          |
| Otu00907 | k                                                                                                       | Fungi(100);p | Basidiomycota(100);c      | Tremellomycetes(100);o                 | Filobasidiales(100);f                                                  | Filobasidiaceae(100);g                                                     | Cryptococcus(100);s                     | Cryptococcus_sp(100);                             |
| Otu00908 | k                                                                                                       | Fungi(100);p | Ascomycota(100);c         | Sordariomycetes(86);o                  | unclassified_Sordariomycetes(79);f                                     | unclassified_Sordariomycetes(79);g                                         | unclassified_Sordariomycetes(79);s      | Sordariomycetes_sp(79);                           |
| Otu00909 | k                                                                                                       | Fungi(100);p | Ascomycota(100);c         | Leotiomycetes(100);o                   | Helotiales(100);f                                                      | Helotiales_family_Incertae_sedis(100);unclassified(100);unclassified(100); |                                         |                                                   |
| Otu00911 | k                                                                                                       | Fungi(100);p | Ascomycota(100);c         | Sordariomycetes(100);o                 | Hypocreales(100);f                                                     | Clavicipitaceae(100);g                                                     | Metarhizium(100);s                      | Metarhizium_flavoviride_var_novazealandicum(100); |
| Otu00912 | k                                                                                                       | Fungi(93);p  | Glomeromycota(93);c       | Glomeromycetes(93);o                   | Archaeosporales(93);f                                                  | Archaeosporaceae(93);g                                                     | unclassified_Archaeosporaceae(93);s     | Archaeosporaceae_sp(93);                          |
| Otu00913 | k                                                                                                       | Fungi(100);p | Basidiomycota(100);c      | Agaricomycetes(100);o                  | Thelephorales(100);f                                                   | Thelephoraceae(100);g                                                      | unclassified_Thelephoraceae(100);s      | Thelephoraceae_sp(100);                           |
| Otu00914 | unknown(100);unclassified(100);unclassified(100);unclassified(100);unclassified(100);unclassified(100); |              |                           |                                        |                                                                        |                                                                            |                                         |                                                   |
| Otu00915 | k                                                                                                       | Fungi(100);p | Ascomycota(100);c         | Dothideomycetes(100);o                 | unclassified_Dothideomycetes(93);f                                     | unclassified_Dothideomycetes(93);g                                         | unclassified_Dothideomycetes(93);s      | Dothideomycetes_sp(93);                           |
| Otu00916 | k                                                                                                       | Fungi(100);p | Basidiomycota(100);c      | Agaricomycetes(100);o                  | Agaricales(62);f                                                       | Hydnangiaceae(62);g                                                        | Laccaria(62);s                          | Laccaria_pseudomontana(62);                       |
| Otu00917 | k                                                                                                       | Fungi(100);p | Ascomycota(100);c         | Leotiomycetes(100);o                   | Helotiales(100);f                                                      | Dermateaceae(100);g                                                        | unclassified_Dermateaceae(100);s        | Dermateaceae_sp(100);                             |
| Otu00918 | k                                                                                                       | Fungi(100);p | Basidiomycota(100);c      | Agaricomycetes(100);o                  | Cantharellales(100);f                                                  | Clavulinaceae(100);g                                                       | Clavulina(100);s                        | Clavulina_sp(100);                                |
| Otu00919 | k                                                                                                       | Fungi(100);p | Ascomycota(100);c         | Sordariomycetes(100);o                 | unclassified_Sordariomycetes(100);f                                    | unclassified_Sordariomycetes(100);g                                        | unclassified_Sordariomycetes(100);s     | Sordariomycetes_sp(100);                          |
| Otu00920 | k                                                                                                       | Fungi(100);p | Basidiomycota(100);c      | Microbotryomycetes(100);o              | Sporidiobolales(100);f                                                 | Sporidiobolales_family_Incertae_sedis(100);g                               | Rhodotorula(100);s                      | Rhodotorula_auriculariae(77);                     |
| Otu00921 | k                                                                                                       | Fungi(100);p | Basidiomycota(100);c      | Agaricomycetes(100);o                  | Hymenochaetales(100);f                                                 | Hymenochaetales(100);g                                                     | Phellopilus(100);s                      | Phellopilus_nigrolimitatus(100);                  |
| Otu00923 | k                                                                                                       | Fungi(100);p | Basidiomycota(100);c      | Agaricomycetes(100);o                  | Agaricales(100);f                                                      | Cortinariaceae(100);g                                                      | Cortinarius(100);s                      | Cortinarius_sp(100);                              |
| Otu00924 | k                                                                                                       | Fungi(85);p  | unclassified_Fungi(85);c  | unclassified_Fungi(85);o               | unclassified_Fungi(85);f                                               | unclassified_Fungi(85);g                                                   | unclassified_Fungi(85);s                | Fungi_sp(85);                                     |
| Otu00925 | k                                                                                                       | Fungi(85);p  | Ascomycota(85);c          | Dothideomycetes(77);o                  | Botryosphaeriales(77);f                                                | unclassified_Botryosphaeriales(77);g                                       | unclassified_Botryosphaeriales(77);s    | Botryosphaeriales_sp(77);                         |
| Otu00926 | k                                                                                                       | Fungi(62);p  | Glomeromycota(62);c       | Glomeromycetes(62);o                   | Glomerales(62);f                                                       | Glomeraceae(62);g                                                          | unclassified_Glomeraceae(62);s          | Glomeraceae_sp(62);                               |
| Otu00927 | unknown(100);unclassified(100);unclassified(100);unclassified(100);unclassified(100);unclassified(100); |              |                           |                                        |                                                                        |                                                                            |                                         |                                                   |
| Otu00928 | k                                                                                                       | Fungi(100);p | Basidiomycota(100);c      | Tremellomycetes(100);o                 | unclassified_Tremellomycetes(100);f                                    | unclassified_Tremellomycetes(100);g                                        | unclassified_Tremellomycetes(100);s     | Tremellomycetes_sp(100);                          |
| Otu00929 | k                                                                                                       | Fungi(100);p | Ascomycota(100);c         | Leotiomycetes(100);o                   | Helotiales(100);f                                                      | Dermateaceae(100);g                                                        | Mollisia(100);s                         | Mollisia_cinerea_f_minutella(100);                |
| Otu00930 | k                                                                                                       | Fungi(93);p  | Basidiomycota(93);c       | Agaricomycetes(93);o                   | Auriculariales(93);f                                                   | unclassified_Auriculariales(93);g                                          | unclassified_Auriculariales(93);s       | Auriculariales_sp(93);                            |
| Otu00931 | k                                                                                                       | Fungi(100);p | Basidiomycota(100);c      | Microbotryomycetes(100);o              | unclassified_Microbotryomycetes(100);f                                 | unclassified_Microbotryomycetes(100);g                                     | unclassified_Microbotryomycetes(100);s  | Microbotryomycetes_sp(100);                       |
| Otu00932 | k                                                                                                       | Fungi(70);p  | unclassified_Fungi(70);c  | unclassified_Fungi(70);o               | unclassified_Fungi(70);f                                               | unclassified_Fungi(70);g                                                   | unclassified_Fungi(70);s                | Fungi_sp(70);                                     |
| Otu00933 | k                                                                                                       | Fungi(85);p  | Ascomycota(85);c          | Saccharomycetes(85);o                  | Saccharomycetales(85);f                                                | Dipodascaceae(85);g                                                        | Basidioascus(85);s                      | Basidioascus_magus(85);                           |
| Otu00934 | k                                                                                                       | Fungi(100);p | Ascomycota(100);c         | unclassified_Ascomycota(100);o         | unclassified_Ascomycota(100);f                                         | unclassified_Ascomycota(100);g                                             | unclassified_Ascomycota(100);s          | Ascomycota_sp(100);                               |
| Otu00935 | k                                                                                                       | Fungi(100);p | Basidiomycota(100);c      | Agaricomycetes(100);o                  | Russulales(100);f                                                      | Albatrellaceae(100);g                                                      | Albatrellus(100);s                      | Albatrellus_ovinus(100);                          |
| Otu00936 | k                                                                                                       | Fungi(100);p | Basidiomycota(100);c      | Agaricomycetes(100);o                  | Agaricales(100);f                                                      | Mycenaceae(100);g                                                          | unclassified_Mycenaceae(100);s          | Mycenaceae_sp(100);                               |
| Otu00937 | k                                                                                                       | Fungi(54);p  | unclassified_Fungi(54);c  | unclassified_Fungi(54);o               | unclassified_Fungi(54);f                                               | unclassified_Fungi(54);g                                                   | unclassified_Fungi(54);s                | Fungi_sp(54);                                     |
| Otu00938 | k                                                                                                       | Fungi(100);p | Ascomycota(100);c         | Leotiomycetes(100);o                   | Helotiales(100);f                                                      | unclassified_Helotiales(100);g                                             | unclassified_Helotiales(100);s          | Helotiales_sp(100);                               |
| Otu00939 | k                                                                                                       | Fungi(100);p | Ascomycota(100);c         | Dothideomycetes(100);o                 | Dothideomycetes_order_Incertae_sedis(100);f                            | Myxotrichaceae(100);g                                                      | Oidiodendron(100);s                     | Oidiodendron_chlamydosporicum(62);                |
| Otu00940 | k                                                                                                       | Fungi(100);p | Basidiomycota(100);c      | Agaricomycetes(100);o                  | Agaricales(100);f                                                      | Hygrophoraceae(100);g                                                      | Hygrophorus(100);s                      | Hygrophorus_hypothejus(100);                      |
| Otu00941 | k                                                                                                       | Fungi(100);p | Basidiomycota(100);c      | Microbotryomycetes(100);o              | Sporidiobolales(100);f                                                 | Sporidiobolales_family_Incertae_sedis(100);g                               | Rhodotorula(100);s                      | Rhodotorula_lamellibrachiae(100);                 |
| Otu00942 | k                                                                                                       | Fungi(100);p | Ascomycota(100);c         | unclassified_Ascomycota(100);o         | unclassified_Ascomycota(100);f                                         | unclassified_Ascomycota(100);g                                             | unclassified_Ascomycota(100);s          | Ascomycota_sp(100);                               |
| Otu00943 | k                                                                                                       | Fungi(100);p | Basidiomycota(100);c      | Agaricomycetes(100);o                  | Trechisporales(100);f                                                  | Hydnodontaceae(100);g                                                      | Trechispora(100);s                      | Trechispora_sp(100);                              |
| Otu00944 | k                                                                                                       | Fungi(100);p | Basidiomycota(100);c      | Agaricomycetes(100);o                  | Agaricales(100);f                                                      | Physalacriaceae(100);g                                                     | Cylindrobasidium(100);s                 | Cylindrobasidium_evolsens(100);                   |
| Otu00946 | k                                                                                                       | Fungi(100);p | Ascomycota(100);c         | Dothideomycetes(100);o                 | Capnodiales(100);f                                                     | unclassified_Capnodiales(100);g                                            | unclassified_Capnodiales(100);s         | Capnodiales_sp(100);                              |
| Otu00947 | k                                                                                                       | Fungi(100);p | Ascomycota(100);c         | Leotiomycetes(100);o                   | Helotiales(100);f                                                      | unclassified_Helotiales(100);g                                             | unclassified_Helotiales(100);s          | Helotiales_sp(100);                               |
| Otu00948 | k                                                                                                       | Fungi(100);p | Basidiomycota(100);c      | Agaricomycetes(100);o                  | Agaricales(100);f                                                      | Cortinariaceae(100);g                                                      | Cortinarius(100);s                      | Cortinarius_alboviolaecus(85);                    |
| Otu00949 | k                                                                                                       | Fungi(93);p  | Ascomycota(93);c          | Sordariomycetes(93);o                  | Ophiostomatales(93);f                                                  | Ophiostomataceae(93);g                                                     | Leptographium(93);s                     | Leptographium_piriforme(93);                      |

Supplementary, TableS1A  
 Taxonomy of OTUs  
 Normalized data, identification according to blast UNITEv57

|          |                                                                                                                           |              |                           |                                        |                                             |                                              |                                         |                                   |
|----------|---------------------------------------------------------------------------------------------------------------------------|--------------|---------------------------|----------------------------------------|---------------------------------------------|----------------------------------------------|-----------------------------------------|-----------------------------------|
| Otu00950 | k                                                                                                                         | Fungi(93);p  | Basidiomycota(93);c       | Agaricomycetes(93);o                   | Atheliales(93);f                            | Atheliaceae(93);g                            | unclassified Atheliaceae(93);s          | Atheliaceae sp(93);               |
| Otu00951 | k                                                                                                                         | Fungi(100);p | Basidiomycota(100);c      | Agaricomycetes(100);o                  | unclassified Agaricomycetes(100);f          | unclassified Agaricomycetes(100);g           | unclassified Agaricomycetes(100);s      | Agaricomycetes sp(100);           |
| Otu00952 | k                                                                                                                         | Fungi(100);p | Basidiomycota(100);c      | Agaricomycetes(100);o                  | Agaricales(100);f                           | Hygrophoraceae(100);g                        | Hygrophorus(100);s                      | Hygrophorus piceae(100);          |
| Otu00953 | k                                                                                                                         | Fungi(100);p | Basidiomycota(100);c      | Agaricomycetes(100);o                  | Trechisporales(100);f                       | Hydnodontaceae(100);g                        | unclassified Hydnodontaceae(100);s      | Hydnodontaceae sp(100);           |
| Otu00955 | k                                                                                                                         | Fungi(100);p | Basidiomycota(100);c      | Microbotryomycetes(100);o              | Sporidiobolales(100);f                      | Sporidiobolales family Incertae sedis(100);g | Rhodotorula(100);s                      | Rhodotorula cycloclastica(100);   |
| Otu00957 | k                                                                                                                         | Fungi(100);p | Ascomycota(100);c         | Leotiomycetes(100);o                   | Helotiales(100);f                           | unclassified Helotiales(100);g               | unclassified Helotiales(100);s          | Helotiales sp(100);               |
| Otu00959 | k                                                                                                                         | Fungi(92);p  | Chytridiomycota(92);c     | unclassified Chytridiomycota(92);o     | unclassified Chytridiomycota(92);f          | unclassified Chytridiomycota(92);g           | unclassified Chytridiomycota(92);s      | Chytridiomycota sp(92);           |
| Otu00960 | k                                                                                                                         | Fungi(92);p  | Ascomycota(92);c          | Pezizomycetes(92);o                    | Pezizales(92);f                             | Pyronemataceae(92);g                         | Geopora(75);s                           | Geopora sp(75);                   |
| Otu00961 | k                                                                                                                         | Fungi(100);p | Basidiomycota(100);c      | Agaricomycetes(100);o                  | Russulales(100);f                           | Russulaceae(100);g                           | Russula(100);s                          | Russula sp H02(100);              |
| Otu00962 | k                                                                                                                         | Fungi(100);p | Chytridiomycota(100);c    | unclassified Chytridiomycota(100);o    | unclassified Chytridiomycota(100);f         | unclassified Chytridiomycota(100);g          | unclassified Chytridiomycota(100);s     | Chytridiomycota sp(100);          |
| Otu00963 | k                                                                                                                         | Fungi(100);p | Ascomycota(100);c         | Leotiomycetes(100);o                   | Helotiales(100);f                           | Hyaloscyphaceae(92);g                        | Hyaloscypha(92);s                       | Hyaloscypha sp(92);               |
| Otu00964 | k                                                                                                                         | Fungi(100);p | Basidiomycota(100);c      | Microbotryomycetes(100);o              | Sporidiobolales(84);f                       | Sporidiobolales family Incertae sedis(84);g  | Rhodotorula(84);s                       | Rhodotorula lignophila(84);       |
| Otu00965 | k                                                                                                                         | Fungi(100);p | Basidiomycota(100);c      | Tremellomycetes(100);o                 | Filobasidiales(100);f                       | Filobasidiaceae(100);g                       | Cryptococcus(100);s                     | Cryptococcus terricola(100);      |
| Otu00966 | k                                                                                                                         | Fungi(100);p | Ascomycota(100);c         | Leotiomycetes(100);o                   | Helotiales(100);f                           | unclassified Helotiales(100);g               | unclassified Helotiales(100);s          | Helotiales sp(100);               |
| Otu00967 | k                                                                                                                         | Fungi(100);p | Basidiomycota(100);c      | Agaricomycetes(100);o                  | Russulales(100);f                           | Russulaceae(100);g                           | Lactarius(100);s                        | Lactarius sp(100);                |
| Otu00968 | unknown(100);unclassified(100);unclassified(100);unclassified(100);unclassified(100);unclassified(100);unclassified(100); |              |                           |                                        |                                             |                                              |                                         |                                   |
| Otu00969 | k                                                                                                                         | Fungi(100);p | Ascomycota(100);c         | Eurotiomycetes(100);o                  | Chaetothyriales(100);f                      | Herpotrichiellaceae(100);g                   | unclassified Herpotrichiellaceae(100);s | Herpotrichiellaceae sp(100);      |
| Otu00970 | k                                                                                                                         | Fungi(100);p | Basidiomycota(100);c      | Agaricomycetes(100);o                  | Russulales(100);f                           | Russulaceae(100);g                           | Russula(100);s                          | Russula sanguinea(100);           |
| Otu00971 | k                                                                                                                         | Fungi(100);p | Basidiomycota(100);c      | unclassified Basidiomycota(100);o      | unclassified Basidiomycota(100);f           | unclassified Basidiomycota(100);g            | unclassified Basidiomycota(100);s       | Basidiomycota sp(100);            |
| Otu00972 | k                                                                                                                         | Fungi(100);p | Basidiomycota(100);c      | Agaricomycetes(100);o                  | Agaricales(100);f                           | unclassified Agaricales(100);g               | unclassified Agaricales(100);s          | Agaricales sp(100);               |
| Otu00973 | k                                                                                                                         | Fungi(100);p | Basidiomycota(100);c      | Agaricomycetes(100);o                  | Agaricales(100);f                           | Entolomataceae(100);g                        | Entoloma(100);s                         | Entoloma sp AJ108(100);           |
| Otu00974 | unknown(100);unclassified(100);unclassified(100);unclassified(100);unclassified(100);unclassified(100);unclassified(100); |              |                           |                                        |                                             |                                              |                                         |                                   |
| Otu00975 | k                                                                                                                         | Fungi(92);p  | Ascomycota(92);c          | Saccharomycetes(92);o                  | Saccharomycetales(92);f                     | Saccharomycetales(92);g                      | Vanderwaltozyma(92);s                   | Vanderwaltozyma sp LCF_03(92);    |
| Otu00976 | k                                                                                                                         | Fungi(100);p | Ascomycota(100);c         | Leotiomycetes(100);o                   | Helotiales(100);f                           | Hyaloscyphaceae(100);g                       | unclassified Hyaloscyphaceae(100);s     | Hyaloscyphaceae sp(100);          |
| Otu00977 | k                                                                                                                         | Fungi(100);p | Ascomycota(100);c         | unclassified Ascomycota(100);o         | unclassified Ascomycota(100);f              | unclassified Ascomycota(100);g               | unclassified Ascomycota(100);s          | Ascomycota sp(100);               |
| Otu00978 | k                                                                                                                         | Fungi(100);p | Ascomycota(100);c         | Sordariomycetes(100);o                 | Ophiostomatales(100);f                      | Ophiostomataceae(100);g                      | unclassified Ophiostomataceae(100);s    | Ophiostomataceae sp(100);         |
| Otu00979 | k                                                                                                                         | Fungi(100);p | Basidiomycota(100);c      | Agaricomycetes(100);o                  | Hymenochaetales(100);f                      | Hymenochaetales(100);g                       | Phellipilus(100);s                      | Phellipilus nigrolimitatus(100);  |
| Otu00981 | k                                                                                                                         | Fungi(100);p | Ascomycota(100);c         | unclassified Ascomycota(100);o         | unclassified Ascomycota(100);f              | unclassified Ascomycota(100);g               | unclassified Ascomycota(100);s          | Ascomycota sp(100);               |
| Otu00982 | k                                                                                                                         | Fungi(100);p | Ascomycota(100);c         | Pezizomycetes(100);o                   | Pezizales(100);f                            | Pyronemataceae(100);g                        | Geopora(100);s                          | Geopora sp(100);                  |
| Otu00983 | k                                                                                                                         | Fungi(100);p | Ascomycota(100);c         | Ascomycota class Incertae sedis(100);o | Ascomycota order Incertae sedis(100);f      | Ascomycota family Incertae sedis(100);g      | Spegazzinia(100);s                      | Spegazzinia sp(100);              |
| Otu00984 | k                                                                                                                         | Fungi(100);p | unclassified Fungi(100);c | unclassified Fungi(100);o              | unclassified Fungi(100);f                   | unclassified Fungi(100);g                    | unclassified Fungi(100);s               | Fungi sp(100);                    |
| Otu00985 | k                                                                                                                         | Fungi(100);p | Ascomycota(100);c         | Sordariomycetes(100);o                 | Xylariales(67);f                            | Hyponectriaceae(67);g                        | Phyalospora(67);s                       | Phyalospora vaccinii(67);         |
| Otu00986 | unknown(100);unclassified(100);unclassified(100);unclassified(100);unclassified(100);unclassified(100);                   |              |                           |                                        |                                             |                                              |                                         |                                   |
| Otu00987 | k                                                                                                                         | Fungi(84);p  | Glomeromycota(84);c       | Glomeromycetes(84);o                   | Archaeosporales(84);f                       | Archaeosporaceae(84);g                       | unclassified Archaeosporaceae(84);s     | Archaeosporaceae sp(84);          |
| Otu00988 | k                                                                                                                         | Fungi(100);p | Basidiomycota(100);c      | Agaricomycetes(100);o                  | Telephorales(100);f                         | Telephoraceae(100);g                         | Tomentella(100);s                       | Tomentella sp(100);               |
| Otu00989 | k                                                                                                                         | Fungi(100);p | Basidiomycota(100);c      | Agaricomycetes(100);o                  | Agaricales(100);f                           | Cortinariaceae(100);g                        | Cortinarius(100);s                      | Cortinarius sp(100);              |
| Otu00990 | k                                                                                                                         | Fungi(100);p | Basidiomycota(100);c      | Agaricomycetes(100);o                  | Agaricales(100);f                           | Strophariaceae(100);g                        | Gymnopilus(100);s                       | Gymnopilus picreus(100);          |
| Otu00991 | k                                                                                                                         | Fungi(100);p | Ascomycota(100);c         | unclassified Ascomycota(100);o         | unclassified Ascomycota(100);f              | unclassified Ascomycota(100);g               | unclassified Ascomycota(100);s          | Ascomycota sp(100);               |
| Otu00992 | k                                                                                                                         | Fungi(82);p  | Basidiomycota(82);c       | Agaricomycetes(82);o                   | Sebacinales(82);f                           | unclassified Sebacinales(82);g               | unclassified Sebacinales(82);s          | Sebacinales sp(82);               |
| Otu00993 | k                                                                                                                         | Fungi(91);p  | Basidiomycota(91);c       | Agaricomycetes(91);o                   | unclassified Agaricomycetes(91);f           | unclassified Agaricomycetes(91);g            | unclassified Agaricomycetes(91);s       | Agaricomycetes sp(91);            |
| Otu00994 | k                                                                                                                         | Fungi(100);p | Ascomycota(100);c         | Eurotiomycetes(100);o                  | Chaetothyriales(100);f                      | Herpotrichiellaceae(100);g                   | Cladophialophora(100);s                 | Cladophialophora sp(100);         |
| Otu00995 | k                                                                                                                         | Fungi(100);p | Basidiomycota(100);c      | Agaricomycetes(100);o                  | Russulales(100);f                           | Russulaceae(100);g                           | Russula(100);s                          | Russula vitellina(100);           |
| Otu00996 | unknown(82);unclassified(82);unclassified(82);unclassified(82);unclassified(82);unclassified(82);                         |              |                           |                                        |                                             |                                              |                                         |                                   |
| Otu00997 | k                                                                                                                         | Fungi(100);p | Ascomycota(100);c         | Leotiomycetes(100);o                   | Helotiales(100);f                           | Vibrissaceae(100);g                          | Phialocephala(100);s                    | Phialocephala sphaeroides(100);   |
| Otu00998 | k                                                                                                                         | Fungi(100);p | Basidiomycota(100);c      | Agaricomycetes(100);o                  | unclassified Agaricomycetes(100);f          | unclassified Agaricomycetes(100);g           | unclassified Agaricomycetes(100);s      | Agaricomycetes sp(100);           |
| Otu00999 | k                                                                                                                         | Fungi(100);p | Basidiomycota(100);c      | Agaricomycetes(100);o                  | Agaricales(100);f                           | Inocybaceae(100);g                           | Inocybe(100);s                          | Inocybe renispora(100);           |
| Otu01000 | k                                                                                                                         | Fungi(100);p | Basidiomycota(100);c      | Agaricomycetes(100);o                  | Hymenochaetales(100);f                      | Hymenochaetales family Incertae sedis(100);g | Trichaptum(100);s                       | Trichaptum sp(100);               |
| Otu01001 | k                                                                                                                         | Fungi(91);p  | Basidiomycota(91);c       | unclassified Basidiomycota(91);o       | unclassified Basidiomycota(91);f            | unclassified Basidiomycota(91);g             | unclassified Basidiomycota(91);s        | Basidiomycota sp(91);             |
| Otu01002 | unknown(100);unclassified(100);unclassified(100);unclassified(100);unclassified(100);unclassified(100);                   |              |                           |                                        |                                             |                                              |                                         |                                   |
| Otu01003 | k                                                                                                                         | Fungi(100);p | Basidiomycota(100);c      | Agaricomycetes(100);o                  | Agaricales(100);f                           | Strophariaceae(100);g                        | Hypholoma(100);s                        | Hypholoma capnoides(100);         |
| Otu01004 | k                                                                                                                         | Fungi(100);p | Basidiomycota(100);c      | Agaricomycetes(100);o                  | Agaricales(100);f                           | Strophariaceae(91);g                         | Pholiota(91);s                          | Pholiota conissans(91);           |
| Otu01005 | k                                                                                                                         | Fungi(100);p | Ascomycota(100);c         | Leotiomycetes(100);o                   | Helotiales(100);f                           | unclassified Helotiales(100);g               | unclassified Helotiales(100);s          | Helotiales sp(100);               |
| Otu01006 | k                                                                                                                         | Fungi(100);p | Ascomycota(100);c         | Saccharomycetes(100);o                 | Saccharomycetales(100);f                    | unclassified Saccharomycetales(100);g        | unclassified Saccharomycetales(100);s   | Saccharomycetales sp(100);        |
| Otu01007 | k                                                                                                                         | Fungi(100);p | Ascomycota(100);c         | Sordariomycetes(100);o                 | unclassified Sordariomycetes(100);f         | unclassified Sordariomycetes(100);g          | unclassified Sordariomycetes(100);s     | Sordariomycetes sp(100);          |
| Otu01008 | k                                                                                                                         | Fungi(100);p | Zygomycota(100);c         | Zygomycota class Incertae sedis(100);o | Mortierellales(100);f                       | Mortierellaceae(100);g                       | Mortierella(100);s                      | Mortierella cystojenkinii(100);   |
| Otu01009 | k                                                                                                                         | Fungi(100);p | Ascomycota(100);c         | Eurotiomycetes(100);o                  | Chaetothyriales(100);f                      | Herpotrichiellaceae(100);g                   | unclassified Herpotrichiellaceae(100);s | Herpotrichiellaceae sp(100);      |
| Otu01010 | k                                                                                                                         | Fungi(100);p | Ascomycota(100);c         | Dothideomycetes(100);o                 | Dothideomycetes order Incertae sedis(100);f | Dothideomycetes family Incertae sedis(100);g | Scleroconidioma(100);s                  | Scleroconidioma sphagnicola(100); |
| Otu01011 | k                                                                                                                         | Fungi(100);p | Ascomycota(100);c         | Eurotiomycetes(100);o                  | Chaetothyriales(100);f                      | Herpotrichiellaceae(100);g                   | Cladophialophora(100);s                 | Cladophialophora sp(100);         |
| Otu01012 | k                                                                                                                         | Fungi(82);p  | Ascomycota(82);c          | Sordariomycetes(82);o                  | Ophiostomatales(82);f                       | Ophiostomataceae(82);g                       | Ophiostoma(82);s                        | Ophiostoma denticiliatum(82);     |
| Otu01013 | k                                                                                                                         | Fungi(100);p | Basidiomycota(100);c      | Agaricomycetes(100);o                  | Agaricales(100);f                           | Cortinariaceae(100);g                        | Cortinarius(100);s                      | Cortinarius sp(100);              |
| Otu01014 | k                                                                                                                         | Fungi(100);p | Ascomycota(100);c         | Eurotiomycetes(100);o                  | Eurotiales(100);f                           | Trichocomaceae(100);g                        | Talaromyces(100);s                      | Talaromyces proteolyticus(100);   |
| Otu01015 | unknown(100);unclassified(100);unclassified(100);unclassified(100);unclassified(100);unclassified(100);                   |              |                           |                                        |                                             |                                              |                                         |                                   |
| Otu01016 | k                                                                                                                         | Fungi(100);p | Ascomycota(100);c         | Sordariomycetes(100);o                 | Diaporthales(100);f                         | Diaporthaceae(100);g                         | Diaporthe(91);s                         | Diaporthe arengae(91);            |
| Otu01017 | k                                                                                                                         | Fungi(100);p | unclassified Fungi(100);c | unclassified Fungi(100);o              | unclassified Fungi(100);f                   | unclassified Fungi(100);g                    | unclassified Fungi(100);s               | Fungi sp(100);                    |
| Otu01018 | k                                                                                                                         | Fungi(100);p | Basidiomycota(100);c      | Agaricomycetes(100);o                  | Auriculariales(100);f                       | unclassified Auriculariales(100);g           | unclassified Auriculariales(100);s      | Auriculariales sp(100);           |
| Otu01019 | k                                                                                                                         | Fungi(100);p | Basidiomycota(100);c      | Tremellomycetes(100);o                 | Tremellales(100);f                          | Tremellales family Incertae sedis(100);g     | Tremella(100);s                         | Tremella encephala(100);          |

Supplementary, TableS1A  
 Taxonomy of OTUs  
 Normalized data, identification according to blast UNITEvs7

|          |                                                                                                                                                                                                                |
|----------|----------------------------------------------------------------------------------------------------------------------------------------------------------------------------------------------------------------|
| Otu01020 | k Fungi(100);p Basidiomycota(100);c Agaricomycetes(100);o Agaricales(100);f Mycenaceae(100);g Mycena(100);s Mycena_sp(64);                                                                                     |
| Otu01021 | unknown(100);unclassified(100);unclassified(100);unclassified(100);unclassified(100);unclassified(100);unclassified(100);                                                                                      |
| Otu01022 | unknown(100);unclassified(100);unclassified(100);unclassified(100);unclassified(100);unclassified(100);unclassified(100);unclassified(100);                                                                    |
| Otu01023 | k Fungi(100);p Basidiomycota(100);c Agaricomycetes(100);o Atheliales(100);f Atheliaceae(100);g Athelia(82);s Athelia_sp(82);                                                                                   |
| Otu01024 | k Fungi(100);p Basidiomycota(100);c Microbotryomycetes(91);o Sporidiobolales(91);f Sporidiobolales_family_Incertae_sedis(91);g Rhodotorula(91);s Rhodotorula_ingeniosa(82);                                    |
| Otu01025 | k Fungi(100);p Ascomycota(100);c Eurotiomycetes(100);o Chaetothyriales(100);f Herpotrichiellaceae(100);g Cladophialophora(100);s Cladophialophora_sp(100);                                                     |
| Otu01026 | k Fungi(100);p Basidiomycota(100);c Agaricomycetes(100);o Agaricales(100);f Hygrophoraceae(100);g Hygrophorus(100);s Hygrophorus_piceae(100);                                                                  |
| Otu01027 | k Fungi(100);p Ascomycota(100);c Leotiomyces(100);o Leotiomyces_order_Incertae_sedis(100);f Leotiomyces_family_Incertae_sedis(100);g Geomyces(100);s Geomyces_auratus(100);                                    |
| Otu01028 | k Fungi(91);p Ascomycota(91);c Sordariomycetes(91);o unclassified_Sordariomycetes(91);f unclassified_Sordariomycetes(91);g unclassified_Sordariomycetes(91);s Sordariomycetes_sp(91);                          |
| Otu01029 | k Fungi(100);p Ascomycota(100);c Leotiomyces(100);o Leotiomyces_order_Incertae_sedis(100);f Leotiomyces_family_Incertae_sedis(100);g Meliniomyces(100);s Meliniomyces_bicolor(100);                            |
| Otu01030 | unknown(100);unclassified(100);unclassified(100);unclassified(100);unclassified(100);unclassified(100);unclassified(100);                                                                                      |
| Otu01031 | k Fungi(100);p Basidiomycota(100);c Agaricomycetes(100);o Cantharellales(91);f Botrybasidiaceae(91);g unclassified_Botrybasidiaceae(91);s Botrybasidiaceae_sp(91);                                             |
| Otu01033 | k Fungi(100);p Zygomycota(100);c Zygomycota_class_Incertae_sedis(100);o Mortierellales(100);f Mortierellaceae(100);g Mortierella(100);s Mortierella_horticola(100);                                            |
| Otu01034 | k Fungi(82);p Glomeromycota(82);c Glomeromycetes(82);o Glomerales(82);f Glomeraceae(82);g Funneliformis(82);s Funneliformis_caledonium(82);                                                                    |
| Otu01035 | k Fungi(100);p Ascomycota(100);c Leotiomyces(91);o Helotiales(91);f unclassified_Helotiales(91);g unclassified_Helotiales(91);s Helotiales_sp(91);                                                             |
| Otu01036 | k Fungi(100);p Basidiomycota(100);c Agaricomycetes(100);o Agaricales(100);f Pluteaceae(100);g Pluteus(100);s Pluteus_granulatus(100);                                                                          |
| Otu01037 | k Fungi(100);p Ascomycota(100);c Leotiomyces(100);o Helotiales(100);f unclassified_Helotiales(100);g unclassified_Helotiales(100);s Helotiales_sp(100);                                                        |
| Otu01038 | k Fungi(70);unclassified(100);unclassified(100);unclassified(100);unclassified(100);unclassified(100);unclassified(100);                                                                                       |
| Otu01039 | unknown(70);unclassified(70);unclassified(70);unclassified(70);unclassified(70);unclassified(70);unclassified(70);                                                                                             |
| Otu01040 | k Fungi(70);p Basidiomycota(70);c Agaricomycetes(70);o Agaricales(70);f Marasmiaceae(70);g Clitocybula(70);s Clitocybula_lignicola(70);                                                                        |
| Otu01041 | k Fungi(100);p Chytridiomycota(100);c unclassified_Chytridiomycota(100);o unclassified_Chytridiomycota(100);f unclassified_Chytridiomycota(100);g unclassified_Chytridiomycota(100);s Chytridiomycota_sp(100); |
| Otu01042 | unknown(100);unclassified(100);unclassified(100);unclassified(100);unclassified(100);unclassified(100);unclassified(100);                                                                                      |
| Otu01043 | k Fungi(100);p Basidiomycota(100);c Agaricomycetes(100);o Telephorales(100);f Telephoraceae(100);g unclassified_Telephoraceae(100);s Telephoraceae_sp(100);                                                    |
| Otu01044 | k Fungi(90);p Basidiomycota(90);c Tremellomycetes(61);o Trichosporonales(61);f Trichosporonaceae(61);g Trichosporon(61);s Trichosporon_middelhovenii(61);                                                      |
| Otu01045 | k Fungi(100);p Ascomycota(100);c Eurotiomycetes(100);o Chaetothyriales(100);f Herpotrichiellaceae(100);g Cladophialophora(100);s Cladophialophora_sp(100);                                                     |
| Otu01046 | k Fungi(100);p Basidiomycota(100);c Agaricomycetes(100);o Trechisporales(100);f Hydnodontaceae(90);g Trechispora(90);s Trechispora_sp(90);                                                                     |
| Otu01047 | k Fungi(100);p unclassified_Fungi(100);c unclassified_Fungi(100);o unclassified_Fungi(100);f unclassified_Fungi(100);g unclassified_Fungi(100);s Fungi_sp(100);                                                |
| Otu01048 | k Fungi(80);p Glomeromycota(80);c Glomeromycetes(80);o Glomerales(80);f Glomeraceae(80);g unclassified_Glomeraceae(80);s Glomeraceae_sp(80);                                                                   |
| Otu01049 | k Fungi(100);p Basidiomycota(100);c Agaricomycetes(100);o Agaricales(100);f Inocybaceae(100);g unclassified_Inocybaceae(100);s Inocybaceae_sp(100);                                                            |
| Otu01051 | k Fungi(100);p Basidiomycota(100);c Tremellomycetes(100);o unclassified_Tremellomycetes(100);f unclassified_Tremellomycetes(100);g unclassified_Tremellomycetes(100);s Tremellomycetes_sp(100);                |
| Otu01052 | k Fungi(90);p Ascomycota(90);c Saccharomycetes(90);o Saccharomycetales(90);f Dipodascaceae(90);g Basidioascus(90);s Basidioascus_magus(90);                                                                    |
| Otu01053 | k Fungi(100);p Ascomycota(100);c Leotiomyces(100);o Helotiales(100);f unclassified_Helotiales(100);g unclassified_Helotiales(100);s Helotiales_sp(100);                                                        |
| Otu01054 | k Fungi(100);p Ascomycota(100);c Leotiomyces(70);o Leotiomyces_order_Incertae_sedis(70);f Leotiomyces_family_Incertae_sedis(70);g Sarea(70);s Sarea_sp(70);                                                    |
| Otu01056 | k Fungi(100);p Zygomycota(100);c Zygomycota_class_Incertae_sedis(100);o Mortierellales(100);f Mortierellaceae(100);g Mortierella(100);s Mortierella_sp(100);                                                   |
| Otu01057 | k Fungi(90);p Basidiomycota(90);c Agaricomycetes(90);o Auriculariales(90);f unclassified_Auriculariales(90);g unclassified_Auriculariales(90);s Auriculariales_sp(90);                                         |
| Otu01058 | k Fungi(100);p Ascomycota(100);c Eurotiomycetes(100);o Chaetothyriales(100);f Herpotrichiellaceae(100);g Cladophialophora(100);s Cladophialophora_sp(100);                                                     |
| Otu01059 | k Fungi(100);p Basidiomycota(100);c Agaricomycetes(100);o Agaricales(100);f Mycenaceae(100);g unclassified_Mycenaceae(100);s Mycenaceae_sp(100);                                                               |
| Otu01060 | k Fungi(100);p Chytridiomycota(100);c Chytridiomycetes(100);o Chytridiales(100);f unclassified_Chytridiales(100);g unclassified_Chytridiales(100);s Chytridiales_sp(100);                                      |
| Otu01061 | k Fungi(100);p Ascomycota(100);c Sordariomycetes(100);o unclassified_Sordariomycetes(100);f unclassified_Sordariomycetes(100);g unclassified_Sordariomycetes(100);s Sordariomycetes_sp(100);                   |
| Otu01062 | k Fungi(100);p Ascomycota(100);c Leotiomyces(100);o Helotiales(100);f unclassified_Helotiales(100);g unclassified_Helotiales(100);s Helotiales_sp(100);                                                        |
| Otu01063 | k Fungi(100);p Basidiomycota(100);c Agaricomycetes(100);o Agaricales(100);f Marasmiaceae(100);g Gymnopus(100);s Gymnopus_aquosus(100);                                                                         |
| Otu01064 | k Fungi(100);p Ascomycota(100);c Leotiomyces(100);o Helotiales(100);f Helotiales_family_Incertae_sedis(100);g Cadophora(100);s Cadophora_sp(100);                                                              |
| Otu01065 | k Fungi(100);p Ascomycota(100);c Ascomycota_class_Incertae_sedis(100);o Ascomycota_order_Incertae_sedis(100);f Ascomycota_family_Incertae_sedis(100);g unclassified_Ascomycota(100);s Ascomycota_sp(100);      |
| Otu01066 | unknown(100);unclassified(100);unclassified(100);unclassified(100);unclassified(100);unclassified(100);unclassified(100);                                                                                      |
| Otu01067 | k Fungi(100);p Basidiomycota(100);c Agaricomycetes(100);o Agaricales(100);f unclassified_Agaricales(100);g unclassified_Agaricales(100);s Agaricales_sp(100);                                                  |
| Otu01069 | k Fungi(100);p Rozellomycota(100);c unclassified_Rozellomycota(100);o unclassified_Rozellomycota(100);f unclassified_Rozellomycota(100);g unclassified_Rozellomycota(100);s Rozellomycota_sp(100);             |
| Otu01070 | k Fungi(100);p Basidiomycota(100);c Agaricomycetes(100);o Atheliales(100);f Atheliaceae(100);g Piloderma(100);s Piloderma_sphaerosporum(100);                                                                  |
| Otu01071 | k Fungi(100);p Basidiomycota(100);c Microbotryomycetes(100);o Sporidiobolales(100);f Sporidiobolales_family_Incertae_sedis(100);g Rhodotorula(100);s Rhodotorula_pilati(100);                                  |
| Otu01072 | unknown(100);unclassified(100);unclassified(100);unclassified(100);unclassified(100);unclassified(100);unclassified(100);                                                                                      |
| Otu01074 | k Fungi(100);p Basidiomycota(100);c Agaricomycetes(100);o Agaricales(100);f Cortinariaceae(100);g Cortinarius(100);s Cortinarius_flexipes(100);                                                                |
| Otu01075 | k Fungi(100);p Basidiomycota(100);c Agaricomycetes(100);o Boletales(100);f Coniophoraceae(100);g Coniophora(100);s Coniophora_olivacea(100);                                                                   |
| Otu01076 | k Fungi(100);p Zygomycota(100);c Zygomycota_class_Incertae_sedis(100);o Mucorales(100);f Umbelopsidaceae(100);g Umbelopsis(100);s Umbelopsis_sp(100);                                                          |
| Otu01077 | k Fungi(100);unclassified(100);unclassified(100);unclassified(100);unclassified(100);unclassified(100);unclassified(100);                                                                                      |
| Otu01078 | k Fungi(100);p Ascomycota(100);c Leotiomyces(100);o Helotiales(100);f Helotiaceae(100);g unclassified_Helotiaceae(100);s Helotiaceae_sp(100);                                                                  |
| Otu01079 | k Fungi(100);p Ascomycota(100);c Leotiomyces(100);o Helotiales(100);f Dermateaceae(100);g unclassified_Dermateaceae(100);s Dermateaceae_sp(100);                                                               |
| Otu01080 | k Fungi(100);p Basidiomycota(100);c Agaricomycetes(100);o Agaricales(100);f Mycenaceae(100);g Mycena(100);s Mycena_pearsoniana(100);                                                                           |
| Otu01081 | unknown(100);unclassified(100);unclassified(100);unclassified(100);unclassified(100);unclassified(100);unclassified(100);                                                                                      |
| Otu01082 | k Fungi(100);p Zygomycota(100);c Zygomycota_class_Incertae_sedis(100);o Mortierellales(100);f Mortierellaceae(100);g Mortierella(100);s Mortierella_bainieri(100);                                             |
| Otu01083 | k Fungi(100);p Ascomycota(100);c Sordariomycetes(100);o Xylariales(100);f Diatrypaceae(100);g Diatrype(100);s Valsa_sp_FlorWP(100);                                                                            |
| Otu01084 | k Fungi(100);p Basidiomycota(100);c Agaricomycetes(100);o Agaricales(100);f Mycenaceae(100);g Mycena(100);s Mycena_stipata(100);                                                                               |
| Otu01085 | k Fungi(100);p Basidiomycota(100);c Agaricomycetes(100);o Atheliales(100);f Atheliaceae(100);g Amphinema(100);s Amphinema_sp(100);                                                                             |
| Otu01086 | k Fungi(100);p Zygomycota(100);c Zygomycota_class_Incertae_sedis(100);o Mortierellales(100);f Mortierellaceae(100);g Mortierella(100);s Mortierella_sp(100);                                                   |
| Otu01087 | k Fungi(100);p Ascomycota(100);c Sordariomycetes(100);o Hypocreales(100);f Hypocreaceae(100);g Trichoderma(100);s Trichoderma_harzianum(100);                                                                  |
| Otu01088 | k Fungi(100);p Basidiomycota(100);c Agaricomycetes(100);o Agaricales(100);f Marasmiaceae(100);g Pleurocybella(100);s Pleurocybella_porrigenis(100);                                                            |
| Otu01089 | k Fungi(100);p Basidiomycota(100);c Agaricomycetes(100);o Sebaciales(100);f Sebaciales_Group_B(100);g unclassified_Sebaciales_Group_B(100);s Sebaciales_Group_B_sp(100);                                       |
| Otu01090 | unknown(78);unclassified(78);unclassified(78);unclassified(78);unclassified(78);unclassified(78);unclassified(78);                                                                                             |



Supplementary, TableS1A  
 Taxonomy of OTUs  
 Normalized data, identification according to blast UNITEv7

|          |                                                                                                         |              |                           |                                        |                                                |                                                 |                                        |                                                  |
|----------|---------------------------------------------------------------------------------------------------------|--------------|---------------------------|----------------------------------------|------------------------------------------------|-------------------------------------------------|----------------------------------------|--------------------------------------------------|
| Otu01092 | k                                                                                                       | Fungi(100);p | Basidiomycota(100);c      | Agaricomycetes(100);o                  | Cantharellales(100);f                          | unclassified Cantharellales(100);g              | unclassified Cantharellales(100);s     | Cantharellales_sp(100);                          |
| Otu01093 | k                                                                                                       | Fungi(100);p | Ascomycota(100);c         | Saccharomycetes(100);o                 | Saccharomycetales(100);f                       | unclassified Saccharomycetales(100);g           | unclassified Saccharomycetales(100);s  | Saccharomycetales_sp(100);                       |
| Otu01094 | k                                                                                                       | Fungi(100);p | Basidiomycota(100);c      | Tremellomycetes(100);o                 | Tremellales(100);f                             | Tremellales_family_Incertae_sedis(100);g        | Kockovaella(89);s                      | Kockovaella_machilophila(89);                    |
| Otu01095 | k                                                                                                       | Fungi(100);p | Ascomycota(100);c         | Eurotiomycetes(100);o                  | Eurotiales(100);f                              | Trichocomaceae(100);g                           | Aspergillus(100);s                     | Aspergillus_conicus(100);                        |
| Otu01096 | k                                                                                                       | Fungi(100);p | Ascomycota(100);c         | Dothideomycetes(100);o                 | Pleosporales(100);f                            | Pleosporales_family_Incertae_sedis(100);g       | Didymella(56);s                        | Didymella_sp(56);                                |
| Otu01097 | k                                                                                                       | Fungi(100);p | Ascomycota(100);c         | Leotiomycetes(100);o                   | Helotiales(100);f                              | Helotiales_family_Incertae_sedis(100);g         | Hyphodiscus(100);s                     | Hyphodiscus_hymeniophilus(100);                  |
| Otu01098 | k                                                                                                       | Fungi(100);p | Zygomycota(100);c         | Zygomycota_class_Incertae_sedis(100);o | Mucorales(100);f                               | Umbelopsidaceae(100);g                          | Umbelopsis(100);s                      | Umbelopsis_angularis(100);                       |
| Otu01099 | k                                                                                                       | Fungi(100);p | Basidiomycota(100);c      | Agaricomycetes(100);o                  | Agaricales(100);f                              | Tricholomataceae(100);g                         | Tricholomopsis(100);s                  | Tricholomopsis_decorata(100);                    |
| Otu01100 | k                                                                                                       | Fungi(100);p | Ascomycota(100);c         | Eurotiomycetes(100);o                  | Chaetothyriales(100);f                         | Herpotrichiellaceae(100);g                      | Capronia(100);s                        | Capronia_semi-immersa(100);                      |
| Otu01101 | k                                                                                                       | Fungi(100);p | Basidiomycota(100);c      | Tritirachiomycetes(100);o              | Tritirachiomycetes_order_Incertae_sedis(100);f | Tritirachiomycetes_family_Incertae_sedis(100);g | Paratritirachium(100);s                | Paratritirachium_sp(100);                        |
| Otu01102 | k                                                                                                       | Fungi(100);p | Ascomycota(100);c         | Leotiomycetes(100);o                   | Helotiales(100);f                              | unclassified Helotiales(100);g                  | unclassified Helotiales(100);s         | Helotiales_sp(100);                              |
| Otu01103 | k                                                                                                       | Fungi(100);p | Ascomycota(100);c         | Dothideomycetes(100);o                 | Capnodiales(100);f                             | Mycosphaerellaceae(100);g                       | unclassified Mycosphaerellaceae(100);s | Mycosphaerellaceae_sp(100);                      |
| Otu01104 | k                                                                                                       | Fungi(100);p | Basidiomycota(100);c      | Agaricomycetes(100);o                  | Sebacinales(100);f                             | Sebacinaceae(100);g                             | unclassified Sebacinaceae(100);s       | Sebacinaceae_sp(100);                            |
| Otu01105 | k                                                                                                       | Fungi(100);p | Chytridiomycota(100);c    | unclassified Chytridiomycota(100);o    | unclassified Chytridiomycota(100);f            | unclassified Chytridiomycota(100);g             | unclassified Chytridiomycota(100);s    | Chytridiomycota_sp(100);                         |
| Otu01108 | k                                                                                                       | Fungi(89);p  | Basidiomycota(89);c       | Microbotryomycetes(89);o               | Sporidiobolales(89);f                          | Sporidiobolales_family_Incertae_sedis(89);g     | Rhodotorula(89);s                      | Rhodotorula_pini(89);                            |
| Otu01109 | k                                                                                                       | Fungi(100);p | Basidiomycota(100);c      | Agaricomycetes(100);o                  | Sebacinales(100);f                             | Sebacinaceae(100);g                             | unclassified Sebacinaceae(100);s       | Sebacinaceae_sp(100);                            |
| Otu01110 | k                                                                                                       | Fungi(100);p | Ascomycota(100);c         | Leotiomycetes(100);o                   | Helotiales(100);f                              | Hyaloscyphaceae(100);g                          | Arachnopeziza(100);s                   | Arachnopeziza_sp(100);                           |
| Otu01111 | k                                                                                                       | Fungi(100);p | Ascomycota(100);c         | Saccharomycetes(100);o                 | Saccharomycetales(100);f                       | Lipomycetaceae(100);g                           | Lipomyces(100);s                       | Lipomyces_sp(100);                               |
| Otu01112 | k                                                                                                       | Fungi(100);p | Ascomycota(100);c         | Leotiomycetes(100);o                   | Rhizistmatales(100);f                          | Cudoniaceae(100);g                              | Cudonia(100);s                         | Cudonia_sp_Z_W_Ge_2243(100);                     |
| Otu01113 | k                                                                                                       | Fungi(100);p | Ascomycota(100);c         | Leotiomycetes(100);o                   | Helotiales(100);f                              | Dermateaceae(100);g                             | unclassified Dermateaceae(100);s       | Dermateaceae_sp(100);                            |
| Otu01114 | k                                                                                                       | Fungi(100);p | Zygomycota(100);c         | Zygomycota_class_Incertae_sedis(100);o | Mortierellales(100);f                          | Mortierellaceae(100);g                          | Mortierella(100);s                     | Mortierella_sp_WD32A(100);                       |
| Otu01115 | k                                                                                                       | Fungi(100);p | Ascomycota(100);c         | Leotiomycetes(100);o                   | Helotiales(100);f                              | Helotiaceae(100);g                              | Claussenomyces(100);s                  | Claussenomyces_sp(100);                          |
| Otu01116 | k                                                                                                       | Fungi(100);p | Basidiomycota(100);c      | Tremellomycetes(100);o                 | Trichosporonales(100);f                        | Trichosporonaceae(100);g                        | Trichosporon(100);s                    | Trichosporon_dehoogii(100);                      |
| Otu01117 | k                                                                                                       | Fungi(100);p | Ascomycota(100);c         | Sordariomycetes(100);o                 | Hypocreales(100);f                             | unclassified Hypocreales(100);g                 | unclassified Hypocreales(100);s        | Hypocreales_sp(100);                             |
| Otu01119 | k                                                                                                       | Fungi(100);p | Zygomycota(100);c         | Zygomycota_class_Incertae_sedis(100);o | Mortierellales(100);f                          | Mortierellaceae(100);g                          | Mortierella(100);s                     | Mortierella_sp_GW3_10(100);                      |
| Otu01120 | k                                                                                                       | Fungi(89);p  | Ascomycota(89);c          | Lecanormycetes(78);o                   | Teloschistales(78);f                           | Teloschistaceae(78);g                           | Caloplaca(78);s                        | Caloplaca_sp_CBFS_JV9673(78);                    |
| Otu01122 | k                                                                                                       | Fungi(100);p | Basidiomycota(100);c      | Agaricomycetes(100);o                  | Agaricales(100);f                              | Cortinariaceae(100);g                           | Cortinarius(100);s                     | Cortinarius_aff_vibratilis_UBC_F17125_OC53(100); |
| Otu01123 | k                                                                                                       | Fungi(100);p | Basidiomycota(100);c      | Agaricomycetes(100);o                  | Polyporales(100);f                             | Polyporales_family_Incertae_sedis(100);g        | Phlebiella(100);s                      | Phlebiella_sp(100);                              |
| Otu01124 | k                                                                                                       | Fungi(67);p  | Rozellomycota(67);c       | unclassified Rozellomycota(67);o       | unclassified Rozellomycota(67);f               | unclassified Rozellomycota(67);g                | unclassified Rozellomycota(67);s       | Rozellomycota_sp(67);                            |
| Otu01125 | k                                                                                                       | Fungi(100);p | Zygomycota(100);c         | Zygomycota_class_Incertae_sedis(100);o | Mortierellales(100);f                          | Mortierellaceae(100);g                          | Mortierella(100);s                     | Mortierella_sp(100);                             |
| Otu01126 | k                                                                                                       | Fungi(100);p | Basidiomycota(100);c      | Agaricomycetes(100);o                  | Cantharellales(100);f                          | Cantharellaceae(100);g                          | Craterellus(100);s                     | Craterellus_tubaeformis(100);                    |
| Otu01127 | k                                                                                                       | Fungi(100);p | Ascomycota(100);c         | Saccharomycetes(100);o                 | Saccharomycetales(100);f                       | Saccharomycetales_family_Incertae_sedis(100);g  | Candida(100);s                         | Candida_fermenticariens(100);                    |
| Otu01128 | k                                                                                                       | Fungi(100);p | Ascomycota(100);c         | Peizizomycetes(100);o                  | Pezizales(100);f                               | Pyrenomataceae(100);g                           | Cheilymenia(100);s                     | Cheilymenia_sp(100);                             |
| Otu01129 | unknown(100);unclassified(100);unclassified(100);unclassified(100);unclassified(100);unclassified(100); |              |                           |                                        |                                                |                                                 |                                        |                                                  |
| Otu01130 | k                                                                                                       | Fungi(100);p | Basidiomycota(100);c      | Agaricomycetes(100);o                  | Polyporales(100);f                             | Xenasmataceae(100);g                            | Xenasmataella(100);s                   | Xenasmataella_sp(100);                           |
| Otu01131 | k                                                                                                       | Fungi(100);p | Zygomycota(100);c         | Zygomycota_class_Incertae_sedis(100);o | Mortierellales(100);f                          | Mortierellaceae(100);g                          | Mortierella(100);s                     | Mortierella_sp(100);                             |
| Otu01132 | k                                                                                                       | Fungi(100);p | Basidiomycota(100);c      | Microbotryomycetes(100);o              | Sporidiobolales(100);f                         | unclassified Sporidiobolales(100);g             | unclassified Sporidiobolales(100);s    | Sporidiobolales_sp(100);                         |
| Otu01133 | k                                                                                                       | Fungi(100);p | Basidiomycota(100);c      | Microbotryomycetes(100);o              | Sporidiobolales(100);f                         | Sporidiobolales_family_Incertae_sedis(100);g    | unclassified Sporidiobolales(100);s    | Sporidiobolales_sp(100);                         |
| Otu01134 | k                                                                                                       | Fungi(100);p | unclassified Fungi(100);c | unclassified Fungi(100);o              | unclassified Fungi(100);f                      | unclassified Fungi(100);g                       | unclassified Fungi(100);s              | Fungi_sp(100);                                   |
| Otu01135 | k                                                                                                       | Fungi(89);p  | Ascomycota(89);c          | Saccharomycetes(89);o                  | Saccharomycetales(89);f                        | Dipodasaceae(89);g                              | Basidioascus(89);s                     | Basidioascus_magus(89);                          |
| Otu01136 | unknown(100);unclassified(100);unclassified(100);unclassified(100);unclassified(100);unclassified(100); |              |                           |                                        |                                                |                                                 |                                        |                                                  |
| Otu01137 | k                                                                                                       | Fungi(100);p | Ascomycota(100);c         | Dothideomycetes(100);o                 | Venturiales(100);f                             | unclassified Venturiales(100);g                 | unclassified Venturiales(100);s        | Venturiales_sp(100);                             |
| Otu01138 | k                                                                                                       | Fungi(100);p | Basidiomycota(100);c      | Microbotryomycetes(100);o              | Sporidiobolales(100);f                         | Sporidiobolales_family_Incertae_sedis(100);g    | Rhodotorula(100);s                     | Rhodotorula_pilatii(100);                        |
| Otu01139 | k                                                                                                       | Fungi(100);p | Basidiomycota(100);c      | Agaricomycetes(100);o                  | Thelephorales(100);f                           | Bankeraceae(78);g                               | Hydnellum(78);s                        | Hydnellum_scleropodium(78);                      |
| Otu01140 | k                                                                                                       | Fungi(88);p  | Rozellomycota(88);c       | unclassified Rozellomycota(88);o       | unclassified Rozellomycota(88);f               | unclassified Rozellomycota(88);g                | unclassified Rozellomycota(88);s       | Rozellomycota_sp(88);                            |
| Otu01141 | k                                                                                                       | Fungi(100);p | Basidiomycota(100);c      | Agaricomycetes(100);o                  | Russulales(100);f                              | Albatrellaceae(100);g                           | unclassified Albatrellaceae(100);s     | Albatrellaceae_sp(100);                          |
| Otu01142 | k                                                                                                       | Fungi(100);p | Ascomycota(100);c         | Leotiomycetes(100);o                   | Leotiomycetes_order_Incertae_sedis(100);f      | Leotiomycetes_family_Incertae_sedis(100);g      | Sarea(100);s                           | Sarea_resinae(100);                              |
| Otu01143 | k                                                                                                       | Fungi(75);p  | Ascomycota(75);c          | Eurotiomycetes(75);o                   | Eurotiales(75);f                               | Trichocomaceae(75);g                            | Aspergillus(75);s                      | Aspergillus_lanosus(75);                         |
| Otu01144 | k                                                                                                       | Fungi(100);p | Ascomycota(100);c         | Eurotiomycetes(100);o                  | Chaetothyriales(100);f                         | Herpotrichiellaceae(100);g                      | Cladophialophora(100);s                | Cladophialophora_sp(100);                        |
| Otu01145 | unknown(63);unclassified(63);unclassified(63);unclassified(63);unclassified(63);unclassified(63);       |              |                           |                                        |                                                |                                                 |                                        |                                                  |
| Otu01146 | k                                                                                                       | Fungi(100);p | Ascomycota(100);c         | Leotiomycetes(100);o                   | Helotiales(100);f                              | Helotiaceae(100);g                              | unclassified Helotiaceae(100);s        | Helotiaceae_sp(100);                             |
| Otu01147 | k                                                                                                       | Fungi(100);p | Ascomycota(100);c         | Eurotiomycetes(100);o                  | Chaetothyriales(100);f                         | Herpotrichiellaceae(100);g                      | Cladophialophora(100);s                | Cladophialophora_chaetospora(100);               |
| Otu01148 | k                                                                                                       | Fungi(100);p | Basidiomycota(100);c      | Agaricomycetes(100);o                  | Thelephorales(100);f                           | Thelephoraceae(100);g                           | unclassified Thelephoraceae(100);s     | Thelephoraceae_sp(100);                          |
| Otu01149 | k                                                                                                       | Fungi(100);p | Basidiomycota(100);c      | Agaricomycetes(100);o                  | Cantharellales(100);f                          | Ceratobasidiaceae(100);g                        | unclassified Ceratobasidiaceae(100);s  | Ceratobasidiaceae_sp(100);                       |
| Otu01150 | k                                                                                                       | Fungi(100);p | Ascomycota(100);c         | Leotiomycetes(63);o                    | unclassified Leotiomycetes(63);f               | unclassified Leotiomycetes(63);g                | unclassified Leotiomycetes(63);s       | Leotiomycetes_sp(63);                            |
| Otu01151 | k                                                                                                       | Fungi(100);p | Ascomycota(100);c         | Sordariomycetes(100);o                 | Ophiostomatales(100);f                         | Ophiostomataceae(100);g                         | Sporothrix(100);s                      | Sporothrix_sp_1_RJ_2012(100);                    |
| Otu01152 | k                                                                                                       | Fungi(88);p  | Ascomycota(88);c          | Peizizomycetes(88);o                   | Pezizales(88);f                                | Pezizaceae(88);g                                | Kalaharituber(88);s                    | Kalaharituber_pfellii(88);                       |
| Otu01153 | k                                                                                                       | Fungi(100);p | Ascomycota(100);c         | Dothideomycetes(100);o                 | Hysteriales(100);f                             | Gloniaceae(100);g                               | Cenococcum(100);s                      | Cenococcum_sp(100);                              |
| Otu01156 | unknown(100);unclassified(100);unclassified(100);unclassified(100);unclassified(100);unclassified(100); |              |                           |                                        |                                                |                                                 |                                        |                                                  |
| Otu01157 | k                                                                                                       | Fungi(100);p | Ascomycota(100);c         | Leotiomycetes(100);o                   | Helotiales(100);f                              | Vibrissaceae(100);g                             | Phialocephala(100);s                   | Phialocephala_fusca(100);                        |
| Otu01158 | k                                                                                                       | Fungi(100);p | Ascomycota(100);c         | Leotiomycetes(100);o                   | Helotiales(100);f                              | Helotiaceae(100);g                              | Rhizoscyphus(100);s                    | Rhizoscyphus_ericae(100);                        |
| Otu01159 | k                                                                                                       | Fungi(75);p  | Ascomycota(75);c          | Saccharomycetes(75);o                  | Saccharomycetales(75);f                        | Dipodasaceae(75);g                              | Basidioascus(75);s                     | Basidioascus_magus(75);                          |
| Otu01160 | unknown(100);unclassified(100);unclassified(100);unclassified(100);unclassified(100);unclassified(100); |              |                           |                                        |                                                |                                                 |                                        |                                                  |
| Otu01161 | k                                                                                                       | Fungi(100);p | Basidiomycota(100);c      | Agaricomycetes(100);o                  | Boletales(100);f                               | Boletaceae(100);g                               | Leccinum(100);s                        | Leccinum_vulpinum(63);                           |
| Otu01162 | k                                                                                                       | Fungi(100);p | Ascomycota(100);c         | Sordariomycetes(100);o                 | unclassified Sordariomycetes(100);f            | unclassified Sordariomycetes(100);g             | unclassified Sordariomycetes(100);s    | Sordariomycetes_sp(100);                         |
| Otu01163 | k                                                                                                       | Fungi(100);p | Ascomycota(100);c         | Leotiomycetes(100);o                   | Leotiomycetes_order_Incertae_sedis(100);f      | Leotiomycetes_family_Incertae_sedis(100);g      | Meliomyces(100);s                      | Meliomyces_sp(100);                              |

Supplementary, TableS1A  
 Taxonomy of OTUs  
 Normalized data, identification according to blast UNITEv57

|          |                                                                                                                           |                                                                                                                                                                                                      |
|----------|---------------------------------------------------------------------------------------------------------------------------|------------------------------------------------------------------------------------------------------------------------------------------------------------------------------------------------------|
| Otu01164 | k                                                                                                                         | Fungi(100);p_Basidiomycota(100);c_Agaricomycetes(100);o_Agaricales(100);f_Cortinariaceae(100);g_Cortinarius(100);s_Cortinarius_sp(100);                                                              |
| Otu01165 | k                                                                                                                         | Fungi(100);p_Ascomycota(100);c_unclassified_Ascomycota(100);o_unclassified_Ascomycota(100);f_unclassified_Ascomycota(100);g_unclassified_Ascomycota(100);s_Ascomycota_sp(100);                       |
| Otu01166 | k                                                                                                                         | Fungi(100);p_Basidiomycota(100);c_Microbotryomycetes(100);o_Sporidiobolales(100);f_Sporidiobolales_family_Incertae_sedis(100);g_Rhodotorula(100);s_Rhodotorula_yarrowii(88);                         |
| Otu01167 | k                                                                                                                         | Fungi(88);p_Ascomycota(88);c_Orbiliomycetes(88);o_unclassified_Orbiliomycetes(88);f_unclassified_Orbiliomycetes(88);g_unclassified_Orbiliomycetes(88);s_Orbiliomycetes_sp(88);                       |
| Otu01168 | k                                                                                                                         | Fungi(100);p_Ascomycota(100);c_Dothideomycetes(100);o_unclassified_Dothideomycetes(100);f_unclassified_Dothideomycetes(100);g_unclassified_Dothideomycetes(100);s_Dothideomycetes_sp(100);           |
| Otu01169 | k                                                                                                                         | Fungi(100);p_Ascomycota(100);c_Leotiomycetes(100);o_Helotiales(100);f_unclassified_Helotiales(100);g_unclassified_Helotiales(100);s_Helotiales_sp(100);                                              |
| Otu01170 | unknown(88);unclassified(88);unclassified(88);unclassified(88);unclassified(88);unclassified(88);unclassified(88);        |                                                                                                                                                                                                      |
| Otu01171 | unknown(100);unclassified(100);unclassified(100);unclassified(100);unclassified(100);unclassified(100);unclassified(100); |                                                                                                                                                                                                      |
| Otu01172 | unknown(100);unclassified(100);unclassified(100);unclassified(100);unclassified(100);unclassified(100);unclassified(100); |                                                                                                                                                                                                      |
| Otu01173 | k                                                                                                                         | Fungi(100);p_Ascomycota(100);c_Dothideomycetes(100);o_Dothideomycetes_order_Incertae_sedis(100);f_Pseudeurotiaceae(100);g_unclassified_Pseudeurotiaceae(100);s_Pseudeurotiaceae_sp(100);             |
| Otu01175 | unknown(100);unclassified(100);unclassified(100);unclassified(100);unclassified(100);unclassified(100);unclassified(100); |                                                                                                                                                                                                      |
| Otu01176 | unknown(100);unclassified(100);unclassified(100);unclassified(100);unclassified(100);unclassified(100);unclassified(100); |                                                                                                                                                                                                      |
| Otu01177 | k                                                                                                                         | Fungi(100);p_Zygomycota(100);c_Zygomycota_class_Incertae_sedis(100);o_Mortierellales(100);f_Mortierellaceae(100);g_Mortierella(100);s_Mortierella_beljakovae(100);                                   |
| Otu01178 | k                                                                                                                         | Fungi(100);p_Ascomycota(100);c_Sordariomycetes(100);o_Hypocreales(100);f_Nectriaceae(100);g_Pleonectria(88);s_Pleonectria_strobi(88);                                                                |
| Otu01179 | k                                                                                                                         | Fungi(100);p_Ascomycota(100);c_Leotiomycetes(100);o_unclassified_Leotiomycetes(100);f_unclassified_Leotiomycetes(100);g_unclassified_Leotiomycetes(100);s_Leotiomycetes_sp(100);                     |
| Otu01180 | k                                                                                                                         | Fungi(100);p_Ascomycota(100);c_Dothideomycetes(100);o_Pleosporales(100);f_Pleosporales_family_Incertae_sedis(100);g_Mycocentrospora(100);s_Mycocentrospora_sp(100);                                  |
| Otu01181 | k                                                                                                                         | Fungi(100);p_Glomeromycota(100);c_Glomeromycetes(100);o_Glomerales(100);f_Glomeraceae(100);g_unclassified_Glomeraceae(100);s_Glomeraceae_sp(100);                                                    |
| Otu01182 | k                                                                                                                         | Fungi(100);p_Zygomycota(100);c_Zygomycota_class_Incertae_sedis(100);o_Mortierellales(100);f_Mortierellaceae(100);g_Mortierella(100);s_Mortierella_minutissima(88);                                   |
| Otu01183 | k                                                                                                                         | Fungi(100);p_unclassified_Fungi(100);c_unclassified_Fungi(100);o_unclassified_Fungi(100);f_unclassified_Fungi(100);g_unclassified_Fungi(100);s_Fungi_sp(100);                                        |
| Otu01184 | k                                                                                                                         | Fungi(100);p_Basidiomycota(100);c_Agaricomycetes(100);o_Agaricales(100);f_Strophariaceae(100);g_Hebeloma(100);s_Hebeloma_vesterholtii(100);                                                          |
| Otu01185 | k                                                                                                                         | Fungi(100);p_Ascomycota(100);c_Pezizomycetes(100);o_Pezizales(100);f_Discinaceae(100);g_Hydnotrya(100);s_Hydnotrya_sp(100);                                                                          |
| Otu01186 | k                                                                                                                         | Fungi(100);p_Ascomycota(100);c_Pezizomycetes(100);o_Pezizales(100);f_Sarcosomataceae(100);g_Pseudoplectania(100);s_Pseudoplectania_nigrella(100);                                                    |
| Otu01187 | k                                                                                                                         | Fungi(100);p_Ascomycota(100);c_Dothideomycetes(100);o_Dothideomycetes_order_Incertae_sedis(100);f_Pseudeurotiaceae(100);g_unclassified_Pseudeurotiaceae(100);s_Pseudeurotiaceae_sp(100);             |
| Otu01188 | k                                                                                                                         | Fungi(100);p_Basidiomycota(100);c_Tremellomycetes(100);o_Tremellales(100);f_Tremellales_family_Incertae_sedis(100);g_Cryptococcus(100);s_Cryptococcus_aerius(100);                                   |
| Otu01189 | k                                                                                                                         | Fungi(100);p_Ascomycota(100);c_Lecanoromycetes(100);o_unclassified_Lecanoromycetes(100);f_unclassified_Lecanoromycetes(100);g_unclassified_Lecanoromycetes(100);s_Lecanoromycetes_sp(100);           |
| Otu01190 | k                                                                                                                         | Fungi(100);p_Ascomycota(100);c_Eurotiomycetes(100);o_Chaetothyriales(100);f_Herpotrichiellaceae(100);g_unclassified_Herpotrichiellaceae(100);s_Herpotrichiellaceae_sp(100);                          |
| Otu01191 | k                                                                                                                         | Fungi(100);p_Basidiomycota(100);c_Agaricomycetes(100);o_Sebacinales(100);f_Sebacinales_Group_B(100);g_unclassified_Sebacinales_Group_B(100);s_Sebacinales_Group_B_sp(100);                           |
| Otu01192 | k                                                                                                                         | Fungi(100);p_Ascomycota(100);c_Leotiomycetes(100);o_Rhytismatales(100);f_Rhytismataceae(100);g_Lophodermium(100);s_Lophodermium_pinastri(100);                                                       |
| Otu01193 | k                                                                                                                         | Fungi(100);p_Basidiomycota(100);c_Agaricomycetes(100);o_Boletales(100);f_Boletales_family_Incertae_sedis(100);g_Jaapia(100);s_Jaapia_argillacea(100);                                                |
| Otu01194 | unknown(100);unclassified(100);unclassified(100);unclassified(100);unclassified(100);unclassified(100);unclassified(100); |                                                                                                                                                                                                      |
| Otu01195 | k                                                                                                                         | Fungi(100);p_Basidiomycota(100);c_Tritirachiomycetes(100);o_Tritirachiomycetes_order_Incertae_sedis(100);f_Tritirachiomycetes_family_Incertae_sedis(100);g_Paratrachium(100);s_Paratrachium_sp(100); |
| Otu01196 | k                                                                                                                         | Fungi(100);p_Ascomycota(100);c_Leotiomycetes(100);o_Helotiales(100);f_Hyaloscyphaceae(100);g_Cistella(100);s_Cistella_sp(100);                                                                       |
| Otu01197 | k                                                                                                                         | Fungi(100);p_Ascomycota(100);c_Leotiomycetes(100);o_Leotiomycetes_order_Incertae_sedis(88);f_Leotiomycetes_family_Incertae_sedis(88);g_Meliniomyces(88);s_Meliniomyces_bicolor(88);                  |
| Otu01198 | k                                                                                                                         | Fungi(100);p_Ascomycota(100);c_Leotiomycetes(100);o_Helotiales(100);f_Helotiaceae(100);g_Rhizoscyphus(100);s_Rhizoscyphus_sp(100);                                                                   |
| Otu01199 | k                                                                                                                         | Fungi(100);p_Basidiomycota(100);c_Agaricomycetes(100);o_Sebacinales(100);f_Sebacinales(88);g_unclassified_Sebacinales(88);s_Sebacinales_sp(88);                                                      |
| Otu01200 | k                                                                                                                         | Fungi(100);p_Ascomycota(100);c_Saccharomycetes(100);o_Saccharomycetales(100);f_Dipodascaceae(100);g_Basidioascus(100);s_Basidioascus_magus(100);                                                     |
| Otu01201 | k                                                                                                                         | Fungi(100);p_Rozellomycota(100);c_unclassified_Rozellomycota(100);o_unclassified_Rozellomycota(100);f_unclassified_Rozellomycota(100);g_unclassified_Rozellomycota(100);s_Rozellomycota_sp(100);     |
| Otu01202 | k                                                                                                                         | Fungi(100);p_Basidiomycota(100);c_Agaricomycetes(100);o_Auriculariales(100);f_Auriculariales_family_Incertae_sedis(100);g_Basidiodendron(100);s_Basidiodendron_caesiocinereum(100);                  |
| Otu01203 | k                                                                                                                         | Fungi(100);p_Ascomycota(100);c_Sordariomycetes(100);o_Hypocreales(100);f_Hypocreaceae(100);g_Trichoderma(100);s_Trichoderma_asperillum(100);                                                         |
| Otu01204 | unknown(100);unclassified(100);unclassified(100);unclassified(100);unclassified(100);unclassified(100);unclassified(100); |                                                                                                                                                                                                      |
| Otu01205 | k                                                                                                                         | Fungi(100);p_Basidiomycota(100);c_Agaricomycetes(100);o_Agaricales(100);f_Inocybaceae(100);g_Inocybe(100);s_Inocybe_napipes(100);                                                                    |
| Otu01206 | k                                                                                                                         | Fungi(86);p_Ascomycota(72);c_Saccharomycetes(72);o_Saccharomycetales(72);f_Dipodascaceae(72);g_Basidioascus(72);s_Basidioascus_magus(72);                                                            |
| Otu01207 | k                                                                                                                         | Fungi(100);p_Basidiomycota(100);c_Agaricomycetes(100);o_Agaricales(100);f_Mycenaceae(100);g_unclassified_Mycenaceae(86);s_Mycenaceae_sp(86);                                                         |
| Otu01209 | k                                                                                                                         | Fungi(100);p_Basidiomycota(100);c_Agaricomycetes(100);o_Atheliales(100);f_Atheliaceae(100);g_Piloderma(100);s_Piloderma_byssinum(100);                                                               |
| Otu01210 | k                                                                                                                         | Fungi(100);p_Basidiomycota(100);c_Agaricomycetes(100);o_Trechisporales(100);f_Hydnodontaceae(86);g_unclassified_Hydnodontaceae(86);s_Hydnodontaceae_sp(86);                                          |
| Otu01211 | k                                                                                                                         | Fungi(100);p_Ascomycota(86);c_Pezizomycetes(86);o_Pezizales(86);f_Pezizaceae(86);g_Pachyphloeus(86);s_Pachyphloeus_sp(86);                                                                           |
| Otu01212 | k                                                                                                                         | Fungi(100);p_Basidiomycota(100);c_Agaricomycetes(100);o_Gomphales(100);f_Gomphaceae(100);g_Ramaria(100);s_Ramaria_sp(100);                                                                           |
| Otu01213 | k                                                                                                                         | Fungi(100);p_Basidiomycota(100);c_Agaricomycetes(100);o_Cantharellales(100);f_Clavulinaceae(100);g_Clavulina(100);s_Clavulina_sp(100);                                                               |
| Otu01215 | k                                                                                                                         | Fungi(100);p_Ascomycota(100);c_Leotiomycetes(100);o_Helotiales(100);f_unclassified_Helotiales(100);g_unclassified_Helotiales(100);s_Helotiales_sp(100);                                              |
| Otu01216 | k                                                                                                                         | Fungi(100);p_Basidiomycota(100);c_Agaricomycetes(100);o_Agaricales(100);f_Cortinariaceae(100);g_Cortinarius(100);s_Cortinarius_integerrimus(86);                                                     |
| Otu01217 | k                                                                                                                         | Fungi(100);p_Basidiomycota(100);c_Agaricomycetes(100);o_Boletales(100);f_Hygrophoropsidaceae(100);g_Hygrophoropsis(100);s_Hygrophoropsis_aurantiaca(100);                                            |
| Otu01218 | unknown(100);unclassified(100);unclassified(100);unclassified(100);unclassified(100);unclassified(100);unclassified(100); |                                                                                                                                                                                                      |
| Otu01219 | k                                                                                                                         | Fungi(100);p_Basidiomycota(100);c_Agaricomycetes(100);o_Cantharellales(100);f_Botryobasidiaceae(100);g_unclassified_Botryobasidiaceae(100);s_Botryobasidiaceae_sp(100);                              |
| Otu01220 | k                                                                                                                         | Fungi(86);p_Glomeromycota(86);c_Glomeromycetes(86);o_Diversisporales(86);f_Diversisporaceae(86);g_Diversispora(86);s_Diversispora_celata(86);                                                        |
| Otu01221 | k                                                                                                                         | Fungi(86);p_Ascomycota(86);c_Dothideomycetes(86);o_Pleosporales(86);f_Pleosporaceae(86);g_Curvularia(86);s_Curvularia_sp_LH3(86);                                                                    |
| Otu01223 | unknown(100);unclassified(100);unclassified(100);unclassified(100);unclassified(100);unclassified(100);unclassified(100); |                                                                                                                                                                                                      |
| Otu01224 | k                                                                                                                         | Fungi(100);p_Ascomycota(100);c_Leotiomycetes(100);o_Helotiales(100);f_unclassified_Helotiales(100);g_unclassified_Helotiales(100);s_Helotiales_sp(100);                                              |
| Otu01225 | unknown(58);unclassified(58);unclassified(58);unclassified(58);unclassified(58);unclassified(58);unclassified(58);        |                                                                                                                                                                                                      |
| Otu01226 | unknown(86);unclassified(86);unclassified(86);unclassified(86);unclassified(86);unclassified(86);unclassified(86);        |                                                                                                                                                                                                      |
| Otu01227 | k                                                                                                                         | Fungi(100);p_Basidiomycota(100);c_Agaricomycetes(100);o_Boletales(100);f_Paxillaceae(100);g_Paxillus(100);s_Paxillus involutus(100);                                                                 |
| Otu01228 | k                                                                                                                         | Fungi(100);p_Basidiomycota(100);c_Agaricomycetes(100);o_Auriculariales(100);f_Auriculariales_family_Incertae_sedis(100);g_Basidiodendron(100);s_Basidiodendron_caesiocinereum(100);                  |
| Otu01229 | k                                                                                                                         | Fungi(100);p_Ascomycota(100);c_Leotiomycetes(100);o_Helotiales(100);f_unclassified_Helotiales(100);g_unclassified_Helotiales(100);s_Helotiales_sp(100);                                              |
| Otu01230 | unknown(100);unclassified(100);unclassified(100);unclassified(100);unclassified(100);unclassified(100);unclassified(100); |                                                                                                                                                                                                      |
| Otu01231 | k                                                                                                                         | Fungi(100);p_Rozellomycota(100);c_unclassified_Rozellomycota(100);o_unclassified_Rozellomycota(100);f_unclassified_Rozellomycota(100);g_unclassified_Rozellomycota(100);s_Rozellomycota_sp(100);     |
| Otu01232 | k                                                                                                                         | Fungi(72);p_Ascomycota(72);c_Pezizomycetes(72);o_Pezizales(72);f_Pyronemataceae(72);g_Geopora(72);s_Geopora_sp(72);                                                                                  |
| Otu01233 | k                                                                                                                         | Fungi(100);p_Basidiomycota(100);c_Agaricomycetes(100);o_Russulales(100);f_Russulaceae(100);g_Russula(100);s_Russula_rosealba(100);                                                                   |

Supplementary, TableS1A  
 Taxonomy of OTUs  
 Normalized data, identification according to blast UNITEv57

|          |                                                                                                                    |              |                           |                                                                                            |                                             |                                              |                                         |                                                   |
|----------|--------------------------------------------------------------------------------------------------------------------|--------------|---------------------------|--------------------------------------------------------------------------------------------|---------------------------------------------|----------------------------------------------|-----------------------------------------|---------------------------------------------------|
| Otu01234 | k                                                                                                                  | Fungi(100);p | Ascomycota(100);c         | Leotiomycetes(100);o                                                                       | unclassified Leotiomycetes(86);f            | unclassified Leotiomycetes(86);g             | unclassified Leotiomycetes(86);s        | Leotiomycetes sp(86);                             |
| Otu01235 | k                                                                                                                  | Fungi(100);p | Basidiomycota(100);c      | Agaricomycetes(100);o                                                                      | Boletales(100);f                            | Paxillaceae(100);g                           | Paxillus(100);s                         | Paxillus involutus(100);                          |
| Otu01236 | k                                                                                                                  | Fungi(86);p  | Rozellomycota(86);c       | unclassified Rozellomycota(86);o                                                           | unclassified Rozellomycota(86);f            | unclassified Rozellomycota(86);g             | unclassified Rozellomycota(86);s        | Rozellomycota sp(86);                             |
| Otu01237 | k                                                                                                                  | Fungi(100);p | Ascomycota(100);c         | Leotiomycetes(100);o                                                                       | Helotiales(100);f                           | unclassified Helotiales(100);g               | unclassified Helotiales(100);s          | Helotiales sp(100);                               |
| Otu01238 | k                                                                                                                  | Fungi(72);p  | unclassified Fungi(72);c  | unclassified Fungi(72);o                                                                   | unclassified Fungi(72);f                    | unclassified Fungi(72);g                     | unclassified Fungi(72);s                | Fungi sp(72);                                     |
| Otu01239 | k                                                                                                                  | Fungi(58);p  | Basidiomycota(58);c       | unclassified Basidiomycota(58);o                                                           | unclassified Basidiomycota(58);f            | unclassified Basidiomycota(58);g             | unclassified Basidiomycota(58);s        | Basidiomycota sp(58);                             |
| Otu01240 | k                                                                                                                  | Fungi(100);p | Zygomycota(100);c         | Zygomycota class Incertae sedis(100);o                                                     | Mucorales(100);f                            | Umbelopsidaceae(100);g                       | Umbelopsis(100);s                       | Umbelopsis sp(100);                               |
| Otu01243 | k                                                                                                                  | Fungi(100);p | Ascomycota(100);c         | Leotiomycetes(100);o                                                                       | Helotiales(100);f                           | unclassified Helotiales(100);g               | unclassified Helotiales(100);s          | Helotiales sp(100);                               |
| Otu01244 | k                                                                                                                  | Fungi(100);p | Ascomycota(100);c         | Dothideomycetes(100);o                                                                     | Venturiales(100);f                          | Venturiaceae(100);g                          | unclassified Venturiaceae(100);s        | Venturiaceae sp(100);                             |
| Otu01245 | k                                                                                                                  | Fungi(100);p | Ascomycota(100);c         | Leotiomycetes(100);o                                                                       | Helotiales(100);f                           | unclassified Helotiales(100);g               | unclassified Helotiales(100);s          | Helotiales sp(100);                               |
| Otu01246 | k                                                                                                                  | Fungi(100);p | Basidiomycota(100);c      | Agaricomycetes(100);o                                                                      | Polyporales(100);f                          | Meruliaceae(100);g                           | Hyphoderma(100);s                       | Hyphoderma subsetigerum(100);                     |
| Otu01247 | k                                                                                                                  | Fungi(100);p | Basidiomycota(100);c      | Microbotryomycetes(100);o                                                                  | Sporidiobolales(100);f                      | unclassified Sporidiobolales(100);g          | unclassified Sporidiobolales(100);s     | Sporidiobolales sp(100);                          |
| Otu01248 | k                                                                                                                  | Fungi(100);p | Ascomycota(100);c         | Dothideomycetes(100);o                                                                     | unclassified Dothideomycetes(72);f          | unclassified Dothideomycetes(72);g           | unclassified Dothideomycetes(72);s      | Dothideomycetes sp(72);                           |
| Otu01249 | k                                                                                                                  | Fungi(100);p | Basidiomycota(100);c      | Agaricomycetes(100);o                                                                      | Agaricales(100);f                           | Agaricaceae(100);g                           | Echinoderma(100);s                      | Echinoderma asperum(100);                         |
| Otu01250 | unknown(100);unclassified(100);unclassified(100);unclassified(100);unclassified(100);unclassified(100);            |              |                           |                                                                                            |                                             |                                              |                                         |                                                   |
| Otu01251 | k                                                                                                                  | Fungi(100);p | Ascomycota(100);c         | Dothideomycetes(100);o                                                                     | unclassified Dothideomycetes(100);f         | unclassified Dothideomycetes(100);g          | unclassified Dothideomycetes(100);s     | Dothideomycetes sp(100);                          |
| Otu01252 | k                                                                                                                  | Fungi(100);p | Ascomycota(100);c         | Leotiomycetes(100);o                                                                       | Helotiales(100);f                           | Hyaloscyphaceae(100);g                       | Cistella(100);s                         | Cistella sp(100);                                 |
| Otu01253 | unknown(100);unclassified(100);unclassified(100);unclassified(100);unclassified(100);unclassified(100);            |              |                           |                                                                                            |                                             |                                              |                                         |                                                   |
| Otu01254 | k                                                                                                                  | Fungi(100);p | unclassified Fungi(100);c | unclassified Fungi(100);o                                                                  | unclassified Fungi(100);f                   | unclassified Fungi(100);g                    | unclassified Fungi(100);s               | Fungi sp(100);                                    |
| Otu01255 | k                                                                                                                  | Fungi(100);p | Basidiomycota(100);c      | Agaricomycetes(100);o                                                                      | Agaricales(100);f                           | Hygrophoraceae(72);g                         | Hygrophorus(72);s                       | Hygrophorus korhonenii(72);                       |
| Otu01256 | k                                                                                                                  | Fungi(100);p | Ascomycota(100);c         | Eurotiomycetes(100);o                                                                      | Eurotiales(100);f                           | Elaphomycetaceae(100);g                      | unclassified Elaphomycetaceae(100);s    | Elaphomycetaceae sp(100);                         |
| Otu01257 | unknown(100);unclassified(100);unclassified(100);unclassified(100);unclassified(100);unclassified(100);            |              |                           |                                                                                            |                                             |                                              |                                         |                                                   |
| Otu01258 | k                                                                                                                  | Fungi(100);p | Ascomycota(100);c         | unclassified Ascomycota(100);o                                                             | unclassified Ascomycota(100);f              | unclassified Ascomycota(100);g               | unclassified Ascomycota(100);s          | Ascomycota sp(100);                               |
| Otu01259 | k                                                                                                                  | Fungi(100);p | Ascomycota(100);c         | Sordariomycetes(100);o                                                                     | Sordariomycetes order Incertae sedis(100);f | Plectosphaerellaceae(100);g                  | Verticillium(100);s                     | Verticillium sp(100);                             |
| Otu01260 | unknown(58);unclassified(58);unclassified(58);unclassified(58);unclassified(58);unclassified(58);                  |              |                           |                                                                                            |                                             |                                              |                                         |                                                   |
| Otu01262 | unknown(58);unclassified(58);unclassified(58);unclassified(58);unclassified(58);unclassified(58);unclassified(58); |              |                           |                                                                                            |                                             |                                              |                                         |                                                   |
| Otu01263 | k                                                                                                                  | Fungi(100);p | unclassified Fungi(100);c | unclassified Fungi(100);o                                                                  | unclassified Fungi(100);f                   | unclassified Fungi(100);g                    | unclassified Fungi(100);s               | Fungi sp(100);                                    |
| Otu01264 | k                                                                                                                  | Fungi(100);p | Basidiomycota(100);c      | Microbotryomycetes(100);o                                                                  | Sporidiobolales(100);f                      | Sporidiobolales family Incertae sedis(100);g | Rhodotorula(100);s                      | Rhodotorula buffonii(100);                        |
| Otu01265 | k                                                                                                                  | Fungi(100);p | Ascomycota(100);c         | Leotiomycetes(100);o                                                                       | Helotiales(100);f                           | unclassified Helotiales(100);g               | unclassified Helotiales(100);s          | Helotiales sp(100);                               |
| Otu01266 | k                                                                                                                  | Fungi(100);p | Ascomycota(100);c         | Sordariomycetes(100);o                                                                     | Chaetosphaeriales(100);f                    | Chaetosphaerellaceae(100);g                  | Chloridium(100);s                       | Chloridium sp(100);                               |
| Otu01267 | unknown(100);unclassified(100);unclassified(100);unclassified(100);unclassified(100);unclassified(100);            |              |                           |                                                                                            |                                             |                                              |                                         |                                                   |
| Otu01268 | k                                                                                                                  | Fungi(100);p | Basidiomycota(100);c      | Agaricomycetes(100);o                                                                      | Agaricales(100);f                           | Cortinariaceae(100);g                        | Cortinarius(100);s                      | Cortinarius diasemospermus var leptospermus(100); |
| Otu01269 | k                                                                                                                  | Fungi(100);p | Zygomycota(100);c         | unclassified Zygomycota(100);o                                                             | unclassified Zygomycota(100);f              | unclassified Zygomycota(100);g               | unclassified Zygomycota(100);s          | Zygomycota sp(100);                               |
| Otu01270 | k                                                                                                                  | Fungi(100);p | Zygomycota(100);c         | Zygomycota class Incertae sedis(100);o                                                     | Mortierellales(100);f                       | unclassified Mortierellales(100);g           | unclassified Mortierellales(100);s      | Mortierellales sp(100);                           |
| Otu01271 | k                                                                                                                  | Fungi(100);p | Basidiomycota(100);c      | Agaricomycetes(100);o                                                                      | Polyporales(100);f                          | Meruliaceae(100);g                           | Phebia(100);s                           | Phebia subochracea(100);                          |
| Otu01272 | k                                                                                                                  | Fungi(72);p  | Chytridiomycota(72);c     | Chytridiomycetes(72);o                                                                     | Rhizophydiales(72);f                        | Rhizophydiales family Incertae sedis(72);g   | Operculomyces(72);s                     | Operculomyces laminatus(72);                      |
| Otu01273 | unclassified(100);unclassified(100);unclassified(100);unclassified(100);unclassified(100);unclassified(100);       |              |                           |                                                                                            |                                             |                                              |                                         |                                                   |
| Otu01274 | k                                                                                                                  | Fungi(100);p | Rozellomycota(100);c      | unclassified Rozellomycota(100);o                                                          | unclassified Rozellomycota(100);f           | unclassified Rozellomycota(100);g            | unclassified Rozellomycota(100);s       | Rozellomycota sp(100);                            |
| Otu01275 | k                                                                                                                  | Fungi(100);p | Basidiomycota(100);c      | Microbotryomycetes(100);o                                                                  | unclassified Microbotryomycetes(100);f      | unclassified Microbotryomycetes(100);g       | unclassified Microbotryomycetes(100);s  | Microbotryomycetes sp(100);                       |
| Otu01276 | k                                                                                                                  | Fungi(100);p | Ascomycota(100);c         | Eurotiomycetes(100);o                                                                      | Chaetothyriales(100);f                      | Herpotrichiellaceae(100);g                   | unclassified Herpotrichiellaceae(100);s | Herpotrichiellaceae sp(100);                      |
| Otu01277 | k                                                                                                                  | Fungi(100);p | Basidiomycota(100);c      | Microbotryomycetes(100);o                                                                  | Kriegeriales(84);f                          | Kriegeriaceae(84);g                          | Meredithblackwellia(84);s               | Meredithblackwellia eburnea(84);                  |
| Otu01278 | k                                                                                                                  | Fungi(84);p  | unclassified Fungi(84);c  | unclassified Fungi(84);o                                                                   | unclassified Fungi(84);f                    | unclassified Fungi(84);g                     | unclassified Fungi(84);s                | Fungi sp(84);                                     |
| Otu01279 | k                                                                                                                  | Fungi(84);p  | Ascomycota(84);c          | Saccharomycetes(84);o                                                                      | Saccharomycetales(84);f                     | Dipodascaceae(84);g                          | Basidioascus(84);s                      | Basidioascus magus(84);                           |
| Otu01280 | k                                                                                                                  | Fungi(100);p | Ascomycota(100);c         | Eurotiomycetes(100);o                                                                      | Chaetothyriales(100);f                      | Herpotrichiellaceae(100);g                   | Fonsecaea(100);s                        | Fonsecaea erecta(100);                            |
| Otu01281 | k                                                                                                                  | Fungi(100);p | Basidiomycota(100);c      | Agaricomycetes(100);o                                                                      | Agaricales(100);f                           | Inocybaceae(100);g                           | Inocybe(100);s                          | Inocybe pseudoteratargus(100);                    |
| Otu01282 | k                                                                                                                  | Fungi(100);p | Basidiomycota(100);c      | Agaricomycetes(100);o                                                                      | Thelephorales(100);f                        | Thelephoraceae(100);g                        | Tomentella(100);s                       | Tomentella badia(84);                             |
| Otu01284 | k                                                                                                                  | Fungi(100);p | Ascomycota(100);c         | Dothideomycetes(100);o                                                                     | Dothideomycetes order Incertae sedis(100);f | Eremomycetaceae(100);g                       | Arthrographis(100);s                    | Arthrographis lignicola(100);                     |
| Otu01285 | k                                                                                                                  | Fungi(100);p | Basidiomycota(100);c      | Microbotryomycetes(100);o                                                                  | Sporidiobolales(100);f                      | Sporidiobolales family Incertae sedis(100);g | Rhodotorula(100);s                      | Rhodotorula lignophila(84);                       |
| Otu01286 | k                                                                                                                  | Fungi(100);p | Basidiomycota(100);c      | Agaricomycetes(100);o                                                                      | Polyporales(100);f                          | unclassified Polyporales(100);g              | unclassified Polyporales(100);s         | Polyporales sp(100);                              |
| Otu01287 | k                                                                                                                  | Fungi(100);p | Ascomycota(100);c         | Dothideomycetes(100);o                                                                     | Botryosphaeriales(100);f                    | Botryosphaerellaceae(100);g                  | Dothiorella(100);s                      | Dothiorella sp(100);                              |
| Otu01288 | k                                                                                                                  | Fungi(100);p | Glomeromycota(100);c      | Glomeromycetes(100);o                                                                      | Glomerales(100);f                           | Glomeraceae(100);g                           | Funneliformis(100);s                    | Funneliformis caledonium(100);                    |
| Otu01289 | k                                                                                                                  | Fungi(100);p | Ascomycota(100);c         | unclassified Ascomycota(100);o                                                             | unclassified Ascomycota(100);f              | unclassified Ascomycota(100);g               | unclassified Ascomycota(100);s          | Ascomycota sp(100);                               |
| Otu01290 | k                                                                                                                  | Fungi(100);p | Ascomycota(100);c         | Sordariomycetes(100);o                                                                     | Sordariales(100);f                          | Chaetomiaceae(100);g                         | unclassified Chaetomiaceae(100);s       | Chaetomiaceae sp(100);                            |
| Otu01291 | k                                                                                                                  | Fungi(100);p | Basidiomycota(100);c      | Agaricomycetes(100);o                                                                      | Agaricales(100);f                           | Cortinariaceae(100);g                        | Cortinarius(100);s                      | Cortinarius sp(100);                              |
| Otu01292 | k                                                                                                                  | Fungi(67);p  | Ascomycota(67);c          | unclassified(100);unclassified(100);unclassified(100);unclassified(100);unclassified(100); |                                             |                                              |                                         |                                                   |
| Otu01293 | k                                                                                                                  | Fungi(100);p | Ascomycota(100);c         | Leotiomycetes(100);o                                                                       | Helotiales(100);f                           | unclassified Helotiales(100);g               | unclassified Helotiales(100);s          | Helotiales sp(100);                               |
| Otu01294 | unknown(100);unclassified(100);unclassified(100);unclassified(100);unclassified(100);unclassified(100);            |              |                           |                                                                                            |                                             |                                              |                                         |                                                   |
| Otu01295 | k                                                                                                                  | Fungi(100);p | Basidiomycota(100);c      | Agaricomycetes(100);o                                                                      | Polyporales(100);f                          | Fomitopsidaceae(100);g                       | Fomitopsis(100);s                       | Fomitopsis pinicola(100);                         |
| Otu01296 | k                                                                                                                  | Fungi(100);p | Ascomycota(100);c         | Lecanoromycetes(100);o                                                                     | Umbilicariales(100);f                       | Umbilicariaceae(100);g                       | Fulgidea(100);s                         | Fulgidea sierrae(100);                            |
| Otu01297 | k                                                                                                                  | Fungi(100);p | Basidiomycota(67);c       | Agaricomycetes(67);o                                                                       | Auriculariales(67);f                        | unclassified Auriculariales(67);g            | unclassified Auriculariales(67);s       | Auriculariales sp(67);                            |
| Otu01298 | unknown(67);unclassified(67);unclassified(67);unclassified(67);unclassified(67);unclassified(67);                  |              |                           |                                                                                            |                                             |                                              |                                         |                                                   |
| Otu01299 | k                                                                                                                  | Fungi(100);p | Basidiomycota(100);c      | Agaricomycetes(100);o                                                                      | Cantharellales(100);f                       | Cantharellaceae(100);g                       | Cantharellus(100);s                     | Cantharellus cibarius var roseocanus(100);        |
| Otu01300 | k                                                                                                                  | Fungi(100);p | Basidiomycota(84);c       | Agaricomycetes(84);o                                                                       | Auriculariales(84);f                        | unclassified Auriculariales(84);g            | unclassified Auriculariales(84);s       | Auriculariales sp(84);                            |
| Otu01301 | k                                                                                                                  | Fungi(100);p | Basidiomycota(100);c      | Agaricomycetes(100);o                                                                      | Atheliales(100);f                           | Atheliaceae(100);g                           | Piloderma(100);s                        | Piloderma sphaerosporum(100);                     |
| Otu01303 | k                                                                                                                  | Fungi(100);p | Ascomycota(100);c         | Eurotiomycetes(100);o                                                                      | Chaetothyriales(100);f                      | unclassified Chaetothyriales(100);g          | unclassified Chaetothyriales(100);s     | Chaetothyriales sp(100);                          |
| Otu01304 | k                                                                                                                  | Fungi(84);p  | Ascomycota(84);c          | Eurotiomycetes(84);o                                                                       | Eurotiales(84);f                            | Trichocomaceae(84);g                         | Aspergillus(84);s                       | Aspergillus flavus(84);                           |

Supplementary, TableS1A  
 Taxonomy of OTUs  
 Normalized data, identification according to blast UNITEv7

|          |                                                                                                                                |                                                                                                                                                                                                              |
|----------|--------------------------------------------------------------------------------------------------------------------------------|--------------------------------------------------------------------------------------------------------------------------------------------------------------------------------------------------------------|
| Otu01305 | k                                                                                                                              | Fungi(100);unclassified(100);unclassified(100);unclassified(100);unclassified(100);unclassified(100);unclassified(100);                                                                                      |
| Otu01306 | k                                                                                                                              | Fungi(100);p Ascomycota(100);c Saccharomycetes(100);o Saccharomycetales(100);f Saccharomycetales family Incertae sedis(100);g Spathaspora(100);s Spathaspora arborariae(100);                                |
| Otu01307 | unknown(100);unclassified(100);unclassified(100);unclassified(100);unclassified(100);unclassified(100);unclassified(100);      |                                                                                                                                                                                                              |
| Otu01308 | k                                                                                                                              | Fungi(100);p Ascomycota(100);c Leotiomyces(100);o Helotiales(100);f unclassified Helotiales(100);g unclassified Helotiales(100);s Helotiales sp(100);                                                        |
| Otu01310 | k                                                                                                                              | Fungi(100);p Ascomycota(100);c Dothideomycetes(100);o Capnodiales(100);f unclassified Capnodiales(100);g unclassified Capnodiales(100);s Capnodiales sp(100);                                                |
| Otu01311 | k                                                                                                                              | Fungi(100);p Ascomycota(100);c Leotiomyces(100);o Helotiales(100);f unclassified Helotiales(67);g unclassified Helotiales(67);s Helotiales sp(67);                                                           |
| Otu01312 | k                                                                                                                              | Fungi(100);p Ascomycota(100);c Leotiomyces(100);o Helotiales(100);f Helotiales family Incertae sedis(100);g Scytalidium(84);s Scytalidium cuboideum(84);                                                     |
| Otu01313 | k                                                                                                                              | Fungi(100);p Zygomycota(100);c Zygomycota class Incertae sedis(100);o Mortierellales(100);f Mortierellaceae(100);g Mortierella(100);s Mortierella sp(100);                                                   |
| Otu01315 | unclassified(100);unclassified(100);unclassified(100);unclassified(100);unclassified(100);unclassified(100);unclassified(100); |                                                                                                                                                                                                              |
| Otu01316 | k                                                                                                                              | Fungi(100);p Ascomycota(100);c Pezizomycetes(100);o Pezizales(100);f Pyrenomataceae(100);g unclassified Pyrenomataceae(100);s Pyrenomataceae sp(100);                                                        |
| Otu01318 | k                                                                                                                              | Fungi(84);p Ascomycota(84);c Saccharomycetes(84);o Saccharomycetales(84);f Saccharomycetales family Incertae sedis(84);g Candida(84);s Candida litseae(84);                                                  |
| Otu01319 | k                                                                                                                              | Fungi(100);p Basidiomycota(100);c Agaricomycetes(100);o Russulales(100);f Bondarzewiaceae(100);g Heterobasidion(100);s Heterobasidion parviporum(100);                                                       |
| Otu01320 | k                                                                                                                              | Fungi(100);p Ascomycota(100);c Leotiomyces(84);o Helotiales(84);f unclassified Helotiales(67);g unclassified Helotiales(67);s Helotiales sp(67);                                                             |
| Otu01321 | k                                                                                                                              | Fungi(100);p Ascomycota(100);c Pezizomycetes(100);o Pezizales(100);f Pyrenomataceae(100);g Geopora(100);s Geopora sp(100);                                                                                   |
| Otu01322 | k                                                                                                                              | Fungi(84);p Ascomycota(84);c Sordariomycetes(84);o Ophiostomatales(84);f Ophiostomataceae(84);g Ophiostoma(84);s Ophiostoma denticulatum(84);                                                                |
| Otu01324 | k                                                                                                                              | Fungi(100);p Zygomycota(100);c Zygomycota class Incertae sedis(100);o Mortierellales(100);f Mortierellaceae(100);g Mortierella(100);s Mortierella sp(100);                                                   |
| Otu01325 | k                                                                                                                              | Fungi(84);p Zygomycota(84);c Zygomycota class Incertae sedis(84);o Basidiobolales(84);f Basidiobolaceae(84);g Schizangiella(84);s Schizangiella serpentina(84);                                              |
| Otu01326 | k                                                                                                                              | Fungi(100);p Basidiomycota(100);c Tremellomycetes(100);o Tremellales(100);f Tremellales family Incertae sedis(100);g Cryptococcus(84);s Cryptococcus sp(84);                                                 |
| Otu01327 | k                                                                                                                              | Fungi(100);p Basidiomycota(100);c Agaricomycetes(100);o Atheliales(100);f Atheliaceae(100);g Piloderma(100);s Piloderma sp(100);                                                                             |
| Otu01328 | k                                                                                                                              | Fungi(100);p Basidiomycota(100);c Agaricomycetes(100);o Boletales(100);f Suillaceae(100);g Suillus(100);s Suillus pseudobrevipes(100);                                                                       |
| Otu01329 | k                                                                                                                              | Fungi(100);p Ascomycota(100);c Leotiomyces(100);o Erysiphales(100);f Erysiphaceae(100);g Podosphaera(100);s Podosphaera sp(100);                                                                             |
| Otu01330 | k                                                                                                                              | Fungi(100);p Basidiomycota(100);c Tremellomycetes(100);o Filobasidiales(100);f Filobasidiaceae(100);g Cryptococcus(100);s Cryptococcus huempii(100);                                                         |
| Otu01331 | k                                                                                                                              | Fungi(100);p Basidiomycota(100);c Agaricomycetes(100);o Atheliales(100);f Atheliaceae(100);g Piloderma(100);s Piloderma sp(100);                                                                             |
| Otu01332 | k                                                                                                                              | Fungi(100);p Ascomycota(100);c Dothideomycetes(100);o Capnodiales(100);f Mycosphaerellales(100);g Mycosphaerella(100);s Mycosphaerella pyri(100);                                                            |
| Otu01333 | k                                                                                                                              | Fungi(100);p Basidiomycota(100);c Microbotryomycetes(100);o unclassified Microbotryomycetes(100);f unclassified Microbotryomycetes(100);g unclassified Microbotryomycetes(100);s Microbotryomycetes sp(100); |
| Otu01334 | k                                                                                                                              | Fungi(100);p Basidiomycota(100);c Tremellomycetes(100);o unclassified Tremellomycetes(100);f unclassified Tremellomycetes(100);g unclassified Tremellomycetes(100);s Tremellomycetes sp(100);                |
| Otu01335 | k                                                                                                                              | Fungi(100);p Basidiomycota(100);c Tremellomycetes(100);o Tremellales(100);f unclassified Tremellales(84);g unclassified Tremellales(84);s Tremellales sp(84);                                                |
| Otu01336 | k                                                                                                                              | Fungi(84);p Ascomycota(84);c Pezizomycetes(84);o Pezizales(84);f Pyrenomataceae(84);g Geopora(84);s Geopora sp(84);                                                                                          |
| Otu01337 | k                                                                                                                              | Fungi(100);p Ascomycota(100);c Sordariomycetes(100);o Hypocreales(100);f Nectriaceae(100);g Fusarium(100);s Fusarium sp(100);                                                                                |
| Otu01339 | k                                                                                                                              | Fungi(100);p Ascomycota(100);c Leotiomyces(100);o Helotiales(100);f Dermateaceae(100);g unclassified Dermateaceae(100);s Dermateaceae sp(100);                                                               |
| Otu01340 | k                                                                                                                              | Fungi(100);p Ascomycota(100);c Sordariomycetes(100);o Ophiostomatales(100);f Ophiostomataceae(100);g Leptographium(100);s Leptographium piriforme(100);                                                      |
| Otu01341 | k                                                                                                                              | Fungi(100);p Basidiomycota(100);c Microbotryomycetes(100);o Sporidiobolales(100);f unclassified Sporidiobolales(100);g unclassified Sporidiobolales(100);s Sporidiobolales sp(100);                          |
| Otu01342 | k                                                                                                                              | Fungi(100);p Basidiomycota(100);c unclassified Basidiomycota(100);o unclassified Basidiomycota(100);f unclassified Basidiomycota(100);g unclassified Basidiomycota(100);s Basidiomycota sp(100);             |
| Otu01343 | k                                                                                                                              | Fungi(100);p Basidiomycota(100);c Agaricomycetes(100);o Agaricales(100);f Entolomataceae(100);g unclassified Entolomataceae(100);s Entolomataceae sp(100);                                                   |
| Otu01344 | k                                                                                                                              | Fungi(84);p Basidiomycota(84);c Agaricomycetes(84);o Polyporales(84);f Fomitopsidaceae(84);g Anomoloma(84);s Anomoloma myceliosum(84);                                                                       |
| Otu01345 | k                                                                                                                              | Fungi(100);p Basidiomycota(100);c Agaricomycetes(100);o Thelephorales(100);f Thelephoraceae(100);g Tomentella(67);s Tomentella sp(67);                                                                       |
| Otu01346 | k                                                                                                                              | Fungi(100);p Ascomycota(100);c Sordariomycetes(100);o Ophiostomatales(100);f Ophiostomataceae(100);g Raffaelea(100);s Raffaelea quercivora(100);                                                             |
| Otu01347 | unknown(100);unclassified(100);unclassified(100);unclassified(100);unclassified(100);unclassified(100);unclassified(100);      |                                                                                                                                                                                                              |
| Otu01348 | k                                                                                                                              | Fungi(67);p Glomeromycota(67);c Glomeromycetes(67);o Glomerales(67);f Glomeraceae(67);g unclassified Glomeraceae(67);s Glomeraceae sp(67);                                                                   |
| Otu01349 | unknown(67);unclassified(67);unclassified(67);unclassified(67);unclassified(67);unclassified(67);unclassified(67);             |                                                                                                                                                                                                              |
| Otu01350 | k                                                                                                                              | Fungi(100);p Ascomycota(100);c Eurotiomycetes(100);o Chaetothiales(100);f unclassified Chaetothiales(100);g unclassified Chaetothiales(100);s Chaetothiales sp(100);                                         |
| Otu01351 | unknown(100);unclassified(100);unclassified(100);unclassified(100);unclassified(100);unclassified(100);unclassified(100);      |                                                                                                                                                                                                              |
| Otu01352 | unknown(100);unclassified(100);unclassified(100);unclassified(100);unclassified(100);unclassified(100);unclassified(100);      |                                                                                                                                                                                                              |
| Otu01353 | k                                                                                                                              | Fungi(100);p Basidiomycota(100);c Agaricomycetes(100);o unclassified Agaricomycetes(100);f unclassified Agaricomycetes(100);g unclassified Agaricomycetes(100);s Agaricomycetes sp(100);                     |
| Otu01354 | k                                                                                                                              | Fungi(100);p Ascomycota(100);c Orbiliomycetes(100);o Orbiliales(100);f Orbiliaceae(100);g Arthrotrichy(100);s Arthrotrichy thauasia(100);                                                                    |
| Otu01356 | k                                                                                                                              | Fungi(67);p Ascomycota(67);c Sordariomycetes(67);o Ophiostomatales(67);f Ophiostomataceae(67);g Ophiostoma(67);s Ophiostoma denticulatum(67);                                                                |
| Otu01357 | k                                                                                                                              | Fungi(100);p Basidiomycota(100);c Microbotryomycetes(100);o Sporidiobolales(100);f unclassified Sporidiobolales(100);g unclassified Sporidiobolales(100);s Sporidiobolales sp(100);                          |
| Otu01359 | k                                                                                                                              | Fungi(100);p Basidiomycota(100);c Agaricomycetes(100);o Polyporales(100);f Fomitopsidaceae(100);g Postia(100);s Postia sp(100);                                                                              |
| Otu01360 | k                                                                                                                              | Fungi(100);p Ascomycota(100);c Leotiomyces(100);o Helotiales(100);f Dermateaceae(100);g unclassified Dermateaceae(100);s Dermateaceae sp(100);                                                               |
| Otu01361 | k                                                                                                                              | Fungi(100);p Ascomycota(100);c Dothideomycetes(100);o Venturiales(100);f Venturiaceae(100);g unclassified Venturiaceae(100);s Venturiaceae sp(100);                                                          |
| Otu01362 | k                                                                                                                              | Fungi(100);p Basidiomycota(100);c Agaricomycetes(100);o Polyporales(100);f unclassified Polyporales(100);g unclassified Polyporales(100);s Polyporales sp(100);                                              |
| Otu01363 | unknown(100);unclassified(100);unclassified(100);unclassified(100);unclassified(100);unclassified(100);unclassified(100);      |                                                                                                                                                                                                              |
| Otu01364 | k                                                                                                                              | Fungi(100);p Basidiomycota(100);c Agaricomycetes(100);o Agaricales(100);f Cortinariaceae(100);g Cortinarius(100);s Cortinarius laniger(100);                                                                 |
| Otu01365 | unknown(61);unclassified(61);unclassified(61);unclassified(61);unclassified(61);unclassified(61);unclassified(61);             |                                                                                                                                                                                                              |
| Otu01366 | k                                                                                                                              | Fungi(100);p Basidiomycota(100);c Microbotryomycetes(100);o Sporidiobolales(100);f Sporidiobolales family Incertae sedis(100);g Rhodotorula(100);s Rhodotorula yarrowii(100);                                |
| Otu01367 | unknown(100);unclassified(100);unclassified(100);unclassified(100);unclassified(100);unclassified(100);unclassified(100);      |                                                                                                                                                                                                              |
| Otu01368 | k                                                                                                                              | Fungi(100);p Ascomycota(100);c Eurotiomycetes(100);o Chaetothiales(61);f Herpotrichiellaceae(61);g unclassified Herpotrichiellaceae(61);s Herpotrichiellaceae sp(61);                                        |
| Otu01369 | k                                                                                                                              | Fungi(100);p Ascomycota(100);c Eurotiomycetes(100);o Chaetothiales(100);f Herpotrichiellaceae(100);g Capronia(100);s Capronia sp_94006a(100);                                                                |
| Otu01371 | unknown(100);unclassified(100);unclassified(100);unclassified(100);unclassified(100);unclassified(100);unclassified(100);      |                                                                                                                                                                                                              |
| Otu01372 | k                                                                                                                              | Fungi(100);p Basidiomycota(100);c Agaricomycetes(100);o Agaricales(80);f Inocybaceae(80);g Inocybe(80);s Inocybe fuscidula(80);                                                                              |
| Otu01373 | k                                                                                                                              | Fungi(100);p Basidiomycota(100);c Agaricomycetes(100);o Agaricales(100);f Cortinariaceae(100);g Cortinarius(100);s Cortinarius sp(100);                                                                      |
| Otu01374 | k                                                                                                                              | Fungi(100);p Basidiomycota(100);c Microbotryomycetes(100);o Sporidiobolales(100);f Sporidiobolales family Incertae sedis(100);g Rhodotorula(61);s Rhodotorula pilatii(61);                                   |
| Otu01375 | k                                                                                                                              | Fungi(100);p Ascomycota(100);c Leotiomyces(100);o Helotiales(100);f unclassified Helotiales(100);g unclassified Helotiales(100);s Helotiales sp(100);                                                        |
| Otu01376 | k                                                                                                                              | Fungi(100);p Basidiomycota(100);c Microbotryomycetes(100);o Sporidiobolales(100);f Sporidiobolales family Incertae sedis(100);g Rhodotorula(100);s Rhodotorula sp(100);                                      |
| Otu01377 | unknown(100);unclassified(100);unclassified(100);unclassified(100);unclassified(100);unclassified(100);unclassified(100);      |                                                                                                                                                                                                              |
| Otu01378 | k                                                                                                                              | Fungi(100);p Basidiomycota(100);c Agaricomycetes(100);o Sebaciales(100);f Sebacinaceae(100);g Sebacia(100);s Sebacia sp(100);                                                                                |

Supplementary, TableS1A  
 Taxonomy of OTUs  
 Normalized data, identification according to blast UNITEv57

|          |                                                                                                                           |                                                                                                                        |                        |                                        |                                             |                                              |                                        |                                       |
|----------|---------------------------------------------------------------------------------------------------------------------------|------------------------------------------------------------------------------------------------------------------------|------------------------|----------------------------------------|---------------------------------------------|----------------------------------------------|----------------------------------------|---------------------------------------|
| Otu01379 | k                                                                                                                         | Fungi(100);p                                                                                                           | Ascomycota(100);c      | Sordariomycetes(100);o                 | Sordariales(100);f                          | Lasiosphaeriaceae(100);g                     | Podospora(100);s                       | Podospora_cupiformis(100);            |
| Otu01380 | unknown(100);unclassified(100);unclassified(100);unclassified(100);unclassified(100);unclassified(100);unclassified(100); |                                                                                                                        |                        |                                        |                                             |                                              |                                        |                                       |
| Otu01381 | k                                                                                                                         | Fungi(100);p                                                                                                           | Glomeromycota(100);c   | Glomeromycetes(100);o                  | Diversisporales(100);f                      | Diversisporaceae(100);g                      | Diversispora(100);s                    | Diversispora_celata(100);             |
| Otu01382 | k                                                                                                                         | Fungi(100);p                                                                                                           | Basidiomycota(100);c   | Microbotryomycetes(100);o              | Sporidiobolales(100);f                      | Sporidiobolales_family_Incertae_sedis(100);g | Ballistosporymyces(100);s              | Ballistosporymyces_xanthus(100);      |
| Otu01383 | k                                                                                                                         | Fungi(100);p                                                                                                           | Ascomycota(100);c      | Eurotiomycetes(100);o                  | Chaetothyriales(100);f                      | Herpotrichiellaceae(100);g                   | Cladophialophora(100);s                | Cladophialophora_sp_TRN488(61);       |
| Otu01384 | k                                                                                                                         | Fungi(100);p                                                                                                           | Basidiomycota(100);c   | Agaricomycetes(100);o                  | Russulales(100);f                           | Stereaceae(100);g                            | Gloeocystidiellum(100);s               | Gloeocystidiellum_porosum(100);       |
| Otu01385 | k                                                                                                                         | Fungi(100);p                                                                                                           | Basidiomycota(100);c   | Agaricomycetes(100);o                  | Agaricales(100);f                           | Marasmiaceae(100);g                          | Connopus(100);s                        | Connopus_aceratus(100);               |
| Otu01386 | k                                                                                                                         | Fungi(100);p                                                                                                           | Basidiomycota(100);c   | Agaricomycetes(100);o                  | Polyporales(100);f                          | Polyporaceae(100);g                          | Perenniporia(100);s                    | Perenniporia_hattorii(100);           |
| Otu01387 | k                                                                                                                         | Fungi(100);p                                                                                                           | Zygomycota(100);c      | Zygomycota_class_Incertae_sedis(100);o | Mucorales(100);f                            | Umbelopsidaceae(100);g                       | Umbelopsis(100);s                      | Umbelopsis_sp(100);                   |
| Otu01388 | k                                                                                                                         | Fungi(61);unclassified(100);unclassified(100);unclassified(100);unclassified(100);unclassified(100);unclassified(100); |                        |                                        |                                             |                                              |                                        |                                       |
| Otu01389 | k                                                                                                                         | Fungi(100);p                                                                                                           | Basidiomycota(80);c    | Agaricomycetes(80);o                   | Auriculariales(80);f                        | unclassified_Auriculariales(80);g            | unclassified_Auriculariales(80);s      | Auriculariales_sp(80);                |
| Otu01390 | unknown(100);unclassified(100);unclassified(100);unclassified(100);unclassified(100);unclassified(100);unclassified(100); |                                                                                                                        |                        |                                        |                                             |                                              |                                        |                                       |
| Otu01391 | k                                                                                                                         | Fungi(100);p                                                                                                           | Ascomycota(100);c      | Leotiomyces(100);o                     | Helotiales(100);f                           | unclassified_Helotiales(100);g               | unclassified_Helotiales(100);s         | Helotiales_sp(100);                   |
| Otu01393 | k                                                                                                                         | Fungi(100);p                                                                                                           | Ascomycota(100);c      | unclassified_Ascmycota(100);o          | unclassified_Ascmycota(100);f               | unclassified_Ascmycota(100);g                | unclassified_Ascmycota(100);s          | Ascomycota_sp(100);                   |
| Otu01394 | k                                                                                                                         | Fungi(100);p                                                                                                           | Ascomycota(100);c      | Leotiomyces(80);o                      | Helotiales(80);f                            | unclassified_Helotiales(80);g                | unclassified_Helotiales(80);s          | Helotiales_sp(80);                    |
| Otu01395 | k                                                                                                                         | Fungi(100);p                                                                                                           | Ascomycota(100);c      | Dothideomycetes(100);o                 | Dothideomycetes_order_Incertae_sedis(100);f | Myxotrichaceae(100);g                        | Oidiendron(100);s                      | Oidiendron_sp(100);                   |
| Otu01396 | k                                                                                                                         | Fungi(100);p                                                                                                           | Ascomycota(100);c      | Eurotiomycetes(100);o                  | Chaetothyriales(100);f                      | Herpotrichiellaceae(100);g                   | Cladophialophora(100);s                | Cladophialophora_sp(100);             |
| Otu01397 | k                                                                                                                         | Fungi(100);p                                                                                                           | Ascomycota(100);c      | unclassified_Ascmycota(100);o          | unclassified_Ascmycota(100);f               | unclassified_Ascmycota(100);g                | unclassified_Ascmycota(100);s          | Ascomycota_sp(100);                   |
| Otu01398 | k                                                                                                                         | Fungi(100);p                                                                                                           | Ascomycota(100);c      | Leotiomyces(100);o                     | Helotiales(100);f                           | unclassified_Helotiales(100);g               | unclassified_Helotiales(100);s         | Helotiales_sp(100);                   |
| Otu01399 | k                                                                                                                         | Fungi(100);p                                                                                                           | Zygomycota(100);c      | Zygomycota_class_Incertae_sedis(100);o | Mortierellales(100);f                       | Mortierellaceae(100);g                       | Mortierella(100);s                     | Mortierella_zychae(100);              |
| Otu01400 | k                                                                                                                         | Fungi(100);p                                                                                                           | Basidiomycota(100);c   | Exobasidiales(100);o                   | Exobasidiales(100);f                        | unclassified_Exobasidiales(100);g            | unclassified_Exobasidiales(100);s      | Exobasidiales_sp(100);                |
| Otu01401 | k                                                                                                                         | Fungi(100);p                                                                                                           | Ascomycota(80);c       | Dothideomycetes(80);o                  | Pleosporales(80);f                          | unclassified_Pleosporales(80);g              | unclassified_Pleosporales(80);s        | Pleosporales_sp(80);                  |
| Otu01402 | unknown(100);unclassified(100);unclassified(100);unclassified(100);unclassified(100);unclassified(100);unclassified(100); |                                                                                                                        |                        |                                        |                                             |                                              |                                        |                                       |
| Otu01403 | k                                                                                                                         | Fungi(100);p                                                                                                           | Ascomycota(100);c      | Archaeorhizomycetes(100);o             | Archaeorhizomycetes(100);f                  | Archaeorhizomycetaceae(100);g                | Archaeorhizomycetes(100);s             | Archaeorhizomycetes_sp(100);          |
| Otu01404 | k                                                                                                                         | Fungi(100);p                                                                                                           | Basidiomycota(100);c   | Agaricomycetes(100);o                  | Agaricales(100);f                           | Physalacriaceae(100);g                       | Armillaria(100);s                      | Armillaria_ostoyae(100);              |
| Otu01405 | k                                                                                                                         | Fungi(100);p                                                                                                           | Basidiomycota(100);c   | Tremellomycetes(61);o                  | Cystofilobasidiales(61);f                   | unclassified_Cystofilobasidiales(61);g       | unclassified_Cystofilobasidiales(61);s | Cystofilobasidiales_sp(61);           |
| Otu01406 | k                                                                                                                         | Fungi(100);p                                                                                                           | Basidiomycota(100);c   | Agaricomycetes(100);o                  | Agaricales(100);f                           | Cortinariaceae(100);g                        | Cortinarius(100);s                     | Cortinarius_colus(100);               |
| Otu01407 | unknown(100);unclassified(100);unclassified(100);unclassified(100);unclassified(100);unclassified(100);unclassified(100); |                                                                                                                        |                        |                                        |                                             |                                              |                                        |                                       |
| Otu01408 | k                                                                                                                         | Fungi(100);p                                                                                                           | Basidiomycota(100);c   | Agaricomycetes(100);o                  | Thelephorales(100);f                        | Thelephoraceae(100);g                        | Tomentella(100);s                      | Tomentella_terrestris(100);           |
| Otu01410 | unknown(100);unclassified(100);unclassified(100);unclassified(100);unclassified(100);unclassified(100);unclassified(100); |                                                                                                                        |                        |                                        |                                             |                                              |                                        |                                       |
| Otu01411 | k                                                                                                                         | Fungi(100);p                                                                                                           | Basidiomycota(100);c   | Microbotryomycetes(100);o              | Sporidiobolales(100);f                      | unclassified_Sporidiobolales(100);g          | unclassified_Sporidiobolales(100);s    | Sporidiobolales_sp(100);              |
| Otu01412 | k                                                                                                                         | Fungi(100);p                                                                                                           | Basidiomycota(100);c   | unclassified_Basidiomycota(100);o      | unclassified_Basidiomycota(100);f           | unclassified_Basidiomycota(100);g            | unclassified_Basidiomycota(100);s      | Basidiomycota_sp(100);                |
| Otu01413 | k                                                                                                                         | Fungi(100);p                                                                                                           | Basidiomycota(100);c   | Microbotryomycetes(100);o              | Sporidiobolales(100);f                      | Sporidiobolales_family_Incertae_sedis(100);g | Rhodotorula(100);s                     | Rhodotorula_sp_MLB_I(100);            |
| Otu01414 | k                                                                                                                         | Fungi(100);p                                                                                                           | Basidiomycota(100);c   | Agaricomycetes(100);o                  | Atheliales(100);f                           | Atheliales(100);g                            | Piloderma(100);s                       | Piloderma_sphaerosporum(100);         |
| Otu01415 | k                                                                                                                         | Fungi(100);p                                                                                                           | Ascomycota(100);c      | Leotiomyces(100);o                     | Helotiales(100);f                           | Helotiaceae(100);g                           | Heyderia(100);s                        | Heyderia_abietis(100);                |
| Otu01416 | k                                                                                                                         | Fungi(100);p                                                                                                           | Chytridiomycota(100);c | unclassified_Chytridiomycota(100);o    | unclassified_Chytridiomycota(100);f         | unclassified_Chytridiomycota(100);g          | unclassified_Chytridiomycota(100);s    | Chytridiomycota_sp(100);              |
| Otu01417 | k                                                                                                                         | Fungi(100);p                                                                                                           | Ascomycota(100);c      | Dothideomycetes(100);o                 | Dothideomycetes_order_Incertae_sedis(100);f | Pseudeurotiaceae(100);g                      | Pseudeurotium(100);s                   | Pseudeurotium_hygrophilum(100);       |
| Otu01418 | unknown(100);unclassified(100);unclassified(100);unclassified(100);unclassified(100);unclassified(100);unclassified(100); |                                                                                                                        |                        |                                        |                                             |                                              |                                        |                                       |
| Otu01419 | k                                                                                                                         | Fungi(100);p                                                                                                           | Ascomycota(100);c      | Dothideomycetes(100);o                 | Dothideomycetes_order_Incertae_sedis(100);f | Pseudeurotiaceae(100);g                      | unclassified_Pseudeurotiaceae(100);s   | Pseudeurotiaceae_sp(100);             |
| Otu01420 | unknown(100);unclassified(100);unclassified(100);unclassified(100);unclassified(100);unclassified(100);unclassified(100); |                                                                                                                        |                        |                                        |                                             |                                              |                                        |                                       |
| Otu01421 | unknown(100);unclassified(100);unclassified(100);unclassified(100);unclassified(100);unclassified(100);unclassified(100); |                                                                                                                        |                        |                                        |                                             |                                              |                                        |                                       |
| Otu01422 | unknown(100);unclassified(100);unclassified(100);unclassified(100);unclassified(100);unclassified(100);unclassified(100); |                                                                                                                        |                        |                                        |                                             |                                              |                                        |                                       |
| Otu01423 | k                                                                                                                         | Fungi(100);p                                                                                                           | Chytridiomycota(100);c | unclassified_Chytridiomycota(100);o    | unclassified_Chytridiomycota(100);f         | unclassified_Chytridiomycota(100);g          | unclassified_Chytridiomycota(100);s    | Chytridiomycota_sp(100);              |
| Otu01424 | k                                                                                                                         | Fungi(100);p                                                                                                           | Ascomycota(100);c      | Dothideomycetes(100);o                 | Dothideomycetes_order_Incertae_sedis(100);f | Pseudeurotiaceae(100);g                      | unclassified_Pseudeurotiaceae(100);s   | Pseudeurotiaceae_sp(100);             |
| Otu01425 | k                                                                                                                         | Fungi(100);p                                                                                                           | Ascomycota(100);c      | Eurotiomycetes(100);o                  | Verrucariales(100);f                        | Verrucariaceae(100);g                        | Dermatocarpon(100);s                   | Dermatocarpon_dolomiticum(100);       |
| Otu01426 | k                                                                                                                         | Fungi(80);p                                                                                                            | Ascomycota(80);c       | Saccharomycetes(80);o                  | Saccharomycetales(80);f                     | Dipodasaceae(80);g                           | Basidioascus(80);s                     | Basidioascus_magus(80);               |
| Otu01427 | unknown(61);unclassified(61);unclassified(61);unclassified(61);unclassified(61);unclassified(61);unclassified(61);        |                                                                                                                        |                        |                                        |                                             |                                              |                                        |                                       |
| Otu01428 | k                                                                                                                         | Fungi(100);p                                                                                                           | Basidiomycota(100);c   | Agaricomycetes(100);o                  | Thelephorales(100);f                        | Thelephoraceae(100);g                        | Tomentella(100);s                      | Tomentella_terrestris(100);           |
| Otu01429 | unknown(100);unclassified(100);unclassified(100);unclassified(100);unclassified(100);unclassified(100);unclassified(100); |                                                                                                                        |                        |                                        |                                             |                                              |                                        |                                       |
| Otu01430 | k                                                                                                                         | Fungi(100);p                                                                                                           | Basidiomycota(100);c   | Agaricomycetes(100);o                  | Polyporales(100);f                          | Meruliaceae(100);g                           | Hyphoderma(100);s                      | Hyphoderma_praetermissum(100);        |
| Otu01431 | k                                                                                                                         | Fungi(100);p                                                                                                           | Basidiomycota(100);c   | Agaricomycetes(100);o                  | Cantharellales(100);f                       | Hydnaceae(100);g                             | Sistotrema(100);s                      | Sistotrema_sp(100);                   |
| Otu01432 | unknown(100);unclassified(100);unclassified(100);unclassified(100);unclassified(100);unclassified(100);unclassified(100); |                                                                                                                        |                        |                                        |                                             |                                              |                                        |                                       |
| Otu01433 | k                                                                                                                         | Fungi(100);p                                                                                                           | Basidiomycota(100);c   | Agaricomycetes(100);o                  | Thelephorales(100);f                        | Thelephoraceae(100);g                        | Tomentella(100);s                      | Tomentella_subilacina(100);           |
| Otu01434 | k                                                                                                                         | Fungi(100);p                                                                                                           | Rozellomycota(100);c   | unclassified_Rozellomycota(100);o      | unclassified_Rozellomycota(100);f           | unclassified_Rozellomycota(100);g            | unclassified_Rozellomycota(100);s      | Rozellomycota_sp(100);                |
| Otu01435 | k                                                                                                                         | Fungi(80);p                                                                                                            | Rozellomycota(80);c    | unclassified_Rozellomycota(80);o       | unclassified_Rozellomycota(80);f            | unclassified_Rozellomycota(80);g             | unclassified_Rozellomycota(80);s       | Rozellomycota_sp(80);                 |
| Otu01437 | k                                                                                                                         | Fungi(100);p                                                                                                           | Basidiomycota(100);c   | Agaricomycetes(100);o                  | Agaricales(100);f                           | Marasmiaceae(100);g                          | Rhodocollybia(100);s                   | Rhodocollybia_butyracea_f_asema(100); |
| Otu01438 | k                                                                                                                         | Fungi(100);p                                                                                                           | Ascomycota(100);c      | Dothideomycetes(100);o                 | Dothideomycetes_order_Incertae_sedis(100);f | Pseudeurotiaceae(100);g                      | unclassified_Pseudeurotiaceae(100);s   | Pseudeurotiaceae_sp(100);             |
| Otu01439 | k                                                                                                                         | Fungi(100);p                                                                                                           | Zygomycota(100);c      | Zygomycota_class_Incertae_sedis(100);o | Mucorales(100);f                            | Mucoraceae(100);g                            | Mucor(100);s                           | Mucor_sp_XSCG02(100);                 |
| Otu01440 | k                                                                                                                         | Fungi(100);p                                                                                                           | Basidiomycota(100);c   | Agaricomycetes(100);o                  | Agaricales(100);f                           | Strophariaceae(100);g                        | Galerina(100);s                        | Galerina_sp_GM_18_04(80);             |
| Otu01441 | k                                                                                                                         | Fungi(100);p                                                                                                           | Ascomycota(100);c      | Sordariomycetes(100);o                 | Hypocreales(100);f                          | Cordycipitaceae(100);g                       | Beauveria(100);s                       | Beauveria_varroae(100);               |
| Otu01442 | k                                                                                                                         | Fungi(100);p                                                                                                           | Basidiomycota(100);c   | Agaricomycetes(100);o                  | Atheliales(100);f                           | Atheliales(100);g                            | Amphinema(100);s                       | Amphinema_byssoides(100);             |
| Otu01443 | k                                                                                                                         | Fungi(100);p                                                                                                           | Ascomycota(100);c      | Dothideomycetes(100);o                 | Capnodiales(100);f                          | Capnodiales_family_Incertae_sedis(100);g     | Capnobotryella(100);s                  | Capnobotryella_sp(100);               |
| Otu01444 | k                                                                                                                         | Fungi(100);p                                                                                                           | Basidiomycota(100);c   | Wallemiomycetes(100);o                 | Geminibasidiales(100);f                     | Geminibasidiaceae(100);g                     | Geminibasidium(100);s                  | Geminibasidium_donsium(100);          |
| Otu01445 | k                                                                                                                         | Fungi(100);p                                                                                                           | Basidiomycota(100);c   | Microbotryomycetes(100);o              | Sporidiobolales(100);f                      | unclassified_Sporidiobolales(100);g          | unclassified_Sporidiobolales(100);s    | Sporidiobolales_sp(100);              |
| Otu01446 | k                                                                                                                         | Fungi(100);p                                                                                                           | Ascomycota(100);c      | Sordariomycetes(100);o                 | Hypocreales(61);f                           | Nectriaceae(61);g                            | Volutella(61);s                        | Volutella_sp_SJ_2014(61);             |
| Otu01447 | k                                                                                                                         | Fungi(100);p                                                                                                           | Ascomycota(100);c      | Eurotiomycetes(100);o                  | Chaetothyriales(100);f                      | Herpotrichiellaceae(100);g                   | Rhinochlaeniella(100);s                | Rhinochlaeniella_sp_VL271(100);       |

Supplementary, TableS1A  
 Taxonomy of OTUs  
 Normalized data, identification according to blast UNITEv57

|          |                                                                                                                           |              |                      |                                        |                                                |                                                 |                                         |                                       |
|----------|---------------------------------------------------------------------------------------------------------------------------|--------------|----------------------|----------------------------------------|------------------------------------------------|-------------------------------------------------|-----------------------------------------|---------------------------------------|
| Otu01448 | k                                                                                                                         | Fungi(100);p | Ascomycota(100);c    | Dothideomycetes(100);o                 | Dothideomycetes_order_Incertae_sedis(100);f    | Pseudeurotiaceae(100);g                         | unclassified_Pseudeurotiaceae(100);s    | Pseudeurotiaceae_sp(100);             |
| Otu01449 | unknown(100);unclassified(100);unclassified(100);unclassified(100);unclassified(100);unclassified(100);                   |              |                      |                                        |                                                |                                                 |                                         |                                       |
| Otu01450 | k                                                                                                                         | Fungi(100);p | Ascomycota(100);c    | Eurotiomycetes(100);o                  | Chaetothyriales(100);f                         | Herpotrichiellaceae(100);g                      | Cladophialophora(100);s                 | Cladophialophora_sp(100);             |
| Otu01451 | unknown(80);unclassified(80);unclassified(80);unclassified(80);unclassified(80);unclassified(80);unclassified(80);        |              |                      |                                        |                                                |                                                 |                                         |                                       |
| Otu01452 | k                                                                                                                         | Fungi(100);p | Ascomycota(100);c    | Dothideomycetes(100);o                 | Dothideomycetes_order_Incertae_sedis(100);f    | Pseudeurotiaceae(100);g                         | unclassified_Pseudeurotiaceae(100);s    | Pseudeurotiaceae_sp(100);             |
| Otu01454 | k                                                                                                                         | Fungi(100);p | Basidiomycota(100);c | Microbotryomycetes(100);o              | Microbotryomycetes_order_Incertae_sedis(100);f | Microbotryomycetes_family_Incertae_sedis(100);g | Curvibasidium(100);s                    | Curvibasidium_cygnecollum(100);       |
| Otu01455 | k                                                                                                                         | Fungi(100);p | Ascomycota(100);c    | Dothideomycetes(100);o                 | Capnodiales(100);f                             | Davidiellaceae(100);g                           | Cladosporium(100);s                     | Cladosporium_sp(100);                 |
| Otu01456 | unknown(100);unclassified(100);unclassified(100);unclassified(100);unclassified(100);unclassified(100);unclassified(100); |              |                      |                                        |                                                |                                                 |                                         |                                       |
| Otu01457 | k                                                                                                                         | Fungi(100);p | Ascomycota(100);c    | Sordariomycetes(100);o                 | Hypocreales(100);f                             | unclassified_Hypocreales(100);g                 | unclassified_Hypocreales(100);s         | Hypocreales_sp(100);                  |
| Otu01458 | unknown(100);unclassified(100);unclassified(100);unclassified(100);unclassified(100);unclassified(100);unclassified(100); |              |                      |                                        |                                                |                                                 |                                         |                                       |
| Otu01460 | k                                                                                                                         | Fungi(80);p  | Ascomycota(80);c     | Sordariomycetes(80);o                  | Hypocreales(80);f                              | Cordycipitaceae(80);g                           | Isaria(80);s                            | Isaria_fumosorosea(80);               |
| Otu01461 | k                                                                                                                         | Fungi(100);p | Ascomycota(100);c    | Leotiomycetes(100);o                   | Helotiales(100);f                              | unclassified_Helotiales(100);g                  | unclassified_Helotiales(100);s          | Helotiales_sp(100);                   |
| Otu01462 | k                                                                                                                         | Fungi(100);p | Ascomycota(100);c    | Eurotiomycetes(100);o                  | Chaetothyriales(100);f                         | Herpotrichiellaceae(100);g                      | unclassified_Herpotrichiellaceae(100);s | Herpotrichiellaceae_sp(100);          |
| Otu01464 | k                                                                                                                         | Fungi(100);p | Ascomycota(100);c    | Dothideomycetes(100);o                 | Dothideomycetes_order_Incertae_sedis(100);f    | Pseudeurotiaceae(100);g                         | unclassified_Pseudeurotiaceae(100);s    | Pseudeurotiaceae_sp(100);             |
| Otu01465 | k                                                                                                                         | Fungi(100);p | Basidiomycota(100);c | Agaricomycetes(100);o                  | Polyporales(100);f                             | Fomitopsidaceae(100);g                          | Fomitopsis(100);s                       | Fomitopsis_pinicola(100);             |
| Otu01466 | k                                                                                                                         | Fungi(80);p  | Basidiomycota(80);c  | Agaricomycetes(80);o                   | Auriculariales(80);f                           | unclassified_Auriculariales(80);g               | unclassified_Auriculariales(80);s       | Auriculariales_sp(80);                |
| Otu01467 | unknown(100);unclassified(100);unclassified(100);unclassified(100);unclassified(100);unclassified(100);                   |              |                      |                                        |                                                |                                                 |                                         |                                       |
| Otu01468 | k                                                                                                                         | Fungi(100);p | Basidiomycota(100);c | Agaricomycetes(100);o                  | Agaricales(100);f                              | Cortinariaceae(100);g                           | Cortinarius(100);s                      | Cortinarius_sp(100);                  |
| Otu01469 | k                                                                                                                         | Fungi(100);p | Ascomycota(100);c    | Dothideomycetes(100);o                 | Pleosporales(100);f                            | Pleomassariaceae(100);g                         | unclassified_Pleomassariaceae(100);s    | Pleomassariaceae_sp(100);             |
| Otu01470 | k                                                                                                                         | Fungi(100);p | Ascomycota(100);c    | Leotiomycetes(100);o                   | Helotiales(100);f                              | Helotiales_family_Incertae_sedis(100);g         | Leptodontidium(100);s                   | Leptodontidium_sp(100);               |
| Otu01471 | k                                                                                                                         | Fungi(100);p | Zygomycota(100);c    | Zygomycota_class_Incertae_sedis(100);o | Mucorales(100);f                               | Cunninghamellaceae(100);g                       | Absidia(100);s                          | Absidia_caerulea(100);                |
| Otu01472 | k                                                                                                                         | Fungi(100);p | Basidiomycota(100);c | Tremellomycetes(100);o                 | Cystofilobasidiales(100);f                     | Cystofilobasidiaceae(100);g                     | Xanthophyllumycetes(100);s              | Xanthophyllumycetes_dendrorhous(100); |
| Otu01473 | k                                                                                                                         | Fungi(100);p | Basidiomycota(100);c | Agaricomycetes(100);o                  | Hymenochaetales(100);f                         | Schizoporaceae(100);g                           | Hyphodontia(100);s                      | Hyphodontia_hastata(100);             |
| Otu01474 | k                                                                                                                         | Fungi(100);p | Ascomycota(100);c    | Sordariomycetes(100);o                 | Sordariales(100);f                             | Lasiosphaeriaceae(100);g                        | Podospora(100);s                        | Podospora_cupiformis(100);            |
| Otu01475 | k                                                                                                                         | Fungi(100);p | Basidiomycota(100);c | Agaricomycetes(100);o                  | Sebacinales(100);f                             | Sebacinaceae(100);g                             | unclassified_Sebacinaceae(100);s        | uncultured_Sebacina(100);             |
| Otu01476 | k                                                                                                                         | Fungi(100);p | Basidiomycota(100);c | Dacrymycetes(100);o                    | Dacrymycetales(100);f                          | Dacrymycetaceae(100);g                          | Cerinosterus(100);s                     | Cerinosterus_sp(100);                 |
| Otu01477 | k                                                                                                                         | Fungi(100);p | Basidiomycota(100);c | Tremellomycetes(100);o                 | Cystofilobasidiales(100);f                     | unclassified_Cystofilobasidiales(100);g         | unclassified_Cystofilobasidiales(100);s | Cystofilobasidiales_sp(100);          |
| Otu01478 | k                                                                                                                         | Fungi(100);p | Ascomycota(100);c    | Leotiomycetes(100);o                   | Helotiales(100);f                              | Helotiaceae(100);g                              | Crocicreas(100);s                       | Crocicreas_sp(100);                   |
| Otu01479 | k                                                                                                                         | Fungi(100);p | Rozellomycota(100);c | unclassified_Rozellomycota(100);o      | unclassified_Rozellomycota(100);f              | unclassified_Rozellomycota(100);g               | unclassified_Rozellomycota(100);s       | Rozellomycota_sp(100);                |
| Otu01480 | k                                                                                                                         | Fungi(100);p | Basidiomycota(100);c | Agaricomycetes(100);o                  | Boletales(100);f                               | Boletaceae(100);g                               | Chamonixia(100);s                       | Chamonixia_caespitosa(100);           |
| Otu01482 | k                                                                                                                         | Fungi(100);p | Basidiomycota(100);c | Tremellomycetes(100);o                 | Tremellales(100);f                             | Tremellales_family_Incertae_sedis(100);g        | unclassified_Tremellales(100);s         | Tremellales_sp(100);                  |
| Otu01483 | k                                                                                                                         | Fungi(100);p | Basidiomycota(100);c | Microbotryomycetes(100);o              | Sporidiobolales(100);f                         | Sporidiobolales_family_Incertae_sedis(100);g    | Sporobolomyces(100);s                   | Sporobolomyces_linderae(100);         |
| Otu01484 | unknown(100);unclassified(100);unclassified(100);unclassified(100);unclassified(100);unclassified(100);                   |              |                      |                                        |                                                |                                                 |                                         |                                       |
| Otu01486 | k                                                                                                                         | Fungi(100);p | Rozellomycota(100);c | unclassified_Rozellomycota(100);o      | unclassified_Rozellomycota(100);f              | unclassified_Rozellomycota(100);g               | unclassified_Rozellomycota(100);s       | Rozellomycota_sp(100);                |
| Otu01487 | k                                                                                                                         | Fungi(100);p | Ascomycota(100);c    | Dothideomycetes(100);o                 | Pleosporales(100);f                            | Mytiliniidiaceae(100);g                         | Lophium(100);s                          | Lophium_mytilinum(100);               |
| Otu01488 | k                                                                                                                         | Fungi(100);p | Basidiomycota(100);c | Agaricomycetes(100);o                  | Polyporales(100);f                             | Fomitopsidaceae(100);g                          | Anomoloma(100);s                        | Anomoloma_myceliosum(100);            |
| Otu01489 | k                                                                                                                         | Fungi(100);p | Ascomycota(100);c    | Sordariomycetes(100);o                 | Sordariales(100);f                             | unclassified_Sordariales(100);g                 | unclassified_Sordariales(100);s         | Sordariales_sp(100);                  |
| Otu01490 | k                                                                                                                         | Fungi(100);p | Rozellomycota(100);c | unclassified_Rozellomycota(100);o      | unclassified_Rozellomycota(100);f              | unclassified_Rozellomycota(100);g               | unclassified_Rozellomycota(100);s       | Rozellomycota_sp(100);                |
| Otu01491 | k                                                                                                                         | Fungi(100);p | Ascomycota(100);c    | Saccharomycetes(100);o                 | Saccharomycetales(100);f                       | unclassified_Saccharomycetales(100);g           | unclassified_Saccharomycetales(100);s   | Saccharomycetales_sp(100);            |
| Otu01492 | k                                                                                                                         | Fungi(100);p | Ascomycota(100);c    | Leotiomycetes(100);o                   | unclassified_Leotiomycetes(100);f              | unclassified_Leotiomycetes(100);g               | unclassified_Leotiomycetes(100);s       | Leotiomycetes_sp(100);                |
| Otu01494 | k                                                                                                                         | Fungi(100);p | Ascomycota(100);c    | Sordariomycetes(100);o                 | Chaetosphaeriales(100);f                       | Chaetosphaeriaceae(100);g                       | Chaetosphaeria(100);s                   | Chaetosphaeria_sp_KRCF710(100);       |
| Otu01495 | k                                                                                                                         | Fungi(100);p | Zygomycota(100);c    | Zygomycota_class_Incertae_sedis(100);o | Mortierellales(100);f                          | Mortierellaceae(100);g                          | Mortierella(100);s                      | Mortierella_sp_WD32A(80);             |
| Otu01496 | unknown(100);unclassified(100);unclassified(100);unclassified(100);unclassified(100);unclassified(100);unclassified(100); |              |                      |                                        |                                                |                                                 |                                         |                                       |
| Otu01497 | k                                                                                                                         | Fungi(100);p | Basidiomycota(100);c | Agaricomycetes(100);o                  | Trechisporales(100);f                          | unclassified_Trechisporales(100);g              | unclassified_Trechisporales(100);s      | Trechisporales_sp(100);               |
| Otu01498 | k                                                                                                                         | Fungi(100);p | Basidiomycota(100);c | Agaricomycetes(100);o                  | Agaricales(100);f                              | Mycenaceae(100);g                               | Hemimycena(100);s                       | Hemimycena_cucullata(100);            |
| Otu01499 | k                                                                                                                         | Fungi(80);p  | Rozellomycota(80);c  | unclassified_Rozellomycota(80);o       | unclassified_Rozellomycota(80);f               | unclassified_Rozellomycota(80);g                | unclassified_Rozellomycota(80);s        | Rozellomycota_sp(80);                 |
| Otu01501 | k                                                                                                                         | Fungi(100);p | Ascomycota(100);c    | Dothideomycetes(100);o                 | Pleosporales(100);f                            | Pleosporaceae(100);g                            | Curvularia(100);s                       | Curvularia_sp_LH3(100);               |
| Otu01502 | k                                                                                                                         | Fungi(100);p | Ascomycota(100);c    | Archaeorhizomycetes(100);o             | Archaeorhizomycetales(100);f                   | Archaeorhizomycetaceae(100);g                   | Archaeorhizomycetes(100);s              | Archaeorhizomycetes_sp(100);          |
| Otu01503 | unknown(100);unclassified(100);unclassified(100);unclassified(100);unclassified(100);unclassified(100);                   |              |                      |                                        |                                                |                                                 |                                         |                                       |
| Otu01504 | k                                                                                                                         | Fungi(100);p | Ascomycota(100);c    | Sordariomycetes(100);o                 | Xylariales(100);f                              | unclassified_Xylariales(100);g                  | unclassified_Xylariales(100);s          | Xylariales_sp(100);                   |
| Otu01505 | k                                                                                                                         | Fungi(100);p | Basidiomycota(100);c | Agaricomycetes(100);o                  | Thelephorales(100);f                           | Thelephoraceae(100);g                           | unclassified_Thelephoraceae(100);s      | Thelephoraceae_sp(100);               |
| Otu01506 | k                                                                                                                         | Fungi(100);p | Basidiomycota(100);c | Agaricomycetes(100);o                  | Atheliales(100);f                              | Atheliaceae(100);g                              | Piloderma(100);s                        | Piloderma_sp(100);                    |
| Otu01507 | k                                                                                                                         | Fungi(100);p | Basidiomycota(100);c | Agaricomycetes(100);o                  | Agaricales(100);f                              | Inocybaceae(100);g                              | Inocybe(100);s                          | Inocybe_aurea(100);                   |
| Otu01508 | k                                                                                                                         | Fungi(100);p | Basidiomycota(75);c  | Walleniomycetes(75);o                  | Geminibasidiales(75);f                         | Geminibasidiaceae(75);g                         | Geminibasidium(75);s                    | Geminibasidium_hirsutum(75);          |
| Otu01509 | k                                                                                                                         | Fungi(100);p | Ascomycota(100);c    | Eurotiomycetes(100);o                  | Chaetothyriales(100);f                         | unclassified_Chaetothyriales(100);g             | unclassified_Chaetothyriales(100);s     | Chaetothyriales_sp(100);              |
| Otu01510 | k                                                                                                                         | Fungi(100);p | Basidiomycota(100);c | Agaricomycetes(100);o                  | Agaricales(100);f                              | Cortinariaceae(100);g                           | Cortinarius(100);s                      | Cortinarius_raphanoides(100);         |
| Otu01511 | k                                                                                                                         | Fungi(100);p | Ascomycota(100);c    | Sordariomycetes(100);o                 | Hypocreales(100);f                             | Hypocreaceae(100);g                             | Hypocrea(100);s                         | Hypocrea_moravica(100);               |
| Otu01512 | k                                                                                                                         | Fungi(100);p | Ascomycota(100);c    | Leotiomycetes(100);o                   | Helotiales(100);f                              | Helotiaceae(100);g                              | Claussenomyces(100);s                   | Claussenomyces_sp(100);               |
| Otu01514 | k                                                                                                                         | Fungi(100);p | Basidiomycota(100);c | Agaricomycetes(100);o                  | Agaricales(100);f                              | Cortinariaceae(100);g                           | Cortinarius(100);s                      | Cortinarius_sp(100);                  |
| Otu01515 | k                                                                                                                         | Fungi(100);p | Rozellomycota(100);c | unclassified_Rozellomycota(100);o      | unclassified_Rozellomycota(100);f              | unclassified_Rozellomycota(100);g               | unclassified_Rozellomycota(100);s       | Rozellomycota_sp(100);                |
| Otu01516 | k                                                                                                                         | Fungi(100);p | Ascomycota(100);c    | Sordariomycetes(100);o                 | Hypocreales(100);f                             | Cordycipitaceae(100);g                          | unclassified_Cordycipitaceae(100);s     | Cordycipitaceae_sp(100);              |
| Otu01518 | k                                                                                                                         | Fungi(100);p | Ascomycota(100);c    | Sordariomycetes(100);o                 | Sordariomycetes_order_Incertae_sedis(100);f    | Sordariomycetes_family_Incertae_sedis(100);g    | Pleurotheciella(100);s                  | Pleurotheciella_rivularia(100);       |
| Otu01519 | k                                                                                                                         | Fungi(100);p | Basidiomycota(100);c | Agaricomycetes(75);o                   | Agaricales(75);f                               | Mycenaceae(75);g                                | Mycena(75);s                            | Mycena_sp(75);                        |
| Otu01520 | k                                                                                                                         | Fungi(100);p | Basidiomycota(100);c | Agaricomycetes(100);o                  | Agaricales(100);f                              | Cortinariaceae(100);g                           | Cortinarius(100);s                      | Cortinarius_subtortus(100);           |
| Otu01521 | k                                                                                                                         | Fungi(100);p | Basidiomycota(100);c | Microbotryomycetes(100);o              | Sporidiobolales(100);f                         | Sporidiobolales_family_Incertae_sedis(100);g    | Sporobolomyces(100);s                   | Sporobolomyces_inostophilus(100);     |
| Otu01522 | k                                                                                                                         | Fungi(100);p | Basidiomycota(100);c | Agaricomycetes(100);o                  | Atheliales(100);f                              | Atheliaceae(100);g                              | Piloderma(100);s                        | Piloderma_sphaerosporum(100);         |

Supplementary, TableS1A  
 Taxonomy of OTUs  
 Normalized data, identification according to blast UNITEv57

|          |                                                                                                                                |                                                                                                      |                        |                                        |                                                                        |                                              |                                     |                                     |
|----------|--------------------------------------------------------------------------------------------------------------------------------|------------------------------------------------------------------------------------------------------|------------------------|----------------------------------------|------------------------------------------------------------------------|----------------------------------------------|-------------------------------------|-------------------------------------|
| Otu01523 | k                                                                                                                              | Fungi(75);p                                                                                          | Glomeromycota(75);c    | Glomeromycetes(75);o                   | Archaeosporales(75);f                                                  | Archaeosporaceae(75);g                       | unclassified Archaeosporaceae(75);s | Archaeosporaceae_sp(75);            |
| Otu01524 | unknown(100);unclassified(100);unclassified(100);unclassified(100);unclassified(100);unclassified(100);                        |                                                                                                      |                        |                                        |                                                                        |                                              |                                     |                                     |
| Otu01525 | k                                                                                                                              | Fungi(100);p                                                                                         | Basidiomycota(100);c   | Tremellomycetes(100);o                 | unclassified Tremellomycetes(100);f                                    | unclassified Tremellomycetes(100);g          | unclassified Tremellomycetes(100);s | Tremellomycetes_sp(100);            |
| Otu01526 | unknown(100);unclassified(100);unclassified(100);unclassified(100);unclassified(100);unclassified(100);                        |                                                                                                      |                        |                                        |                                                                        |                                              |                                     |                                     |
| Otu01527 | k                                                                                                                              | Fungi(100);p                                                                                         | Ascomycota(100);c      | Leotiomycetes(100);o                   | Helotiales(100);f                                                      | unclassified Helotiales(100);g               | unclassified Helotiales(100);s      | Helotiales_sp(100);                 |
| Otu01528 | k                                                                                                                              | Fungi(100);p                                                                                         | Basidiomycota(100);c   | Agaricomycetes(100);o                  | unclassified Agaricomycetes(100);f                                     | unclassified Agaricomycetes(100);g           | unclassified Agaricomycetes(100);s  | Agaricomycetes_sp(100);             |
| Otu01529 | k                                                                                                                              | Fungi(100);p                                                                                         | Basidiomycota(100);c   | Agaricomycetes(100);o                  | Agaricales(100);f                                                      | Cortinariaceae(100);g                        | Cortinarius(100);s                  | Cortinarius_anomalus(100);          |
| Otu01530 | k                                                                                                                              | Fungi(100);p                                                                                         | Basidiomycota(100);c   | Agaricomycetes(100);o                  | Agaricales(100);f                                                      | Thelephoraceae(100);g                        | Tomentellopsis(100);s               | Tomentellopsis_sp(100);             |
| Otu01531 | k                                                                                                                              | Fungi(100);p                                                                                         | Ascomycota(100);c      | Leotiomycetes(100);o                   | Helotiales(100);f                                                      | Vibriseaceae(100);g                          | Acephala(100);s                     | Acephala_sp_1(100);                 |
| Otu01532 | k                                                                                                                              | Fungi(100);p                                                                                         | Ascomycota(100);c      | Leotiomycetes(100);o                   | Helotiales(100);unclassified(100);unclassified(100);unclassified(100); |                                              |                                     |                                     |
| Otu01533 | k                                                                                                                              | Fungi(100);p                                                                                         | Basidiomycota(100);c   | Microbotryomycetes(100);o              | Sporidiobolales(100);f                                                 | Sporidiobolales_family_Incertae_sedis(100);g | Rhodotorula(100);s                  | Rhodotorula_auriculariae(75);       |
| Otu01534 | k                                                                                                                              | Fungi(100);p                                                                                         | Basidiomycota(100);c   | Agaricomycetes(100);o                  | Cantharellales(100);f                                                  | unclassified Cantharellales(100);g           | unclassified Cantharellales(100);s  | Cantharellales_sp(100);             |
| Otu01535 | k                                                                                                                              | Fungi(100);p                                                                                         | Ascomycota(100);c      | Eurotiomycetes(100);o                  | Chaetothyriales(100);f                                                 | unclassified Chaetothyriales(100);g          | unclassified Chaetothyriales(100);s | Chaetothyriales_sp(100);            |
| Otu01536 | k                                                                                                                              | Fungi(100);p                                                                                         | Zygomycota(100);c      | Zygomycota_class_Incertae_sedis(100);o | Mortierellales(100);f                                                  | Mortierellaceae(100);g                       | Mortierella(100);s                  | Mortierella_sp(100);                |
| Otu01537 | k                                                                                                                              | Fungi(100);p                                                                                         | Basidiomycota(100);c   | Agaricomycetes(100);o                  | Atheliales(100);f                                                      | Atheliaceae(100);g                           | Piloderma(100);s                    | Piloderma_sp(100);                  |
| Otu01539 | k                                                                                                                              | Fungi(75);unclassified(100);unclassified(100);unclassified(100);unclassified(100);unclassified(100); |                        |                                        |                                                                        |                                              |                                     |                                     |
| Otu01541 | k                                                                                                                              | Fungi(100);p                                                                                         | Chytridiomycota(100);c | unclassified Chytridiomycota(100);o    | unclassified Chytridiomycota(100);f                                    | unclassified Chytridiomycota(100);g          | unclassified Chytridiomycota(100);s | Chytridiomycota_sp(100);            |
| Otu01542 | k                                                                                                                              | Fungi(100);p                                                                                         | Basidiomycota(100);c   | Microbotryomycetes(100);o              | Sporidiobolales(100);f                                                 | Sporidiobolales_family_Incertae_sedis(100);g | Sporobolomyces(75);s                | Sporobolomyces_inositolophilus(75); |
| Otu01543 | k                                                                                                                              | Fungi(100);p                                                                                         | Rozellomycota(100);c   | unclassified Rozellomycota(100);o      | unclassified Rozellomycota(100);f                                      | unclassified Rozellomycota(100);g            | unclassified Rozellomycota(100);s   | Rozellomycota_sp(100);              |
| Otu01544 | k                                                                                                                              | Fungi(100);p                                                                                         | Rozellomycota(100);c   | unclassified Rozellomycota(100);o      | unclassified Rozellomycota(100);f                                      | unclassified Rozellomycota(100);g            | unclassified Rozellomycota(100);s   | Rozellomycota_sp(100);              |
| Otu01545 | k                                                                                                                              | Fungi(100);p                                                                                         | Ascomycota(100);c      | Lecanoromycetes(100);o                 | Ostropales(100);f                                                      | Stictidaceae(100);g                          | Cryptodiscus(100);s                 | Cryptodiscus_sp(100);               |
| Otu01546 | k                                                                                                                              | Fungi(100);p                                                                                         | Basidiomycota(100);c   | Agaricomycetes(100);o                  | Boletales(100);f                                                       | Coniophoraceae(100);g                        | Coniophora(100);s                   | Coniophora_arida(100);              |
| Otu01547 | unknown(100);unclassified(100);unclassified(100);unclassified(100);unclassified(100);unclassified(100);                        |                                                                                                      |                        |                                        |                                                                        |                                              |                                     |                                     |
| Otu01548 | k                                                                                                                              | Fungi(100);p                                                                                         | Ascomycota(100);c      | Eurotiomycetes(100);o                  | Eurotiales(100);f                                                      | Trichocomaceae(100);g                        | Talaromyces(100);s                  | Talaromyces_rademirici(100);        |
| Otu01549 | k                                                                                                                              | Fungi(100);p                                                                                         | Basidiomycota(100);c   | Microbotryomycetes(75);o               | Sporidiobolales(75);f                                                  | Sporidiobolales_family_Incertae_sedis(75);g  | unclassified Sporidiobolales(75);s  | Sporidiobolales_sp(75);             |
| Otu01550 | k                                                                                                                              | Fungi(75);p                                                                                          | Basidiomycota(75);c    | Agaricomycetes(75);o                   | Agaricales(75);f                                                       | unclassified Agaricales(75);g                | unclassified Agaricales(75);s       | Agaricales_sp(75);                  |
| Otu01551 | k                                                                                                                              | Fungi(100);p                                                                                         | Basidiomycota(100);c   | Microbotryomycetes(100);o              | Sporidiobolales(100);f                                                 | unclassified Sporidiobolales(100);g          | unclassified Sporidiobolales(100);s | Sporidiobolales_sp(100);            |
| Otu01552 | k                                                                                                                              | Fungi(100);p                                                                                         | Basidiomycota(100);c   | Agaricomycetes(100);o                  | Agaricales(100);f                                                      | Clavariaceae(100);g                          | Clavaria(100);s                     | Clavaria_acuta(100);                |
| Otu01553 | unknown(100);unclassified(100);unclassified(100);unclassified(100);unclassified(100);unclassified(100);                        |                                                                                                      |                        |                                        |                                                                        |                                              |                                     |                                     |
| Otu01554 | k                                                                                                                              | Fungi(100);p                                                                                         | Ascomycota(100);c      | unclassified Ascomycota(100);o         | unclassified Ascomycota(100);f                                         | unclassified Ascomycota(100);g               | unclassified Ascomycota(100);s      | Ascomycota_sp(100);                 |
| Otu01555 | k                                                                                                                              | Fungi(100);p                                                                                         | Basidiomycota(100);c   | Agaricomycetes(100);o                  | Agaricales(100);f                                                      | Clavariaceae(100);g                          | unclassified Clavariaceae(100);s    | Clavariaceae_sp(100);               |
| Otu01556 | k                                                                                                                              | Fungi(100);p                                                                                         | Ascomycota(100);c      | Eurotiomycetes(100);o                  | Eurotiales(100);f                                                      | Elaphomycetaceae(100);g                      | Elaphomyces(100);s                  | Elaphomyces_sp(100);                |
| Otu01557 | unknown(100);unclassified(100);unclassified(100);unclassified(100);unclassified(100);unclassified(100);                        |                                                                                                      |                        |                                        |                                                                        |                                              |                                     |                                     |
| Otu01558 | k                                                                                                                              | Fungi(100);p                                                                                         | Basidiomycota(100);c   | Agaricomycetes(100);o                  | Sebacinales(100);f                                                     | Sebacinaceae(100);g                          | Sebacina(100);s                     | Sebacina_sp(100);                   |
| Otu01559 | unknown(100);unclassified(100);unclassified(100);unclassified(100);unclassified(100);unclassified(100);                        |                                                                                                      |                        |                                        |                                                                        |                                              |                                     |                                     |
| Otu01560 | unknown(100);unclassified(100);unclassified(100);unclassified(100);unclassified(100);unclassified(100);                        |                                                                                                      |                        |                                        |                                                                        |                                              |                                     |                                     |
| Otu01561 | k                                                                                                                              | Fungi(100);p                                                                                         | Basidiomycota(100);c   | Agaricomycetes(100);o                  | Thelephorales(100);f                                                   | Thelephoraceae(100);g                        | unclassified Thelephoraceae(100);s  | Thelephoraceae_sp(100);             |
| Otu01562 | k                                                                                                                              | Fungi(100);p                                                                                         | Ascomycota(100);c      | Leotiomycetes(100);o                   | Rhytismatales(100);f                                                   | Rhytismataceae(100);g                        | unclassified Rhytismataceae(100);s  | Rhytismataceae_sp(100);             |
| Otu01563 | k                                                                                                                              | Fungi(100);p                                                                                         | Basidiomycota(100);c   | Agaricomycetes(100);o                  | Agaricales(100);f                                                      | Cortinariaceae(100);g                        | Cortinarius(100);s                  | Cortinarius_sp(100);                |
| Otu01564 | k                                                                                                                              | Fungi(100);p                                                                                         | Ascomycota(100);c      | Peziomycetes(100);o                    | Pezizales(100);f                                                       | Pyrenomataceae(100);g                        | Geopora(100);s                      | Geopora_sp(100);                    |
| Otu01565 | unknown(100);unclassified(100);unclassified(100);unclassified(100);unclassified(100);unclassified(100);                        |                                                                                                      |                        |                                        |                                                                        |                                              |                                     |                                     |
| Otu01566 | k                                                                                                                              | Fungi(100);p                                                                                         | Ascomycota(100);c      | Sordariomycetes(100);o                 | Hypocreales(100);f                                                     | unclassified Hypocreales(100);g              | unclassified Hypocreales(100);s     | Hypocreales_sp(100);                |
| Otu01567 | k                                                                                                                              | Fungi(75);p                                                                                          | Basidiomycota(75);c    | Microbotryomycetes(75);o               | Sporidiobolales(75);f                                                  | Sporidiobolales_family_Incertae_sedis(75);g  | Sporobolomyces(75);s                | Sporobolomyces_linderae(75);        |
| Otu01568 | unclassified(100);unclassified(100);unclassified(100);unclassified(100);unclassified(100);unclassified(100);                   |                                                                                                      |                        |                                        |                                                                        |                                              |                                     |                                     |
| Otu01570 | k                                                                                                                              | Fungi(100);p                                                                                         | Basidiomycota(100);c   | Microbotryomycetes(100);o              | Sporidiobolales(100);f                                                 | Sporidiobolales_family_Incertae_sedis(100);g | unclassified Sporidiobolales(100);s | Sporidiobolales_sp(100);            |
| Otu01571 | k                                                                                                                              | Fungi(100);p                                                                                         | Ascomycota(100);c      | Sordariomycetes(100);o                 | Hypocreales(75);f                                                      | Hypocreales_family_Incertae_sedis(75);g      | Stachybotrys(75);s                  | Stachybotrys_sp(75);                |
| Otu01572 | k                                                                                                                              | Fungi(100);p                                                                                         | Basidiomycota(100);c   | Agaricomycetes(100);o                  | Atheliales(100);f                                                      | Atheliaceae(100);g                           | unclassified Atheliaceae(100);s     | Atheliaceae_sp(100);                |
| Otu01573 | unknown(100);unclassified(100);unclassified(100);unclassified(100);unclassified(100);unclassified(100);                        |                                                                                                      |                        |                                        |                                                                        |                                              |                                     |                                     |
| Otu01574 | k                                                                                                                              | Fungi(100);p                                                                                         | Basidiomycota(100);c   | Agaricomycetes(100);o                  | Thelephorales(100);f                                                   | Thelephoraceae(100);g                        | Tomentella(100);s                   | Tomentella_sp(100);                 |
| Otu01575 | k                                                                                                                              | Fungi(100);p                                                                                         | Basidiomycota(100);c   | Agaricomycetes(100);o                  | Agaricales(100);f                                                      | Entolomataceae(100);g                        | Nolanea(100);s                      | Nolanea_strictior(100);             |
| Otu01576 | k                                                                                                                              | Fungi(100);p                                                                                         | Basidiomycota(100);c   | Agaricomycetes(100);o                  | Thelephorales(100);f                                                   | Thelephoraceae(100);g                        | Polyozellus(100);s                  | Polyozellus_sp(100);                |
| Otu01577 | unknown(100);unclassified(100);unclassified(100);unclassified(100);unclassified(100);unclassified(100);                        |                                                                                                      |                        |                                        |                                                                        |                                              |                                     |                                     |
| Otu01578 | k                                                                                                                              | Fungi(100);p                                                                                         | Ascomycota(100);c      | Leotiomycetes(100);o                   | Helotiales(100);f                                                      | unclassified Helotiales(100);g               | unclassified Helotiales(100);s      | Helotiales_sp(100);                 |
| Otu01579 | unclassified(100);unclassified(100);unclassified(100);unclassified(100);unclassified(100);unclassified(100);                   |                                                                                                      |                        |                                        |                                                                        |                                              |                                     |                                     |
| Otu01580 | k                                                                                                                              | Fungi(100);p                                                                                         | Basidiomycota(100);c   | Agaricomycetes(100);o                  | Agaricales(100);f                                                      | Cortinariaceae(100);g                        | Cortinarius(100);s                  | Cortinarius_vitosus(100);           |
| Otu01581 | k                                                                                                                              | Fungi(100);p                                                                                         | Ascomycota(100);c      | unclassified Ascomycota(100);o         | unclassified Ascomycota(100);f                                         | unclassified Ascomycota(100);g               | unclassified Ascomycota(100);s      | Ascomycota_sp(100);                 |
| Otu01582 | k                                                                                                                              | Fungi(100);p                                                                                         | Basidiomycota(100);c   | Agaricomycetes(100);o                  | Cantharellales(100);f                                                  | Clavulinaceae(100);g                         | unclassified Clavulinaceae(100);s   | Clavulinaceae_sp(100);              |
| Otu01583 | k                                                                                                                              | Fungi(100);p                                                                                         | Ascomycota(100);c      | unclassified Ascomycota(100);o         | unclassified Ascomycota(100);f                                         | unclassified Ascomycota(100);g               | unclassified Ascomycota(100);s      | Ascomycota_sp(100);                 |
| Otu01584 | unknown(100);unclassified(100);unclassified(100);unclassified(100);unclassified(100);unclassified(100);                        |                                                                                                      |                        |                                        |                                                                        |                                              |                                     |                                     |
| Otu01585 | k                                                                                                                              | Fungi(100);p                                                                                         | Ascomycota(100);c      | Ascomycota_class_Incertae_sedis(100);o | Ascomycota_order_Incertae_sedis(100);f                                 | Ascomycota_family_Incertae_sedis(100);g      | Ochroconis(100);s                   | Ochroconis_sp(100);                 |
| Otu01586 | k                                                                                                                              | Fungi(100);p                                                                                         | Ascomycota(100);c      | Orbiliomycetes(100);o                  | unclassified Orbiliomycetes(100);f                                     | unclassified Orbiliomycetes(100);g           | unclassified Orbiliomycetes(100);s  | Orbiliomycetes_sp(100);             |
| Otu01587 | unknown(75);unclassified(75);unclassified(75);unclassified(75);unclassified(75);                                               |                                                                                                      |                        |                                        |                                                                        |                                              |                                     |                                     |
| Otu01588 | k                                                                                                                              | Fungi(100);p                                                                                         | Ascomycota(100);c      | Dothideomycetes(100);o                 | Capnodiales(100);f                                                     | Teratosphaeriaceae(100);g                    | Devriesia(100);s                    | Devriesia_sp(100);                  |
| Otu01589 | k                                                                                                                              | Fungi(100);p                                                                                         | Basidiomycota(100);c   | Agaricomycetes(100);o                  | Agaricales(100);f                                                      | Clavariaceae(100);g                          | unclassified Clavariaceae(100);s    | Clavariaceae_sp(100);               |
| Otu01590 | k                                                                                                                              | Fungi(100);p                                                                                         | Ascomycota(100);c      | Sordariomycetes(100);o                 | Chaetosphaeriales(100);f                                               | Chaetosphaeriaceae(100);g                    | Chaetosphaeria(100);s               | Chaetosphaeria_sp_olrim419(100);    |
| Otu01591 | unclassified(100);unclassified(100);unclassified(100);unclassified(100);unclassified(100);unclassified(100);unclassified(100); |                                                                                                      |                        |                                        |                                                                        |                                              |                                     |                                     |

Supplementary, TableS1A  
 Taxonomy of OTUs  
 Normalized data, identification according to blast UNITEv57

|          |                                                                                                              |                                                                                                       |                           |                                           |                                             |                                                |                                         |                                         |
|----------|--------------------------------------------------------------------------------------------------------------|-------------------------------------------------------------------------------------------------------|---------------------------|-------------------------------------------|---------------------------------------------|------------------------------------------------|-----------------------------------------|-----------------------------------------|
| Otu01592 | k                                                                                                            | Fungi(75);p                                                                                           | Ascomycota(75);c          | Saccharomycetes(75);o                     | Saccharomycetales(75);f                     | Dipodascaceae(75);g                            | Basidioascus(75);s                      | Basidioascus magus(75);                 |
| Otu01593 | k                                                                                                            | Fungi(100);p                                                                                          | Basidiomycota(100);c      | Microbotryomycetes(100);o                 | Leucosporiales(100);f                       | unclassified Leucosporiales(100);g             | unclassified Leucosporiales(100);s      | Leucosporiales_sp(100);                 |
| Otu01594 | k                                                                                                            | Fungi(100);p                                                                                          | Ascomycota(100);c         | Pezizomycetes(100);o                      | Pezizales(100);f                            | Tuberaceae(100);g                              | Tuber(100);s                            | Tuber_sp(100);                          |
| Otu01595 | k                                                                                                            | Fungi(100);p                                                                                          | Basidiomycota(100);c      | Microbotryomycetes(100);o                 | Sporidiobolales(100);f                      | Sporidiobolales family Incertae sedis(100);g   | Rhodotorula(100);s                      | Rhodotorula lignophila(100);            |
| Otu01596 | k                                                                                                            | Fungi(100);p                                                                                          | unclassified Fungi(100);c | unclassified Fungi(100);o                 | unclassified Fungi(100);f                   | unclassified Fungi(100);g                      | unclassified Fungi(100);s               | Fungi_sp(100);                          |
| Otu01597 | unknown(100);unclassified(100);unclassified(100);unclassified(100);unclassified(100);unclassified(100);      |                                                                                                       |                           |                                           |                                             |                                                |                                         |                                         |
| Otu01598 | k                                                                                                            | Fungi(100);p                                                                                          | Basidiomycota(100);c      | Microbotryomycetes(100);o                 | Sporidiobolales(100);f                      | Sporidiobolales family Incertae sedis(100);g   | Rhodotorula(100);s                      | Rhodotorula hylophila(100);             |
| Otu01600 | k                                                                                                            | Fungi(100);p                                                                                          | Basidiomycota(100);c      | Agaricomycetes(100);o                     | Russulales(100);f                           | Russulaceae(100);g                             | Russula(100);s                          | Russula_sp(100);                        |
| Otu01601 | k                                                                                                            | Fungi(100);p                                                                                          | Ascomycota(100);c         | unclassified Ascomycota(100);o            | unclassified Ascomycota(100);f              | unclassified Ascomycota(100);g                 | unclassified Ascomycota(100);s          | Ascomycota_sp(100);                     |
| Otu01602 | k                                                                                                            | Fungi(100);p                                                                                          | Ascomycota(100);c         | Dothideomycetes(100);o                    | Capnodiales(100);f                          | unclassified Capnodiales(100);g                | unclassified Capnodiales(100);s         | Capnodiales_sp(100);                    |
| Otu01603 | k                                                                                                            | Fungi(100);p                                                                                          | Basidiomycota(100);c      | Agaricomycetes(100);o                     | Cantharellales(100);f                       | Cantharellaceae(100);g                         | Craterellus(100);s                      | Craterellus fallax(100);                |
| Otu01604 | k                                                                                                            | Fungi(100);p                                                                                          | Basidiomycota(100);c      | Agaricomycetes(100);o                     | Auriculariales(100);f                       | unclassified Auriculariales(100);g             | unclassified Auriculariales(100);s      | Auriculariales_sp(100);                 |
| Otu01605 | k                                                                                                            | Fungi(100);p                                                                                          | Ascomycota(100);c         | Dothideomycetes(100);o                    | Dothideomycetes order Incertae sedis(100);f | Pseudeurotiaceae(100);g                        | unclassified Pseudeurotiaceae(100);s    | Pseudeurotiaceae_sp(100);               |
| Otu01606 | k                                                                                                            | Fungi(100);p                                                                                          | Ascomycota(100);c         | Sordariomycetes(100);o                    | Sordariales(100);f                          | Lasiosphaeriaceae(100);g                       | Podospora(100);s                        | Podospora cupiformis(100);              |
| Otu01607 | k                                                                                                            | Fungi(100);p                                                                                          | Basidiomycota(100);c      | Tremellomycetes(100);o                    | unclassified Tremellomycetes(100);f         | unclassified Tremellomycetes(100);g            | unclassified Tremellomycetes(100);s     | Tremellomycetes_sp(100);                |
| Otu01608 | k                                                                                                            | Fungi(75);p                                                                                           | Basidiomycota(75);c       | Agaricomycetes(75);o                      | Polyporales(75);f                           | unclassified Polyporales(75);g                 | unclassified Polyporales(75);s          | Polyporales_sp(75);                     |
| Otu01609 | unclassified(100);unclassified(100);unclassified(100);unclassified(100);unclassified(100);unclassified(100); |                                                                                                       |                           |                                           |                                             |                                                |                                         |                                         |
| Otu01610 | k                                                                                                            | Fungi(100);p                                                                                          | Ascomycota(100);c         | Sordariomycetes(100);o                    | unclassified Sordariomycetes(100);f         | unclassified Sordariomycetes(100);g            | unclassified Sordariomycetes(100);s     | Sordariomycetes_sp(100);                |
| Otu01611 | unclassified(100);unclassified(100);unclassified(100);unclassified(100);unclassified(100);unclassified(100); |                                                                                                       |                           |                                           |                                             |                                                |                                         |                                         |
| Otu01612 | k                                                                                                            | Fungi(100);p                                                                                          | Basidiomycota(100);c      | Wallemiomycetes(100);o                    | Geminibasidiales(100);f                     | Geminibasidiaceae(100);g                       | Geminibasidium(100);s                   | Geminibasidium_sp(100);                 |
| Otu01613 | k                                                                                                            | Fungi(100);p                                                                                          | Ascomycota(100);c         | Saccharomycetes(100);o                    | Saccharomycetales(100);f                    | Saccharomycetales family Incertae sedis(100);g | Candida(100);s                          | Candida_sp(100);                        |
| Otu01614 | k                                                                                                            | Fungi(100);p                                                                                          | Basidiomycota(100);c      | Agaricomycetes(100);o                     | Agaricales(100);f                           | Amanitaceae(100);g                             | Amanita(100);s                          | Amanita sp cinnamomescens(100);         |
| Otu01615 | k                                                                                                            | Fungi(100);p                                                                                          | Basidiomycota(100);c      | Agaricomycetes(100);o                     | Agaricales(100);f                           | Cortinariaceae(100);g                          | Cortinarius(100);s                      | Cortinarius_sp(75);                     |
| Otu01616 | k                                                                                                            | Fungi(100);p                                                                                          | Chytridiomycota(100);c    | Chytridiomycetes(100);o                   | Rhizophydiales(100);f                       | Rhizophydiaceae(100);g                         | Rhizophyidium(100);s                    | Rhizophyidium_sp(100);                  |
| Otu01617 | k                                                                                                            | Fungi(100);p                                                                                          | Ascomycota(100);c         | Orbiliomycetes(100);o                     | Orbiliales(100);f                           | Orbiliaceae(100);g                             | Dactylella(100);s                       | Dactylella oviparasitica(100);          |
| Otu01618 | unknown(100);unclassified(100);unclassified(100);unclassified(100);unclassified(100);unclassified(100);      |                                                                                                       |                           |                                           |                                             |                                                |                                         |                                         |
| Otu01619 | k                                                                                                            | Fungi(100);p                                                                                          | Basidiomycota(100);c      | Agaricomycetes(100);o                     | Agaricales(100);f                           | Cortinariaceae(100);g                          | Cortinarius(100);s                      | Cortinarius pholideus(100);             |
| Otu01620 | k                                                                                                            | Fungi(100);p                                                                                          | Basidiomycota(100);c      | Agaricomycetes(100);o                     | Sebacinales(100);f                          | unclassified Sebacinales(100);g                | unclassified Sebacinales(100);s         | Sebacinales_sp(100);                    |
| Otu01621 | k                                                                                                            | Fungi(100);p                                                                                          | Basidiomycota(100);c      | Microbotryomycetes(100);o                 | Sporidiobolales(100);f                      | unclassified Sporidiobolales(75);g             | unclassified Sporidiobolales(75);s      | Sporidiobolales_sp(75);                 |
| Otu01622 | k                                                                                                            | Fungi(100);p                                                                                          | Basidiomycota(100);c      | Microbotryomycetes(100);o                 | Sporidiobolales(100);f                      | Sporidiobolales family Incertae sedis(100);g   | Sporobolomyces(100);s                   | Sporobolomyces inostophilus(100);       |
| Otu01623 | unknown(100);unclassified(100);unclassified(100);unclassified(100);unclassified(100);unclassified(100);      |                                                                                                       |                           |                                           |                                             |                                                |                                         |                                         |
| Otu01624 | k                                                                                                            | Fungi(75);p                                                                                           | Rozellomycota(75);c       | unclassified Rozellomycota(75);o          | unclassified Rozellomycota(75);f            | unclassified Rozellomycota(75);g               | unclassified Rozellomycota(75);s        | Rozellomycota_sp(75);                   |
| Otu01626 | k                                                                                                            | Fungi(100);p                                                                                          | Basidiomycota(100);c      | Agaricomycetes(100);o                     | Trechisporales(100);f                       | unclassified Trechisporales(100);g             | unclassified Trechisporales(100);s      | Trechisporales_sp(100);                 |
| Otu01627 | k                                                                                                            | Fungi(100);p                                                                                          | Ascomycota(100);c         | Eurotiomycetes(100);o                     | Verrucariales(100);f                        | Verrucariaceae(100);g                          | Dermatocarpon(100);s                    | Dermatocarpon luridum var luridum(100); |
| Otu01628 | k                                                                                                            | Fungi(100);p                                                                                          | Ascomycota(100);c         | Leotiomyces(100);o                        | Helotiales(100);f                           | Helotiales family Incertae sedis(100);g        | Cadophora(100);s                        | Cadophora_sp_29d(100);                  |
| Otu01629 | unclassified(100);unclassified(100);unclassified(100);unclassified(100);unclassified(100);unclassified(100); |                                                                                                       |                           |                                           |                                             |                                                |                                         |                                         |
| Otu01630 | unknown(100);unclassified(100);unclassified(100);unclassified(100);unclassified(100);unclassified(100);      |                                                                                                       |                           |                                           |                                             |                                                |                                         |                                         |
| Otu01631 | k                                                                                                            | Fungi(100);p                                                                                          | Basidiomycota(100);c      | Agaricomycetes(100);o                     | Sebacinales(100);f                          | Sebacinales Group B(100);g                     | unclassified Sebacinales Group B(100);s | Sebacinales_Group_B_sp(100);            |
| Otu01632 | k                                                                                                            | Fungi(100);p                                                                                          | Basidiomycota(100);c      | Agaricomycetes(100);o                     | Cantharellales(100);f                       | Hydnaceae(100);g                               | Hydnum(100);s                           | Hydnum repandum(100);                   |
| Otu01633 | k                                                                                                            | Fungi(100);p                                                                                          | Ascomycota(100);c         | Sordariomycetes(100);o                    | Ophiostomatales(100);f                      | Ophiostomataceae(100);g                        | Ophiostoma(100);s                       | Ophiostoma allantosporum(75);           |
| Otu01634 | k                                                                                                            | Fungi(100);p                                                                                          | Basidiomycota(100);c      | Agaricomycetes(100);o                     | Boletales(100);f                            | Gomphidiaceae(100);g                           | Chroogomphus(100);s                     | Chroogomphus filiformis(100);           |
| Otu01636 | k                                                                                                            | Fungi(100);p                                                                                          | Ascomycota(100);c         | Leotiomyces(100);o                        | unclassified Leotiomyces(100);f             | unclassified Leotiomyces(100);g                | unclassified Leotiomyces(100);s         | Leotiomyces_sp(100);                    |
| Otu01637 | k                                                                                                            | Fungi(100);unclassified(100);unclassified(100);unclassified(100);unclassified(100);unclassified(100); |                           |                                           |                                             |                                                |                                         |                                         |
| Otu01639 | unknown(100);unclassified(100);unclassified(100);unclassified(100);unclassified(100);unclassified(100);      |                                                                                                       |                           |                                           |                                             |                                                |                                         |                                         |
| Otu01640 | k                                                                                                            | Fungi(100);p                                                                                          | Basidiomycota(100);c      | Agaricomycetes(100);o                     | Polyporales(100);f                          | Polyporaceae(100);g                            | Perenniporia(100);s                     | Perenniporia hattorii(100);             |
| Otu01641 | k                                                                                                            | Fungi(100);p                                                                                          | Zygomycota(100);c         | Zygomycota class Incertae sedis(100);o    | Mortierellales(100);f                       | Mortierellaceae(100);g                         | Mortierella(100);s                      | Mortierella_sp_WD32A(100);              |
| Otu01642 | k                                                                                                            | Fungi(100);p                                                                                          | Basidiomycota(100);c      | Agaricomycetes(100);o                     | Thelephorales(100);f                        | Thelephoraceae(100);g                          | unclassified Thelephoraceae(100);s      | Thelephoraceae_sp(100);                 |
| Otu01643 | k                                                                                                            | Fungi(100);p                                                                                          | Basidiomycota(100);c      | Basidiomycota class Incertae sedis(100);o | Basidiomycota order Incertae sedis(100);f   | Basidiomycota family Incertae sedis(100);g     | Moniliella(100);s                       | Moniliella suaveolens(100);             |
| Otu01644 | k                                                                                                            | Fungi(100);p                                                                                          | Ascomycota(100);c         | Eurotiomycetes(100);o                     | Chaetothiales(100);f                        | unclassified Chaetothiales(100);g              | unclassified Chaetothiales(100);s       | Chaetothiales_sp(100);                  |
| Otu01645 | k                                                                                                            | Fungi(100);p                                                                                          | Ascomycota(100);c         | Leotiomyces(75);o                         | Leotiomyces order Incertae sedis(75);f      | Leotiomyces family Incertae sedis(75);g        | Meliniomyces(75);s                      | Meliniomyces_sp(75);                    |
| Otu01646 | unknown(100);unclassified(100);unclassified(100);unclassified(100);unclassified(100);unclassified(100);      |                                                                                                       |                           |                                           |                                             |                                                |                                         |                                         |
| Otu01648 | k                                                                                                            | Fungi(100);p                                                                                          | Ascomycota(100);c         | Eurotiomycetes(100);o                     | Eurotiomycetes order Incertae sedis(100);f  | Eurotiomycetes family Incertae sedis(100);g    | Sarcinomyces(100);s                     | Sarcinomyces_sp_MA_4620(100);           |
| Otu01649 | k                                                                                                            | Fungi(100);p                                                                                          | Basidiomycota(100);c      | Agaricomycetes(100);o                     | Sebacinales(100);f                          | Sebacinaceae(100);g                            | unclassified Sebacinaceae(100);s        | Sebacinaceae_sp(100);                   |
| Otu01650 | k                                                                                                            | Fungi(100);p                                                                                          | Ascomycota(100);c         | Sordariomycetes(100);o                    | Hypocreales(100);f                          | Cordycipitaceae(100);g                         | unclassified(100);unclassified(100);    |                                         |
| Otu01651 | k                                                                                                            | Fungi(100);p                                                                                          | Ascomycota(100);c         | Dothideomycetes(100);o                    | Capnodiales(100);f                          | Teratosphaeriaceae(100);g                      | Penidiella(100);s                       | Penidiella_sp(100);                     |
| Otu01652 | k                                                                                                            | Fungi(100);p                                                                                          | Basidiomycota(100);c      | Agaricomycetes(100);o                     | Agaricales(100);f                           | Pluteaceae(100);g                              | Pluteus(100);s                          | Pluteus atromarginatus(100);            |
| Otu01653 | k                                                                                                            | Fungi(75);p                                                                                           | Chytridiomycota(75);c     | unclassified Chytridiomycota(75);o        | unclassified Chytridiomycota(75);f          | unclassified Chytridiomycota(75);g             | unclassified Chytridiomycota(75);s      | Chytridiomycota_sp(75);                 |
| Otu01654 | unclassified(100);unclassified(100);unclassified(100);unclassified(100);unclassified(100);unclassified(100); |                                                                                                       |                           |                                           |                                             |                                                |                                         |                                         |
| Otu01655 | k                                                                                                            | Fungi(100);p                                                                                          | Ascomycota(100);c         | Pezizomycetes(100);o                      | Pezizales(100);f                            | Peizaceae(100);g                               | Calongea(100);s                         | Calongea prieguensis(100);              |
| Otu01656 | k                                                                                                            | Fungi(100);p                                                                                          | Basidiomycota(100);c      | Agaricomycetes(100);o                     | Agaricales(100);f                           | unclassified Agaricales(75);g                  | unclassified Agaricales(75);s           | Agaricales_sp(75);                      |
| Otu01657 | k                                                                                                            | Fungi(100);p                                                                                          | Basidiomycota(100);c      | unclassified Basidiomycota(100);o         | unclassified Basidiomycota(100);f           | unclassified Basidiomycota(100);g              | unclassified Basidiomycota(100);s       | Basidiomycota_sp(100);                  |
| Otu01658 | k                                                                                                            | Fungi(75);p                                                                                           | Ascomycota(75);c          | Dothideomycetes(75);o                     | unclassified Dothideomycetes(75);f          | unclassified Dothideomycetes(75);g             | unclassified Dothideomycetes(75);s      | Dothideomycetes_sp(75);                 |
| Otu01659 | k                                                                                                            | Fungi(100);p                                                                                          | Basidiomycota(100);c      | Agaricomycetes(100);o                     | Agaricales(100);f                           | Cortinariaceae(100);g                          | Cortinarius(100);s                      | Cortinarius_sp(100);                    |
| Otu01660 | k                                                                                                            | Fungi(100);p                                                                                          | Basidiomycota(100);c      | Agaricomycetes(100);o                     | Polyporales(100);f                          | Meripilaceae(100);g                            | Hydnopolyporus(100);s                   | Hydnopolyporus fimbriatus(100);         |
| Otu01661 | k                                                                                                            | Fungi(100);p                                                                                          | Basidiomycota(100);c      | Agaricomycetes(100);o                     | Auriculariales(100);f                       | unclassified Auriculariales(100);g             | unclassified Auriculariales(100);s      | Auriculariales_sp(100);                 |
| Otu01662 | k                                                                                                            | Fungi(100);p                                                                                          | Ascomycota(100);c         | Saccharomycetes(100);o                    | Saccharomycetales(100);f                    | unclassified Saccharomycetales(100);g          | unclassified Saccharomycetales(100);s   | Saccharomycetales_sp(100);              |



Supplementary, TableS1A  
 Taxonomy of OTUs  
 Normalized data, identification according to blast UNITEv7

|          |                                                                                                              |              |                           |                                        |                                        |                                              |                                     |                                |
|----------|--------------------------------------------------------------------------------------------------------------|--------------|---------------------------|----------------------------------------|----------------------------------------|----------------------------------------------|-------------------------------------|--------------------------------|
| Otu01663 | k                                                                                                            | Fungi(100);p | unclassified Fungi(100);c | unclassified Fungi(100);o              | unclassified Fungi(100);f              | unclassified Fungi(100);g                    | unclassified Fungi(100);s           | Fungi_sp(100);                 |
| Otu01665 | k                                                                                                            | Fungi(100);p | Ascomycota(100);c         | Ascomycota class Incertae sedis(100);o | Ascomycota order Incertae sedis(100);f | Ascomycota family Incertae sedis(100);g      | Chalara(100);s                      | Chalara hyalocuspica(100);     |
| Otu01666 | k                                                                                                            | Fungi(100);p | Basidiomycota(100);c      | Agaricomycetes(100);o                  | Atheliales(100);f                      | Atheliaceae(100);g                           | Byssocorticium(100);s               | Byssocorticium_sp(100);        |
| Otu01667 | k                                                                                                            | Fungi(100);p | Ascomycota(100);c         | Leotiomycetes(100);o                   | Helotiales(100);f                      | Helotiaceae(100);g                           | unclassified Helotiaceae(100);s     | Helotiaceae_sp(100);           |
| Otu01669 | k                                                                                                            | Fungi(75);p  | Ascomycota(75);c          | Saccharomycetales(75);o                | Saccharomycetales(75);f                | Dipodascaceae(75);g                          | Basidioascus(75);s                  | Basidioascus_magus(75);        |
| Otu01670 | k                                                                                                            | Fungi(100);p | Basidiomycota(100);c      | Agaricomycetes(100);o                  | unclassified Agaricomycetes(100);f     | unclassified Agaricomycetes(100);g           | unclassified Agaricomycetes(100);s  | Agaricomycetes_sp(100);        |
| Otu01671 | k                                                                                                            | Fungi(100);p | Basidiomycota(100);c      | Agaricomycetes(100);o                  | Auriculariales(100);f                  | unclassified Auriculariales(100);g           | unclassified Auriculariales(100);s  | Auriculariales_sp(100);        |
| Otu01672 | unknown(100);unclassified(100);unclassified(100);unclassified(100);unclassified(100);unclassified(100);      |              |                           |                                        |                                        |                                              |                                     |                                |
| Otu01673 | k                                                                                                            | Fungi(100);p | Ascomycota(100);c         | Eurotiomycetes(100);o                  | Chaetothyriales(100);f                 | unclassified Chaetothyriales(100);g          | unclassified Chaetothyriales(100);s | Chaetothyriales_sp(100);       |
| Otu01674 | unclassified(100);unclassified(100);unclassified(100);unclassified(100);unclassified(100);unclassified(100); |              |                           |                                        |                                        |                                              |                                     |                                |
| Otu01675 | k                                                                                                            | Fungi(100);p | Basidiomycota(100);c      | Tremellomycetes(100);o                 | unclassified Tremellomycetes(100);f    | unclassified Tremellomycetes(100);g          | unclassified Tremellomycetes(100);s | Tremellomycetes_sp(100);       |
| Otu01676 | k                                                                                                            | Fungi(100);p | Basidiomycota(100);c      | Microbotryomycetes(100);o              | Sporidiobolales(100);f                 | Sporidiobolales family Incertae sedis(100);g | Rhodotorula(100);s                  | Rhodotorula_oryzicola(100);    |
| Otu01678 | k                                                                                                            | Fungi(100);p | Basidiomycota(100);c      | Agaricomycetes(100);o                  | Polyporales(100);f                     | unclassified Polyporales(100);g              | unclassified Polyporales(100);s     | Polyporales_sp(100);           |
| Otu01679 | k                                                                                                            | Fungi(100);p | Basidiomycota(100);c      | unclassified Basidiomycota(100);o      | unclassified Basidiomycota(100);f      | unclassified Basidiomycota(100);g            | unclassified Basidiomycota(100);s   | Basidiomycota_sp(100);         |
| Otu01680 | unknown(100);unclassified(100);unclassified(100);unclassified(100);unclassified(100);unclassified(100);      |              |                           |                                        |                                        |                                              |                                     |                                |
| Otu01681 | k                                                                                                            | Fungi(100);p | unclassified Fungi(100);c | unclassified Fungi(100);o              | unclassified Fungi(100);f              | unclassified Fungi(100);g                    | unclassified Fungi(100);s           | Fungi_sp(100);                 |
| Otu01682 | k                                                                                                            | Fungi(100);p | Ascomycota(100);c         | Leotiomycetes(100);o                   | Helotiales(100);f                      | unclassified Helotiales(100);g               | unclassified Helotiales(100);s      | Helotiales_sp(100);            |
| Otu01683 | unknown(100);unclassified(100);unclassified(100);unclassified(100);unclassified(100);unclassified(100);      |              |                           |                                        |                                        |                                              |                                     |                                |
| Otu01684 | k                                                                                                            | Fungi(75);p  | Basidiomycota(75);c       | Wallemiomycetes(75);o                  | Geminibasidiales(75);f                 | Geminibasidiaceae(75);g                      | Geminibasidium(75);s                | Geminibasidium_sp(75);         |
| Otu01686 | k                                                                                                            | Fungi(100);p | Ascomycota(100);c         | Sordariomycetes(100);o                 | Microascales(100);f                    | Ceratocystidaceae(100);g                     | Ceratocystis(100);s                 | Ceratocystis_norvegica(100);   |
| Otu01687 | unknown(100);unclassified(100);unclassified(100);unclassified(100);unclassified(100);unclassified(100);      |              |                           |                                        |                                        |                                              |                                     |                                |
| Otu01688 | k                                                                                                            | Fungi(100);p | Ascomycota(100);c         | Lecanoromycetes(100);o                 | Lecanorales(100);f                     | Parmeliaceae(75);g                           | unclassified(100);s                 | unclassified(100);             |
| Otu01689 | k                                                                                                            | Fungi(100);p | Ascomycota(100);c         | Sordariomycetes(100);o                 | Sordariales(100);f                     | unclassified Sordariales(100);g              | unclassified Sordariales(100);s     | Sordariales_sp(100);           |
| Otu01690 | k                                                                                                            | Fungi(100);p | Glomeromycota(75);c       | Glomeromycetes(75);o                   | Archaeosporales(75);f                  | Archaeosporaceae(75);g                       | unclassified Archaeosporaceae(75);s | Archaeosporaceae_sp(75);       |
| Otu01691 | k                                                                                                            | Fungi(67);p  | Glomeromycota(67);c       | Glomeromycetes(67);o                   | Diversisporales(67);f                  | Diversisporaceae(67);g                       | Diversispora(67);s                  | Diversispora_gibbosa(67);      |
| Otu01692 | k                                                                                                            | Fungi(67);p  | Ascomycota(67);c          | Dothideomycetes(67);o                  | unclassified Dothideomycetes(67);f     | unclassified Dothideomycetes(67);g           | unclassified Dothideomycetes(67);s  | Dothideomycetes_sp(67);        |
| Otu01694 | unknown(100);unclassified(100);unclassified(100);unclassified(100);unclassified(100);unclassified(100);      |              |                           |                                        |                                        |                                              |                                     |                                |
| Otu01695 | k                                                                                                            | Fungi(100);p | Basidiomycota(100);c      | Agaricomycetes(100);o                  | Sebacinales(100);f                     | Sebacinaceae(100);g                          | unclassified Sebacinaceae(100);s    | uncultured Sebacina(100);      |
| Otu01696 | unknown(100);unclassified(100);unclassified(100);unclassified(100);unclassified(100);unclassified(100);      |              |                           |                                        |                                        |                                              |                                     |                                |
| Otu01697 | k                                                                                                            | Fungi(100);p | Ascomycota(100);c         | Sordariomycetes(100);o                 | Coniochaetales(100);f                  | Coniochaetales(100);g                        | Lecythophora(100);s                 | Lecythophora_sp(100);          |
| Otu01698 | k                                                                                                            | Fungi(100);p | Basidiomycota(100);c      | Agaricomycetes(100);o                  | Polyporales(100);f                     | Fomitopsidaceae(100);g                       | Anomoloma(100);s                    | Anomoloma_myceliosum(100);     |
| Otu01699 | k                                                                                                            | Fungi(100);p | Ascomycota(100);c         | Leotiomycetes(100);o                   | Helotiales(100);f                      | unclassified Helotiales(100);g               | unclassified Helotiales(100);s      | Helotiales_sp(100);            |
| Otu01700 | k                                                                                                            | Fungi(100);p | Ascomycota(100);c         | Ascomycota class Incertae sedis(100);o | Ascomycota order Incertae sedis(100);f | Ascomycota family Incertae sedis(100);g      | Chalara(100);s                      | Chalara_microspora(100);       |
| Otu01701 | k                                                                                                            | Fungi(100);p | Basidiomycota(100);c      | Agaricomycetes(100);o                  | Russulales(100);f                      | Russulaceae(100);g                           | Lactarius(100);s                    | Lactarius_sp(100);             |
| Otu01702 | k                                                                                                            | Fungi(100);p | Ascomycota(100);c         | Leotiomycetes(100);o                   | Helotiales(100);f                      | Helotiaceae(100);g                           | Heyderia(100);s                     | Heyderia_abietis(100);         |
| Otu01703 | k                                                                                                            | Fungi(100);p | Ascomycota(100);c         | Leotiomycetes(100);o                   | unclassified Leotiomycetes(100);f      | unclassified Leotiomycetes(100);g            | unclassified Leotiomycetes(100);s   | Leotiomycetes_sp(100);         |
| Otu01704 | k                                                                                                            | Fungi(100);p | Zygomycota(100);c         | Zygomycota class Incertae sedis(100);o | Mortierellales(100);f                  | Mortierellaceae(100);g                       | Mortierella(100);s                  | Mortierella_sp(100);           |
| Otu01705 | unknown(100);unclassified(100);unclassified(100);unclassified(100);unclassified(100);unclassified(100);      |              |                           |                                        |                                        |                                              |                                     |                                |
| Otu01706 | k                                                                                                            | Fungi(100);p | Ascomycota(100);c         | Leotiomycetes(100);o                   | Helotiales(100);f                      | Hyaloscyphaceae(100);g                       | Arachnopeziza(100);s                | Arachnopeziza_aurata(100);     |
| Otu01707 | k                                                                                                            | Fungi(100);p | Basidiomycota(100);c      | Microbotryomycetes(100);o              | Sporidiobolales(100);f                 | Sporidiobolales family Incertae sedis(100);g | Rhodotorula(100);s                  | Rhodotorula_ingeniosa(100);    |
| Otu01708 | k                                                                                                            | Fungi(67);p  | Ascomycota(67);c          | Saccharomycetes(67);o                  | Saccharomycetales(67);f                | Dipodascaceae(67);g                          | Basidioascus(67);s                  | Basidioascus_magus(67);        |
| Otu01709 | unknown(100);unclassified(100);unclassified(100);unclassified(100);unclassified(100);unclassified(100);      |              |                           |                                        |                                        |                                              |                                     |                                |
| Otu01710 | k                                                                                                            | Fungi(100);p | Basidiomycota(100);c      | Agaricomycetes(100);o                  | Sebacinales(100);f                     | unclassified Sebacinales(100);g              | unclassified Sebacinales(100);s     | Sebacinales_sp(100);           |
| Otu01711 | k                                                                                                            | Fungi(100);p | Basidiomycota(100);c      | Tremellomycetes(100);o                 | Tremellales(100);f                     | Tremellales family Incertae sedis(100);g     | Bandoniozyma(100);s                 | Bandoniozyma_tunnelae(100);    |
| Otu01712 | k                                                                                                            | Fungi(100);p | Ascomycota(100);c         | unclassified Ascomycota(100);o         | unclassified Ascomycota(100);f         | unclassified Ascomycota(100);g               | unclassified Ascomycota(100);s      | Ascomycota_sp(100);            |
| Otu01713 | k                                                                                                            | Fungi(100);p | Basidiomycota(100);c      | Agaricomycetes(100);o                  | Trechisporales(100);f                  | Hydnodontaceae(100);g                        | Trechispora(100);s                  | Trechispora_sp(100);           |
| Otu01714 | k                                                                                                            | Fungi(100);p | Basidiomycota(100);c      | Agaricomycetes(100);o                  | Auriculariales(100);f                  | unclassified Auriculariales(100);g           | unclassified Auriculariales(100);s  | Auriculariales_sp(100);        |
| Otu01715 | k                                                                                                            | Fungi(67);p  | Basidiomycota(67);c       | Agaricomycetes(67);o                   | Agaricales(67);f                       | Hygrophoraceae(67);g                         | Ampulloclitocybe(67);s              | Ampulloclitocybe_clavipes(67); |
| Otu01716 | k                                                                                                            | Fungi(100);p | Basidiomycota(100);c      | Microbotryomycetes(100);o              | Leucosporidiales(67);f                 | Leucosporidiaceae(67);g                      | Leucosporidium(67);s                | Leucosporidium_drummii(67);    |
| Otu01717 | unknown(100);unclassified(100);unclassified(100);unclassified(100);unclassified(100);unclassified(100);      |              |                           |                                        |                                        |                                              |                                     |                                |
| Otu01718 | k                                                                                                            | Fungi(100);p | Basidiomycota(100);c      | Wallemiomycetes(67);o                  | Geminibasidiales(67);f                 | Geminibasidiaceae(67);g                      | Geminibasidium(67);s                | Geminibasidium_hirsutum(67);   |
| Otu01719 | unknown(100);unclassified(100);unclassified(100);unclassified(100);unclassified(100);unclassified(100);      |              |                           |                                        |                                        |                                              |                                     |                                |
| Otu01721 | k                                                                                                            | Fungi(100);p | Ascomycota(100);c         | Dothideomycetes(100);o                 | Dothideales(100);f                     | Dothideaceae(100);g                          | Endoconidioma(100);s                | Endoconidioma_populii(100);    |
| Otu01722 | k                                                                                                            | Fungi(100);p | Ascomycota(100);c         | Saccharomycetes(100);o                 | Saccharomycetales(100);f               | Lipomycetaceae(100);g                        | Lipomyces(100);s                    | Lipomyces_smithiae(100);       |
| Otu01723 | unknown(100);unclassified(100);unclassified(100);unclassified(100);unclassified(100);unclassified(100);      |              |                           |                                        |                                        |                                              |                                     |                                |
| Otu01725 | k                                                                                                            | Fungi(100);p | Ascomycota(100);c         | Leotiomycetes(100);o                   | unclassified Leotiomycetes(100);f      | unclassified Leotiomycetes(100);g            | unclassified Leotiomycetes(100);s   | Leotiomycetes_sp(100);         |
| Otu01726 | k                                                                                                            | Fungi(100);p | Zygomycota(100);c         | Zygomycota class Incertae sedis(100);o | Mortierellales(100);f                  | Mortierellaceae(100);g                       | Mortierella(100);s                  | Mortierella_turficola(100);    |
| Otu01727 | k                                                                                                            | Fungi(100);p | Ascomycota(100);c         | unclassified Ascomycota(100);o         | unclassified Ascomycota(100);f         | unclassified Ascomycota(100);g               | unclassified Ascomycota(100);s      | Ascomycota_sp(100);            |
| Otu01729 | k                                                                                                            | Fungi(100);p | Ascomycota(100);c         | Ascomycota class Incertae sedis(100);o | Ascomycota order Incertae sedis(100);f | Ascomycota family Incertae sedis(100);g      | Sympodiella(100);s                  | Sympodiella_acicola(100);      |
| Otu01730 | unknown(100);unclassified(100);unclassified(100);unclassified(100);unclassified(100);unclassified(100);      |              |                           |                                        |                                        |                                              |                                     |                                |
| Otu01731 | k                                                                                                            | Fungi(100);p | Ascomycota(100);c         | Ascomycota class Incertae sedis(67);o  | Ascomycota order Incertae sedis(67);f  | Ascomycota family Incertae sedis(67);g       | Chalara(67);s                       | Chalara_piceae-abietis(67);    |
| Otu01732 | unknown(100);unclassified(100);unclassified(100);unclassified(100);unclassified(100);unclassified(100);      |              |                           |                                        |                                        |                                              |                                     |                                |
| Otu01733 | k                                                                                                            | Fungi(100);p | Basidiomycota(100);c      | Agaricomycetes(100);o                  | Cantharellales(100);f                  | Ceratobasidiaceae(100);g                     | Ceratobasidium(100);s               | Ceratobasidium_sp(100);        |
| Otu01735 | k                                                                                                            | Fungi(100);p | Ascomycota(100);c         | Eurotiomycetes(100);o                  | Chaetothyriales(100);f                 | Herpotrichiellaceae(100);g                   | Cladophialophora(100);s             | Cladophialophora_sp(100);      |
| Otu01737 | unknown(100);unclassified(100);unclassified(100);unclassified(100);unclassified(100);unclassified(100);      |              |                           |                                        |                                        |                                              |                                     |                                |
| Otu01738 | k                                                                                                            | Fungi(100);p | Ascomycota(100);c         | Sordariomycetes(100);o                 | Microascales(100);f                    | Microasceae(100);g                           | unclassified Microasceae(100);s     | Microasceae_sp(100);           |

Supplementary, TableS1A  
 Taxonomy of OTUs  
 Normalized data, identification according to blast UNITEv57

|          |                                                                                                                           |              |                                   |                                           |                                             |                                            |                                         |                                              |
|----------|---------------------------------------------------------------------------------------------------------------------------|--------------|-----------------------------------|-------------------------------------------|---------------------------------------------|--------------------------------------------|-----------------------------------------|----------------------------------------------|
| Otu01739 | k                                                                                                                         | Fungi(100);p | Ascomycota(100);c                 | Pezizomycetes(100);o                      | Pezizales(100);f                            | Pyronemataceae(100);g                      | unclassified Pyronemataceae(100);s      | Pyronemataceae_sp(100);                      |
| Otu01740 | unknown(100);unclassified(100);unclassified(100);unclassified(100);unclassified(100);unclassified(100);unclassified(100); |              |                                   |                                           |                                             |                                            |                                         |                                              |
| Otu01741 | k                                                                                                                         | Fungi(100);p | Ascomycota(100);c                 | Dothideomycetes(100);o                    | Dothideomycetes_order_Incertae_sedis(100);f | Myxotrichaceae(100);g                      | Oidiodendron(100);s                     | Oidiodendron_griseum(67);                    |
| Otu01742 | k                                                                                                                         | Fungi(100);p | Ascomycota(100);c                 | Lecanoromycetes(100);o                    | Telochistales(100);f                        | Physciaceae(100);g                         | Physciella(100);s                       | Physciella_chloantha(100);                   |
| Otu01743 | k                                                                                                                         | Fungi(100);p | Ascomycota(100);c                 | Eurotiomycetes(100);o                     | Chaetothyriales(100);f                      | Herpotrichiellaceae(100);g                 | unclassified Herpotrichiellaceae(100);s | Herpotrichiellaceae_sp(100);                 |
| Otu01746 | unknown(100);unclassified(100);unclassified(100);unclassified(100);unclassified(100);unclassified(100);unclassified(100); |              |                                   |                                           |                                             |                                            |                                         |                                              |
| Otu01747 | k                                                                                                                         | Fungi(100);p | Ascomycota(100);c                 | Leotiomycetes(100);o                      | Helotiales(100);f                           | Helotiales_family_Incertae_sedis(100);g    | Cadophora(100);s                        | Cadophora_sp_29d(100);                       |
| Otu01748 | k                                                                                                                         | Fungi(100);p | Ascomycota(100);c                 | Leotiomycetes(100);o                      | unclassified Leotiomycetes(100);f           | unclassified Leotiomycetes(100);g          | unclassified Leotiomycetes(100);s       | Leotiomycetes_sp(100);                       |
| Otu01749 | k                                                                                                                         | Fungi(100);p | Ascomycota(100);c                 | Leotiomycetes(100);o                      | Helotiales(100);f                           | Helotiales_family_Incertae_sedis(100);g    | Hyphodiscus(100);s                      | Hyphodiscus_sp_TU_104241(100);               |
| Otu01750 | k                                                                                                                         | Fungi(100);p | Zygomycota(100);c                 | Zygomycota_class_Incertae_sedis(100);o    | Mucorales(100);f                            | Umbelopsidaceae(100);g                     | Umbelopsis(100);s                       | Umbelopsis_isabellina(67);                   |
| Otu01751 | k                                                                                                                         | Fungi(100);p | Ascomycota(100);c                 | Leotiomycetes(100);o                      | Helotiales(100);f                           | Hyaloscyphaeaceae(100);g                   | Lachnum(100);s                          | Lachnum_sp(100);                             |
| Otu01752 | k                                                                                                                         | Fungi(100);p | Ascomycota(100);c                 | Dothideomycetes(100);o                    | Botryosphaerales(100);f                     | Botryosphaeriaceae(100);g                  | Neofusicoccum(100);s                    | Neofusicoccum_eucalyptorum(100);             |
| Otu01756 | k                                                                                                                         | Fungi(100);p | unclassified Fungi(100);c         | unclassified Fungi(100);o                 | unclassified Fungi(100);f                   | unclassified Fungi(100);g                  | unclassified Fungi(100);s               | Fungi_sp(100);                               |
| Otu01757 | k                                                                                                                         | Fungi(100);p | Basidiomycota(100);c              | Agaricomycetes(100);o                     | Sebacinales(100);f                          | Sebacinales_Group_B(100);g                 | unclassified Sebacinales_Group_B(100);s | Sebacinales_Group_B_sp(100);                 |
| Otu01758 | unknown(100);unclassified(100);unclassified(100);unclassified(100);unclassified(100);unclassified(100);unclassified(100); |              |                                   |                                           |                                             |                                            |                                         |                                              |
| Otu01759 | k                                                                                                                         | Fungi(100);p | Zygomycota(100);c                 | Zygomycota_class_Incertae_sedis(100);o    | Mortierellales(100);f                       | Mortierellaceae(100);g                     | Mortierella(100);s                      | Mortierella_sp_1_RB_2011(100);               |
| Otu01760 | unknown(100);unclassified(100);unclassified(100);unclassified(100);unclassified(100);unclassified(100);unclassified(100); |              |                                   |                                           |                                             |                                            |                                         |                                              |
| Otu01762 | k                                                                                                                         | Fungi(100);p | Ascomycota(100);c                 | Leotiomycetes(100);o                      | Helotiales(100);f                           | unclassified Helotiales(100);g             | unclassified Helotiales(100);s          | Helotiales_sp(100);                          |
| Otu01765 | k                                                                                                                         | Fungi(100);p | Ascomycota(100);c                 | unclassified Ascomycota(100);o            | unclassified Ascomycota(100);f              | unclassified Ascomycota(100);g             | unclassified Ascomycota(100);s          | Ascomycota_sp(100);                          |
| Otu01766 | k                                                                                                                         | Fungi(100);p | Basidiomycota(100);c              | Agaricomycetes(100);o                     | Agaricales(100);f                           | Tricholomataceae(67);g                     | unclassified Tricholomataceae(67);s     | Tricholomataceae_sp(67);                     |
| Otu01767 | k                                                                                                                         | Fungi(100);p | unclassified Fungi(100);c         | unclassified Fungi(100);o                 | unclassified Fungi(100);f                   | unclassified Fungi(100);g                  | unclassified Fungi(100);s               | Fungi_sp(100);                               |
| Otu01768 | k                                                                                                                         | Fungi(100);p | Basidiomycota(100);c              | Agaricomycetes(100);o                     | Agaricales(100);f                           | Clavariaceae(100);g                        | unclassified Clavariaceae(100);s        | Clavariaceae_sp(100);                        |
| Otu01769 | unknown(100);unclassified(100);unclassified(100);unclassified(100);unclassified(100);unclassified(100);unclassified(100); |              |                                   |                                           |                                             |                                            |                                         |                                              |
| Otu01771 | unknown(100);unclassified(100);unclassified(100);unclassified(100);unclassified(100);unclassified(100);unclassified(100); |              |                                   |                                           |                                             |                                            |                                         |                                              |
| Otu01773 | k                                                                                                                         | Fungi(100);p | Ascomycota(100);c                 | Eurotiomycetes(100);o                     | Chaetothyriales(100);f                      | Herpotrichiellaceae(100);g                 | unclassified Herpotrichiellaceae(100);s | Herpotrichiellaceae_sp(100);                 |
| Otu01775 | unknown(100);unclassified(100);unclassified(100);unclassified(100);unclassified(100);unclassified(100);unclassified(100); |              |                                   |                                           |                                             |                                            |                                         |                                              |
| Otu01776 | k                                                                                                                         | Fungi(100);p | Glomeromycota(100);c              | Glomeromycetes(100);o                     | Glomerales(100);f                           | Glomeraceae(100);g                         | Funneliformis(100);s                    | Funneliformis_caledonium(100);               |
| Otu01777 | k                                                                                                                         | Fungi(100);p | Ascomycota(100);c                 | Leotiomycetes(100);o                      | Helotiales(100);f                           | Helotiales_family_Incertae_sedis(100);g    | Hyphodiscus(100);s                      | Hyphodiscus_hymeniophilus(100);              |
| Otu01778 | unknown(100);unclassified(100);unclassified(100);unclassified(100);unclassified(100);unclassified(100);unclassified(100); |              |                                   |                                           |                                             |                                            |                                         |                                              |
| Otu01779 | k                                                                                                                         | Fungi(67);p  | unclassified Fungi(67);c          | unclassified Fungi(67);o                  | unclassified Fungi(67);f                    | unclassified Fungi(67);g                   | unclassified Fungi(67);s                | Fungi_sp(67);                                |
| Otu01781 | k                                                                                                                         | Fungi(100);p | Basidiomycota(100);c              | Basidiomycota_class_Incertae_sedis(100);o | Basidiomycota_order_Incertae_sedis(100);f   | Basidiomycota_family_Incertae_sedis(100);g | Moniliella(100);s                       | Moniliella_suaevolens(100);                  |
| Otu01782 | unknown(100);unclassified(100);unclassified(100);unclassified(100);unclassified(100);unclassified(100);unclassified(100); |              |                                   |                                           |                                             |                                            |                                         |                                              |
| Otu01784 | k                                                                                                                         | Fungi(100);p | Basidiomycota(100);c              | Agaricomycetes(100);o                     | Cantharellales(100);f                       | Clavulinaceae(100);g                       | Clavulina(100);s                        | Clavulina_sp(100);                           |
| Otu01785 | k                                                                                                                         | Fungi(100);p | Ascomycota(100);c                 | Ascomycota_class_Incertae_sedis(100);o    | Ascomycota_order_Incertae_sedis(100);f      | Ascomycota_family_Incertae_sedis(100);g    | Triscelophorus(100);s                   | Triscelophorus_cf_acuminatus_UMB_55810(100); |
| Otu01786 | k                                                                                                                         | Fungi(100);p | Basidiomycota(100);c              | unclassified Basidiomycota(100);o         | unclassified Basidiomycota(100);f           | unclassified Basidiomycota(100);g          | unclassified Basidiomycota(100);s       | Basidiomycota_sp(100);                       |
| Otu01787 | k                                                                                                                         | Fungi(100);p | Ascomycota(100);c                 | Sordariomycetes(100);o                    | Ophiostomatales(100);f                      | Ophiostomataceae(100);g                    | Ophiostoma(100);s                       | Ophiostoma_denticiliatum(100);               |
| Otu01788 | k                                                                                                                         | Fungi(100);p | Rozellomycota(100);c              | unclassified Rozellomycota(100);o         | unclassified Rozellomycota(100);f           | unclassified Rozellomycota(100);g          | unclassified Rozellomycota(100);s       | Rozellomycota_sp(100);                       |
| Otu01789 | k                                                                                                                         | Fungi(100);p | Ascomycota(100);c                 | Lecanoromycetes(100);o                    | unclassified Lecanoromycetes(100);f         | unclassified Lecanoromycetes(100);g        | unclassified Lecanoromycetes(100);s     | Lecanoromycetes_sp(100);                     |
| Otu01790 | k                                                                                                                         | Fungi(100);p | Basidiomycota(100);c              | Tremellomycetes(100);o                    | Cystoflobasidiales(100);f                   | Cystoflobasidiaceae(100);g                 | Mrakia(100);s                           | Mrakia_frigida(100);                         |
| Otu01791 | unknown(67);unclassified(67);unclassified(67);unclassified(67);unclassified(67);unclassified(67);unclassified(67);        |              |                                   |                                           |                                             |                                            |                                         |                                              |
| Otu01792 | k                                                                                                                         | Fungi(100);p | Basidiomycota(100);c              | Agaricomycetes(100);o                     | Agaricales(100);f                           | Inocybaceae(100);g                         | Inocybe(100);s                          | Inocybe_leptophylla(100);                    |
| Otu01794 | unknown(100);unclassified(100);unclassified(100);unclassified(100);unclassified(100);unclassified(100);unclassified(100); |              |                                   |                                           |                                             |                                            |                                         |                                              |
| Otu01795 | k                                                                                                                         | Fungi(100);p | Ascomycota(100);c                 | Eurotiomycetes(100);o                     | Verrucariales(100);f                        | Verrucariaceae(100);g                      | Dermatocarpon(100);s                    | Dermatocarpon_luridum_var_luridum(100);      |
| Otu01796 | unknown(100);unclassified(100);unclassified(100);unclassified(100);unclassified(100);unclassified(100);unclassified(100); |              |                                   |                                           |                                             |                                            |                                         |                                              |
| Otu01797 | k                                                                                                                         | Fungi(100);p | Ascomycota(100);c                 | Sordariomycetes(100);o                    | Ophiostomatales(100);f                      | Ophiostomataceae(100);g                    | Ophiostoma(100);s                       | Ophiostoma_denticiliatum(100);               |
| Otu01798 | k                                                                                                                         | Fungi(100);p | Basidiomycota(100);c              | Agaricomycetes(100);o                     | Agaricales(100);f                           | Hygrophoraceae(100);g                      | Lichenomphalia(100);s                   | Lichenomphalia_umbellifera(100);             |
| Otu01799 | k                                                                                                                         | Fungi(100);p | Ascomycota(100);c                 | Archaeorhizomycetes(100);o                | Archaeorhizomycetales(100);f                | Archaeorhizomycetaceae(100);g              | Archaeorhizomyces(100);s                | Archaeorhizomyces_sp(100);                   |
| Otu01800 | k                                                                                                                         | Fungi(100);p | Basidiomycota(100);c              | Agaricomycetes(100);o                     | unclassified Agaricomycetes(100);f          | unclassified Agaricomycetes(100);g         | unclassified Agaricomycetes(100);s      | Agaricomycetes_sp(100);                      |
| Otu01801 | k                                                                                                                         | Fungi(100);p | Basidiomycota(100);c              | Agaricomycetes(100);o                     | Agaricales(100);f                           | Agaricaceae(100);g                         | Cystoderma(100);s                       | Cystoderma_jasonis_var_jasonis(100);         |
| Otu01803 | unknown(100);unclassified(100);unclassified(100);unclassified(100);unclassified(100);unclassified(100);unclassified(100); |              |                                   |                                           |                                             |                                            |                                         |                                              |
| Otu01805 | k                                                                                                                         | Fungi(100);p | Ascomycota(100);c                 | Leotiomycetes(100);o                      | Helotiales(100);f                           | Helotiaceae(100);g                         | Neobulgaria(100);s                      | Neobulgaria_sp_6743_R2(100);                 |
| Otu01806 | k                                                                                                                         | Fungi(100);p | unclassified Fungi(100);c         | unclassified Fungi(100);o                 | unclassified Fungi(100);f                   | unclassified Fungi(100);g                  | unclassified Fungi(100);s               | Fungi_sp(100);                               |
| Otu01807 | unknown(100);unclassified(100);unclassified(100);unclassified(100);unclassified(100);unclassified(100);unclassified(100); |              |                                   |                                           |                                             |                                            |                                         |                                              |
| Otu01808 | k                                                                                                                         | Fungi(100);p | unclassified Fungi(67);c          | unclassified Fungi(67);o                  | unclassified Fungi(67);f                    | unclassified Fungi(67);g                   | unclassified Fungi(67);s                | Fungi_sp(67);                                |
| Otu01809 | k                                                                                                                         | Fungi(100);p | Ascomycota(100);c                 | Dothideomycetes(100);o                    | unclassified Dothideomycetes(100);f         | unclassified Dothideomycetes(100);g        | unclassified Dothideomycetes(100);s     | Dothideomycetes_sp(100);                     |
| Otu01810 | k                                                                                                                         | Fungi(100);p | Basidiomycota(100);c              | Agaricomycetes(100);o                     | Atheliales(100);f                           | Atheliaceae(100);g                         | Piloderma(100);s                        | Piloderma_sp(100);                           |
| Otu01813 | k                                                                                                                         | Fungi(100);p | Chytridiomycota(100);c            | Chytridiomycetes(100);o                   | Rhizophydiales(100);f                       | Rhizophydiaceae(100);g                     | Rhizophydium(100);s                     | Rhizophydium_sp(100);                        |
| Otu01814 | k                                                                                                                         | Fungi(100);p | Ascomycota(100);c                 | Sordariomycetes(100);o                    | Hypocreales(100);f                          | Cordycipitaceae(100);g                     | Lecanicillium(100);s                    | Lecanicillium_primum(100);                   |
| Otu01815 | k                                                                                                                         | Fungi(100);p | Zygomycota(100);c                 | Zygomycota_class_Incertae_sedis(100);o    | Kickxellales(100);f                         | Kickxellaceae(100);g                       | Linderina(100);s                        | Linderina_macrospora(100);                   |
| Otu01816 | k                                                                                                                         | Fungi(100);p | Ascomycota(100);c                 | Sordariomycetes(100);o                    | Xylariales(100);f                           | unclassified Xylariales(100);g             | unclassified Xylariales(100);s          | Xylariales_sp(100);                          |
| Otu01817 | k                                                                                                                         | Fungi(100);p | Basidiomycota(100);c              | Agaricomycetes(100);o                     | Cantharellales(100);f                       | Ceratobasidiaceae(100);g                   | Ceratobasidium(100);s                   | Ceratobasidium_sp(100);                      |
| Otu01820 | k                                                                                                                         | Fungi(100);p | Ascomycota(100);c                 | Sordariomycetes(67);o                     | Ophiostomatales(67);f                       | Ophiostomataceae(67);g                     | Ophiostoma(67);s                        | Ophiostoma_denticiliatum(67);                |
| Otu01822 | k                                                                                                                         | Fungi(100);p | Basidiomycota(100);c              | Agaricomycetes(100);o                     | Geastrales(100);f                           | Geastraceae(100);g                         | Sphaerobolus(100);s                     | Sphaerobolus_stellatus(100);                 |
| Otu01824 | unknown(100);unclassified(100);unclassified(100);unclassified(100);unclassified(100);unclassified(100);unclassified(100); |              |                                   |                                           |                                             |                                            |                                         |                                              |
| Otu01825 | k                                                                                                                         | Fungi(100);p | Ascomycota(100);c                 | Sordariomycetes(100);o                    | Ophiostomatales(100);f                      | Ophiostomataceae(100);g                    | unclassified Ophiostomataceae(100);s    | Ophiostomataceae_sp(100);                    |
| Otu01827 | k                                                                                                                         | Fungi(100);p | Fungi_phylum_Incertae_sedis(67);c | Fungi_class_Incertae_sedis(67);o          | Fungi_order_Incertae_sedis(67);f            | Fungi_family_Incertae_sedis(67);g          | Sclerotium(67);s                        | Sclerotium_cepivorum(67);                    |

Supplementary, TableS1A  
 Taxonomy of OTUs  
 Normalized data, identification according to blast UNITEv57

|          |                                                                                                         |              |                           |                                        |                                           |                                                |                                         |                                               |
|----------|---------------------------------------------------------------------------------------------------------|--------------|---------------------------|----------------------------------------|-------------------------------------------|------------------------------------------------|-----------------------------------------|-----------------------------------------------|
| Otu01828 | k                                                                                                       | Fungi(100);p | Ascomycota(100);c         | Dothideomycetes(100);o                 | unclassified Dothideomycetes(100);f       | unclassified Dothideomycetes(100);g            | unclassified Dothideomycetes(100);s     | Dothideomycetes_sp(100);                      |
| Otu01829 | k                                                                                                       | Fungi(67);p  | Ascomycota(67);c          | Lecanoromycetes(67);o                  | Candelariales(67);f                       | Candelariaceae(67);g                           | Candelariella(67);s                     | Candelariella corallizoides(67);              |
| Otu01830 | unknown(100);unclassified(100);unclassified(100);unclassified(100);unclassified(100);unclassified(100); |              |                           |                                        |                                           |                                                |                                         |                                               |
| Otu01831 | k                                                                                                       | Fungi(100);p | Ascomycota(100);c         | Sordariomycetes(100);o                 | Hypocreales(100);f                        | Clavicipitaceae(100);g                         | Pochonia(100);s                         | Pochonia bulbillosa(100);                     |
| Otu01832 | unknown(100);unclassified(100);unclassified(100);unclassified(100);unclassified(100);unclassified(100); |              |                           |                                        |                                           |                                                |                                         |                                               |
| Otu01834 | unknown(100);unclassified(100);unclassified(100);unclassified(100);unclassified(100);unclassified(100); |              |                           |                                        |                                           |                                                |                                         |                                               |
| Otu01836 | k                                                                                                       | Fungi(100);p | Ascomycota(100);c         | Saccharomycetes(100);o                 | Saccharomycetales(100);f                  | Dipodascaceae(100);g                           | Basidioascus(100);s                     | Basidioascus magus(100);                      |
| Otu01837 | unknown(67);unclassified(67);unclassified(67);unclassified(67);unclassified(67);                        |              |                           |                                        |                                           |                                                |                                         |                                               |
| Otu01838 | k                                                                                                       | Fungi(100);p | Ascomycota(100);c         | Dothideomycetes(100);o                 | Capnodiales(100);f                        | unclassified Capnodiales(100);g                | unclassified Capnodiales(100);s         | Capnodiales_sp(100);                          |
| Otu01839 | unknown(100);unclassified(100);unclassified(100);unclassified(100);unclassified(100);unclassified(100); |              |                           |                                        |                                           |                                                |                                         |                                               |
| Otu01840 | k                                                                                                       | Fungi(100);p | Ascomycota(100);c         | Eurotiomycetes(100);o                  | Chaetothiales(100);f                      | Herpotrichiellaceae(100);g                     | unclassified Herpotrichiellaceae(100);s | Herpotrichiellaceae_sp(100);                  |
| Otu01843 | k                                                                                                       | Fungi(100);p | Basidiomycota(100);c      | Microbotryomycetes(67);o               | Sporidiobolales(67);f                     | Sporidiobolales_family_Incertae_sedis(67);g    | Rhodotorula(67);s                       | Rhodotorula ingenuosa(67);                    |
| Otu01844 | k                                                                                                       | Fungi(67);p  | Glomeromycota(67);c       | Glomeromycetes(67);o                   | Glomerales(67);f                          | Glomeraceae(67);g                              | Funneliformis(67);s                     | Funneliformis caledonium(67);                 |
| Otu01845 | k                                                                                                       | Fungi(100);p | Basidiomycota(100);c      | Agaricomycetes(100);o                  | Hymenochaetales(100);f                    | Hymenochaetaeaceae(100);g                      | Phellinus(100);s                        | Phellinus ferrugineovelutinus(100);           |
| Otu01847 | k                                                                                                       | Fungi(100);p | unclassified Fungi(100);c | unclassified Fungi(100);o              | unclassified Fungi(100);f                 | unclassified Fungi(100);g                      | unclassified Fungi(100);s               | Fungi_sp(100);                                |
| Otu01848 | k                                                                                                       | Fungi(100);p | unclassified Fungi(100);c | unclassified Fungi(100);o              | unclassified Fungi(100);f                 | unclassified Fungi(100);g                      | unclassified Fungi(100);s               | Fungi_sp(100);                                |
| Otu01849 | k                                                                                                       | Fungi(100);p | Zygomycota(100);c         | Zygomycota_class_Incertae_sedis(100);o | Mortierellales(100);f                     | Mortierellaceae(100);g                         | Mortierella(100);s                      | Mortierella amoeboides(100);                  |
| Otu01850 | k                                                                                                       | Fungi(100);p | Basidiomycota(100);c      | Agaricomycetes(100);o                  | Agaricales(100);f                         | Cortinariaceae(100);g                          | unclassified Cortinariaceae(100);s      | Cortinariaceae_sp(100);                       |
| Otu01852 | k                                                                                                       | Fungi(100);p | Ascomycota(100);c         | Lecanoromycetes(100);o                 | Umbilicariales(100);f                     | Umbilicariaceae(100);g                         | Fulgidea(100);s                         | Fulgidea sierrae(100);                        |
| Otu01853 | unknown(100);unclassified(100);unclassified(100);unclassified(100);unclassified(100);unclassified(100); |              |                           |                                        |                                           |                                                |                                         |                                               |
| Otu01854 | k                                                                                                       | Fungi(100);p | Ascomycota(100);c         | Saccharomycetes(100);o                 | Saccharomycetales(100);f                  | Saccharomycetales_family_Incertae_sedis(100);g | Candida(100);s                          | Candida canberransis(100);                    |
| Otu01855 | k                                                                                                       | Fungi(100);p | Ascomycota(100);c         | Leotiomycetes(100);o                   | Helotiales(100);f                         | Sclerotiniaceae(100);g                         | Valdensinia(100);s                      | Valdensinia heterodoxa(100);                  |
| Otu01856 | unknown(100);unclassified(100);unclassified(100);unclassified(100);unclassified(100);unclassified(100); |              |                           |                                        |                                           |                                                |                                         |                                               |
| Otu01857 | k                                                                                                       | Fungi(100);p | Basidiomycota(100);c      | Agaricomycetes(100);o                  | Auriculariales(100);f                     | Auriculariales_family_Incertae_sedis(100);g    | Basidiodendron(100);s                   | Basidiodendron caesiocinereum(100);           |
| Otu01858 | k                                                                                                       | Fungi(100);p | Basidiomycota(100);c      | Agaricomycetes(100);o                  | Agaricales(100);f                         | Cortinariaceae(100);g                          | Cortinarius(100);s                      | Cortinarius neofurvolaeus(100);               |
| Otu01859 | k                                                                                                       | Fungi(100);p | Basidiomycota(100);c      | Agaricomycetes(100);o                  | Agaricales(100);f                         | Pleurotaceae(100);g                            | unclassified Pleurotaceae(100);s        | Pleurotaceae_sp(100);                         |
| Otu01862 | k                                                                                                       | Fungi(100);p | Basidiomycota(100);c      | Agaricomycetes(100);o                  | Agaricales(100);f                         | Marasmiaceae(100);g                            | unclassified Marasmiaceae(100);s        | Marasmiaceae_sp(100);                         |
| Otu01863 | k                                                                                                       | Fungi(100);p | Ascomycota(100);c         | Eurotiomycetes(100);o                  | Chaetothiales(100);f                      | Herpotrichiellaceae(100);g                     | Cladophialophora(100);s                 | Cladophialophora_TRN488(100);                 |
| Otu01864 | k                                                                                                       | Fungi(100);p | Basidiomycota(100);c      | unclassified Basidiomycota(100);o      | unclassified Basidiomycota(100);f         | unclassified Basidiomycota(100);g              | unclassified Basidiomycota(100);s       | Basidiomycota_sp(100);                        |
| Otu01865 | k                                                                                                       | Fungi(100);p | Ascomycota(100);c         | Leotiomycetes(100);o                   | Helotiales(100);f                         | Helotiales_family_Incertae_sedis(100);g        | Cadophora(100);s                        | Cadophora finlandica(100);                    |
| Otu01866 | k                                                                                                       | Fungi(100);p | Basidiomycota(100);c      | Agaricomycetes(100);o                  | Russulales(100);f                         | Russulaceae(100);g                             | Russula(100);s                          | Russula puellaris(100);                       |
| Otu01867 | k                                                                                                       | Fungi(100);p | Basidiomycota(100);c      | Tremellomycetes(100);o                 | Trichosporonales(100);f                   | Trichosporonaceae(100);g                       | Trichosporon(100);s                     | Trichosporon_middelhovenii(100);              |
| Otu01868 | k                                                                                                       | Fungi(100);p | Ascomycota(100);c         | Leotiomycetes(100);o                   | Leotiomycetes_order_Incertae_sedis(100);f | Leotiomycetes_family_Incertae_sedis(100);g     | Meliniomyces(100);s                     | Meliniomyces_sp(100);                         |
| Otu01869 | k                                                                                                       | Fungi(100);p | Basidiomycota(100);c      | Agaricomycetes(100);o                  | Agaricales(100);f                         | Strophariaceae(100);g                          | Galerina(100);s                         | Galerina sphagnorum(100);                     |
| Otu01871 | k                                                                                                       | Fungi(100);p | Basidiomycota(100);c      | Agaricomycetes(100);o                  | Polyporales(100);f                        | Phanerochaetaeaceae(100);g                     | Phanerochaete(100);s                    | Phanerochaete_DL2011_1(100);                  |
| Otu01872 | unknown(100);unclassified(100);unclassified(100);unclassified(100);unclassified(100);unclassified(100); |              |                           |                                        |                                           |                                                |                                         |                                               |
| Otu01873 | k                                                                                                       | Fungi(100);p | Basidiomycota(100);c      | Agaricomycetes(100);o                  | Auriculariales(100);f                     | unclassified Auriculariales(100);g             | unclassified Auriculariales(100);s      | Auriculariales_sp(100);                       |
| Otu01875 | unknown(100);unclassified(100);unclassified(100);unclassified(100);unclassified(100);unclassified(100); |              |                           |                                        |                                           |                                                |                                         |                                               |
| Otu01876 | k                                                                                                       | Fungi(100);p | Basidiomycota(100);c      | Agaricomycetes(100);o                  | Agaricales(100);f                         | unclassified Agaricales(100);g                 | unclassified Agaricales(100);s          | Agaricales_sp(100);                           |
| Otu01878 | k                                                                                                       | Fungi(100);p | Zygomycota(100);c         | Zygomycota_class_Incertae_sedis(100);o | Mucorales(100);f                          | Cunninghamellaceae(100);g                      | Absidia(100);s                          | Absidia cylindrospora_var_cylindrospora(100); |
| Otu01879 | unknown(67);unclassified(67);unclassified(67);unclassified(67);unclassified(67);unclassified(67);       |              |                           |                                        |                                           |                                                |                                         |                                               |
| Otu01880 | k                                                                                                       | Fungi(100);p | Basidiomycota(100);c      | Agaricomycetes(100);o                  | Atheliales(100);f                         | Athelaceae(100);g                              | unclassified Athelaceae(67);s           | Athelaceae_sp(67);                            |
| Otu01882 | unknown(67);unclassified(67);unclassified(67);unclassified(67);unclassified(67);unclassified(67);       |              |                           |                                        |                                           |                                                |                                         |                                               |
| Otu01883 | k                                                                                                       | Fungi(100);p | Basidiomycota(100);c      | Agaricomycetes(100);o                  | Agaricales(100);f                         | Cortinariaceae(100);g                          | Cortinarius(100);s                      | Cortinarius_sp(100);                          |
| Otu01884 | k                                                                                                       | Fungi(100);p | Ascomycota(100);c         | unclassified Ascomycota(100);o         | unclassified Ascomycota(100);f            | unclassified Ascomycota(100);g                 | unclassified Ascomycota(100);s          | Ascomycota_sp(100);                           |
| Otu01886 | k                                                                                                       | Fungi(100);p | unclassified Fungi(100);c | unclassified Fungi(100);o              | unclassified Fungi(100);f                 | unclassified Fungi(100);g                      | unclassified Fungi(100);s               | Fungi_sp(100);                                |
| Otu01887 | k                                                                                                       | Fungi(100);p | Ascomycota(100);c         | Leotiomycetes(100);o                   | Helotiales(100);f                         | unclassified Helotiales(100);g                 | unclassified Helotiales(100);s          | Helotiales_sp(100);                           |
| Otu01888 | k                                                                                                       | Fungi(100);p | Ascomycota(100);c         | Dothideomycetes(100);o                 | unclassified Dothideomycetes(100);f       | unclassified Dothideomycetes(100);g            | unclassified Dothideomycetes(100);s     | Dothideomycetes_sp(100);                      |
| Otu01889 | k                                                                                                       | Fungi(100);p | Ascomycota(100);c         | Dothideomycetes(100);o                 | Pleosporales(100);f                       | unclassified Pleosporales(100);g               | unclassified Pleosporales(100);s        | Pleosporales_sp(100);                         |
| Otu01890 | unknown(100);unclassified(100);unclassified(100);unclassified(100);unclassified(100);unclassified(100); |              |                           |                                        |                                           |                                                |                                         |                                               |
| Otu01892 | k                                                                                                       | Fungi(100);p | Ascomycota(100);c         | Dothideomycetes(100);o                 | Capnodiales(100);f                        | Mycosphaerellaceae(100);g                      | Cercospora(100);s                       | Cercospora zeina(100);                        |
| Otu01894 | k                                                                                                       | Fungi(100);p | Basidiomycota(100);c      | Tremellomycetes(67);o                  | Tremellales(67);f                         | unclassified Tremellales(67);g                 | unclassified Tremellales(67);s          | Tremellales_sp(67);                           |
| Otu01895 | k                                                                                                       | Fungi(100);p | Basidiomycota(100);c      | Agaricomycetes(100);o                  | Hymenochaetales(100);f                    | Hymenochaetaeaceae(100);g                      | Tubulicrinis(100);s                     | Tubulicrinis_sp(100);                         |
| Otu01896 | k                                                                                                       | Fungi(100);p | Rozellomycota(100);c      | unclassified Rozellomycota(100);o      | unclassified Rozellomycota(100);f         | unclassified Rozellomycota(100);g              | unclassified Rozellomycota(100);s       | Rozellomycota_sp(100);                        |
| Otu01897 | k                                                                                                       | Fungi(100);p | Ascomycota(100);c         | Lecanoromycetes(100);o                 | unclassified Lecanoromycetes(100);f       | unclassified Lecanoromycetes(100);g            | unclassified Lecanoromycetes(100);s     | Lecanoromycetes_sp(100);                      |
| Otu01898 | unknown(100);unclassified(100);unclassified(100);unclassified(100);unclassified(100);unclassified(100); |              |                           |                                        |                                           |                                                |                                         |                                               |
| Otu01899 | k                                                                                                       | Fungi(100);p | Zygomycota(100);c         | Zygomycota_class_Incertae_sedis(100);o | Mucorales(100);f                          | Mucoraceae(100);g                              | Mucor(100);s                            | Mucor_sp(100);                                |
| Otu01900 | k                                                                                                       | Fungi(100);p | Ascomycota(100);c         | Leotiomycetes(100);o                   | Helotiales(100);f                         | unclassified Helotiales(100);g                 | unclassified Helotiales(100);s          | Helotiales_sp(100);                           |
| Otu01901 | k                                                                                                       | Fungi(100);p | unclassified Fungi(100);c | unclassified Fungi(100);o              | unclassified Fungi(100);f                 | unclassified Fungi(100);g                      | unclassified Fungi(100);s               | Fungi_sp(100);                                |
| Otu01902 | k                                                                                                       | Fungi(100);p | Ascomycota(100);c         | Leotiomycetes(100);o                   | Helotiales(100);f                         | Helotiaceae(100);g                             | unclassified Helotiaceae(100);s         | Helotiaceae_sp(100);                          |
| Otu01903 | unknown(100);unclassified(100);unclassified(100);unclassified(100);unclassified(100);unclassified(100); |              |                           |                                        |                                           |                                                |                                         |                                               |
| Otu01904 | k                                                                                                       | Fungi(100);p | Ascomycota(100);c         | Leotiomycetes(100);o                   | unclassified Leotiomycetes(100);f         | unclassified Leotiomycetes(100);g              | unclassified Leotiomycetes(100);s       | Leotiomycetes_sp(100);                        |
| Otu01905 | k                                                                                                       | Fungi(100);p | Ascomycota(100);c         | Leotiomycetes(100);o                   | Helotiales(100);f                         | Helotiales_family_Incertae_sedis(100);g        | Cadophora(100);s                        | Cadophora_sp(100);                            |
| Otu01906 | unknown(100);unclassified(100);unclassified(100);unclassified(100);unclassified(100);unclassified(100); |              |                           |                                        |                                           |                                                |                                         |                                               |
| Otu01907 | k                                                                                                       | Fungi(100);p | Ascomycota(100);c         | Pezizomycetes(100);o                   | Pezizales(100);f                          | Pyronemataceae(100);g                          | Wilcoxina(100);s                        | Wilcoxina rehmi(100);                         |
| Otu01908 | k                                                                                                       | Fungi(100);p | Ascomycota(67);c          | unclassified Ascomycota(67);o          | unclassified Ascomycota(67);f             | unclassified Ascomycota(67);g                  | unclassified Ascomycota(67);s           | Ascomycota_sp(67);                            |

Supplementary, TableS1A  
 Taxonomy of OTUs  
 Normalized data, identification according to blast UNITEvs7

|          |                                                                                                                           |                                                                                                                         |                           |                                                                                              |                                             |                                             |                                         |                                             |
|----------|---------------------------------------------------------------------------------------------------------------------------|-------------------------------------------------------------------------------------------------------------------------|---------------------------|----------------------------------------------------------------------------------------------|---------------------------------------------|---------------------------------------------|-----------------------------------------|---------------------------------------------|
| Otu01909 | k                                                                                                                         | Fungi(100);p                                                                                                            | Basidiomycota(100);c      | Agaricomycetes(100);o                                                                        | Agaricales(100);f                           | Clavariaceae(100);g                         | unclassified Clavariaceae(100);s        | Clavariaceae sp(100);                       |
| Otu01910 | unknown(100);unclassified(100);unclassified(100);unclassified(100);unclassified(100);unclassified(100);unclassified(100); |                                                                                                                         |                           |                                                                                              |                                             |                                             |                                         |                                             |
| Otu01911 | k                                                                                                                         | Fungi(100);p                                                                                                            | Ascomycota(100);c         | Leotiomycetes(100);o                                                                         | Leotiomycetes_order_Incertae_sedis(100);f   | Leotiomycetes_family_Incertae_sedis(100);g  | Meliniumycetes(100);s                   | Meliniumycetes_bicolor(100);                |
| Otu01912 | k                                                                                                                         | Fungi(100);p                                                                                                            | Basidiomycota(100);c      | Agaricomycetes(100);o                                                                        | Cantharellales(100);f                       | Hydnaceae(100);g                            | Sistotrema(100);s                       | Sistotrema_sp(100);                         |
| Otu01913 | unknown(100);unclassified(100);unclassified(100);unclassified(100);unclassified(100);unclassified(100);                   |                                                                                                                         |                           |                                                                                              |                                             |                                             |                                         |                                             |
| Otu01914 | k                                                                                                                         | Fungi(100);p                                                                                                            | Basidiomycota(100);c      | Tremellomycetes(100);o                                                                       | Tremellales(100);f                          | Tremellales_family_Incertae_sedis(100);g    | Dioszegia(100);s                        | Dioszegia_sp_YM24626(100);                  |
| Otu01915 | k                                                                                                                         | Fungi(100);p                                                                                                            | Ascomycota(100);c         | Eurotiomycetes(100);o                                                                        | Eurotiales(100);f                           | Elaphomyetaceae(100);g                      | Elaphomyces(100);s                      | Elaphomyces_sp_GM_13_32(100);               |
| Otu01916 | k                                                                                                                         | Fungi(100);p                                                                                                            | Basidiomycota(100);c      | Agaricomycetes(100);o                                                                        | Telephorales(100);f                         | Telephoraceae(100);g                        | Tomentella(100);s                       | Tomentella_subilacina(100);                 |
| Otu01917 | k                                                                                                                         | Fungi(100);p                                                                                                            | Ascomycota(100);c         | Leotiomycetes(100);o                                                                         | Helotiales(100);f                           | Helotiales_family_Incertae_sedis(100);g     | Catenulifera(100);s                     | Catenulifera_sp(100);                       |
| Otu01918 | k                                                                                                                         | Fungi(100);p                                                                                                            | Basidiomycota(100);c      | Agaricomycetes(100);o                                                                        | Telephorales(100);f                         | Telephoraceae(100);g                        | unclassified Telephoraceae(67);s        | Telephoraceae_sp(67);                       |
| Otu01919 | k                                                                                                                         | Fungi(100);p                                                                                                            | Ascomycota(100);c         | Leotiomycetes(100);o                                                                         | Helotiales(100);f                           | Helotiales_family_Incertae_sedis(100);g     | Hyphodiscus(100);s                      | Hyphodiscus_sp_TU_104241(100);              |
| Otu01920 | k                                                                                                                         | Fungi(100);p                                                                                                            | Basidiomycota(100);c      | Exobasidiomycetes(100);o                                                                     | Exobasidiales(100);f                        | unclassified Exobasidiales(100);g           | unclassified Exobasidiales(100);s       | Exobasidiales_sp(100);                      |
| Otu01921 | k                                                                                                                         | Fungi(100);p                                                                                                            | Ascomycota(100);c         | Leotiomycetes(100);o                                                                         | Helotiales(100);f                           | unclassified Helotiales(100);g              | unclassified Helotiales(100);s          | Helotiales_sp(100);                         |
| Otu01922 | k                                                                                                                         | Fungi(100);p                                                                                                            | Ascomycota(100);c         | Dothideomycetes(100);o                                                                       | Dothideomycetes_order_Incertae_sedis(100);f | Pseudeurotiaceae(100);g                     | unclassified Pseudeurotiaceae(100);s    | Pseudeurotiaceae_sp(100);                   |
| Otu01923 | k                                                                                                                         | Fungi(100);p                                                                                                            | Basidiomycota(100);c      | Agaricomycetes(100);o                                                                        | Sebacinales(100);f                          | Sebacinaceae(100);g                         | unclassified Sebacinaceae(100);s        | Sebacinaceae_sp(100);                       |
| Otu01924 | k                                                                                                                         | Fungi(100);p                                                                                                            | Basidiomycota(100);c      | Agaricomycetes(100);o                                                                        | Russulales(100);f                           | Russulaceae(100);g                          | Lactarius(100);s                        | Lactarius_musteus(100);                     |
| Otu01926 | unknown(100);unclassified(100);unclassified(100);unclassified(100);unclassified(100);unclassified(100);                   |                                                                                                                         |                           |                                                                                              |                                             |                                             |                                         |                                             |
| Otu01928 | unknown(100);unclassified(100);unclassified(100);unclassified(100);unclassified(100);unclassified(100);unclassified(100); |                                                                                                                         |                           |                                                                                              |                                             |                                             |                                         |                                             |
| Otu01929 | k                                                                                                                         | Fungi(100);p                                                                                                            | Basidiomycota(100);c      | Tremellomycetes(100);o                                                                       | unclassified Tremellomycetes(100);f         | unclassified Tremellomycetes(100);g         | unclassified Tremellomycetes(100);s     | Tremellomycetes_sp(100);                    |
| Otu01931 | k                                                                                                                         | Fungi(100);p                                                                                                            | Ascomycota(100);c         | Dothideomycetes(100);o                                                                       | Venturiales(100);f                          | Venturiaceae(100);g                         | unclassified Venturiaceae(100);s        | Venturiaceae_sp(100);                       |
| Otu01932 | k                                                                                                                         | Fungi(100);p                                                                                                            | Ascomycota(100);c         | Dothideomycetes(100);o                                                                       | Dothideomycetes(100);f                      | unclassified Dothideomycetes(100);g         | unclassified Dothideomycetes(100);s     | Dothideomycetes_sp(100);                    |
| Otu01934 | k                                                                                                                         | Fungi(100);p                                                                                                            | Ascomycota(100);c         | Dothideomycetes(100);o                                                                       | Botryosphaerales(67);f                      | Botryosphaeriaceae(67);g                    | Pseudofusicoccum(67);s                  | Pseudofusicoccum_stromaticum(67);           |
| Otu01935 | unknown(100);unclassified(100);unclassified(100);unclassified(100);unclassified(100);unclassified(100);                   |                                                                                                                         |                           |                                                                                              |                                             |                                             |                                         |                                             |
| Otu01937 | k                                                                                                                         | Fungi(100);p                                                                                                            | Ascomycota(100);c         | Leotiomycetes(100);o                                                                         | Helotiales(100);f                           | Vibrissaceae(100);g                         | Acephala(100);s                         | Acephala_sp_1(100);                         |
| Otu01938 | k                                                                                                                         | Fungi(100);p                                                                                                            | Ascomycota(100);c         | Ascomycota_class_Incertae_sedis(100);o                                                       | Ascomycota_order_Incertae_sedis(100);f      | Ascomycota_family_Incertae_sedis(100);g     | Triscelophorus(100);s                   | Triscelophorus_cf_acinuatus_UMB_55810(100); |
| Otu01939 | k                                                                                                                         | Fungi(100);p                                                                                                            | Ascomycota(100);c         | Eurotiomycetes(100);o                                                                        | Chaetothyriales(100);f                      | Herpotrichiellaceae(100);g                  | unclassified Herpotrichiellaceae(100);s | Herpotrichiellaceae_sp(100);                |
| Otu01940 | k                                                                                                                         | Fungi(100);p                                                                                                            | Basidiomycota(100);c      | Agaricomycetes(100);o                                                                        | Gomphales(100);f                            | Gomphaceae(100);g                           | Gautieria(100);s                        | Gautieria_sp_Dinke2230CA(67);               |
| Otu01942 | k                                                                                                                         | Fungi(100);p                                                                                                            | Ascomycota(100);c         | Sordariomycetes(100);o                                                                       | Hypocreales(100);f                          | Hypocreaceae(100);g                         | Hypocrea(100);s                         | Hypocrea_crystalligena(100);                |
| Otu01944 | k                                                                                                                         | Fungi(100);p                                                                                                            | Ascomycota(100);c         | unclassified Ascomycota(100);o                                                               | unclassified Ascomycota(100);f              | unclassified Ascomycota(100);g              | unclassified Ascomycota(100);s          | Ascomycota_sp(100);                         |
| Otu01945 | k                                                                                                                         | Fungi(100);p                                                                                                            | unclassified Fungi(100);c | unclassified Fungi(100);o                                                                    | unclassified Fungi(100);f                   | unclassified Fungi(100);g                   | unclassified Fungi(100);s               | Fungi_sp(100);                              |
| Otu01946 | k                                                                                                                         | Fungi(67);p                                                                                                             | Basidiomycota(67);c       | Agaricomycetes(67);o                                                                         | Hymenochaetales(67);f                       | Hymenochaetales(67);g                       | Tubulicrinis(67);s                      | Tubulicrinis_sp(67);                        |
| Otu01947 | k                                                                                                                         | Fungi(100);p                                                                                                            | Basidiomycota(100);c      | Agaricomycetes(100);o                                                                        | Agaricales(100);f                           | Tricholomataceae(100);g                     | Tricholoma(100);s                       | Tricholoma_virgatum(100);                   |
| Otu01948 | unknown(100);unclassified(100);unclassified(100);unclassified(100);unclassified(100);unclassified(100);                   |                                                                                                                         |                           |                                                                                              |                                             |                                             |                                         |                                             |
| Otu01949 | unknown(100);unclassified(100);unclassified(100);unclassified(100);unclassified(100);unclassified(100);                   |                                                                                                                         |                           |                                                                                              |                                             |                                             |                                         |                                             |
| Otu01950 | k                                                                                                                         | Fungi(100);p                                                                                                            | Ascomycota(100);c         | Ascomycota_class_Incertae_sedis(100);o                                                       | Ascomycota_order_Incertae_sedis(100);f      | Ascomycota_family_Incertae_sedis(100);g     | Miniancora(100);s                       | Miniancora_allisoniensis(100);              |
| Otu01952 | k                                                                                                                         | Fungi(100);p                                                                                                            | Ascomycota(100);c         | Leotiomycetes(100);o                                                                         | Helotiales(100);f                           | Helotiales_family_Incertae_sedis(100);g     | Hyphodiscus(100);s                      | Hyphodiscus_hymeniophilus(100);             |
| Otu01953 | unknown(67);unclassified(67);unclassified(67);unclassified(67);unclassified(67);unclassified(67);                         |                                                                                                                         |                           |                                                                                              |                                             |                                             |                                         |                                             |
| Otu01954 | k                                                                                                                         | Fungi(100);p                                                                                                            | Ascomycota(100);c         | Dothideomycetes(100);o                                                                       | Pleosporales(100);f                         | unclassified Pleosporales(100);g            | unclassified Pleosporales(100);s        | Pleosporales_sp(100);                       |
| Otu01955 | k                                                                                                                         | Fungi(100);p                                                                                                            | Ascomycota(100);c         | Pezizomycetes(100);o                                                                         | Pezizales(100);f                            | Discinaceae(100);g                          | Gyromitra(100);s                        | Gyromitra_esculenta(100);                   |
| Otu01956 | k                                                                                                                         | Fungi(100);p                                                                                                            | Ascomycota(100);c         | Leotiomycetes(100);o                                                                         | Helotiales(100);f                           | unclassified Helotiales(100);g              | unclassified Helotiales(100);s          | Helotiales_sp(100);                         |
| Otu01957 | unknown(100);unclassified(100);unclassified(100);unclassified(100);unclassified(100);unclassified(100);                   |                                                                                                                         |                           |                                                                                              |                                             |                                             |                                         |                                             |
| Otu01958 | k                                                                                                                         | Fungi(100);p                                                                                                            | Basidiomycota(100);c      | Agaricomycetes(100);o                                                                        | Hymenochaetales(100);f                      | Schizopora(100);g                           | Xylodon(100);s                          | Xylodon_sambuci(100);                       |
| Otu01959 | unknown(100);unclassified(100);unclassified(100);unclassified(100);unclassified(100);unclassified(100);                   |                                                                                                                         |                           |                                                                                              |                                             |                                             |                                         |                                             |
| Otu01960 | k                                                                                                                         | Fungi(100);p                                                                                                            | Ascomycota(100);c         | Sordariomycetes(100);o                                                                       | Sordariales(100);f                          | Lasiosphaeriaceae(100);g                    | Podospora(100);s                        | Podospora_sp(100);                          |
| Otu01962 | k                                                                                                                         | Fungi(100);p                                                                                                            | Ascomycota(100);c         | Pezizomycetes(100);o                                                                         | Pezizales(100);f                            | Chorioactidaceae(100);g                     | Desmazierella(100);s                    | Desmazierella_sp_OK_2014(100);              |
| Otu01966 | k                                                                                                                         | Fungi(100);p                                                                                                            | Ascomycota(100);c         | Leotiomycetes(100);o                                                                         | Leotiales(100);f                            | Leotiaceae(100);g                           | Alatospora(100);s                       | Alatospora_flagellata(100);                 |
| Otu01967 | unknown(100);unclassified(100);unclassified(100);unclassified(100);unclassified(100);unclassified(100);                   |                                                                                                                         |                           |                                                                                              |                                             |                                             |                                         |                                             |
| Otu01968 | k                                                                                                                         | Fungi(100);p                                                                                                            | Ascomycota(100);c         | Saccharomycetes(100);o                                                                       | Saccharomycetales(100);f                    | Debaryomycetaceae(100);g                    | Scheffersomyces(100);s                  | Scheffersomyces_shehatae(100);              |
| Otu01969 | k                                                                                                                         | Fungi(100);p                                                                                                            | Chytridiomycota(100);c    | Chytridiomycetes(100);o                                                                      | Rhizophydiales(100);f                       | Rhizophydiales_family_Incertae_sedis(100);g | Operculomyces(100);s                    | Operculomyces_laminatus(100);               |
| Otu01970 | k                                                                                                                         | Fungi(100);p                                                                                                            | Rozellomycota(100);c      | unclassified Rozellomycota(100);o                                                            | unclassified Rozellomycota(100);f           | unclassified Rozellomycota(100);g           | unclassified Rozellomycota(100);s       | Rozellomycota_sp(100);                      |
| Otu01971 | k                                                                                                                         | Fungi(100);p                                                                                                            | Basidiomycota(100);c      | Agaricomycetes(100);unclassified(100);unclassified(100);unclassified(100);unclassified(100); |                                             |                                             |                                         |                                             |
| Otu01973 | unknown(100);unclassified(100);unclassified(100);unclassified(100);unclassified(100);unclassified(100);                   |                                                                                                                         |                           |                                                                                              |                                             |                                             |                                         |                                             |
| Otu01974 | k                                                                                                                         | Fungi(100);p                                                                                                            | Basidiomycota(100);c      | Agaricomycetes(100);o                                                                        | Agaricales(100);f                           | Strophariaceae(100);g                       | Pholiota(100);s                         | Pholiota_sp_Di267_2(100);                   |
| Otu01975 | k                                                                                                                         | Fungi(100);p                                                                                                            | Ascomycota(100);c         | Dothideomycetes(100);o                                                                       | Botryosphaerales(100);f                     | Botryosphaeriaceae(100);g                   | Dothiorella(100);s                      | Dothiorella_sp(100);                        |
| Otu01977 | unknown(100);unclassified(100);unclassified(100);unclassified(100);unclassified(100);unclassified(100);                   |                                                                                                                         |                           |                                                                                              |                                             |                                             |                                         |                                             |
| Otu01978 | k                                                                                                                         | Fungi(100);p                                                                                                            | Ascomycota(100);c         | Leotiomycetes(100);o                                                                         | Helotiales(100);f                           | Hyaloscyphaceae(100);g                      | unclassified Hyaloscyphaceae(100);s     | Hyaloscyphaceae_sp(100);                    |
| Otu01979 | k                                                                                                                         | Fungi(100);p                                                                                                            | Basidiomycota(100);c      | Agaricomycetes(100);o                                                                        | Polyporales(100);f                          | Fomitopsidaceae(100);g                      | Anomoloma(100);s                        | Anomoloma_myceliosum(100);                  |
| Otu01980 | k                                                                                                                         | Fungi(100);unclassified(100);unclassified(100);unclassified(100);unclassified(100);unclassified(100);unclassified(100); |                           |                                                                                              |                                             |                                             |                                         |                                             |
| Otu01981 | unknown(100);unclassified(100);unclassified(100);unclassified(100);unclassified(100);unclassified(100);                   |                                                                                                                         |                           |                                                                                              |                                             |                                             |                                         |                                             |
| Otu01982 | k                                                                                                                         | Fungi(100);p                                                                                                            | Basidiomycota(100);c      | Tremellomycetes(100);o                                                                       | Tremellales(100);f                          | Tremellales_family_Incertae_sedis(100);g    | Kockovaella(100);s                      | Kockovaella_phaffii(100);                   |
| Otu01985 | k                                                                                                                         | Fungi(100);p                                                                                                            | Basidiomycota(100);c      | Agaricomycetes(100);o                                                                        | Trechisporales(100);f                       | Hydnodontaceae(100);g                       | unclassified Hydnodontaceae(100);s      | Hydnodontaceae_sp(100);                     |
| Otu01986 | k                                                                                                                         | Fungi(100);p                                                                                                            | Ascomycota(100);c         | Lecanoromycetes(100);o                                                                       | Ostropales(100);f                           | Stictidaceae(100);g                         | Cryptodiscus(100);s                     | Cryptodiscus_tabularum(100);                |
| Otu01987 | k                                                                                                                         | Fungi(100);p                                                                                                            | Ascomycota(100);c         | Leotiomycetes(100);o                                                                         | Helotiales(100);f                           | Helotiaceae(100);g                          | Neobulgaria(100);s                      | Neobulgaria_sp_6743_R2(100);                |
| Otu01988 | unclassified(100);unclassified(100);unclassified(100);unclassified(100);unclassified(100);unclassified(100);              |                                                                                                                         |                           |                                                                                              |                                             |                                             |                                         |                                             |
| Otu01989 | unclassified(100);unclassified(100);unclassified(100);unclassified(100);unclassified(100);unclassified(100);              |                                                                                                                         |                           |                                                                                              |                                             |                                             |                                         |                                             |
| Otu01990 | k                                                                                                                         | Fungi(100);p                                                                                                            | Ascomycota(100);c         | Eurotiomycetes(100);o                                                                        | Verrucariales(100);f                        | Verrucariaceae(100);g                       | Dermatocarpon(100);s                    | Dermatocarpon_luridum_var_luridum(100);     |

Supplementary, TableS1A  
 Taxonomy of OTUs  
 Normalized data, identification according to blast UNITEv7

|          |                                                                                                                                |              |                           |                                        |                                             |                                              |                                      |                                       |
|----------|--------------------------------------------------------------------------------------------------------------------------------|--------------|---------------------------|----------------------------------------|---------------------------------------------|----------------------------------------------|--------------------------------------|---------------------------------------|
| Otu01991 | k                                                                                                                              | Fungi(100);p | unclassified Fungi(100);c | unclassified Fungi(100);o              | unclassified Fungi(100);f                   | unclassified Fungi(100);g                    | unclassified Fungi(100);s            | Fungi_sp(100);                        |
| Otu01993 | unknown(100);unclassified(100);unclassified(100);unclassified(100);unclassified(100);unclassified(100);unclassified(100);      |              |                           |                                        |                                             |                                              |                                      |                                       |
| Otu01994 | k                                                                                                                              | Fungi(100);p | Ascomycota(100);c         | Lecanoromycetes(100);o                 | Lecanorales(100);f                          | Parmeliaceae(100);g                          | Hypogymnia(100);s                    | Hypogymnia_physodes(100);             |
| Otu01996 | unknown(100);unclassified(100);unclassified(100);unclassified(100);unclassified(100);unclassified(100);unclassified(100);      |              |                           |                                        |                                             |                                              |                                      |                                       |
| Otu01997 | k                                                                                                                              | Fungi(100);p | Ascomycota(100);c         | Saccharomycetes(100);o                 | Saccharomycetales(100);f                    | Dipodascaceae(100);g                         | Basidioascus(100);s                  | Basidioascus_magus(100);              |
| Otu01998 | k                                                                                                                              | Fungi(100);p | Basidiomycota(100);c      | Agaricomycetes(100);o                  | Agaricales(100);f                           | unclassified Agaricales(100);g               | unclassified Agaricales(100);s       | Agaricales_sp(100);                   |
| Otu01999 | k                                                                                                                              | Fungi(100);p | Basidiomycota(100);c      | Microbotryomycetes(100);o              | Sporidiobolales(100);f                      | Sporidiobolales family Incertae sedis(100);g | Rhodotorula(100);s                   | Rhodotorula_sp(100);                  |
| Otu02000 | k                                                                                                                              | Fungi(100);p | Basidiomycota(100);c      | Agaricomycetes(100);o                  | Hymenochaetales(100);f                      | Hymenochaetales(100);g                       | Phellinus(100);s                     | Phellinus_chrysoloma(100);            |
| Otu02001 | k                                                                                                                              | Fungi(100);p | Ascomycota(100);c         | Leotiomyces(100);o                     | Helotiales(100);f                           | unclassified Helotiales(100);g               | unclassified Helotiales(100);s       | Helotiales_sp(100);                   |
| Otu02002 | k                                                                                                                              | Fungi(100);p | Ascomycota(100);c         | Lecanoromycetes(100);o                 | Pertusariales(100);f                        | Megasporaceae(100);g                         | unclassified Megasporaceae(100);s    | Megasporaceae_sp(100);                |
| Otu02003 | unknown(100);unclassified(100);unclassified(100);unclassified(100);unclassified(100);unclassified(100);unclassified(100);      |              |                           |                                        |                                             |                                              |                                      |                                       |
| Otu02004 | k                                                                                                                              | Fungi(100);p | Ascomycota(100);c         | Leotiomyces(100);o                     | Helotiales(100);f                           | unclassified Helotiales(100);g               | unclassified Helotiales(100);s       | Helotiales_sp(100);                   |
| Otu02005 | unclassified(100);unclassified(100);unclassified(100);unclassified(100);unclassified(100);unclassified(100);unclassified(100); |              |                           |                                        |                                             |                                              |                                      |                                       |
| Otu02006 | unknown(100);unclassified(100);unclassified(100);unclassified(100);unclassified(100);unclassified(100);unclassified(100);      |              |                           |                                        |                                             |                                              |                                      |                                       |
| Otu02007 | k                                                                                                                              | Fungi(100);p | Ascomycota(100);c         | Leotiomyces(100);o                     | Helotiales(100);f                           | unclassified Helotiales(100);g               | unclassified Helotiales(100);s       | Helotiales_sp(100);                   |
| Otu02008 | k                                                                                                                              | Fungi(100);p | Basidiomycota(100);c      | Tremellomycetes(100);o                 | Filobasidiales(100);f                       | Filobasidiales(100);g                        | Cryptococcus(100);s                  | Cryptococcus_albidus_var_ovalis(100); |
| Otu02009 | k                                                                                                                              | Fungi(100);p | Basidiomycota(100);c      | Agaricomycetes(100);o                  | Thelephorales(100);f                        | Thelephoraceae(100);g                        | Pseudotomentella(100);s              | Pseudotomentella_sp(100);             |
| Otu02010 | k                                                                                                                              | Fungi(100);p | Ascomycota(100);c         | Sordariomycetes(100);o                 | Microascales(100);f                         | Halosphaeriaceae(100);g                      | Clavatospora(100);s                  | Clavatospora_longibrachia(100);       |
| Otu02011 | unknown(100);unclassified(100);unclassified(100);unclassified(100);unclassified(100);unclassified(100);unclassified(100);      |              |                           |                                        |                                             |                                              |                                      |                                       |
| Otu02012 | k                                                                                                                              | Fungi(100);p | Basidiomycota(100);c      | Microbotryomycetes(100);o              | Sporidiobolales(100);f                      | Sporidiobolales family Incertae sedis(100);g | Rhodotorula(100);s                   | Rhodotorula_sp(100);                  |
| Otu02014 | k                                                                                                                              | Fungi(100);p | Basidiomycota(100);c      | Agaricomycetes(100);o                  | Polyporales(100);f                          | Meripilaceae(100);g                          | Hydnopolyporus(100);s                | Hydnopolyporus_fimbriatus(100);       |
| Otu02016 | k                                                                                                                              | Fungi(100);p | Basidiomycota(100);c      | Microbotryomycetes(100);o              | Sporidiobolales(100);f                      | Sporidiobolales family Incertae sedis(100);g | Sporobolomyces(100);s                | Sporobolomyces_lactophilus(100);      |
| Otu02017 | k                                                                                                                              | Fungi(100);p | Basidiomycota(100);c      | Microbotryomycetes(100);o              | Sporidiobolales(100);f                      | Sporidiobolales family Incertae sedis(100);g | Sporobolomyces(100);s                | Sporobolomyces_inosiphilus(100);      |
| Otu02019 | unknown(100);unclassified(100);unclassified(100);unclassified(100);unclassified(100);unclassified(100);unclassified(100);      |              |                           |                                        |                                             |                                              |                                      |                                       |
| Otu02020 | k                                                                                                                              | Fungi(100);p | Ascomycota(100);c         | Leotiomyces(100);o                     | Helotiales(100);f                           | Hyaloscyphaceae(100);g                       | Arachnopeziza(100);s                 | Arachnopeziza_aurata(100);            |
| Otu02021 | k                                                                                                                              | Fungi(100);p | Ascomycota(100);c         | Leotiomyces(100);o                     | Leotiomyces order Incertae sedis(100);f     | Leotiomyces family Incertae sedis(100);g     | Collophora(100);s                    | Collophora_sp(100);                   |
| Otu02022 | k                                                                                                                              | Fungi(100);p | Basidiomycota(100);c      | Microbotryomycetes(100);o              | Sporidiobolales(100);f                      | Sporidiobolales family Incertae sedis(100);g | Sporobolomyces(100);s                | Sporobolomyces_lactophilus(100);      |
| Otu02023 | unknown(100);unclassified(100);unclassified(100);unclassified(100);unclassified(100);unclassified(100);unclassified(100);      |              |                           |                                        |                                             |                                              |                                      |                                       |
| Otu02024 | k                                                                                                                              | Fungi(100);p | Basidiomycota(100);c      | Tremellomycetes(100);o                 | unclassified Tremellomycetes(100);f         | unclassified Tremellomycetes(100);g          | unclassified Tremellomycetes(100);s  | Tremellomycetes_sp(100);              |
| Otu02025 | k                                                                                                                              | Fungi(100);p | unclassified Fungi(100);c | unclassified Fungi(100);o              | unclassified Fungi(100);f                   | unclassified Fungi(100);g                    | unclassified Fungi(100);s            | Fungi_sp(100);                        |
| Otu02026 | k                                                                                                                              | Fungi(100);p | Ascomycota(100);c         | Dothideomycetes(100);o                 | Dothideomycetes order Incertae sedis(100);f | Pseudeurotiaceae(100);g                      | unclassified Pseudeurotiaceae(100);s | Pseudeurotiaceae_sp(100);             |
| Otu02027 | k                                                                                                                              | Fungi(100);p | Ascomycota(100);c         | unclassified(100);o                    | unclassified(100);f                         | unclassified(100);g                          | unclassified(100);s                  | unclassified(100);                    |
| Otu02028 | unclassified(100);unclassified(100);unclassified(100);unclassified(100);unclassified(100);unclassified(100);unclassified(100); |              |                           |                                        |                                             |                                              |                                      |                                       |
| Otu02030 | k                                                                                                                              | Fungi(100);p | Basidiomycota(100);c      | Agaricomycetes(100);o                  | Agaricales(100);f                           | Strophariaceae(100);g                        | Gymnopilus(100);s                    | Gymnopilus_penetrans(100);            |
| Otu02031 | k                                                                                                                              | Fungi(100);p | Ascomycota(100);c         | Leotiomyces(100);o                     | Helotiales(100);f                           | unclassified Helotiales(100);g               | unclassified Helotiales(100);s       | Helotiales_sp(100);                   |
| Otu02032 | k                                                                                                                              | Fungi(100);p | unclassified Fungi(100);c | unclassified Fungi(100);o              | unclassified Fungi(100);f                   | unclassified Fungi(100);g                    | unclassified Fungi(100);s            | Fungi_sp(100);                        |
| Otu02034 | k                                                                                                                              | Fungi(100);p | Ascomycota(100);c         | Eurotiomycetes(100);o                  | Eurotiales(100);f                           | Trichocomaceae(100);g                        | Sagenomella(100);s                   | Sagenomella_griseoviridis(100);       |
| Otu02036 | unknown(100);unclassified(100);unclassified(100);unclassified(100);unclassified(100);unclassified(100);unclassified(100);      |              |                           |                                        |                                             |                                              |                                      |                                       |
| Otu02037 | k                                                                                                                              | Fungi(100);p | unclassified(100);c       | unclassified(100);o                    | unclassified(100);f                         | unclassified(100);g                          | unclassified(100);s                  | unclassified(100);                    |
| Otu02038 | unknown(100);unclassified(100);unclassified(100);unclassified(100);unclassified(100);unclassified(100);unclassified(100);      |              |                           |                                        |                                             |                                              |                                      |                                       |
| Otu02039 | k                                                                                                                              | Fungi(100);p | Ascomycota(100);c         | Sordariomycetes(100);o                 | Sordariales(100);f                          | Sordariaceae(100);g                          | Sordaria(100);s                      | Sordaria_sp_SS_1479(100);             |
| Otu02040 | k                                                                                                                              | Fungi(100);p | Basidiomycota(100);c      | Pucciniomycetes(100);o                 | Pucciniales(100);f                          | Pucciniaceae(100);g                          | Gymnosporangium(100);s               | Gymnosporangium_globosum(100);        |
| Otu02041 | k                                                                                                                              | Fungi(100);p | Basidiomycota(100);c      | Agaricomycetes(100);o                  | Trechisporales(100);f                       | Hydnodontaceae(100);g                        | Trechispora(100);s                   | Trechispora(100);                     |
| Otu02043 | k                                                                                                                              | Fungi(100);p | Zygomycota(100);c         | Zygomycota class Incertae sedis(100);o | Mortierellales(100);f                       | Mortierellaceae(100);g                       | Mortierella(100);s                   | Mortierella_sp(100);                  |
| Otu02044 | k                                                                                                                              | Fungi(100);p | Ascomycota(100);c         | Ascomycota class Incertae sedis(100);o | Ascomycota order Incertae sedis(100);f      | Ascomycota family Incertae sedis(100);g      | Xenochalara(100);s                   | Xenochalara_sp(100);                  |
| Otu02046 | unknown(100);unclassified(100);unclassified(100);unclassified(100);unclassified(100);unclassified(100);unclassified(100);      |              |                           |                                        |                                             |                                              |                                      |                                       |
| Otu02047 | k                                                                                                                              | Fungi(100);p | Basidiomycota(100);c      | Agaricomycetes(100);o                  | Atheliales(100);f                           | Atheliaceae(100);g                           | Amphinema(100);s                     | Amphinema_sp(100);                    |
| Otu02049 | k                                                                                                                              | Fungi(100);p | Ascomycota(100);c         | Sordariomycetes(100);o                 | unclassified Sordariomycetes(100);f         | unclassified Sordariomycetes(100);g          | unclassified Sordariomycetes(100);s  | Sordariomycetes_sp(100);              |
| Otu02052 | unknown(100);unclassified(100);unclassified(100);unclassified(100);unclassified(100);unclassified(100);unclassified(100);      |              |                           |                                        |                                             |                                              |                                      |                                       |
| Otu02053 | k                                                                                                                              | Fungi(100);p | Basidiomycota(100);c      | Agaricomycetes(100);o                  | Agaricales(100);f                           | Physalacriaceae(100);g                       | Armillaria(100);s                    | Armillaria_sp_Arg281(100);            |
| Otu02054 | unknown(100);unclassified(100);unclassified(100);unclassified(100);unclassified(100);unclassified(100);unclassified(100);      |              |                           |                                        |                                             |                                              |                                      |                                       |
| Otu02055 | k                                                                                                                              | Fungi(100);p | Ascomycota(100);c         | Saccharomycetes(100);o                 | Saccharomycetales(100);f                    | Saccharomycetales(100);g                     | Vanderwaltozyma(100);s               | Vanderwaltozyma_sp_LCF_03(100);       |
| Otu02057 | k                                                                                                                              | Fungi(100);p | Glomeromycota(100);c      | Glomeromycetes(100);o                  | Diversisporales(100);f                      | Diversisporaceae(100);g                      | Diversispora(100);s                  | Diversispora_celata(100);             |
| Otu02058 | k                                                                                                                              | Fungi(100);p | Ascomycota(100);c         | Lecanoromycetes(100);o                 | Peltigerales(100);f                         | Lobariaceae(100);g                           | Lobaria(100);s                       | Lobaria_macaronesia(100);             |
| Otu02060 | unknown(100);unclassified(100);unclassified(100);unclassified(100);unclassified(100);unclassified(100);unclassified(100);      |              |                           |                                        |                                             |                                              |                                      |                                       |
| Otu02063 | unknown(100);unclassified(100);unclassified(100);unclassified(100);unclassified(100);unclassified(100);unclassified(100);      |              |                           |                                        |                                             |                                              |                                      |                                       |
| Otu02064 | unclassified(100);unclassified(100);unclassified(100);unclassified(100);unclassified(100);unclassified(100);unclassified(100); |              |                           |                                        |                                             |                                              |                                      |                                       |
| Otu02065 | unknown(100);unclassified(100);unclassified(100);unclassified(100);unclassified(100);unclassified(100);unclassified(100);      |              |                           |                                        |                                             |                                              |                                      |                                       |
| Otu02066 | k                                                                                                                              | Fungi(100);p | Rozellomycota(100);c      | unclassified Rozellomycota(100);o      | unclassified Rozellomycota(100);f           | unclassified Rozellomycota(100);g            | unclassified Rozellomycota(100);s    | Rozellomycota_sp(100);                |
| Otu02068 | k                                                                                                                              | Fungi(100);p | Ascomycota(100);c         | Eurotiomycetes(100);o                  | Chaetothyriales(100);f                      | unclassified Chaetothyriales(100);g          | unclassified Chaetothyriales(100);s  | Chaetothyriales_sp(100);              |
| Otu02069 | unknown(100);unclassified(100);unclassified(100);unclassified(100);unclassified(100);unclassified(100);unclassified(100);      |              |                           |                                        |                                             |                                              |                                      |                                       |
| Otu02070 | unknown(100);unclassified(100);unclassified(100);unclassified(100);unclassified(100);unclassified(100);unclassified(100);      |              |                           |                                        |                                             |                                              |                                      |                                       |
| Otu02071 | k                                                                                                                              | Fungi(100);p | Rozellomycota(100);c      | unclassified Rozellomycota(100);o      | unclassified Rozellomycota(100);f           | unclassified Rozellomycota(100);g            | unclassified Rozellomycota(100);s    | Rozellomycota_sp(100);                |
| Otu02073 | unknown(100);unclassified(100);unclassified(100);unclassified(100);unclassified(100);unclassified(100);unclassified(100);      |              |                           |                                        |                                             |                                              |                                      |                                       |
| Otu02074 | k                                                                                                                              | Fungi(100);p | Basidiomycota(100);c      | Agaricomycetes(100);o                  | Russulales(100);f                           | Russulaceae(100);g                           | Lactarius(100);s                     | Lactarius_rufus(100);                 |
| Otu02075 | unknown(100);unclassified(100);unclassified(100);unclassified(100);unclassified(100);unclassified(100);unclassified(100);      |              |                           |                                        |                                             |                                              |                                      |                                       |

Supplementary, TableS1A  
 Taxonomy of OTUs  
 Normalized data, identification according to blast UNITEv57

|          |                                                                                                                           |              |                           |                                                                                              |                                                                        |                                                |                                          |                                                |
|----------|---------------------------------------------------------------------------------------------------------------------------|--------------|---------------------------|----------------------------------------------------------------------------------------------|------------------------------------------------------------------------|------------------------------------------------|------------------------------------------|------------------------------------------------|
| Otu02076 | k                                                                                                                         | Fungi(100);p | Ascomycota(100);c         | Saccharomycetes(100);o                                                                       | Saccharomycetales(100);f                                               | Trichomonasaceae(100);g                        | Sugiyamaella(100);s                      | Sugiyamaella novakii(100);                     |
| Otu02077 | k                                                                                                                         | Fungi(100);p | Ascomycota(100);c         | Saccharomycetes(100);o                                                                       | Saccharomycetales(100);f                                               | Saccharomycetales family Incertae sedis(100);g | Candida(100);s                           | Candida salmanticensis(100);                   |
| Otu02078 | unknown(100);unclassified(100);unclassified(100);unclassified(100);unclassified(100);unclassified(100);                   |              |                           |                                                                                              |                                                                        |                                                |                                          |                                                |
| Otu02079 | unknown(100);unclassified(100);unclassified(100);unclassified(100);unclassified(100);unclassified(100);unclassified(100); |              |                           |                                                                                              |                                                                        |                                                |                                          |                                                |
| Otu02082 | k                                                                                                                         | Fungi(100);p | Ascomycota(100);c         | Eurotiomycetes(100);o                                                                        | Eurotiales(100);f                                                      | Trichocomaceae(100);g                          | Penicillium(100);s                       | Penicillium melinii(100);                      |
| Otu02084 | k                                                                                                                         | Fungi(100);p | Basidiomycota(100);c      | Agaricomycetes(100);o                                                                        | Cantharellales(100);f                                                  | unclassified Cantharellales(100);g             | unclassified Cantharellales(100);s       | Cantharellales sp(100);                        |
| Otu02085 | unknown(100);unclassified(100);unclassified(100);unclassified(100);unclassified(100);unclassified(100);                   |              |                           |                                                                                              |                                                                        |                                                |                                          |                                                |
| Otu02086 | k                                                                                                                         | Fungi(100);p | Ascomycota(100);c         | Orbiliomycetes(100);o                                                                        | Orbiliales(100);f                                                      | Orbiliaceae(100);g                             | unclassified Orbiliaceae(100);s          | Orbiliaceae sp(100);                           |
| Otu02087 | k                                                                                                                         | Fungi(100);p | Basidiomycota(100);c      | Agaricomycetes(100);o                                                                        | Agaricales(100);f                                                      | Tricholomataceae(100);g                        | Tricholomopsis(100);s                    | Tricholomopsis rutilans(100);                  |
| Otu02088 | k                                                                                                                         | Fungi(100);p | Ascomycota(100);c         | Sordariomycetes(100);o                                                                       | Ophiostomatales(100);f                                                 | Ophiostomataceae(100);g                        | Ophiostoma(100);unclassified(100);       |                                                |
| Otu02089 | unknown(100);unclassified(100);unclassified(100);unclassified(100);unclassified(100);unclassified(100);                   |              |                           |                                                                                              |                                                                        |                                                |                                          |                                                |
| Otu02090 | unknown(100);unclassified(100);unclassified(100);unclassified(100);unclassified(100);unclassified(100);                   |              |                           |                                                                                              |                                                                        |                                                |                                          |                                                |
| Otu02091 | k                                                                                                                         | Fungi(100);p | Basidiomycota(100);c      | Agaricomycetes(100);o                                                                        | Agaricales(100);f                                                      | Pterulaceae(100);g                             | Aphanobasidium(100);s                    | Aphanobasidium pseudotsugae(100);              |
| Otu02093 | k                                                                                                                         | Fungi(100);p | Basidiomycota(100);c      | Agaricomycetes(100);o                                                                        | Agaricales(100);f                                                      | Tricholomataceae(100);g                        | Tricholoma(100);s                        | Tricholoma portentosum(100);                   |
| Otu02094 | unknown(100);unclassified(100);unclassified(100);unclassified(100);unclassified(100);unclassified(100);                   |              |                           |                                                                                              |                                                                        |                                                |                                          |                                                |
| Otu02095 | k                                                                                                                         | Fungi(100);p | Ascomycota(100);c         | Orbiliomycetes(100);o                                                                        | Orbiliales(100);f                                                      | Orbiliaceae(100);g                             | unclassified Orbiliaceae(100);s          | Orbiliaceae sp(100);                           |
| Otu02096 | unknown(100);unclassified(100);unclassified(100);unclassified(100);unclassified(100);unclassified(100);                   |              |                           |                                                                                              |                                                                        |                                                |                                          |                                                |
| Otu02097 | unclassified(100);unclassified(100);unclassified(100);unclassified(100);unclassified(100);unclassified(100);              |              |                           |                                                                                              |                                                                        |                                                |                                          |                                                |
| Otu02098 | k                                                                                                                         | Fungi(100);p | Basidiomycota(100);c      | Agaricomycetes(100);o                                                                        | Auriculariales(100);f                                                  | Auriculariales family Incertae sedis(100);g    | Basidioidendron(100);s                   | Basidioidendron caesiocinereum(100);           |
| Otu02100 | k                                                                                                                         | Fungi(100);p | Ascomycota(100);c         | Saccharomycetes(100);o                                                                       | Saccharomycetales(100);f                                               | Trichomonasaceae(100);g                        | Blastobotrys(100);s                      | Blastobotrys serpentis(100);                   |
| Otu02101 | unknown(100);unclassified(100);unclassified(100);unclassified(100);unclassified(100);unclassified(100);                   |              |                           |                                                                                              |                                                                        |                                                |                                          |                                                |
| Otu02103 | unclassified(100);unclassified(100);unclassified(100);unclassified(100);unclassified(100);unclassified(100);              |              |                           |                                                                                              |                                                                        |                                                |                                          |                                                |
| Otu02104 | k                                                                                                                         | Fungi(100);p | Ascomycota(100);c         | Leotiomycetes(100);o                                                                         | Helotiales(100);f                                                      | Helotiales family Incertae sedis(100);g        | Xenopolyscytalum(100);s                  | Xenopolyscytalum sp CCF 4160(100);             |
| Otu02106 | k                                                                                                                         | Fungi(100);p | Ascomycota(100);c         | Sordariomycetes(100);o                                                                       | Ophiostomatales(100);f                                                 | Ophiostomataceae(100);g                        | Ophiostoma(100);s                        | Ophiostoma minus(100);                         |
| Otu02107 | unknown(100);unclassified(100);unclassified(100);unclassified(100);unclassified(100);unclassified(100);                   |              |                           |                                                                                              |                                                                        |                                                |                                          |                                                |
| Otu02108 | k                                                                                                                         | Fungi(100);p | Ascomycota(100);c         | Dothideomycetes(100);o                                                                       | Dothideomycetes order Incertae sedis(100);f                            | Myxotrachaceae(100);g                          | Oidiodendron(100);s                      | Oidiodendron pilicola(100);                    |
| Otu02110 | k                                                                                                                         | Fungi(100);p | Zygomycota(100);c         | Zygomycota class Incertae sedis(100);o                                                       | Mortierellales(100);f                                                  | Mortierellaceae(100);g                         | Mortierella(100);s                       | Mortierella sp(100);                           |
| Otu02112 | k                                                                                                                         | Fungi(100);p | Rozellomycota(100);c      | unclassified Rozellomycota(100);o                                                            | unclassified Rozellomycota(100);f                                      | unclassified Rozellomycota(100);g              | unclassified Rozellomycota(100);s        | Rozellomycota sp(100);                         |
| Otu02113 | k                                                                                                                         | Fungi(100);p | Ascomycota(100);c         | Leotiomycetes(100);o                                                                         | Helotiales(100);f                                                      | Helotiaceae(100);g                             | unclassified Helotiaceae(100);s          | Helotiaceae sp(100);                           |
| Otu02114 | unknown(100);unclassified(100);unclassified(100);unclassified(100);unclassified(100);unclassified(100);                   |              |                           |                                                                                              |                                                                        |                                                |                                          |                                                |
| Otu02115 | k                                                                                                                         | Fungi(100);p | Ascomycota(100);c         | Ascomycota class Incertae sedis(100);o                                                       | Ascomycota family Incertae sedis(100);g                                | Phialea(100);s                                 | Phialea sp(100);                         |                                                |
| Otu02117 | k                                                                                                                         | Fungi(100);p | Ascomycota(100);c         | Leotiomycetes(100);o                                                                         | Helotiales(100);f                                                      | unclassified Helotiales(100);g                 | unclassified Helotiales(100);s           | Helotiales sp(100);                            |
| Otu02118 | k                                                                                                                         | Fungi(100);p | Ascomycota(100);c         | Saccharomycetes(100);o                                                                       | Saccharomycetales(100);f                                               | Dipodascaceae(100);g                           | Basidioascus(100);s                      | Basidioascus magus(100);                       |
| Otu02119 | unknown(100);unclassified(100);unclassified(100);unclassified(100);unclassified(100);unclassified(100);                   |              |                           |                                                                                              |                                                                        |                                                |                                          |                                                |
| Otu02120 | k                                                                                                                         | Fungi(100);p | Ascomycota(100);c         | Sordariomycetes(100);o                                                                       | Ophiostomatales(100);f                                                 | Ophiostomataceae(100);g                        | Raffaelea(100);s                         | Raffaelea quercivora(100);                     |
| Otu02123 | unknown(100);unclassified(100);unclassified(100);unclassified(100);unclassified(100);unclassified(100);                   |              |                           |                                                                                              |                                                                        |                                                |                                          |                                                |
| Otu02124 | unknown(100);unclassified(100);unclassified(100);unclassified(100);unclassified(100);unclassified(100);                   |              |                           |                                                                                              |                                                                        |                                                |                                          |                                                |
| Otu02126 | unknown(100);unclassified(100);unclassified(100);unclassified(100);unclassified(100);unclassified(100);                   |              |                           |                                                                                              |                                                                        |                                                |                                          |                                                |
| Otu02127 | k                                                                                                                         | Fungi(100);p | Rozellomycota(100);c      | unclassified Rozellomycota(100);o                                                            | unclassified Rozellomycota(100);f                                      | unclassified Rozellomycota(100);g              | unclassified Rozellomycota(100);s        | Rozellomycota sp(100);                         |
| Otu02128 | unknown(100);unclassified(100);unclassified(100);unclassified(100);unclassified(100);unclassified(100);                   |              |                           |                                                                                              |                                                                        |                                                |                                          |                                                |
| Otu02129 | k                                                                                                                         | Fungi(100);p | Basidiomycota(100);c      | Dacrymycetes(100);o                                                                          | Dacrymycetales(100);f                                                  | Dacrymycetaceae(100);g                         | Cerinosterus(100);s                      | Cerinosterus sp(100);                          |
| Otu02130 | unclassified(100);unclassified(100);unclassified(100);unclassified(100);unclassified(100);unclassified(100);              |              |                           |                                                                                              |                                                                        |                                                |                                          |                                                |
| Otu02131 | unknown(100);unclassified(100);unclassified(100);unclassified(100);unclassified(100);unclassified(100);                   |              |                           |                                                                                              |                                                                        |                                                |                                          |                                                |
| Otu02132 | k                                                                                                                         | Fungi(100);p | Ascomycota(100);c         | Dothideomycetes(100);o                                                                       | Dothideomycetes order Incertae sedis(100);f                            | Pseudeurotiaceae(100);g                        | Pseudeurotium(100);s                     | Pseudeurotium hygrophilum(100);                |
| Otu02135 | k                                                                                                                         | Fungi(100);p | Zygomycota(100);c         | Zygomycota class Incertae sedis(100);o                                                       | Mucorales(100);f                                                       | Cunninghamellaceae(100);g                      | Absidia(100);s                           | Absidia cylindrospora var. cylindrospora(100); |
| Otu02136 | unknown(100);unclassified(100);unclassified(100);unclassified(100);unclassified(100);unclassified(100);                   |              |                           |                                                                                              |                                                                        |                                                |                                          |                                                |
| Otu02137 | k                                                                                                                         | Fungi(100);p | Ascomycota(100);c         | Leotiomycetes(100);o                                                                         | Helotiales(100);f                                                      | Hyaloscyphaceae(100);g                         | unclassified Hyaloscyphaceae(100);s      | Hyaloscyphaceae sp(100);                       |
| Otu02138 | k                                                                                                                         | Fungi(100);p | Basidiomycota(100);c      | Agaricomycetes(100);o                                                                        | Agaricales(100);f                                                      | Cortinariaceae(100);g                          | Cortinarius(100);s                       | Cortinarius casimiri(100);                     |
| Otu02141 | k                                                                                                                         | Fungi(100);p | Glomeromycota(100);c      | Glomeromycetes(100);o                                                                        | Glomerales(100);f                                                      | Glomeraceae(100);g                             | Funnelliformis(100);s                    | Funnelliformis caledonium(100);                |
| Otu02143 | k                                                                                                                         | Fungi(100);p | Rozellomycota(100);c      | unclassified Rozellomycota(100);o                                                            | unclassified Rozellomycota(100);f                                      | unclassified Rozellomycota(100);g              | unclassified Rozellomycota(100);s        | Rozellomycota sp(100);                         |
| Otu02144 | k                                                                                                                         | Fungi(100);p | unclassified Fungi(100);c | unclassified Fungi(100);o                                                                    | unclassified Fungi(100);f                                              | unclassified Fungi(100);g                      | unclassified Fungi(100);s                | Fungi sp(100);                                 |
| Otu02145 | k                                                                                                                         | Fungi(100);p | Ascomycota(100);c         | Leotiomycetes(100);unclassified(100);unclassified(100);unclassified(100);unclassified(100);  |                                                                        |                                                |                                          |                                                |
| Otu02146 | k                                                                                                                         | Fungi(100);p | Basidiomycota(100);c      | Agaricomycetes(100);unclassified(100);unclassified(100);unclassified(100);unclassified(100); |                                                                        |                                                |                                          |                                                |
| Otu02148 | k                                                                                                                         | Fungi(100);p | Basidiomycota(100);c      | Agaricomycetes(100);o                                                                        | Agaricales(100);f                                                      | Strophariaceae(100);g                          | Deconica(100);s                          | Deconica sp(100);                              |
| Otu02149 | k                                                                                                                         | Fungi(100);p | Ascomycota(100);c         | Leotiomycetes(100);o                                                                         | Helotiales(100);f                                                      | Helotiales family Incertae sedis(100);g        | Infundichalara(100);s                    | Infundichalara sp(100);                        |
| Otu02150 | unknown(100);unclassified(100);unclassified(100);unclassified(100);unclassified(100);unclassified(100);                   |              |                           |                                                                                              |                                                                        |                                                |                                          |                                                |
| Otu02151 | k                                                                                                                         | Fungi(100);p | Ascomycota(100);c         | Eurotiomycetes(100);o                                                                        | Chaetothiales(100);f                                                   | Herpotrichiellaceae(100);g                     | Cladophialophora(100);unclassified(100); |                                                |
| Otu02152 | k                                                                                                                         | Fungi(100);p | Basidiomycota(100);c      | Tremellomycetes(100);o                                                                       | unclassified Tremellomycetes(100);f                                    | unclassified Tremellomycetes(100);g            | unclassified Tremellomycetes(100);s      | Tremellomycetes sp(100);                       |
| Otu02153 | k                                                                                                                         | Fungi(100);p | Ascomycota(100);c         | Leotiomycetes(100);o                                                                         | Helotiales(100);unclassified(100);unclassified(100);unclassified(100); |                                                |                                          |                                                |
| Otu02154 | k                                                                                                                         | Fungi(100);p | Ascomycota(100);c         | Leotiomycetes(100);o                                                                         | Rhytismatales(100);f                                                   | unclassified Rhytismatales(100);g              | unclassified Rhytismatales(100);s        | Rhytismatales sp(100);                         |
| Otu02155 | unclassified(100);unclassified(100);unclassified(100);unclassified(100);unclassified(100);unclassified(100);              |              |                           |                                                                                              |                                                                        |                                                |                                          |                                                |
| Otu02157 | k                                                                                                                         | Fungi(100);p | Basidiomycota(100);c      | Agaricomycetes(100);o                                                                        | Atheliales(100);f                                                      | Atheliales(100);g                              | Piloderma(100);s                         | Piloderma sp(100);                             |
| Otu02158 | k                                                                                                                         | Fungi(100);p | Basidiomycota(100);c      | Agaricomycetes(100);o                                                                        | Agaricales(100);f                                                      | Tricholomataceae(100);g                        | Tricholomopsis(100);s                    | Tricholomopsis osiliensis(100);                |
| Otu02159 | unclassified(100);unclassified(100);unclassified(100);unclassified(100);unclassified(100);unclassified(100);              |              |                           |                                                                                              |                                                                        |                                                |                                          |                                                |
| Otu02160 | k                                                                                                                         | Fungi(100);p | Ascomycota(100);c         | Leotiomycetes(100);unclassified(100);unclassified(100);unclassified(100);unclassified(100);  |                                                                        |                                                |                                          |                                                |
| Otu02161 | k                                                                                                                         | Fungi(100);p | Ascomycota(100);c         | Leotiomycetes(100);o                                                                         | unclassified Leotiomycetes(100);f                                      | unclassified Leotiomycetes(100);g              | unclassified Leotiomycetes(100);s        | Leotiomycetes sp(100);                         |

Supplementary, TableS1A  
 Taxonomy of OTUs  
 Normalized data, identification according to blast UNITEv57

|          |                    |                    |                           |                                     |                                     |                                     |                                     |                                |                               |                           |
|----------|--------------------|--------------------|---------------------------|-------------------------------------|-------------------------------------|-------------------------------------|-------------------------------------|--------------------------------|-------------------------------|---------------------------|
| Otu02162 | k                  | Fungi(100);p       | Basidiomycota(100);c      | Agaricomycetes(100);o               | Agaricales(100);f                   | Strophariaceae(100);g               | Pholiota(100);s                     | Pholiota conissans(100);       |                               |                           |
| Otu02163 | k                  | Fungi(100);p       | Ascomycota(100);c         | Sordariomycetes(100);o              | Sordariomycetes_order               | Incertae sedis(100);f               | Plectosphaerellaceae(100);g         | Verticillium(100);s            | Verticillium dahliae(100);    |                           |
| Otu02164 | k                  | Fungi(100);p       | Ascomycota(100);c         | unclassified(100);o                 | unclassified(100);f                 | unclassified(100);g                 | unclassified(100);s                 | unclassified(100);             |                               |                           |
| Otu02165 | k                  | Fungi(100);p       | Ascomycota(100);c         | Saccharomycetes(100);o              | Saccharomycetales(100);f            | Saccharomycetaceae(100);g           | Kluyveromyces(100);s                | Kluyveromyces blattae(100);    |                               |                           |
| Otu02166 | k                  | Fungi(100);p       | Ascomycota(100);c         | Leotiomycetes(100);o                | Helotiales(100);f                   | unclassified Helotiales(100);g      | unclassified Helotiales(100);s      | Helotiales_sp(100);            |                               |                           |
| Otu02167 | k                  | Fungi(100);p       | Basidiomycota(100);c      | Tritirachiomycetes(100);o           | Tritirachiomycetes_order            | Incertae sedis(100);f               | Tritirachiomycetes_family           | Incertae sedis(100);g          | Paratritirachium(100);s       | Paratritirachium_sp(100); |
| Otu02168 | k                  | Fungi(100);p       | Basidiomycota(100);c      | Tremellomycetes(100);o              | unclassified Tremellomycetes(100);f | unclassified Tremellomycetes(100);g | unclassified Tremellomycetes(100);s | Tremellomycetes_sp(100);       |                               |                           |
| Otu02169 | k                  | Fungi(100);p       | Ascomycota(100);c         | unclassified(100);o                 | unclassified(100);f                 | unclassified(100);g                 | unclassified(100);s                 | unclassified(100);             |                               |                           |
| Otu02170 | unclassified(100); | unclassified(100); | unclassified(100);        | unclassified(100);                  | unclassified(100);                  | unclassified(100);                  | unclassified(100);                  | unclassified(100);             |                               |                           |
| Otu02171 | k                  | Fungi(100);p       | Basidiomycota(100);c      | Agaricomycetes(100);o               | Boletales(100);f                    | Boletaceae(100);g                   | Chalciporus(100);s                  | Chalciporus_sp                 | JLF_2013(100);                |                           |
| Otu02172 | k                  | Fungi(100);p       | unclassified Fungi(100);c | unclassified Fungi(100);o           | unclassified Fungi(100);f           | unclassified Fungi(100);g           | unclassified Fungi(100);s           | Fungi_sp(100);                 |                               |                           |
| Otu02175 | unknown(100);      | unclassified(100); | unclassified(100);        | unclassified(100);                  | unclassified(100);                  | unclassified(100);                  | unclassified(100);                  | unclassified(100);             |                               |                           |
| Otu02176 | k                  | Fungi(100);p       | Basidiomycota(100);c      | Agaricomycetes(100);o               | Hymenochaetales(100);f              | Schizopora(100);g                   | Hyphodontia(100);s                  | Hyphodontia hastata(100);      |                               |                           |
| Otu02177 | k                  | Fungi(100);p       | Ascomycota(100);c         | Leotiomycetes(100);o                | Helotiales(100);f                   | Helotiales_family                   | Incertae sedis(100);g               | Scleropezicula(100);s          | Scleropezicula_sp(100);       |                           |
| Otu02178 | k                  | Fungi(100);p       | Ascomycota(100);c         | Leotiomycetes(100);o                | Helotiales(100);f                   | Dermateaceae(100);g                 | unclassified Dermateaceae(100);s    | Dermateaceae_sp(100);          |                               |                           |
| Otu02179 | k                  | Fungi(100);p       | Ascomycota(100);c         | Sordariomycetes(100);o              | Coniochaetales(100);f               | Coniochaetales(100);g               | unclassified Coniochaetales(100);s  | Coniochaetales_sp(100);        |                               |                           |
| Otu02180 | unknown(100);      | unclassified(100); | unclassified(100);        | unclassified(100);                  | unclassified(100);                  | unclassified(100);                  | unclassified(100);                  | unclassified(100);             |                               |                           |
| Otu02181 | unknown(100);      | unclassified(100); | unclassified(100);        | unclassified(100);                  | unclassified(100);                  | unclassified(100);                  | unclassified(100);                  | unclassified(100);             |                               |                           |
| Otu02182 | k                  | Fungi(100);p       | Basidiomycota(100);c      | Agaricomycetes(100);o               | Thelephorales(100);f                | unclassified Thelephorales(100);g   | unclassified Thelephorales(100);s   | Thelephorales_sp(100);         |                               |                           |
| Otu02185 | unclassified(100); | unclassified(100); | unclassified(100);        | unclassified(100);                  | unclassified(100);                  | unclassified(100);                  | unclassified(100);                  | unclassified(100);             |                               |                           |
| Otu02188 | k                  | Fungi(100);p       | unclassified Fungi(100);c | unclassified Fungi(100);o           | unclassified Fungi(100);f           | unclassified Fungi(100);g           | unclassified Fungi(100);s           | Fungi_sp(100);                 |                               |                           |
| Otu02189 | k                  | Fungi(100);p       | Basidiomycota(100);c      | Agaricomycetes(100);o               | Agaricales(100);f                   | Cortinariaceae(100);g               | Cortinarius(100);s                  | Cortinarius angelesianus(100); |                               |                           |
| Otu02190 | k                  | Fungi(100);p       | Ascomycota(100);c         | Saccharomycetes(100);o              | Saccharomycetales(100);f            | Dipodascaceae(100);g                | Basidioascus(100);s                 | Basidioascus magus(100);       |                               |                           |
| Otu02191 | unknown(100);      | unclassified(100); | unclassified(100);        | unclassified(100);                  | unclassified(100);                  | unclassified(100);                  | unclassified(100);                  | unclassified(100);             |                               |                           |
| Otu02192 | k                  | Fungi(100);p       | Ascomycota(100);c         | Leotiomycetes(100);o                | Helotiales(100);f                   | Helotiales_family                   | Incertae sedis(100);g               | Infundichalara(100);s          | Infundichalara_sp(100);       |                           |
| Otu02193 | k                  | Fungi(100);p       | Ascomycota(100);c         | Pezizomycetes(100);o                | Pezizales(100);f                    | Pyronemataceae(100);g               | Geopora(100);s                      | Geopora_sp(100);               |                               |                           |
| Otu02194 | k                  | Fungi(100);p       | Basidiomycota(100);c      | Agaricomycetes(100);o               | Auriculariales(100);f               | unclassified Auriculariales(100);g  | unclassified Auriculariales(100);s  | Auriculariales_sp(100);        |                               |                           |
| Otu02195 | k                  | Fungi(100);p       | Basidiomycota(100);c      | Agaricomycetes(100);o               | Cantharellales(100);f               | Clavulinaceae(100);g                | Clavulina(100);s                    | Clavulina_sp                   | 73793(100);                   |                           |
| Otu02196 | k                  | Fungi(100);p       | Ascomycota(100);c         | Eurotiomycetes(100);o               | Eurotiales(100);f                   | Trichocomaceae(100);g               | Eupenicillium(100);s                | Eupenicillium_sp               | KB9(100);                     |                           |
| Otu02197 | k                  | Fungi(100);p       | Basidiomycota(100);c      | Agaricomycetes(100);o               | Polyporales(100);f                  | Meruliaceae(100);g                  | Phlebia(100);s                      | Phlebia tuberculata(100);      |                               |                           |
| Otu02198 | k                  | Fungi(100);p       | Glomeromycota(100);c      | Glomeromycetes(100);o               | Glomerales(100);f                   | Glomeraceae(100);g                  | unclassified Glomeraceae(100);s     | Glomeraceae_sp(100);           |                               |                           |
| Otu02199 | k                  | Fungi(100);p       | Rozellomycota(100);c      | unclassified Rozellomycota(100);o   | unclassified Rozellomycota(100);f   | unclassified Rozellomycota(100);g   | unclassified Rozellomycota(100);s   | Rozellomycota_sp(100);         |                               |                           |
| Otu02200 | k                  | Fungi(100);p       | Basidiomycota(100);c      | Agaricomycetes(100);o               | Hymenochaetales(100);f              | Schizopora(100);g                   | Schizopora(100);s                   | Schizopora paradoxa(100);      |                               |                           |
| Otu02202 | k                  | Fungi(100);p       | Ascomycota(100);c         | Leotiomycetes(100);o                | Helotiales(100);f                   | unclassified Helotiales(100);g      | unclassified Helotiales(100);s      | Helotiales_sp(100);            |                               |                           |
| Otu02204 | unclassified(100); | unclassified(100); | unclassified(100);        | unclassified(100);                  | unclassified(100);                  | unclassified(100);                  | unclassified(100);                  | unclassified(100);             |                               |                           |
| Otu02205 | k                  | Fungi(100);p       | Ascomycota(100);c         | Leotiomycetes(100);o                | Helotiales(100);f                   | Helotiales_family                   | Incertae sedis(100);g               | Infundichalara(100);s          | Infundichalara_sp(100);       |                           |
| Otu02206 | unknown(100);      | unclassified(100); | unclassified(100);        | unclassified(100);                  | unclassified(100);                  | unclassified(100);                  | unclassified(100);                  | unclassified(100);             |                               |                           |
| Otu02207 | k                  | Fungi(100);p       | Ascomycota(100);c         | Pezizomycetes(100);o                | Pezizales(100);f                    | Pyronemataceae(100);g               | unclassified(100);s                 | unclassified(100);             |                               |                           |
| Otu02210 | k                  | Fungi(100);p       | Ascomycota(100);c         | Pezizomycetes(100);o                | Pezizales(100);f                    | Pyronemataceae(100);g               | Geopora(100);s                      | Geopora_sp(100);               |                               |                           |
| Otu02211 | k                  | Fungi(100);p       | Basidiomycota(100);c      | Agaricomycetes(100);o               | Agaricales(100);f                   | unclassified Agaricales(100);g      | unclassified Agaricales(100);s      | Agaricales_sp(100);            |                               |                           |
| Otu02212 | k                  | Fungi(100);p       | Ascomycota(100);c         | Leotiomycetes(100);o                | unclassified Leotiomycetes(100);f   | unclassified Leotiomycetes(100);g   | unclassified Leotiomycetes(100);s   | Leotiomycetes_sp(100);         |                               |                           |
| Otu02213 | k                  | Fungi(100);p       | Ascomycota(100);c         | Leotiomycetes(100);o                | Helotiales(100);f                   | Dermateaceae(100);g                 | unclassified Dermateaceae(100);s    | Dermateaceae_sp(100);          |                               |                           |
| Otu02216 | k                  | Fungi(100);p       | Basidiomycota(100);c      | Microbotryomycetes(100);o           | Sporidiobolales(100);f              | Sporidiobolales_family              | Incertae sedis(100);g               | Rhodotorula auriculariae(100); |                               |                           |
| Otu02217 | k                  | Fungi(100);p       | Basidiomycota(100);c      | Microbotryomycetes(100);o           | Sporidiobolales(100);f              | unclassified Sporidiobolales(100);g | unclassified Sporidiobolales(100);s | Sporidiobolales_sp(100);       |                               |                           |
| Otu02218 | k                  | Fungi(100);p       | Basidiomycota(100);c      | Agaricomycetes(100);o               | Hymenochaetales(100);f              | unclassified Hymenochaetales(100);g | unclassified Hymenochaetales(100);s | Hymenochaetales_sp(100);       |                               |                           |
| Otu02220 | k                  | Fungi(100);p       | Basidiomycota(100);c      | Agaricomycetes(100);o               | Cantharellales(100);f               | Clavulinaceae(100);g                | unclassified Clavulinaceae(100);s   | Clavulinaceae_sp(100);         |                               |                           |
| Otu02221 | unknown(100);      | unclassified(100); | unclassified(100);        | unclassified(100);                  | unclassified(100);                  | unclassified(100);                  | unclassified(100);                  | unclassified(100);             |                               |                           |
| Otu02222 | unknown(100);      | unclassified(100); | unclassified(100);        | unclassified(100);                  | unclassified(100);                  | unclassified(100);                  | unclassified(100);                  | unclassified(100);             |                               |                           |
| Otu02224 | k                  | Fungi(100);p       | Basidiomycota(100);c      | Agaricomycetes(100);o               | Agaricales(100);f                   | Agaricaceae(100);g                  | Lycoperdon(100);s                   | Lycoperdon pyriforme(100);     |                               |                           |
| Otu02226 | k                  | Fungi(100);p       | Ascomycota(100);c         | Leotiomycetes(100);o                | Helotiales(100);f                   | Helotiaceae(100);g                  | unclassified Helotiaceae(100);s     | Helotiaceae_sp(100);           |                               |                           |
| Otu02227 | k                  | Fungi(100);p       | Basidiomycota(100);c      | Agaricomycetes(100);o               | Agaricales(100);f                   | Cortinariaceae(100);g               | Cortinarius(100);s                  | Cortinarius subfloccopus(100); |                               |                           |
| Otu02228 | unknown(100);      | unclassified(100); | unclassified(100);        | unclassified(100);                  | unclassified(100);                  | unclassified(100);                  | unclassified(100);                  | unclassified(100);             |                               |                           |
| Otu02230 | k                  | Fungi(100);p       | Basidiomycota(100);c      | Agaricomycetes(100);o               | Agaricales(100);f                   | Tricholomataceae(100);g             | Arrhenia(100);s                     | Arrhenia epichysium(100);      |                               |                           |
| Otu02232 | k                  | Fungi(100);p       | Ascomycota(100);c         | unclassified(100);o                 | unclassified(100);f                 | unclassified(100);g                 | unclassified(100);s                 | unclassified(100);             |                               |                           |
| Otu02233 | k                  | Fungi(100);p       | Ascomycota(100);c         | Lecanoromycetes(100);o              | Ostropales(100);f                   | Stictidaceae(100);g                 | Cryptodiscus(100);s                 | Cryptodiscus_sp(100);          |                               |                           |
| Otu02234 | unclassified(100); | unclassified(100); | unclassified(100);        | unclassified(100);                  | unclassified(100);                  | unclassified(100);                  | unclassified(100);                  | unclassified(100);             |                               |                           |
| Otu02236 | unknown(100);      | unclassified(100); | unclassified(100);        | unclassified(100);                  | unclassified(100);                  | unclassified(100);                  | unclassified(100);                  | unclassified(100);             |                               |                           |
| Otu02237 | unknown(100);      | unclassified(100); | unclassified(100);        | unclassified(100);                  | unclassified(100);                  | unclassified(100);                  | unclassified(100);                  | unclassified(100);             |                               |                           |
| Otu02238 | k                  | Fungi(100);p       | Basidiomycota(100);c      | Agaricomycetes(100);o               | Russulales(100);f                   | Russulaceae(100);g                  | Gymnomyces(100);s                   | Gymnomyces monosporus(100);    |                               |                           |
| Otu02240 | unclassified(100); | unclassified(100); | unclassified(100);        | unclassified(100);                  | unclassified(100);                  | unclassified(100);                  | unclassified(100);                  | unclassified(100);             |                               |                           |
| Otu02241 | k                  | Fungi(100);p       | Basidiomycota(100);c      | Agaricomycetes(100);o               | Agaricales(100);f                   | unclassified Agaricales(100);g      | unclassified Agaricales(100);s      | Agaricales_sp(100);            |                               |                           |
| Otu02242 | unknown(100);      | unclassified(100); | unclassified(100);        | unclassified(100);                  | unclassified(100);                  | unclassified(100);                  | unclassified(100);                  | unclassified(100);             |                               |                           |
| Otu02243 | k                  | Fungi(100);p       | Basidiomycota(100);c      | Microbotryomycetes(100);o           | Sporidiobolales(100);f              | Sporidiobolales_family              | Incertae sedis(100);g               | Sporobolomyces(100);s          | Sporobolomyces sasicola(100); |                           |
| Otu02244 | k                  | Fungi(100);p       | Chytridiomycota(100);c    | unclassified Chytridiomycota(100);o | unclassified Chytridiomycota(100);f | unclassified Chytridiomycota(100);g | unclassified Chytridiomycota(100);s | Chytridiomycota_sp(100);       |                               |                           |
| Otu02245 | unknown(100);      | unclassified(100); | unclassified(100);        | unclassified(100);                  | unclassified(100);                  | unclassified(100);                  | unclassified(100);                  | unclassified(100);             |                               |                           |
| Otu02246 | k                  | Fungi(100);p       | Ascomycota(100);c         | Sordariomycetes(100);o              | Hypocreales(100);f                  | Bionectriaceae(100);g               | Bionectria(100);s                   | Bionectria_sp(100);            |                               |                           |

Supplementary, TableS1A  
 Taxonomy of OTUs  
 Normalized data, identification according to blast UNITEvs7

|          |                                                                                                                                |              |                                                                                                            |                                                                                                              |                                             |                                                                          |                                      |                                 |
|----------|--------------------------------------------------------------------------------------------------------------------------------|--------------|------------------------------------------------------------------------------------------------------------|--------------------------------------------------------------------------------------------------------------|---------------------------------------------|--------------------------------------------------------------------------|--------------------------------------|---------------------------------|
| Otu02247 | k                                                                                                                              | Fungi(100);p | Ascomycota(100);c                                                                                          | Sordariomycetes(100);o                                                                                       | Ophiostomatales(100);f                      | Ophiostomataceae(100);g                                                  | Leptographium(100);s                 | Leptographium_piriforme(100);   |
| Otu02248 | k                                                                                                                              | Fungi(100);p | Basidiomycota(100);c                                                                                       | Agaricomycetes(100);o                                                                                        | Agaricales(100);f                           | unclassified_Agaricales(100);g                                           | unclassified_Agaricales(100);s       | Agaricales_sp(100);             |
| Otu02249 | k                                                                                                                              | Fungi(100);p | Basidiomycota(100);c                                                                                       | Agaricomycetes(100);o                                                                                        | Agaricales(100);f                           | Cortinariaceae(100);g                                                    | Cortinarius(100);s                   | Cortinarius_gentilis(100);      |
| Otu02253 | k                                                                                                                              | Fungi(100);p | Basidiomycota(100);c                                                                                       | Agaricomycetes(100);o                                                                                        | Polyporales(100);f                          | Meruliaceae(100);g                                                       | Hyphoderma(100);s                    | Hyphoderma_praeterrisum(100);   |
| Otu02257 | unclassified(100);unclassified(100);unclassified(100);unclassified(100);unclassified(100);unclassified(100);                   |              |                                                                                                            |                                                                                                              |                                             |                                                                          |                                      |                                 |
| Otu02258 | k                                                                                                                              | Fungi(100);p | Basidiomycota(100);c                                                                                       | Agaricomycetes(100);o                                                                                        | Telephorales(100);f                         | Telephoraceae(100);g                                                     | Tomentella(100);s                    | Tomentella_lateritia(100);      |
| Otu02260 | k                                                                                                                              | Fungi(100);p | Ascomycota(100);c                                                                                          | Dothideomycetes(100);o                                                                                       | Dothideomycetes_order_Incertae_sedis(100);f | Pseudeurotiaceae(100);g                                                  | unclassified_Pseudeurotiaceae(100);s | Pseudeurotiaceae_sp(100);       |
| Otu02261 | k                                                                                                                              | Fungi(100);p | Rozellomycota(100);c                                                                                       | unclassified_Rozellomycota(100);o                                                                            | unclassified_Rozellomycota(100);f           | unclassified_Rozellomycota(100);g                                        | unclassified_Rozellomycota(100);s    | Rozellomycota_sp(100);          |
| Otu02262 | k                                                                                                                              | Fungi(100);p | Ascomycota(100);c                                                                                          | Eurotiomycetes(100);o                                                                                        | Chaetothyriales(100);f                      | unclassified_Chaetothyriales(100);g                                      | unclassified_Chaetothyriales(100);s  | Chaetothyriales_sp(100);        |
| Otu02263 | k                                                                                                                              | Fungi(100);p | Ascomycota(100);unclassified(100);unclassified(100);unclassified(100);unclassified(100);unclassified(100); |                                                                                                              |                                             |                                                                          |                                      |                                 |
| Otu02265 | k                                                                                                                              | Fungi(100);p | Ascomycota(100);c                                                                                          | Saccharomycetes(100);o                                                                                       | Saccharomycetales(100);f                    | Dipodascaceae(100);g                                                     | Basidioascus(100);s                  | Basidioascus_magus(100);        |
| Otu02266 | unclassified(100);unclassified(100);unclassified(100);unclassified(100);unclassified(100);unclassified(100);unclassified(100); |              |                                                                                                            |                                                                                                              |                                             |                                                                          |                                      |                                 |
| Otu02267 | k                                                                                                                              | Fungi(100);p | Zygomycota(100);c                                                                                          | unclassified_Zygomycota(100);o                                                                               | unclassified_Zygomycota(100);f              | unclassified_Zygomycota(100);g                                           | unclassified_Zygomycota(100);s       | Zygomycota_sp(100);             |
| Otu02268 | unknown(100);unclassified(100);unclassified(100);unclassified(100);unclassified(100);unclassified(100);unclassified(100);      |              |                                                                                                            |                                                                                                              |                                             |                                                                          |                                      |                                 |
| Otu02269 | k                                                                                                                              | Fungi(100);p | Ascomycota(100);c                                                                                          | Ascomycota_class_Incertae_sedis(100);o                                                                       | Ascomycota_order_Incertae_sedis(100);f      | Ascomycota_family_Incertae_sedis(100);g                                  | Chalara(100);s                       | Chalara_piceae-abietis(100);    |
| Otu02270 | k                                                                                                                              | Fungi(100);p | Ascomycota(100);c                                                                                          | Eurotiomycetes(100);o                                                                                        | Onygenales(100);f                           | Onygenaceae(100);g                                                       | Auxarthron(100);s                    | Auxarthron_ostraviense(100);    |
| Otu02271 | unknown(100);unclassified(100);unclassified(100);unclassified(100);unclassified(100);unclassified(100);unclassified(100);      |              |                                                                                                            |                                                                                                              |                                             |                                                                          |                                      |                                 |
| Otu02272 | unclassified(100);unclassified(100);unclassified(100);unclassified(100);unclassified(100);unclassified(100);unclassified(100); |              |                                                                                                            |                                                                                                              |                                             |                                                                          |                                      |                                 |
| Otu02273 | k                                                                                                                              | Fungi(100);p | Ascomycota(100);c                                                                                          | Leotiomycetes(100);o                                                                                         | Helotiales(100);f                           | Hyaloscyphaeaceae(100);g                                                 | Hyalopeziza(100);s                   | Hyalopeziza_tns_F17975(100);    |
| Otu02274 | unknown(100);unclassified(100);unclassified(100);unclassified(100);unclassified(100);unclassified(100);unclassified(100);      |              |                                                                                                            |                                                                                                              |                                             |                                                                          |                                      |                                 |
| Otu02275 | k                                                                                                                              | Fungi(100);p | Ascomycota(100);c                                                                                          | Dothideomycetes(100);o                                                                                       | Dothideomycetes_order_Incertae_sedis(100);f | Myxotrichaceae(100);g                                                    | Oidiodendron(100);s                  | Oidiodendron_sp(100);           |
| Otu02277 | k                                                                                                                              | Fungi(100);p | Zygomycota(100);c                                                                                          | Zygomycota_class_Incertae_sedis(100);o                                                                       | Mortierellales(100);f                       | Mortierellaceae(100);g                                                   | Mortierella(100);s                   | Mortierella_sp(100);            |
| Otu02278 | k                                                                                                                              | Fungi(100);p | Basidiomycota(100);c                                                                                       | Agaricomycetes(100);o                                                                                        | Atheliales(100);f                           | Atheliaceae(100);g                                                       | Piloderma(100);s                     | Piloderma_sphaerosporum(100);   |
| Otu02280 | k                                                                                                                              | Fungi(100);p | Ascomycota(100);c                                                                                          | Pezizomycetes(100);o                                                                                         | Pezizales(100);f                            | Pyrenomataceae(100);g                                                    | Wilcoxina(100);s                     | Wilcoxina_sp(100);              |
| Otu02281 | k                                                                                                                              | Fungi(100);p | Basidiomycota(100);c                                                                                       | Microbotryomycetes(100);o                                                                                    | Sporidiobolales(100);f                      | Sporidiobolales_family_Incertae_sedis(100);g                             | Rhodotorula(100);s                   | Rhodotorula_cycloclastica(100); |
| Otu02283 | unknown(100);unclassified(100);unclassified(100);unclassified(100);unclassified(100);unclassified(100);unclassified(100);      |              |                                                                                                            |                                                                                                              |                                             |                                                                          |                                      |                                 |
| Otu02284 | k                                                                                                                              | Fungi(100);p | Ascomycota(100);c                                                                                          | Dothideomycetes(100);o                                                                                       | unclassified_Dothideomycetes(100);f         | unclassified_Dothideomycetes(100);g                                      | unclassified_Dothideomycetes(100);s  | Dothideomycetes_sp(100);        |
| Otu02285 | k                                                                                                                              | Fungi(100);p | Ascomycota(100);c                                                                                          | Lecanoromycetes(100);o                                                                                       | Lecanorales(100);f                          | Stereocaulaceae(100);g                                                   | Lepraria(100);s                      | Lepraria_jackii(100);           |
| Otu02287 | unknown(100);unclassified(100);unclassified(100);unclassified(100);unclassified(100);unclassified(100);unclassified(100);      |              |                                                                                                            |                                                                                                              |                                             |                                                                          |                                      |                                 |
| Otu02288 | k                                                                                                                              | Fungi(100);p | Basidiomycota(100);c                                                                                       | Agaricomycetes(100);o                                                                                        | Agaricales(100);f                           | unclassified_Agaricales(100);g                                           | unclassified_Agaricales(100);s       | Agaricales_sp(100);             |
| Otu02290 | k                                                                                                                              | Fungi(100);p | Ascomycota(100);c                                                                                          | Dothideomycetes(100);o                                                                                       | Capnodiales(100);f                          | Davidiellaceae(100);g                                                    | Cladosporium(100);s                  | Cladosporium_sp(100);           |
| Otu02291 | unknown(100);unclassified(100);unclassified(100);unclassified(100);unclassified(100);unclassified(100);unclassified(100);      |              |                                                                                                            |                                                                                                              |                                             |                                                                          |                                      |                                 |
| Otu02292 | k                                                                                                                              | Fungi(100);p | Zygomycota(100);c                                                                                          | Zygomycota_class_Incertae_sedis(100);o                                                                       | Mortierellales(100);f                       | Mortierellaceae(100);g                                                   | unclassified_Mortierellaceae(100);s  | Mortierellaceae_sp(100);        |
| Otu02294 | k                                                                                                                              | Fungi(100);p | Chytridiomycota(100);c                                                                                     | Blastocladiomycetes(100);o                                                                                   | Blastocladiiales(100);f                     | Blastocladiaceae(100);g                                                  | Blastocladiella(100);s               | Blastocladiella_emersoni(100);  |
| Otu02295 | unknown(100);unclassified(100);unclassified(100);unclassified(100);unclassified(100);unclassified(100);unclassified(100);      |              |                                                                                                            |                                                                                                              |                                             |                                                                          |                                      |                                 |
| Otu02296 | k                                                                                                                              | Fungi(100);p | Ascomycota(100);c                                                                                          | Leotiomycetes(100);o                                                                                         | Rhytismatales(100);f                        | Rhytismataceae(100);g                                                    | unclassified_Rhytismataceae(100);s   | Rhytismataceae_sp(100);         |
| Otu02297 | k                                                                                                                              | Fungi(100);p | Ascomycota(100);c                                                                                          | unclassified(100);unclassified(100);unclassified(100);unclassified(100);unclassified(100);unclassified(100); |                                             |                                                                          |                                      |                                 |
| Otu02298 | k                                                                                                                              | Fungi(100);p | Chytridiomycota(100);c                                                                                     | unclassified_Chytridiomycota(100);o                                                                          | unclassified_Chytridiomycota(100);f         | unclassified_Chytridiomycota(100);g                                      | unclassified_Chytridiomycota(100);s  | Chytridiomycota_sp(100);        |
| Otu02299 | k                                                                                                                              | Fungi(100);p | Ascomycota(100);c                                                                                          | Dothideomycetes(100);o                                                                                       | Pleosporales(100);f                         | Sporormiaceae(100);g                                                     | unclassified_Sporormiaceae(100);s    | Sporormiaceae_sp(100);          |
| Otu02300 | k                                                                                                                              | Fungi(100);p | Basidiomycota(100);c                                                                                       | Agaricomycetes(100);o                                                                                        | Boletales(100);f                            | Tapinellaceae(100);g                                                     | Tapinella(100);s                     | Tapinella_panuoides(100);       |
| Otu02302 | unknown(100);unclassified(100);unclassified(100);unclassified(100);unclassified(100);unclassified(100);unclassified(100);      |              |                                                                                                            |                                                                                                              |                                             |                                                                          |                                      |                                 |
| Otu02303 | k                                                                                                                              | Fungi(100);p | Glomeromycota(100);c                                                                                       | Glomeromycetes(100);o                                                                                        | Diversisporales(100);f                      | Diversisporaceae(100);g                                                  | Diversispora(100);s                  | Diversispora_celata(100);       |
| Otu02304 | unknown(100);unclassified(100);unclassified(100);unclassified(100);unclassified(100);unclassified(100);unclassified(100);      |              |                                                                                                            |                                                                                                              |                                             |                                                                          |                                      |                                 |
| Otu02305 | k                                                                                                                              | Fungi(100);p | Basidiomycota(100);c                                                                                       | Agaricomycetes(100);o                                                                                        | Agaricales(100);f                           | Cortinariaceae(100);g                                                    | Cortinarius(100);s                   | Cortinarius_idahoensis(100);    |
| Otu02306 | k                                                                                                                              | Fungi(100);p | Ascomycota(100);c                                                                                          | Dothideomycetes(100);o                                                                                       | unclassified_Dothideomycetes(100);f         | unclassified_Dothideomycetes(100);g                                      | unclassified_Dothideomycetes(100);s  | Dothideomycetes_sp(100);        |
| Otu02308 | k                                                                                                                              | Fungi(100);p | Basidiomycota(100);c                                                                                       | Agaricomycetes(100);o                                                                                        | Auriculariales(100);f                       | Auriculariales_family_Incertae_sedis(100);g                              | Elmerina(100);s                      | Elmerina_cladophora(100);       |
| Otu02309 | k                                                                                                                              | Fungi(100);p | Ascomycota(100);c                                                                                          | unclassified_Ascmycota(100);o                                                                                | unclassified_Ascmycota(100);f               | unclassified_Ascmycota(100);g                                            | unclassified_Ascmycota(100);s        | Ascomycota_sp(100);             |
| Otu02310 | k                                                                                                                              | Fungi(100);p | Ascomycota(100);c                                                                                          | Leotiomycetes(100);o                                                                                         | Helotiales(100);f                           | unclassified_Helotiales(100);g                                           | unclassified_Helotiales(100);s       | Helotiales_sp(100);             |
| Otu02312 | k                                                                                                                              | Fungi(100);p | Basidiomycota(100);c                                                                                       | Agaricomycetes(100);o                                                                                        | Agaricales(100);f                           | Cortinariaceae(100);g                                                    | Cortinarius(100);s                   | Cortinarius_sp(100);            |
| Otu02313 | unknown(100);unclassified(100);unclassified(100);unclassified(100);unclassified(100);unclassified(100);unclassified(100);      |              |                                                                                                            |                                                                                                              |                                             |                                                                          |                                      |                                 |
| Otu02314 | unclassified(100);unclassified(100);unclassified(100);unclassified(100);unclassified(100);unclassified(100);unclassified(100); |              |                                                                                                            |                                                                                                              |                                             |                                                                          |                                      |                                 |
| Otu02315 | k                                                                                                                              | Fungi(100);p | Ascomycota(100);c                                                                                          | Ascomycota_class_Incertae_sedis(100);o                                                                       | Ascomycota_order_Incertae_sedis(100);f      | Ascomycota_family_Incertae_sedis(100);g                                  | Chalara(100);s                       | Chalara_microspora(100);        |
| Otu02316 | k                                                                                                                              | Fungi(100);p | Basidiomycota(100);c                                                                                       | Tremellomycetes(100);o                                                                                       | unclassified_Tremellomycetes(100);f         | unclassified_Tremellomycetes(100);g                                      | unclassified_Tremellomycetes(100);s  | Tremellomycetes_sp(100);        |
| Otu02317 | k                                                                                                                              | Fungi(100);p | Ascomycota(100);c                                                                                          | Sordariomycetes(100);o                                                                                       | Hypocreales(100);f                          | unclassified(100);unclassified(100);unclassified(100);unclassified(100); |                                      |                                 |
| Otu02318 | unknown(100);unclassified(100);unclassified(100);unclassified(100);unclassified(100);unclassified(100);unclassified(100);      |              |                                                                                                            |                                                                                                              |                                             |                                                                          |                                      |                                 |
| Otu02319 | k                                                                                                                              | Fungi(100);p | Ascomycota(100);c                                                                                          | Dothideomycetes(100);o                                                                                       | Dothideomycetes_order_Incertae_sedis(100);f | Myxotrichaceae(100);g                                                    | Oidiodendron(100);s                  | Oidiodendron_sp(100);           |
| Otu02320 | unknown(100);unclassified(100);unclassified(100);unclassified(100);unclassified(100);unclassified(100);unclassified(100);      |              |                                                                                                            |                                                                                                              |                                             |                                                                          |                                      |                                 |
| Otu02321 | k                                                                                                                              | Fungi(100);p | Rozellomycota(100);c                                                                                       | unclassified_Rozellomycota(100);o                                                                            | unclassified_Rozellomycota(100);f           | unclassified_Rozellomycota(100);g                                        | unclassified_Rozellomycota(100);s    | Rozellomycota_sp(100);          |
| Otu02322 | unknown(100);unclassified(100);unclassified(100);unclassified(100);unclassified(100);unclassified(100);unclassified(100);      |              |                                                                                                            |                                                                                                              |                                             |                                                                          |                                      |                                 |
| Otu02323 | k                                                                                                                              | Fungi(100);p | Ascomycota(100);c                                                                                          | Eurotiomycetes(100);o                                                                                        | Verrucariales(100);f                        | Verrucariaceae(100);g                                                    | Dermatocarpon(100);s                 | Dermatocarpon_dolomiticum(100); |
| Otu02324 | k                                                                                                                              | Fungi(100);p | Basidiomycota(100);c                                                                                       | Agaricomycetes(100);o                                                                                        | Hymenochaetales(100);f                      | Schizoporaceae(100);g                                                    | Hyphodontia(100);s                   | Hyphodontia_aspera(100);        |
| Otu02325 | k                                                                                                                              | Fungi(100);p | Ascomycota(100);c                                                                                          | Lecanoromycetes(100);o                                                                                       | Lecanorales(100);f                          | Byssolomataceae(100);g                                                   | Fellhanera(100);s                    | Fellhanera_boutillei(100);      |
| Otu02326 | k                                                                                                                              | Fungi(100);p | Rozellomycota(100);c                                                                                       | unclassified_Rozellomycota(100);o                                                                            | unclassified_Rozellomycota(100);f           | unclassified_Rozellomycota(100);g                                        | unclassified_Rozellomycota(100);s    | Rozellomycota_sp(100);          |
| Otu02327 | unknown(100);unclassified(100);unclassified(100);unclassified(100);unclassified(100);unclassified(100);unclassified(100);      |              |                                                                                                            |                                                                                                              |                                             |                                                                          |                                      |                                 |
| Otu02328 | k                                                                                                                              | Fungi(100);p | Basidiomycota(100);c                                                                                       | Microbotryomycetes(100);o                                                                                    | Sporidiobolales(100);f                      | Sporidiobolales_family_Incertae_sedis(100);g                             | Rhodotorula(100);s                   | Rhodotorula_sp_MLB_I(100);      |
| Otu02329 | k                                                                                                                              | Fungi(100);p | Basidiomycota(100);c                                                                                       | Microbotryomycetes(100);o                                                                                    | Leucosporidiales(100);f                     | unclassified_Leucosporidiales(100);g                                     | unclassified_Leucosporidiales(100);s | Leucosporidiales_sp(100);       |



Supplementary, TableS1A  
 Taxonomy of OTUs  
 Normalized data, identification according to blast UNITEv7

|          |                                                                                                                                |              |                           |                                                                                               |                                     |                                                          |                                         |                                      |
|----------|--------------------------------------------------------------------------------------------------------------------------------|--------------|---------------------------|-----------------------------------------------------------------------------------------------|-------------------------------------|----------------------------------------------------------|-----------------------------------------|--------------------------------------|
| Otu02330 | k                                                                                                                              | Fungi(100);p | Ascomycota(100);c         | Saccharomycetes(100);o                                                                        | Saccharomycetales(100);f            | Dipodascaceae(100);g                                     | Basidioascus(100);s                     | Basidioascus magus(100);             |
| Otu02331 | k                                                                                                                              | Fungi(100);p | Basidiomycota(100);c      | Agaricomycetes(100);o                                                                         | Polyporales(100);f                  | unclassified Polyporales(100);g                          | unclassified Polyporales(100);s         | Polyporales sp(100);                 |
| Otu02332 | k                                                                                                                              | Fungi(100);p | Ascomycota(100);c         | Eurotiomycetes(100);o                                                                         | Chaetothyriales(100);f              | Herpotrichiellaceae(100);g                               | Phaeomoniella(100);s                    | Phaeomoniella sp(100);               |
| Otu02334 | k                                                                                                                              | Fungi(100);p | Basidiomycota(100);c      | Agaricomycetes(100);o                                                                         | Cantharellales(100);f               | unclassified Cantharellales(100);g                       | unclassified Cantharellales(100);s      | Cantharellales sp(100);              |
| Otu02335 | k                                                                                                                              | Fungi(100);p | Ascomycota(100);c         | Saccharomycetes(100);o                                                                        | Saccharomycetales(100);f            | unclassified Saccharomycetales(100);g                    | unclassified Saccharomycetales(100);s   | Saccharomycetales sp(100);           |
| Otu02336 | k                                                                                                                              | Fungi(100);p | Basidiomycota(100);c      | Microbotryomycetes(100);o                                                                     | Leucosporidiales(100);f             | Leucosporidiaceae(100);g                                 | Leucosporidium(100);s                   | Leucosporidium sp 8138_GP_2013(100); |
| Otu02337 | k                                                                                                                              | Fungi(100);p | Basidiomycota(100);c      | Agaricomycetes(100);o                                                                         | Auriculariales(100);f               | unclassified Auriculariales(100);g                       | unclassified Auriculariales(100);s      | Auriculariales sp(100);              |
| Otu02338 | unknown(100);unclassified(100);unclassified(100);unclassified(100);unclassified(100);unclassified(100);                        |              |                           |                                                                                               |                                     |                                                          |                                         |                                      |
| Otu02339 | unknown(100);unclassified(100);unclassified(100);unclassified(100);unclassified(100);unclassified(100);                        |              |                           |                                                                                               |                                     |                                                          |                                         |                                      |
| Otu02340 | k                                                                                                                              | Fungi(100);p | Basidiomycota(100);c      | Agaricomycetes(100);o                                                                         | Thelephorales(100);f                | Thelephoraceae(100);unclassified(100);unclassified(100); |                                         |                                      |
| Otu02342 | k                                                                                                                              | Fungi(100);p | Ascomycota(100);c         | Pezizomycetes(100);o                                                                          | Pezizales(100);f                    | Pezizaceae(100);g                                        | Kalaharituber(100);s                    | Kalaharituber pfeilii(100);          |
| Otu02343 | k                                                                                                                              | Fungi(100);p | Basidiomycota(100);c      | Microbotryomycetes(100);o                                                                     | Sporidiobolales(100);f              | Sporidiobolales_family_Incertae_sedis(100);g             | Rhodotorula(100);s                      | Rhodotorula sp_MLB_(100);            |
| Otu02344 | unknown(100);unclassified(100);unclassified(100);unclassified(100);unclassified(100);unclassified(100);unclassified(100);      |              |                           |                                                                                               |                                     |                                                          |                                         |                                      |
| Otu02346 | k                                                                                                                              | Fungi(100);p | Basidiomycota(100);c      | Agaricomycetes(100);o                                                                         | Agaricales(100);f                   | Inocybaceae(100);g                                       | Inocybe(100);s                          | Inocybe sp(100);                     |
| Otu02347 | unknown(100);unclassified(100);unclassified(100);unclassified(100);unclassified(100);unclassified(100);unclassified(100);      |              |                           |                                                                                               |                                     |                                                          |                                         |                                      |
| Otu02348 | unknown(100);unclassified(100);unclassified(100);unclassified(100);unclassified(100);unclassified(100);unclassified(100);      |              |                           |                                                                                               |                                     |                                                          |                                         |                                      |
| Otu02349 | k                                                                                                                              | Fungi(100);p | Ascomycota(100);c         | unclassified Ascomycota(100);o                                                                | unclassified Ascomycota(100);f      | unclassified Ascomycota(100);g                           | unclassified Ascomycota(100);s          | Ascomycota sp(100);                  |
| Otu02350 | k                                                                                                                              | Fungi(100);p | Zygomycota(100);c         | Zygomycota_class_Incertae_sedis(100);o                                                        | Basidiobolales(100);f               | Basidiobolaceae(100);g                                   | Basidiobolus(100);s                     | Basidiobolus ranarum(100);           |
| Otu02351 | unknown(100);unclassified(100);unclassified(100);unclassified(100);unclassified(100);unclassified(100);unclassified(100);      |              |                           |                                                                                               |                                     |                                                          |                                         |                                      |
| Otu02356 | unknown(100);unclassified(100);unclassified(100);unclassified(100);unclassified(100);unclassified(100);unclassified(100);      |              |                           |                                                                                               |                                     |                                                          |                                         |                                      |
| Otu02358 | unknown(100);unclassified(100);unclassified(100);unclassified(100);unclassified(100);unclassified(100);unclassified(100);      |              |                           |                                                                                               |                                     |                                                          |                                         |                                      |
| Otu02362 | unknown(100);unclassified(100);unclassified(100);unclassified(100);unclassified(100);unclassified(100);unclassified(100);      |              |                           |                                                                                               |                                     |                                                          |                                         |                                      |
| Otu02363 | k                                                                                                                              | Fungi(100);p | Ascomycota(100);c         | Eurotiomycetes(100);o                                                                         | Chaetothyriales(100);f              | Herpotrichiellaceae(100);g                               | unclassified Herpotrichiellaceae(100);s | Herpotrichiellaceae sp(100);         |
| Otu02366 | k                                                                                                                              | Fungi(100);p | Ascomycota(100);c         | Leotiomycetes(100);o                                                                          | Helotiales(100);f                   | unclassified Helotiales(100);g                           | unclassified Helotiales(100);s          | Helotiales sp(100);                  |
| Otu02368 | unknown(100);unclassified(100);unclassified(100);unclassified(100);unclassified(100);unclassified(100);unclassified(100);      |              |                           |                                                                                               |                                     |                                                          |                                         |                                      |
| Otu02369 | k                                                                                                                              | Fungi(100);p | Ascomycota(100);c         | Eurotiomycetes(100);o                                                                         | Chaetothyriales(100);f              | Herpotrichiellaceae(100);g                               | unclassified Herpotrichiellaceae(100);s | Herpotrichiellaceae sp(100);         |
| Otu02370 | k                                                                                                                              | Fungi(100);p | Ascomycota(100);c         | Sordariomycetes(100);o                                                                        | Hypocreales(100);f                  | Nectriaceae(100);g                                       | Fusarium(100);s                         | Fusarium sp(100);                    |
| Otu02371 | k                                                                                                                              | Fungi(100);p | Ascomycota(100);c         | Leotiomycetes(100);o                                                                          | unclassified Leotiomycetes(100);f   | unclassified Leotiomycetes(100);g                        | unclassified Leotiomycetes(100);s       | Leotiomycetes sp(100);               |
| Otu02372 | k                                                                                                                              | Fungi(100);p | Ascomycota(100);c         | Sordariomycetes(100);o                                                                        | Hypocreales(100);f                  | unclassified Hypocreales(100);g                          | unclassified Hypocreales(100);s         | Hypocreales sp(100);                 |
| Otu02373 | k                                                                                                                              | Fungi(100);p | Ascomycota(100);c         | Leotiomycetes(100);o                                                                          | Rhytismatales(100);f                | Rhytismataceae(100);g                                    | Colpoma(100);s                          | Colpoma sp(100);                     |
| Otu02374 | unclassified(100);unclassified(100);unclassified(100);unclassified(100);unclassified(100);unclassified(100);unclassified(100); |              |                           |                                                                                               |                                     |                                                          |                                         |                                      |
| Otu02375 | unknown(100);unclassified(100);unclassified(100);unclassified(100);unclassified(100);unclassified(100);unclassified(100);      |              |                           |                                                                                               |                                     |                                                          |                                         |                                      |
| Otu02376 | k                                                                                                                              | Fungi(100);p | Ascomycota(100);c         | Leotiomycetes(100);o                                                                          | Helotiales(100);f                   | unclassified Helotiales(100);g                           | unclassified Helotiales(100);s          | Helotiales sp(100);                  |
| Otu02378 | k                                                                                                                              | Fungi(100);p | unclassified Fungi(100);c | unclassified Fungi(100);o                                                                     | unclassified Fungi(100);f           | unclassified Fungi(100);g                                | unclassified Fungi(100);s               | Fungi sp(100);                       |
| Otu02379 | k                                                                                                                              | Fungi(100);p | Ascomycota(100);c         | unclassified Ascomycota(100);o                                                                | unclassified Ascomycota(100);f      | unclassified Ascomycota(100);g                           | unclassified Ascomycota(100);s          | Ascomycota sp(100);                  |
| Otu02380 | k                                                                                                                              | Fungi(100);p | Basidiomycota(100);c      | Tremellomycetes(100);o                                                                        | unclassified Tremellomycetes(100);f | unclassified Tremellomycetes(100);g                      | unclassified Tremellomycetes(100);s     | Tremellomycetes sp(100);             |
| Otu02381 | k                                                                                                                              | Fungi(100);p | Ascomycota(100);c         | Dothideomycetes(100);unclassified(100);unclassified(100);unclassified(100);unclassified(100); |                                     |                                                          |                                         |                                      |
