# Supplementary material for: Interactions between soil- and dead wood-inhabiting fungal communities during the decay of Norway spruce logs
Source: PubMed Central journal article supplement — ISME J. 2017 Apr 21;11(9):1964–74. doi: 10.1038/ismej.2017.57 (PMC5563949; doi:10.1038/ismej.2017.57), 2017-04-21
Supplement: ismej201757x2.pdf [file ismej201757x2.pdf]

Supplementary 1  
 Taxonomy and Abundance of OTUs (see taxonomy of OTUs in Table S1A)  
 Normalized data, identification according to blast UNITEv7

| OtuID    | Tot.Seqs No | Wood_1 | Wood_2 | Wood_3 | Wood_4 | Wood_5 | Soil_5 | Soil_4 | Soil_3 | Soil_2 | Soil_1 | Soil_Background |                | Soil_Managed forest stands |            |           |   |   |
|----------|-------------|--------|--------|--------|--------|--------|--------|--------|--------|--------|--------|-----------------|----------------|----------------------------|------------|-----------|---|---|
|          |             |        |        |        |        |        |        |        |        |        |        | Unmanaged       | Lintumetsäntie | Nikkilä                    | Nummenkylä | Rörstrand |   |   |
| Otu00001 | 5525        | 862    | 2197   | 2394   | 72     | 0      | 0      | 0      | 0      | 0      | 0      | 0               | 0              | 0                          | 0          | 0         | 0 | 0 |
| Otu00002 | 9747        | 2      | 0      | 1      | 140    | 877    | 872    | 1373   | 2541   | 1621   | 1624   | 398             | 160            | 30                         | 10         | 98        |   |   |
| Otu00003 | 4384        | 1229   | 1876   | 1108   | 122    | 42     | 0      | 4      | 1      | 2      | 0      | 0               | 0              | 0                          | 0          | 0         | 0 | 0 |
| Otu00004 | 2978        | 1323   | 360    | 985    | 310    | 0      | 0      | 0      | 0      | 0      | 0      | 0               | 0              | 0                          | 0          | 0         | 0 | 0 |
| Otu00005 | 3617        | 0      | 0      | 0      | 238    | 822    | 417    | 379    | 686    | 389    | 445    | 136             | 10             | 25                         | 59         | 11        |   |   |
| Otu00006 | 2008        | 941    | 469    | 577    | 7      | 14     | 0      | 0      | 0      | 0      | 0      | 0               | 0              | 0                          | 0          | 0         | 0 | 0 |
| Otu00007 | 469         | 164    | 305    | 0      | 0      | 0      | 0      | 0      | 0      | 0      | 0      | 0               | 0              | 0                          | 0          | 0         | 0 | 0 |
| Otu00008 | 599         | 0      | 0      | 0      | 583    | 0      | 0      | 14     | 0      | 0      | 0      | 2               | 0              | 0                          | 0          | 0         | 0 | 0 |
| Otu00009 | 1857        | 0      | 0      | 6      | 7      | 60     | 318    | 344    | 197    | 381    | 229    | 82              | 25             | 106                        | 89         | 13        |   |   |
| Otu00010 | 1625        | 0      | 253    | 541    | 522    | 284    | 3      | 5      | 2      | 14     | 0      | 1               | 0              | 0                          | 0          | 0         | 0 | 0 |
| Otu00011 | 3213        | 0      | 0      | 0      | 11     | 83     | 338    | 483    | 502    | 844    | 666    | 123             | 103            | 0                          | 0          | 60        |   |   |
| Otu00012 | 1547        | 0      | 561    | 325    | 577    | 0      | 0      | 1      | 21     | 61     | 1      | 0               | 0              | 0                          | 0          | 0         | 0 | 0 |
| Otu00013 | 832         | 0      | 296    | 172    | 329    | 15     | 1      | 0      | 0      | 18     | 0      | 1               | 0              | 0                          | 0          | 0         | 0 | 0 |
| Otu00014 | 964         | 138    | 498    | 328    | 0      | 0      | 0      | 0      | 0      | 0      | 0      | 0               | 0              | 0                          | 0          | 0         | 0 | 0 |
| Otu00015 | 1118        | 0      | 42     | 0      | 878    | 138    | 4      | 10     | 10     | 28     | 8      | 0               | 0              | 0                          | 0          | 0         | 0 | 0 |
| Otu00016 | 19          | 0      | 0      | 0      | 18     | 0      | 0      | 1      | 0      | 0      | 0      | 0               | 0              | 0                          | 0          | 0         | 0 | 0 |
| Otu00017 | 2141        | 1      | 0      | 0      | 0      | 955    | 564    | 0      | 271    | 63     | 6      | 222             | 0              | 0                          | 0          | 59        |   |   |
| Otu00018 | 595         | 0      | 0      | 0      | 1      | 7      | 112    | 155    | 60     | 191    | 26     | 32              | 5              | 0                          | 0          | 6         |   |   |
| Otu00019 | 755         | 160    | 121    | 241    | 216    | 17     | 0      | 0      | 0      | 0      | 0      | 0               | 0              | 0                          | 0          | 0         | 0 | 0 |
| Otu00020 | 604         | 14     | 427    | 162    | 0      | 1      | 0      | 0      | 0      | 0      | 0      | 0               | 0              | 0                          | 0          | 0         | 0 | 0 |
| Otu00021 | 536         | 0      | 0      | 521    | 0      | 1      | 1      | 0      | 12     | 0      | 0      | 1               | 0              | 0                          | 0          | 0         | 0 | 0 |
| Otu00022 | 1070        | 321    | 226    | 505    | 18     | 0      | 0      | 0      | 0      | 0      | 0      | 0               | 0              | 0                          | 0          | 0         | 0 | 0 |
| Otu00023 | 9           | 0      | 0      | 0      | 4      | 0      | 0      | 5      | 0      | 0      | 0      | 0               | 0              | 0                          | 0          | 0         | 0 | 0 |
| Otu00024 | 1712        | 0      | 0      | 0      | 2      | 67     | 68     | 421    | 426    | 397    | 212    | 93              | 7              | 18                         | 0          | 1         |   |   |
| Otu00025 | 1578        | 0      | 0      | 0      | 0      | 78     | 156    | 40     | 86     | 452    | 403    | 231             | 0              | 82                         | 0          | 50        |   |   |
| Otu00026 | 336         | 336    | 0      | 0      | 0      | 0      | 0      | 0      | 0      | 0      | 0      | 0               | 0              | 0                          | 0          | 0         | 0 | 0 |
| Otu00027 | 289         | 138    | 151    | 0      | 0      | 0      | 0      | 0      | 0      | 0      | 0      | 0               | 0              | 0                          | 0          | 0         | 0 | 0 |
| Otu00028 | 561         | 0      | 0      | 0      | 0      | 56     | 37     | 43     | 186    | 143    | 16     | 48              | 0              | 15                         | 14         | 3         |   |   |
| Otu00029 | 1775        | 0      | 0      | 0      | 18     | 88     | 76     | 319    | 537    | 295    | 363    | 58              | 9              | 0                          | 0          | 12        |   |   |
| Otu00030 | 388         | 0      | 0      | 1      | 204    | 179    | 0      | 1      | 0      | 0      | 3      | 0               | 0              | 0                          | 0          | 0         | 0 | 0 |
| Otu00031 | 403         | 0      | 0      | 3      | 7      | 23     | 115    | 82     | 15     | 123    | 17     | 10              | 1              | 2                          | 0          | 5         |   |   |
| Otu00032 | 335         | 0      | 0      | 0      | 4      | 11     | 47     | 108    | 22     | 98     | 15     | 4               | 5              | 7                          | 9          | 5         |   |   |
| Otu00033 | 635         | 0      | 349    | 137    | 149    | 0      | 0      | 0      | 0      | 0      | 0      | 0               | 0              | 0                          | 0          | 0         | 0 | 0 |
| Otu00034 | 531         | 17     | 39     | 266    | 146    | 56     | 4      | 2      | 1      | 0      | 0      | 0               | 0              | 0                          | 0          | 0         | 0 | 0 |
| Otu00035 | 330         | 71     | 224    | 0      | 0      | 0      | 1      | 0      | 22     | 1      | 0      | 5               | 3              | 3                          | 0          | 0         | 0 | 0 |
| Otu00036 | 142         | 0      | 0      | 0      | 64     | 55     | 23     | 0      | 0      | 0      | 0      | 0               | 0              | 0                          | 0          | 0         | 0 | 0 |
| Otu00037 | 650         | 644    | 4      | 1      | 0      | 1      | 0      | 0      | 0      | 0      | 0      | 0               | 0              | 0                          | 0          | 0         | 0 | 0 |
| Otu00038 | 940         | 1      | 0      | 1      | 11     | 201    | 185    | 23     | 163    | 138    | 113    | 63              | 14             | 7                          | 1          | 19        |   |   |
| Otu00039 | 454         | 426    | 28     | 0      | 0      | 0      | 0      | 0      | 0      | 0      | 0      | 0               | 0              | 0                          | 0          | 0         | 0 | 0 |
| Otu00040 | 160         | 28     | 45     | 75     | 12     | 0      | 0      | 0      | 0      | 0      | 0      | 0               | 0              | 0                          | 0          | 0         | 0 | 0 |
| Otu00041 | 434         | 245    | 20     | 160    | 0      | 9      | 0      | 0      | 0      | 0      | 0      | 0               | 0              | 0                          | 0          | 0         | 0 | 0 |

Supplementary 1  
 Taxonomy and Abundance of OTUs (see taxonomy of OTUs in Table S1A)  
 Normalized data, identification according to blast UNITEv7

|          |     |     |     |     |     |     |     |     |     |     |     |     |    |    |    |    |
|----------|-----|-----|-----|-----|-----|-----|-----|-----|-----|-----|-----|-----|----|----|----|----|
| Otu00042 | 578 | 0   | 0   | 336 | 1   | 9   | 15  | 22  | 73  | 59  | 46  | 13  | 0  | 1  | 0  | 3  |
| Otu00043 | 385 | 0   | 0   | 76  | 219 | 83  | 6   | 1   | 0   | 0   | 0   | 0   | 0  | 0  | 0  | 0  |
| Otu00044 | 437 | 79  | 119 | 223 | 16  | 0   | 0   | 0   | 0   | 0   | 0   | 0   | 0  | 0  | 0  | 0  |
| Otu00045 | 809 | 0   | 0   | 0   | 0   | 96  | 388 | 59  | 34  | 70  | 14  | 109 | 5  | 0  | 0  | 34 |
| Otu00046 | 922 | 0   | 0   | 0   | 47  | 0   | 1   | 67  | 220 | 70  | 406 | 36  | 36 | 23 | 0  | 16 |
| Otu00047 | 29  | 0   | 10  | 2   | 16  | 0   | 0   | 1   | 0   | 0   | 0   | 0   | 0  | 0  | 0  | 0  |
| Otu00048 | 330 | 0   | 0   | 0   | 0   | 0   | 15  | 36  | 68  | 152 | 19  | 35  | 3  | 0  | 0  | 2  |
| Otu00049 | 92  | 0   | 15  | 38  | 39  | 0   | 0   | 0   | 0   | 0   | 0   | 0   | 0  | 0  | 0  | 0  |
| Otu00050 | 521 | 0   | 0   | 0   | 10  | 41  | 57  | 61  | 122 | 51  | 96  | 83  | 0  | 0  | 0  | 0  |
| Otu00051 | 676 | 0   | 0   | 320 | 331 | 0   | 0   | 23  | 2   | 0   | 0   | 0   | 0  | 0  | 0  | 0  |
| Otu00052 | 778 | 0   | 0   | 0   | 0   | 101 | 72  | 40  | 389 | 5   | 49  | 122 | 0  | 0  | 0  | 0  |
| Otu00053 | 289 | 175 | 74  | 33  | 0   | 0   | 0   | 0   | 2   | 2   | 2   | 0   | 0  | 1  | 0  | 0  |
| Otu00054 | 596 | 0   | 0   | 0   | 1   | 26  | 111 | 20  | 189 | 110 | 33  | 39  | 37 | 1  | 0  | 29 |
| Otu00055 | 373 | 0   | 3   | 366 | 4   | 0   | 0   | 0   | 0   | 0   | 0   | 0   | 0  | 0  | 0  | 0  |
| Otu00056 | 261 | 239 | 19  | 3   | 0   | 0   | 0   | 0   | 0   | 0   | 0   | 0   | 0  | 0  | 0  | 0  |
| Otu00057 | 23  | 3   | 16  | 0   | 1   | 0   | 0   | 0   | 1   | 2   | 0   | 0   | 0  | 0  | 0  | 0  |
| Otu00058 | 271 | 0   | 0   | 0   | 0   | 21  | 43  | 17  | 60  | 55  | 18  | 33  | 12 | 3  | 0  | 9  |
| Otu00059 | 693 | 0   | 0   | 0   | 1   | 21  | 83  | 65  | 169 | 160 | 129 | 30  | 14 | 1  | 0  | 20 |
| Otu00060 | 665 | 0   | 0   | 0   | 0   | 20  | 25  | 282 | 224 | 0   | 2   | 101 | 8  | 3  | 0  | 0  |
| Otu00061 | 675 | 0   | 0   | 0   | 0   | 31  | 81  | 92  | 214 | 47  | 166 | 33  | 4  | 0  | 0  | 7  |
| Otu00062 | 188 | 0   | 0   | 0   | 188 | 0   | 0   | 0   | 0   | 0   | 0   | 0   | 0  | 0  | 0  | 0  |
| Otu00063 | 314 | 0   | 0   | 0   | 120 | 103 | 1   | 55  | 26  | 0   | 9   | 0   | 0  | 0  | 0  | 0  |
| Otu00064 | 207 | 0   | 0   | 0   | 0   | 1   | 44  | 4   | 16  | 81  | 17  | 27  | 3  | 9  | 0  | 5  |
| Otu00065 | 311 | 0   | 0   | 127 | 34  | 133 | 5   | 0   | 10  | 1   | 1   | 0   | 0  | 0  | 0  | 0  |
| Otu00066 | 179 | 0   | 16  | 48  | 48  | 47  | 10  | 5   | 5   | 0   | 0   | 0   | 0  | 0  | 0  | 0  |
| Otu00067 | 537 | 0   | 0   | 0   | 0   | 18  | 59  | 120 | 36  | 88  | 188 | 28  | 0  | 0  | 0  | 0  |
| Otu00068 | 134 | 41  | 84  | 2   | 7   | 0   | 0   | 0   | 0   | 0   | 0   | 0   | 0  | 0  | 0  | 0  |
| Otu00069 | 184 | 0   | 0   | 164 | 16  | 0   | 0   | 2   | 2   | 0   | 0   | 0   | 0  | 0  | 0  | 0  |
| Otu00070 | 147 | 5   | 26  | 60  | 53  | 1   | 0   | 2   | 0   | 0   | 0   | 0   | 0  | 0  | 0  | 0  |
| Otu00071 | 341 | 0   | 0   | 0   | 0   | 1   | 65  | 96  | 44  | 64  | 27  | 24  | 2  | 3  | 11 | 4  |
| Otu00072 | 59  | 0   | 0   | 0   | 0   | 0   | 1   | 47  | 1   | 0   | 0   | 0   | 0  | 10 | 0  | 0  |
| Otu00073 | 34  | 0   | 0   | 5   | 29  | 0   | 0   | 0   | 0   | 0   | 0   | 0   | 0  | 0  | 0  | 0  |
| Otu00074 | 215 | 80  | 69  | 59  | 2   | 1   | 0   | 0   | 3   | 0   | 0   | 0   | 0  | 0  | 0  | 1  |
| Otu00075 | 98  | 0   | 0   | 0   | 98  | 0   | 0   | 0   | 0   | 0   | 0   | 0   | 0  | 0  | 0  | 0  |
| Otu00076 | 68  | 45  | 23  | 0   | 0   | 0   | 0   | 0   | 0   | 0   | 0   | 0   | 0  | 0  | 0  | 0  |
| Otu00077 | 4   | 0   | 4   | 0   | 0   | 0   | 0   | 0   | 0   | 0   | 0   | 0   | 0  | 0  | 0  | 0  |
| Otu00078 | 321 | 0   | 0   | 6   | 315 | 0   | 0   | 0   | 0   | 0   | 0   | 0   | 0  | 0  | 0  | 0  |
| Otu00079 | 445 | 0   | 0   | 0   | 5   | 28  | 88  | 48  | 93  | 83  | 39  | 33  | 10 | 7  | 3  | 8  |
| Otu00080 | 366 | 0   | 0   | 0   | 0   | 11  | 146 | 49  | 41  | 32  | 10  | 11  | 0  | 18 | 43 | 5  |
| Otu00081 | 453 | 0   | 0   | 0   | 0   | 23  | 55  | 34  | 104 | 134 | 51  | 15  | 29 | 0  | 0  | 8  |
| Otu00082 | 148 | 0   | 0   | 77  | 69  | 0   | 0   | 1   | 0   | 0   | 1   | 0   | 0  | 0  | 0  | 0  |
| Otu00083 | 418 | 0   | 0   | 1   | 5   | 112 | 85  | 25  | 30  | 31  | 73  | 3   | 1  | 1  | 32 | 19 |
| Otu00084 | 54  | 0   | 36  | 1   | 17  | 0   | 0   | 0   | 0   | 0   | 0   | 0   | 0  | 0  | 0  | 0  |

Supplementary 1  
 Taxonomy and Abundance of OTUs (see taxonomy of OTUs in Table S1A)  
 Normalized data, identification according to blast UNITEv7

|          |     |     |     |     |     |     |    |    |     |     |     |    |    |    |    |    |
|----------|-----|-----|-----|-----|-----|-----|----|----|-----|-----|-----|----|----|----|----|----|
| Otu00085 | 266 | 0   | 0   | 0   | 4   | 15  | 59 | 23 | 43  | 47  | 31  | 12 | 11 | 10 | 6  | 5  |
| Otu00086 | 345 | 2   | 3   | 10  | 2   | 52  | 29 | 26 | 79  | 81  | 34  | 20 | 3  | 3  | 0  | 1  |
| Otu00087 | 357 | 0   | 0   | 0   | 0   | 1   | 13 | 94 | 90  | 30  | 39  | 61 | 0  | 2  | 16 | 11 |
| Otu00088 | 179 | 0   | 0   | 0   | 0   | 0   | 0  | 55 | 82  | 0   | 0   | 42 | 0  | 0  | 0  | 0  |
| Otu00089 | 207 | 0   | 0   | 207 | 0   | 0   | 0  | 0  | 0   | 0   | 0   | 0  | 0  | 0  | 0  | 0  |
| Otu00090 | 343 | 0   | 0   | 0   | 13  | 108 | 65 | 35 | 52  | 34  | 21  | 8  | 1  | 5  | 0  | 1  |
| Otu00091 | 31  | 2   | 13  | 15  | 1   | 0   | 0  | 0  | 0   | 0   | 0   | 0  | 0  | 0  | 0  | 0  |
| Otu00092 | 173 | 0   | 2   | 66  | 35  | 48  | 10 | 3  | 3   | 4   | 2   | 0  | 0  | 0  | 0  | 0  |
| Otu00093 | 390 | 0   | 0   | 0   | 1   | 19  | 12 | 51 | 98  | 122 | 66  | 13 | 4  | 1  | 1  | 2  |
| Otu00094 | 393 | 0   | 0   | 0   | 0   | 0   | 12 | 60 | 144 | 42  | 69  | 52 | 14 | 0  | 0  | 0  |
| Otu00095 | 449 | 0   | 0   | 0   | 0   | 18  | 39 | 43 | 117 | 37  | 161 | 17 | 3  | 14 | 0  | 0  |
| Otu00096 | 350 | 0   | 0   | 0   | 0   | 10  | 81 | 16 | 89  | 14  | 55  | 42 | 27 | 2  | 3  | 11 |
| Otu00097 | 94  | 0   | 0   | 0   | 0   | 0   | 0  | 48 | 8   | 35  | 0   | 0  | 0  | 2  | 1  | 0  |
| Otu00098 | 276 | 0   | 0   | 203 | 73  | 0   | 0  | 0  | 0   | 0   | 0   | 0  | 0  | 0  | 0  | 0  |
| Otu00099 | 213 | 28  | 155 | 27  | 3   | 0   | 0  | 0  | 0   | 0   | 0   | 0  | 0  | 0  | 0  | 0  |
| Otu00100 | 165 | 0   | 0   | 124 | 28  | 11  | 0  | 0  | 0   | 0   | 2   | 0  | 0  | 0  | 0  | 0  |
| Otu00101 | 108 | 0   | 0   | 0   | 5   | 12  | 50 | 1  | 7   | 27  | 5   | 1  | 0  | 0  | 0  | 0  |
| Otu00102 | 241 | 0   | 0   | 0   | 1   | 9   | 57 | 13 | 43  | 54  | 28  | 12 | 1  | 14 | 8  | 1  |
| Otu00103 | 90  | 0   | 0   | 0   | 0   | 15  | 5  | 2  | 7   | 42  | 5   | 4  | 2  | 2  | 1  | 5  |
| Otu00104 | 96  | 17  | 45  | 3   | 9   | 12  | 0  | 0  | 3   | 4   | 0   | 3  | 0  | 0  | 0  | 0  |
| Otu00106 | 84  | 0   | 84  | 0   | 0   | 0   | 0  | 0  | 0   | 0   | 0   | 0  | 0  | 0  | 0  | 0  |
| Otu00107 | 119 | 0   | 0   | 7   | 112 | 0   | 0  | 0  | 0   | 0   | 0   | 0  | 0  | 0  | 0  | 0  |
| Otu00108 | 66  | 37  | 29  | 0   | 0   | 0   | 0  | 0  | 0   | 0   | 0   | 0  | 0  | 0  | 0  | 0  |
| Otu00109 | 196 | 0   | 0   | 14  | 31  | 138 | 5  | 0  | 7   | 0   | 1   | 0  | 0  | 0  | 0  | 0  |
| Otu00110 | 199 | 0   | 0   | 0   | 11  | 73  | 45 | 5  | 25  | 15  | 8   | 13 | 3  | 0  | 0  | 1  |
| Otu00111 | 153 | 132 | 12  | 8   | 1   | 0   | 0  | 0  | 0   | 0   | 0   | 0  | 0  | 0  | 0  | 0  |
| Otu00112 | 31  | 3   | 13  | 15  | 0   | 0   | 0  | 0  | 0   | 0   | 0   | 0  | 0  | 0  | 0  | 0  |
| Otu00113 | 47  | 0   | 2   | 0   | 45  | 0   | 0  | 0  | 0   | 0   | 0   | 0  | 0  | 0  | 0  | 0  |
| Otu00115 | 304 | 0   | 0   | 0   | 0   | 16  | 64 | 33 | 40  | 18  | 87  | 38 | 2  | 3  | 0  | 3  |
| Otu00116 | 205 | 13  | 18  | 38  | 4   | 106 | 9  | 0  | 3   | 3   | 11  | 0  | 0  | 0  | 0  | 0  |
| Otu00117 | 208 | 0   | 0   | 170 | 38  | 0   | 0  | 0  | 0   | 0   | 0   | 0  | 0  | 0  | 0  | 0  |
| Otu00118 | 320 | 0   | 0   | 0   | 0   | 229 | 19 | 2  | 28  | 6   | 2   | 26 | 7  | 0  | 0  | 1  |
| Otu00119 | 243 | 0   | 0   | 68  | 175 | 0   | 0  | 0  | 0   | 0   | 0   | 0  | 0  | 0  | 0  | 0  |
| Otu00120 | 352 | 0   | 0   | 0   | 0   | 5   | 46 | 65 | 71  | 40  | 105 | 9  | 7  | 1  | 0  | 3  |
| Otu00121 | 288 | 0   | 1   | 1   | 4   | 16  | 47 | 54 | 65  | 43  | 29  | 20 | 5  | 2  | 0  | 1  |
| Otu00122 | 121 | 0   | 4   | 60  | 8   | 40  | 2  | 1  | 3   | 1   | 1   | 1  | 0  | 0  | 0  | 0  |
| Otu00123 | 331 | 0   | 0   | 0   | 0   | 18  | 73 | 80 | 24  | 52  | 46  | 33 | 2  | 0  | 0  | 3  |
| Otu00124 | 198 | 0   | 0   | 0   | 0   | 106 | 78 | 0  | 0   | 0   | 0   | 14 | 0  | 0  | 0  | 0  |
| Otu00125 | 136 | 0   | 0   | 0   | 0   | 0   | 0  | 0  | 1   | 0   | 0   | 0  | 0  | 54 | 81 | 0  |
| Otu00126 | 229 | 0   | 0   | 0   | 0   | 1   | 80 | 29 | 32  | 40  | 26  | 14 | 1  | 2  | 2  | 2  |
| Otu00127 | 179 | 0   | 0   | 0   | 0   | 1   | 41 | 5  | 23  | 18  | 0   | 18 | 0  | 56 | 17 | 0  |
| Otu00128 | 211 | 0   | 0   | 0   | 0   | 0   | 0  | 86 | 48  | 0   | 0   | 0  | 0  | 77 | 0  | 0  |
| Otu00129 | 244 | 0   | 0   | 0   | 0   | 19  | 30 | 21 | 58  | 44  | 40  | 28 | 3  | 0  | 0  | 1  |

Supplementary 1  
 Taxonomy and Abundance of OTUs (see taxonomy of OTUs in Table S1A)  
 Normalized data, identification according to blast UNITEv7

|          |     |     |     |     |    |     |    |     |    |     |     |    |    |    |    |    |
|----------|-----|-----|-----|-----|----|-----|----|-----|----|-----|-----|----|----|----|----|----|
| Otu00130 | 286 | 0   | 0   | 0   | 0  | 15  | 5  | 38  | 7  | 173 | 10  | 12 | 23 | 0  | 1  | 2  |
| Otu00131 | 114 | 0   | 0   | 112 | 1  | 0   | 0  | 0   | 0  | 1   | 0   | 0  | 0  | 0  | 0  | 0  |
| Otu00132 | 121 | 0   | 0   | 89  | 32 | 0   | 0  | 0   | 0  | 0   | 0   | 0  | 0  | 0  | 0  | 0  |
| Otu00133 | 231 | 0   | 0   | 0   | 2  | 52  | 17 | 6   | 24 | 66  | 10  | 37 | 7  | 2  | 2  | 6  |
| Otu00135 | 149 | 0   | 0   | 0   | 0  | 4   | 24 | 3   | 18 | 34  | 19  | 18 | 2  | 8  | 15 | 4  |
| Otu00136 | 312 | 0   | 0   | 0   | 0  | 218 | 46 | 29  | 18 | 1   | 0   | 0  | 0  | 0  | 0  | 0  |
| Otu00137 | 233 | 0   | 0   | 7   | 0  | 226 | 0  | 0   | 0  | 0   | 0   | 0  | 0  | 0  | 0  | 0  |
| Otu00138 | 112 | 0   | 42  | 0   | 0  | 0   | 0  | 1   | 0  | 63  | 5   | 1  | 0  | 0  | 0  | 0  |
| Otu00139 | 130 | 0   | 0   | 0   | 0  | 1   | 38 | 0   | 2  | 13  | 1   | 41 | 0  | 0  | 0  | 34 |
| Otu00140 | 47  | 0   | 47  | 0   | 0  | 0   | 0  | 0   | 0  | 0   | 0   | 0  | 0  | 0  | 0  | 0  |
| Otu00141 | 228 | 0   | 0   | 0   | 0  | 1   | 23 | 104 | 31 | 35  | 22  | 12 | 0  | 0  | 0  | 0  |
| Otu00142 | 4   | 0   | 0   | 0   | 4  | 0   | 0  | 0   | 0  | 0   | 0   | 0  | 0  | 0  | 0  | 0  |
| Otu00143 | 117 | 15  | 37  | 36  | 2  | 5   | 1  | 5   | 9  | 4   | 3   | 0  | 0  | 0  | 0  | 0  |
| Otu00144 | 121 | 46  | 23  | 25  | 16 | 9   | 0  | 0   | 2  | 0   | 0   | 0  | 0  | 0  | 0  | 0  |
| Otu00145 | 47  | 0   | 11  | 30  | 4  | 2   | 0  | 0   | 0  | 0   | 0   | 0  | 0  | 0  | 0  | 0  |
| Otu00146 | 243 | 0   | 0   | 0   | 0  | 46  | 54 | 0   | 2  | 63  | 47  | 9  | 0  | 22 | 0  | 0  |
| Otu00147 | 39  | 0   | 0   | 12  | 25 | 1   | 0  | 0   | 1  | 0   | 0   | 0  | 0  | 0  | 0  | 0  |
| Otu00148 | 191 | 0   | 191 | 0   | 0  | 0   | 0  | 0   | 0  | 0   | 0   | 0  | 0  | 0  | 0  | 0  |
| Otu00149 | 14  | 0   | 7   | 3   | 1  | 3   | 0  | 0   | 0  | 0   | 0   | 0  | 0  | 0  | 0  | 0  |
| Otu00150 | 36  | 36  | 0   | 0   | 0  | 0   | 0  | 0   | 0  | 0   | 0   | 0  | 0  | 0  | 0  | 0  |
| Otu00151 | 198 | 0   | 0   | 0   | 0  | 15  | 12 | 32  | 50 | 35  | 23  | 15 | 16 | 0  | 0  | 0  |
| Otu00152 | 58  | 1   | 25  | 17  | 8  | 5   | 1  | 0   | 0  | 1   | 0   | 0  | 0  | 0  | 0  | 0  |
| Otu00153 | 76  | 0   | 0   | 38  | 30 | 4   | 0  | 1   | 3  | 0   | 0   | 0  | 0  | 0  | 0  | 0  |
| Otu00154 | 109 | 0   | 16  | 52  | 2  | 3   | 0  | 36  | 0  | 0   | 0   | 0  | 0  | 0  | 0  | 0  |
| Otu00155 | 121 | 0   | 35  | 0   | 2  | 7   | 27 | 9   | 17 | 12  | 11  | 1  | 0  | 0  | 0  | 0  |
| Otu00156 | 86  | 0   | 0   | 0   | 3  | 0   | 0  | 62  | 11 | 6   | 0   | 4  | 0  | 0  | 0  | 0  |
| Otu00157 | 173 | 0   | 0   | 0   | 0  | 32  | 12 | 32  | 70 | 0   | 0   | 27 | 0  | 0  | 0  | 0  |
| Otu00158 | 64  | 0   | 6   | 0   | 10 | 20  | 3  | 18  | 1  | 4   | 0   | 1  | 1  | 0  | 0  | 0  |
| Otu00159 | 55  | 0   | 0   | 0   | 0  | 10  | 8  | 1   | 3  | 21  | 6   | 4  | 1  | 0  | 0  | 1  |
| Otu00160 | 7   | 0   | 2   | 2   | 0  | 1   | 0  | 2   | 0  | 0   | 0   | 0  | 0  | 0  | 0  | 0  |
| Otu00161 | 53  | 0   | 0   | 0   | 1  | 6   | 11 | 1   | 0  | 30  | 0   | 4  | 0  | 0  | 0  | 0  |
| Otu00162 | 94  | 0   | 0   | 93  | 1  | 0   | 0  | 0   | 0  | 0   | 0   | 0  | 0  | 0  | 0  | 0  |
| Otu00163 | 85  | 0   | 0   | 1   | 48 | 28  | 8  | 0   | 0  | 0   | 0   | 0  | 0  | 0  | 0  | 0  |
| Otu00164 | 226 | 0   | 0   | 0   | 3  | 13  | 13 | 38  | 40 | 55  | 55  | 4  | 0  | 1  | 4  | 0  |
| Otu00165 | 77  | 0   | 0   | 0   | 77 | 0   | 0  | 0   | 0  | 0   | 0   | 0  | 0  | 0  | 0  | 0  |
| Otu00166 | 217 | 0   | 0   | 0   | 0  | 11  | 8  | 33  | 42 | 58  | 50  | 12 | 2  | 1  | 0  | 0  |
| Otu00167 | 136 | 135 | 0   | 0   | 0  | 0   | 0  | 0   | 0  | 0   | 1   | 0  | 0  | 0  | 0  | 0  |
| Otu00168 | 189 | 0   | 0   | 0   | 1  | 5   | 5  | 40  | 34 | 71  | 25  | 3  | 4  | 1  | 0  | 0  |
| Otu00169 | 137 | 0   | 0   | 0   | 61 | 0   | 10 | 0   | 64 | 0   | 0   | 1  | 0  | 1  | 0  | 0  |
| Otu00170 | 99  | 0   | 0   | 76  | 23 | 0   | 0  | 0   | 0  | 0   | 0   | 0  | 0  | 0  | 0  | 0  |
| Otu00171 | 57  | 11  | 20  | 21  | 5  | 0   | 0  | 0   | 0  | 0   | 0   | 0  | 0  | 0  | 0  | 0  |
| Otu00172 | 204 | 0   | 0   | 0   | 0  | 3   | 22 | 3   | 19 | 23  | 114 | 5  | 0  | 1  | 14 | 0  |
| Otu00173 | 147 | 0   | 69  | 71  | 3  | 0   | 0  | 0   | 3  | 0   | 0   | 0  | 1  | 0  | 0  | 0  |

Supplementary 1  
 Taxonomy and Abundance of OTUs (see taxonomy of OTUs in Table S1A)  
 Normalized data, identification according to blast UNITEv7

|          |     |    |     |    |    |    |     |    |     |    |     |    |    |    |    |    |
|----------|-----|----|-----|----|----|----|-----|----|-----|----|-----|----|----|----|----|----|
| Otu00174 | 209 | 0  | 0   | 0  | 0  | 0  | 0   | 58 | 42  | 15 | 58  | 35 | 0  | 1  | 0  | 0  |
| Otu00175 | 108 | 1  | 1   | 2  | 1  | 6  | 6   | 9  | 37  | 13 | 6   | 9  | 12 | 3  | 0  | 2  |
| Otu00176 | 111 | 0  | 0   | 0  | 0  | 5  | 20  | 6  | 7   | 21 | 2   | 48 | 1  | 0  | 0  | 1  |
| Otu00177 | 134 | 0  | 0   | 0  | 0  | 1  | 28  | 1  | 18  | 16 | 13  | 8  | 2  | 29 | 17 | 1  |
| Otu00178 | 217 | 0  | 0   | 0  | 0  | 0  | 1   | 2  | 205 | 0  | 0   | 0  | 0  | 9  | 0  | 0  |
| Otu00179 | 56  | 0  | 0   | 0  | 54 | 0  | 0   | 0  | 1   | 0  | 0   | 0  | 0  | 0  | 1  | 0  |
| Otu00180 | 183 | 0  | 0   | 0  | 0  | 0  | 17  | 2  | 126 | 5  | 3   | 7  | 0  | 0  | 0  | 23 |
| Otu00181 | 100 | 0  | 0   | 55 | 4  | 41 | 0   | 0  | 0   | 0  | 0   | 0  | 0  | 0  | 0  | 0  |
| Otu00182 | 29  | 0  | 27  | 0  | 0  | 0  | 0   | 0  | 1   | 1  | 0   | 0  | 0  | 0  | 0  | 0  |
| Otu00183 | 92  | 0  | 0   | 23 | 45 | 9  | 1   | 3  | 9   | 0  | 2   | 0  | 0  | 0  | 0  | 0  |
| Otu00184 | 170 | 0  | 0   | 0  | 0  | 4  | 78  | 6  | 36  | 20 | 19  | 4  | 3  | 0  | 0  | 0  |
| Otu00185 | 125 | 0  | 0   | 0  | 0  | 38 | 38  | 4  | 10  | 3  | 8   | 24 | 0  | 0  | 0  | 0  |
| Otu00186 | 108 | 0  | 0   | 49 | 59 | 0  | 0   | 0  | 0   | 0  | 0   | 0  | 0  | 0  | 0  | 0  |
| Otu00187 | 111 | 0  | 0   | 0  | 0  | 10 | 46  | 18 | 19  | 1  | 0   | 16 | 1  | 0  | 0  | 0  |
| Otu00188 | 182 | 0  | 0   | 0  | 0  | 11 | 13  | 20 | 30  | 58 | 47  | 3  | 0  | 0  | 0  | 0  |
| Otu00189 | 186 | 0  | 0   | 0  | 0  | 0  | 11  | 1  | 128 | 1  | 21  | 13 | 0  | 0  | 11 | 0  |
| Otu00190 | 16  | 0  | 15  | 0  | 1  | 0  | 0   | 0  | 0   | 0  | 0   | 0  | 0  | 0  | 0  | 0  |
| Otu00191 | 158 | 0  | 0   | 0  | 3  | 0  | 8   | 24 | 13  | 41 | 61  | 5  | 0  | 3  | 0  | 0  |
| Otu00192 | 59  | 0  | 0   | 0  | 0  | 15 | 5   | 16 | 6   | 7  | 6   | 2  | 1  | 0  | 0  | 1  |
| Otu00193 | 61  | 0  | 0   | 40 | 20 | 1  | 0   | 0  | 0   | 0  | 0   | 0  | 0  | 0  | 0  | 0  |
| Otu00194 | 66  | 0  | 0   | 6  | 53 | 5  | 0   | 0  | 2   | 0  | 0   | 0  | 0  | 0  | 0  | 0  |
| Otu00195 | 57  | 0  | 0   | 0  | 2  | 41 | 0   | 0  | 0   | 7  | 7   | 0  | 0  | 0  | 0  | 0  |
| Otu00196 | 153 | 0  | 0   | 0  | 0  | 30 | 2   | 11 | 51  | 35 | 11  | 11 | 0  | 0  | 0  | 2  |
| Otu00197 | 51  | 0  | 0   | 0  | 0  | 6  | 19  | 15 | 1   | 4  | 5   | 0  | 0  | 0  | 0  | 1  |
| Otu00198 | 56  | 30 | 9   | 15 | 1  | 1  | 0   | 0  | 0   | 0  | 0   | 0  | 0  | 0  | 0  | 0  |
| Otu00199 | 31  | 0  | 0   | 0  | 1  | 0  | 7   | 23 | 0   | 0  | 0   | 0  | 0  | 0  | 0  | 0  |
| Otu00200 | 48  | 0  | 12  | 22 | 14 | 0  | 0   | 0  | 0   | 0  | 0   | 0  | 0  | 0  | 0  | 0  |
| Otu00201 | 36  | 0  | 0   | 1  | 32 | 3  | 0   | 0  | 0   | 0  | 0   | 0  | 0  | 0  | 0  | 0  |
| Otu00202 | 108 | 0  | 1   | 0  | 1  | 38 | 6   | 9  | 19  | 9  | 8   | 16 | 0  | 0  | 0  | 1  |
| Otu00203 | 127 | 0  | 0   | 0  | 1  | 82 | 5   | 1  | 12  | 11 | 8   | 4  | 0  | 2  | 0  | 1  |
| Otu00204 | 24  | 0  | 2   | 0  | 11 | 0  | 0   | 8  | 1   | 0  | 2   | 0  | 0  | 0  | 0  | 0  |
| Otu00205 | 13  | 0  | 0   | 0  | 9  | 1  | 0   | 0  | 0   | 3  | 0   | 0  | 0  | 0  | 0  | 0  |
| Otu00206 | 152 | 0  | 0   | 0  | 0  | 1  | 29  | 3  | 40  | 23 | 24  | 9  | 3  | 15 | 5  | 0  |
| Otu00207 | 16  | 7  | 0   | 0  | 6  | 2  | 1   | 0  | 0   | 0  | 0   | 0  | 0  | 0  | 0  | 0  |
| Otu00208 | 127 | 0  | 0   | 0  | 22 | 8  | 13  | 10 | 55  | 4  | 4   | 9  | 0  | 2  | 0  | 0  |
| Otu00209 | 71  | 65 | 4   | 0  | 0  | 0  | 0   | 0  | 2   | 0  | 0   | 0  | 0  | 0  | 0  | 0  |
| Otu00210 | 142 | 0  | 0   | 0  | 2  | 3  | 6   | 23 | 17  | 54 | 16  | 18 | 3  | 0  | 0  | 0  |
| Otu00211 | 190 | 0  | 0   | 0  | 0  | 0  | 140 | 0  | 0   | 50 | 0   | 0  | 0  | 0  | 0  | 0  |
| Otu00212 | 147 | 0  | 0   | 0  | 0  | 0  | 0   | 0  | 15  | 0  | 111 | 19 | 0  | 2  | 0  | 0  |
| Otu00213 | 63  | 0  | 58  | 4  | 0  | 0  | 0   | 1  | 0   | 0  | 0   | 0  | 0  | 0  | 0  | 0  |
| Otu00214 | 137 | 0  | 0   | 0  | 1  | 4  | 6   | 17 | 38  | 11 | 31  | 10 | 2  | 8  | 7  | 2  |
| Otu00215 | 118 | 0  | 0   | 0  | 0  | 0  | 0   | 41 | 5   | 22 | 8   | 15 | 0  | 27 | 0  | 0  |
| Otu00216 | 117 | 0  | 111 | 0  | 1  | 0  | 0   | 0  | 0   | 0  | 5   | 0  | 0  | 0  | 0  | 0  |

Supplementary 1  
 Taxonomy and Abundance of OTUs (see taxonomy of OTUs in Table S1A)  
 Normalized data, identification according to blast UNITEv7

|          |     |     |    |    |    |    |     |    |    |    |    |    |    |    |    |   |
|----------|-----|-----|----|----|----|----|-----|----|----|----|----|----|----|----|----|---|
| Otu00217 | 43  | 0   | 0  | 4  | 9  | 16 | 2   | 0  | 5  | 5  | 1  | 0  | 0  | 0  | 1  | 0 |
| Otu00218 | 154 | 0   | 0  | 0  | 0  | 34 | 14  | 7  | 58 | 9  | 26 | 1  | 0  | 4  | 1  | 0 |
| Otu00219 | 132 | 0   | 0  | 0  | 1  | 62 | 32  | 1  | 9  | 13 | 8  | 2  | 4  | 0  | 0  | 0 |
| Otu00220 | 61  | 25  | 23 | 3  | 10 | 0  | 0   | 0  | 0  | 0  | 0  | 0  | 0  | 0  | 0  | 0 |
| Otu00221 | 127 | 0   | 2  | 3  | 3  | 5  | 8   | 16 | 16 | 56 | 12 | 3  | 2  | 1  | 0  | 0 |
| Otu00222 | 123 | 0   | 0  | 0  | 7  | 14 | 7   | 24 | 33 | 18 | 15 | 3  | 1  | 0  | 1  | 0 |
| Otu00223 | 40  | 0   | 0  | 0  | 0  | 0  | 0   | 12 | 28 | 0  | 0  | 0  | 0  | 0  | 0  | 0 |
| Otu00224 | 49  | 0   | 0  | 0  | 0  | 0  | 0   | 1  | 0  | 0  | 0  | 0  | 48 | 0  | 0  | 0 |
| Otu00225 | 122 | 0   | 0  | 0  | 0  | 10 | 39  | 1  | 25 | 4  | 6  | 14 | 7  | 16 | 0  | 0 |
| Otu00226 | 132 | 0   | 0  | 0  | 0  | 2  | 19  | 8  | 40 | 16 | 39 | 5  | 1  | 0  | 0  | 2 |
| Otu00227 | 140 | 0   | 0  | 0  | 0  | 3  | 7   | 33 | 41 | 20 | 14 | 18 | 3  | 1  | 0  | 0 |
| Otu00228 | 6   | 0   | 0  | 5  | 1  | 0  | 0   | 0  | 0  | 0  | 0  | 0  | 0  | 0  | 0  | 0 |
| Otu00229 | 2   | 0   | 0  | 0  | 2  | 0  | 0   | 0  | 0  | 0  | 0  | 0  | 0  | 0  | 0  | 0 |
| Otu00230 | 44  | 0   | 26 | 13 | 5  | 0  | 0   | 0  | 0  | 0  | 0  | 0  | 0  | 0  | 0  | 0 |
| Otu00231 | 110 | 0   | 0  | 0  | 0  | 6  | 22  | 16 | 15 | 18 | 11 | 11 | 11 | 0  | 0  | 0 |
| Otu00232 | 46  | 4   | 42 | 0  | 0  | 0  | 0   | 0  | 0  | 0  | 0  | 0  | 0  | 0  | 0  | 0 |
| Otu00233 | 110 | 110 | 0  | 0  | 0  | 0  | 0   | 0  | 0  | 0  | 0  | 0  | 0  | 0  | 0  | 0 |
| Otu00234 | 120 | 0   | 0  | 0  | 0  | 4  | 40  | 7  | 28 | 20 | 0  | 12 | 0  | 5  | 4  | 0 |
| Otu00235 | 89  | 0   | 0  | 0  | 1  | 16 | 6   | 8  | 19 | 20 | 12 | 3  | 4  | 0  | 0  | 0 |
| Otu00236 | 0   | 0   | 0  | 0  | 0  | 0  | 0   | 0  | 0  | 0  | 0  | 0  | 0  | 0  | 0  | 0 |
| Otu00237 | 139 | 0   | 0  | 0  | 0  | 10 | 112 | 0  | 0  | 0  | 0  | 17 | 0  | 0  | 0  | 0 |
| Otu00238 | 50  | 4   | 3  | 38 | 1  | 1  | 0   | 0  | 2  | 0  | 1  | 0  | 0  | 0  | 0  | 0 |
| Otu00239 | 152 | 0   | 0  | 0  | 0  | 2  | 149 | 1  | 0  | 0  | 0  | 0  | 0  | 0  | 0  | 0 |
| Otu00240 | 53  | 17  | 17 | 19 | 0  | 0  | 0   | 0  | 0  | 0  | 0  | 0  | 0  | 0  | 0  | 0 |
| Otu00241 | 64  | 63  | 1  | 0  | 0  | 0  | 0   | 0  | 0  | 0  | 0  | 0  | 0  | 0  | 0  | 0 |
| Otu00242 | 112 | 0   | 0  | 0  | 0  | 9  | 19  | 12 | 30 | 15 | 1  | 17 | 0  | 3  | 4  | 2 |
| Otu00243 | 40  | 0   | 40 | 0  | 0  | 0  | 0   | 0  | 0  | 0  | 0  | 0  | 0  | 0  | 0  | 0 |
| Otu00245 | 92  | 0   | 0  | 0  | 0  | 0  | 0   | 0  | 0  | 67 | 0  | 0  | 0  | 0  | 25 | 0 |
| Otu00246 | 21  | 9   | 10 | 2  | 0  | 0  | 0   | 0  | 0  | 0  | 0  | 0  | 0  | 0  | 0  | 0 |
| Otu00247 | 4   | 0   | 2  | 0  | 0  | 0  | 0   | 0  | 0  | 2  | 0  | 0  | 0  | 0  | 0  | 0 |
| Otu00248 | 57  | 0   | 0  | 0  | 0  | 0  | 0   | 0  | 0  | 0  | 0  | 0  | 57 | 0  | 0  | 0 |
| Otu00249 | 62  | 0   | 0  | 0  | 22 | 35 | 1   | 1  | 1  | 0  | 2  | 0  | 0  | 0  | 0  | 0 |
| Otu00250 | 76  | 0   | 0  | 0  | 0  | 18 | 12  | 0  | 9  | 7  | 6  | 5  | 2  | 11 | 6  | 0 |
| Otu00251 | 138 | 0   | 0  | 1  | 0  | 2  | 131 | 0  | 4  | 0  | 0  | 0  | 0  | 0  | 0  | 0 |
| Otu00252 | 99  | 0   | 0  | 0  | 0  | 4  | 13  | 18 | 21 | 24 | 7  | 5  | 1  | 3  | 1  | 2 |
| Otu00253 | 115 | 0   | 3  | 0  | 4  | 4  | 3   | 39 | 22 | 22 | 15 | 2  | 0  | 1  | 0  | 0 |
| Otu00254 | 66  | 0   | 1  | 1  | 0  | 5  | 19  | 0  | 13 | 9  | 7  | 5  | 1  | 3  | 1  | 1 |
| Otu00255 | 62  | 10  | 0  | 24 | 28 | 0  | 0   | 0  | 0  | 0  | 0  | 0  | 0  | 0  | 0  | 0 |
| Otu00256 | 79  | 0   | 0  | 0  | 0  | 35 | 4   | 2  | 8  | 3  | 6  | 12 | 2  | 5  | 0  | 2 |
| Otu00257 | 41  | 0   | 0  | 0  | 0  | 1  | 10  | 3  | 6  | 19 | 0  | 2  | 0  | 0  | 0  | 0 |
| Otu00258 | 67  | 0   | 0  | 0  | 0  | 3  | 13  | 5  | 9  | 9  | 1  | 6  | 0  | 7  | 14 | 0 |
| Otu00259 | 35  | 0   | 0  | 3  | 21 | 9  | 2   | 0  | 0  | 0  | 0  | 0  | 0  | 0  | 0  | 0 |
| Otu00260 | 22  | 0   | 0  | 0  | 0  | 1  | 5   | 0  | 8  | 2  | 3  | 1  | 1  | 1  | 0  | 0 |

Supplementary 1  
 Taxonomy and Abundance of OTUs (see taxonomy of OTUs in Table S1A)  
 Normalized data, identification according to blast UNITEv7

|          |     |    |    |    |    |    |    |    |     |    |    |    |   |    |    |   |
|----------|-----|----|----|----|----|----|----|----|-----|----|----|----|---|----|----|---|
| Otu00261 | 87  | 0  | 0  | 0  | 0  | 0  | 0  | 1  | 1   | 0  | 0  | 85 | 0 | 0  | 0  | 0 |
| Otu00262 | 57  | 0  | 0  | 0  | 2  | 31 | 3  | 7  | 7   | 4  | 1  | 1  | 1 | 0  | 0  | 0 |
| Otu00263 | 34  | 0  | 0  | 0  | 34 | 0  | 0  | 0  | 0   | 0  | 0  | 0  | 0 | 0  | 0  | 0 |
| Otu00264 | 128 | 0  | 0  | 0  | 0  | 3  | 3  | 26 | 25  | 35 | 29 | 4  | 0 | 1  | 0  | 2 |
| Otu00265 | 59  | 0  | 0  | 0  | 0  | 0  | 2  | 1  | 21  | 0  | 2  | 0  | 0 | 32 | 0  | 1 |
| Otu00267 | 36  | 34 | 0  | 1  | 0  | 1  | 0  | 0  | 0   | 0  | 0  | 0  | 0 | 0  | 0  | 0 |
| Otu00268 | 61  | 61 | 0  | 0  | 0  | 0  | 0  | 0  | 0   | 0  | 0  | 0  | 0 | 0  | 0  | 0 |
| Otu00269 | 98  | 0  | 0  | 0  | 0  | 19 | 9  | 20 | 29  | 9  | 5  | 3  | 1 | 3  | 0  | 0 |
| Otu00270 | 101 | 0  | 31 | 0  | 4  | 0  | 0  | 66 | 0   | 0  | 0  | 0  | 0 | 0  | 0  | 0 |
| Otu00271 | 95  | 0  | 0  | 0  | 0  | 2  | 48 | 5  | 9   | 13 | 13 | 1  | 3 | 1  | 0  | 0 |
| Otu00272 | 113 | 0  | 0  | 0  | 0  | 4  | 10 | 19 | 4   | 40 | 32 | 2  | 0 | 0  | 2  | 0 |
| Otu00273 | 31  | 0  | 0  | 25 | 5  | 0  | 0  | 0  | 1   | 0  | 0  | 0  | 0 | 0  | 0  | 0 |
| Otu00274 | 15  | 0  | 9  | 2  | 4  | 0  | 0  | 0  | 0   | 0  | 0  | 0  | 0 | 0  | 0  | 0 |
| Otu00275 | 92  | 0  | 0  | 0  | 1  | 7  | 0  | 45 | 5   | 9  | 18 | 1  | 3 | 3  | 0  | 0 |
| Otu00276 | 108 | 0  | 0  | 0  | 2  | 3  | 5  | 31 | 9   | 35 | 16 | 6  | 0 | 0  | 0  | 1 |
| Otu00277 | 41  | 0  | 0  | 0  | 0  | 4  | 0  | 15 | 7   | 6  | 3  | 5  | 0 | 0  | 0  | 1 |
| Otu00278 | 69  | 0  | 0  | 2  | 20 | 43 | 0  | 0  | 1   | 2  | 1  | 0  | 0 | 0  | 0  | 0 |
| Otu00279 | 3   | 0  | 0  | 0  | 3  | 0  | 0  | 0  | 0   | 0  | 0  | 0  | 0 | 0  | 0  | 0 |
| Otu00280 | 86  | 0  | 0  | 0  | 0  | 0  | 0  | 7  | 27  | 0  | 0  | 0  | 0 | 0  | 52 | 0 |
| Otu00281 | 72  | 0  | 0  | 72 | 0  | 0  | 0  | 0  | 0   | 0  | 0  | 0  | 0 | 0  | 0  | 0 |
| Otu00282 | 88  | 0  | 0  | 1  | 0  | 0  | 0  | 0  | 51  | 1  | 3  | 0  | 9 | 10 | 13 | 0 |
| Otu00283 | 45  | 0  | 0  | 41 | 2  | 1  | 1  | 0  | 0   | 0  | 0  | 0  | 0 | 0  | 0  | 0 |
| Otu00284 | 25  | 0  | 25 | 0  | 0  | 0  | 0  | 0  | 0   | 0  | 0  | 0  | 0 | 0  | 0  | 0 |
| Otu00285 | 33  | 0  | 0  | 3  | 17 | 12 | 1  | 0  | 0   | 0  | 0  | 0  | 0 | 0  | 0  | 0 |
| Otu00286 | 75  | 0  | 0  | 0  | 1  | 41 | 3  | 4  | 9   | 0  | 17 | 0  | 0 | 0  | 0  | 0 |
| Otu00287 | 77  | 0  | 0  | 77 | 0  | 0  | 0  | 0  | 0   | 0  | 0  | 0  | 0 | 0  | 0  | 0 |
| Otu00288 | 20  | 0  | 0  | 0  | 0  | 0  | 0  | 20 | 0   | 0  | 0  | 0  | 0 | 0  | 0  | 0 |
| Otu00289 | 1   | 0  | 1  | 0  | 0  | 0  | 0  | 0  | 0   | 0  | 0  | 0  | 0 | 0  | 0  | 0 |
| Otu00290 | 82  | 81 | 1  | 0  | 0  | 0  | 0  | 0  | 0   | 0  | 0  | 0  | 0 | 0  | 0  | 0 |
| Otu00291 | 54  | 0  | 0  | 0  | 52 | 2  | 0  | 0  | 0   | 0  | 0  | 0  | 0 | 0  | 0  | 0 |
| Otu00292 | 58  | 0  | 0  | 0  | 0  | 2  | 11 | 2  | 13  | 11 | 2  | 9  | 4 | 0  | 0  | 4 |
| Otu00293 | 99  | 0  | 0  | 0  | 0  | 1  | 9  | 11 | 39  | 24 | 9  | 4  | 1 | 0  | 0  | 1 |
| Otu00294 | 43  | 0  | 0  | 29 | 10 | 4  | 0  | 0  | 0   | 0  | 0  | 0  | 0 | 0  | 0  | 0 |
| Otu00295 | 64  | 0  | 0  | 7  | 5  | 12 | 3  | 1  | 7   | 15 | 7  | 3  | 1 | 3  | 0  | 0 |
| Otu00296 | 33  | 0  | 9  | 12 | 4  | 2  | 1  | 5  | 0   | 0  | 0  | 0  | 0 | 0  | 0  | 0 |
| Otu00297 | 7   | 1  | 3  | 3  | 0  | 0  | 0  | 0  | 0   | 0  | 0  | 0  | 0 | 0  | 0  | 0 |
| Otu00298 | 38  | 0  | 6  | 2  | 1  | 4  | 6  | 0  | 1   | 10 | 2  | 4  | 0 | 0  | 0  | 2 |
| Otu00299 | 37  | 37 | 0  | 0  | 0  | 0  | 0  | 0  | 0   | 0  | 0  | 0  | 0 | 0  | 0  | 0 |
| Otu00300 | 76  | 0  | 0  | 0  | 0  | 1  | 17 | 19 | 6   | 4  | 3  | 25 | 1 | 0  | 0  | 0 |
| Otu00301 | 105 | 0  | 0  | 0  | 0  | 27 | 71 | 1  | 3   | 1  | 2  | 0  | 0 | 0  | 0  | 0 |
| Otu00302 | 109 | 0  | 0  | 0  | 0  | 0  | 0  | 2  | 101 | 1  | 0  | 2  | 1 | 2  | 0  | 0 |
| Otu00303 | 71  | 0  | 0  | 0  | 9  | 13 | 9  | 8  | 13  | 9  | 5  | 4  | 1 | 0  | 0  | 0 |
| Otu00304 | 34  | 0  | 0  | 0  | 0  | 0  | 2  | 0  | 1   | 5  | 0  | 23 | 0 | 1  | 2  | 0 |

Supplementary 1  
 Taxonomy and Abundance of OTUs (see taxonomy of OTUs in Table S1A)  
 Normalized data, identification according to blast UNITEv7

|          |     |    |    |    |    |    |    |    |    |    |     |    |    |    |    |    |   |
|----------|-----|----|----|----|----|----|----|----|----|----|-----|----|----|----|----|----|---|
| Otu00305 | 36  | 0  | 0  | 0  | 0  | 35 | 1  | 0  | 0  | 0  | 0   | 0  | 0  | 0  | 0  | 0  | 0 |
| Otu00306 | 5   | 0  | 0  | 0  | 5  | 0  | 0  | 0  | 0  | 0  | 0   | 0  | 0  | 0  | 0  | 0  | 0 |
| Otu00307 | 41  | 0  | 0  | 0  | 0  | 4  | 1  | 1  | 0  | 0  | 0   | 0  | 0  | 16 | 19 | 0  | 0 |
| Otu00308 | 104 | 0  | 0  | 0  | 0  | 0  | 0  | 66 | 23 | 1  | 13  | 1  | 0  | 0  | 0  | 0  | 0 |
| Otu00309 | 68  | 0  | 0  | 0  | 0  | 2  | 18 | 7  | 4  | 4  | 15  | 18 | 0  | 0  | 0  | 0  | 0 |
| Otu00310 | 99  | 0  | 0  | 0  | 0  | 0  | 5  | 22 | 26 | 25 | 19  | 1  | 0  | 0  | 0  | 0  | 1 |
| Otu00311 | 33  | 0  | 0  | 15 | 18 | 0  | 0  | 0  | 0  | 0  | 0   | 0  | 0  | 0  | 0  | 0  | 0 |
| Otu00312 | 85  | 0  | 0  | 0  | 0  | 0  | 0  | 44 | 16 | 9  | 4   | 8  | 4  | 0  | 0  | 0  | 0 |
| Otu00313 | 26  | 0  | 1  | 25 | 0  | 0  | 0  | 0  | 0  | 0  | 0   | 0  | 0  | 0  | 0  | 0  | 0 |
| Otu00314 | 7   | 0  | 2  | 0  | 0  | 1  | 2  | 0  | 0  | 2  | 0   | 0  | 0  | 0  | 0  | 0  | 0 |
| Otu00315 | 47  | 0  | 0  | 42 | 5  | 0  | 0  | 0  | 0  | 0  | 0   | 0  | 0  | 0  | 0  | 0  | 0 |
| Otu00316 | 88  | 0  | 0  | 88 | 0  | 0  | 0  | 0  | 0  | 0  | 0   | 0  | 0  | 0  | 0  | 0  | 0 |
| Otu00317 | 44  | 3  | 1  | 0  | 0  | 14 | 6  | 3  | 3  | 8  | 1   | 4  | 0  | 1  | 0  | 0  | 0 |
| Otu00318 | 1   | 0  | 0  | 0  | 1  | 0  | 0  | 0  | 0  | 0  | 0   | 0  | 0  | 0  | 0  | 0  | 0 |
| Otu00319 | 103 | 0  | 0  | 0  | 0  | 0  | 0  | 0  | 1  | 0  | 102 | 0  | 0  | 0  | 0  | 0  | 0 |
| Otu00320 | 50  | 0  | 0  | 0  | 0  | 0  | 0  | 2  | 8  | 1  | 0   | 1  | 0  | 0  | 0  | 38 | 0 |
| Otu00321 | 44  | 0  | 39 | 3  | 1  | 0  | 0  | 0  | 0  | 1  | 0   | 0  | 0  | 0  | 0  | 0  | 0 |
| Otu00322 | 89  | 0  | 0  | 0  | 0  | 0  | 5  | 4  | 45 | 17 | 14  | 2  | 1  | 1  | 0  | 0  | 0 |
| Otu00323 | 69  | 0  | 0  | 0  | 0  | 24 | 13 | 0  | 21 | 4  | 1   | 4  | 0  | 2  | 0  | 0  | 0 |
| Otu00325 | 62  | 0  | 0  | 0  | 0  | 19 | 29 | 3  | 5  | 1  | 0   | 0  | 0  | 0  | 0  | 2  | 3 |
| Otu00326 | 0   | 0  | 0  | 0  | 0  | 0  | 0  | 0  | 0  | 0  | 0   | 0  | 0  | 0  | 0  | 0  | 0 |
| Otu00327 | 76  | 0  | 0  | 0  | 0  | 26 | 25 | 1  | 0  | 11 | 0   | 2  | 11 | 0  | 0  | 0  | 0 |
| Otu00328 | 76  | 0  | 0  | 0  | 0  | 2  | 5  | 4  | 24 | 12 | 10  | 1  | 11 | 2  | 5  | 0  | 0 |
| Otu00329 | 51  | 1  | 29 | 21 | 0  | 0  | 0  | 0  | 0  | 0  | 0   | 0  | 0  | 0  | 0  | 0  | 0 |
| Otu00330 | 21  | 4  | 4  | 12 | 1  | 0  | 0  | 0  | 0  | 0  | 0   | 0  | 0  | 0  | 0  | 0  | 0 |
| Otu00331 | 87  | 0  | 0  | 0  | 0  | 0  | 3  | 9  | 7  | 25 | 42  | 1  | 0  | 0  | 0  | 0  | 0 |
| Otu00332 | 27  | 0  | 0  | 0  | 11 | 0  | 0  | 8  | 5  | 3  | 0   | 0  | 0  | 0  | 0  | 0  | 0 |
| Otu00333 | 94  | 0  | 0  | 0  | 0  | 0  | 12 | 5  | 66 | 1  | 0   | 0  | 0  | 10 | 0  | 0  | 0 |
| Otu00334 | 67  | 0  | 0  | 0  | 0  | 1  | 16 | 5  | 5  | 10 | 10  | 3  | 0  | 7  | 8  | 2  | 0 |
| Otu00335 | 36  | 0  | 6  | 15 | 2  | 11 | 1  | 0  | 1  | 0  | 0   | 0  | 0  | 0  | 0  | 0  | 0 |
| Otu00336 | 56  | 0  | 54 | 0  | 1  | 1  | 0  | 0  | 0  | 0  | 0   | 0  | 0  | 0  | 0  | 0  | 0 |
| Otu00337 | 2   | 0  | 2  | 0  | 0  | 0  | 0  | 0  | 0  | 0  | 0   | 0  | 0  | 0  | 0  | 0  | 0 |
| Otu00338 | 73  | 0  | 0  | 0  | 0  | 0  | 8  | 21 | 34 | 5  | 4   | 1  | 0  | 0  | 0  | 0  | 0 |
| Otu00339 | 35  | 0  | 0  | 11 | 18 | 6  | 0  | 0  | 0  | 0  | 0   | 0  | 0  | 0  | 0  | 0  | 0 |
| Otu00340 | 49  | 0  | 0  | 0  | 0  | 0  | 0  | 1  | 27 | 1  | 0   | 19 | 0  | 0  | 0  | 0  | 1 |
| Otu00341 | 69  | 0  | 0  | 0  | 0  | 16 | 13 | 3  | 21 | 0  | 8   | 0  | 5  | 0  | 0  | 0  | 3 |
| Otu00342 | 69  | 0  | 0  | 0  | 0  | 3  | 18 | 0  | 0  | 30 | 2   | 0  | 12 | 0  | 4  | 0  | 0 |
| Otu00343 | 48  | 0  | 0  | 6  | 42 | 0  | 0  | 0  | 0  | 0  | 0   | 0  | 0  | 0  | 0  | 0  | 0 |
| Otu00344 | 79  | 0  | 0  | 79 | 0  | 0  | 0  | 0  | 0  | 0  | 0   | 0  | 0  | 0  | 0  | 0  | 0 |
| Otu00345 | 65  | 0  | 0  | 0  | 0  | 8  | 25 | 3  | 10 | 0  | 0   | 6  | 0  | 0  | 0  | 12 | 1 |
| Otu00346 | 13  | 0  | 2  | 1  | 10 | 0  | 0  | 0  | 0  | 0  | 0   | 0  | 0  | 0  | 0  | 0  | 0 |
| Otu00347 | 48  | 20 | 23 | 5  | 0  | 0  | 0  | 0  | 0  | 0  | 0   | 0  | 0  | 0  | 0  | 0  | 0 |
| Otu00348 | 69  | 0  | 0  | 0  | 0  | 3  | 7  | 6  | 19 | 12 | 14  | 6  | 1  | 0  | 0  | 0  | 1 |



Supplementary 1  
 Taxonomy and Abundance of OTUs (see taxonomy of OTUs in Table S1A)  
 Normalized data, identification according to blast UNITEv7

|          |    |    |    |    |    |    |    |    |    |    |    |    |    |   |    |   |
|----------|----|----|----|----|----|----|----|----|----|----|----|----|----|---|----|---|
| Otu00349 | 63 | 0  | 0  | 0  | 2  | 1  | 4  | 8  | 14 | 7  | 10 | 6  | 2  | 4 | 3  | 2 |
| Otu00350 | 85 | 0  | 0  | 0  | 0  | 0  | 0  | 0  | 77 | 0  | 6  | 1  | 0  | 0 | 1  | 0 |
| Otu00351 | 23 | 0  | 0  | 8  | 15 | 0  | 0  | 0  | 0  | 0  | 0  | 0  | 0  | 0 | 0  | 0 |
| Otu00352 | 88 | 0  | 0  | 0  | 0  | 3  | 85 | 0  | 0  | 0  | 0  | 0  | 0  | 0 | 0  | 0 |
| Otu00353 | 55 | 0  | 0  | 0  | 1  | 0  | 18 | 10 | 10 | 5  | 2  | 9  | 0  | 0 | 0  | 0 |
| Otu00354 | 83 | 0  | 0  | 0  | 0  | 0  | 0  | 1  | 76 | 0  | 1  | 0  | 2  | 3 | 0  | 0 |
| Otu00355 | 84 | 0  | 0  | 0  | 0  | 0  | 84 | 0  | 0  | 0  | 0  | 0  | 0  | 0 | 0  | 0 |
| Otu00356 | 68 | 0  | 0  | 0  | 0  | 0  | 3  | 0  | 2  | 13 | 11 | 39 | 0  | 0 | 0  | 0 |
| Otu00357 | 50 | 0  | 0  | 0  | 0  | 2  | 8  | 1  | 10 | 13 | 8  | 3  | 2  | 3 | 0  | 0 |
| Otu00358 | 50 | 0  | 0  | 0  | 1  | 8  | 7  | 4  | 11 | 3  | 12 | 4  | 0  | 0 | 0  | 0 |
| Otu00359 | 25 | 0  | 11 | 2  | 8  | 2  | 0  | 0  | 2  | 0  | 0  | 0  | 0  | 0 | 0  | 0 |
| Otu00360 | 22 | 0  | 14 | 3  | 5  | 0  | 0  | 0  | 0  | 0  | 0  | 0  | 0  | 0 | 0  | 0 |
| Otu00361 | 19 | 3  | 3  | 11 | 2  | 0  | 0  | 0  | 0  | 0  | 0  | 0  | 0  | 0 | 0  | 0 |
| Otu00362 | 41 | 0  | 0  | 0  | 0  | 0  | 0  | 0  | 0  | 0  | 0  | 3  | 0  | 0 | 38 | 0 |
| Otu00363 | 63 | 0  | 0  | 0  | 0  | 4  | 3  | 4  | 19 | 14 | 8  | 4  | 4  | 1 | 0  | 2 |
| Otu00364 | 65 | 0  | 0  | 0  | 0  | 0  | 3  | 18 | 9  | 17 | 14 | 3  | 1  | 0 | 0  | 0 |
| Otu00365 | 22 | 0  | 0  | 0  | 0  | 0  | 4  | 4  | 1  | 3  | 4  | 5  | 1  | 0 | 0  | 0 |
| Otu00366 | 51 | 0  | 1  | 0  | 0  | 6  | 4  | 2  | 8  | 18 | 7  | 4  | 1  | 0 | 0  | 0 |
| Otu00367 | 51 | 0  | 1  | 8  | 4  | 16 | 1  | 4  | 7  | 7  | 1  | 1  | 0  | 0 | 1  | 0 |
| Otu00368 | 4  | 0  | 0  | 0  | 4  | 0  | 0  | 0  | 0  | 0  | 0  | 0  | 0  | 0 | 0  | 0 |
| Otu00369 | 12 | 0  | 0  | 0  | 0  | 12 | 0  | 0  | 0  | 0  | 0  | 0  | 0  | 0 | 0  | 0 |
| Otu00370 | 29 | 0  | 0  | 1  | 25 | 3  | 0  | 0  | 0  | 0  | 0  | 0  | 0  | 0 | 0  | 0 |
| Otu00371 | 54 | 0  | 0  | 0  | 0  | 0  | 17 | 0  | 5  | 14 | 1  | 0  | 0  | 0 | 17 | 0 |
| Otu00372 | 22 | 0  | 17 | 0  | 5  | 0  | 0  | 0  | 0  | 0  | 0  | 0  | 0  | 0 | 0  | 0 |
| Otu00373 | 6  | 0  | 1  | 0  | 0  | 3  | 1  | 0  | 0  | 1  | 0  | 0  | 0  | 0 | 0  | 0 |
| Otu00374 | 57 | 0  | 0  | 0  | 1  | 0  | 13 | 0  | 2  | 3  | 0  | 16 | 21 | 0 | 0  | 1 |
| Otu00375 | 15 | 0  | 0  | 1  | 9  | 5  | 0  | 0  | 0  | 0  | 0  | 0  | 0  | 0 | 0  | 0 |
| Otu00376 | 50 | 0  | 0  | 0  | 0  | 2  | 26 | 2  | 4  | 7  | 0  | 6  | 0  | 1 | 2  | 0 |
| Otu00377 | 12 | 0  | 0  | 0  | 0  | 0  | 0  | 11 | 0  | 1  | 0  | 0  | 0  | 0 | 0  | 0 |
| Otu00378 | 72 | 0  | 0  | 0  | 0  | 0  | 0  | 8  | 53 | 0  | 5  | 6  | 0  | 0 | 0  | 0 |
| Otu00379 | 40 | 0  | 0  | 0  | 0  | 11 | 8  | 1  | 7  | 0  | 11 | 2  | 0  | 0 | 0  | 0 |
| Otu00380 | 73 | 0  | 0  | 0  | 0  | 0  | 5  | 0  | 8  | 39 | 17 | 3  | 0  | 1 | 0  | 0 |
| Otu00381 | 18 | 0  | 2  | 16 | 0  | 0  | 0  | 0  | 0  | 0  | 0  | 0  | 0  | 0 | 0  | 0 |
| Otu00382 | 71 | 0  | 0  | 0  | 0  | 0  | 5  | 21 | 8  | 14 | 13 | 7  | 3  | 0 | 0  | 0 |
| Otu00383 | 67 | 0  | 0  | 0  | 0  | 3  | 12 | 2  | 37 | 6  | 0  | 4  | 0  | 2 | 1  | 0 |
| Otu00384 | 5  | 0  | 0  | 0  | 0  | 0  | 4  | 1  | 0  | 0  | 0  | 0  | 0  | 0 | 0  | 0 |
| Otu00385 | 44 | 0  | 0  | 0  | 0  | 2  | 14 | 1  | 4  | 9  | 9  | 2  | 2  | 1 | 0  | 0 |
| Otu00386 | 52 | 0  | 0  | 0  | 0  | 0  | 7  | 21 | 5  | 9  | 4  | 5  | 0  | 0 | 1  | 0 |
| Otu00387 | 24 | 2  | 4  | 15 | 3  | 0  | 0  | 0  | 0  | 0  | 0  | 0  | 0  | 0 | 0  | 0 |
| Otu00388 | 21 | 21 | 0  | 0  | 0  | 0  | 0  | 0  | 0  | 0  | 0  | 0  | 0  | 0 | 0  | 0 |
| Otu00389 | 35 | 0  | 0  | 0  | 0  | 0  | 13 | 4  | 0  | 4  | 3  | 6  | 0  | 2 | 3  | 0 |
| Otu00390 | 64 | 0  | 0  | 0  | 0  | 0  | 0  | 61 | 0  | 0  | 0  | 3  | 0  | 0 | 0  | 0 |
| Otu00391 | 40 | 0  | 0  | 38 | 0  | 0  | 1  | 0  | 1  | 0  | 0  | 0  | 0  | 0 | 0  | 0 |

Supplementary 1  
 Taxonomy and Abundance of OTUs (see taxonomy of OTUs in Table S1A)  
 Normalized data, identification according to blast UNITEv7

|          |    |   |    |    |    |    |    |    |    |    |    |    |    |   |   |   |
|----------|----|---|----|----|----|----|----|----|----|----|----|----|----|---|---|---|
| Otu00392 | 51 | 0 | 0  | 0  | 0  | 0  | 8  | 10 | 10 | 9  | 13 | 1  | 0  | 0 | 0 | 0 |
| Otu00393 | 29 | 0 | 0  | 0  | 1  | 3  | 12 | 0  | 2  | 2  | 4  | 5  | 0  | 0 | 0 | 0 |
| Otu00394 | 25 | 0 | 0  | 8  | 14 | 1  | 0  | 0  | 1  | 0  | 1  | 0  | 0  | 0 | 0 | 0 |
| Otu00395 | 58 | 0 | 0  | 0  | 0  | 0  | 10 | 1  | 13 | 8  | 7  | 11 | 4  | 1 | 0 | 3 |
| Otu00396 | 50 | 0 | 0  | 0  | 0  | 14 | 8  | 1  | 12 | 0  | 0  | 13 | 0  | 2 | 0 | 0 |
| Otu00397 | 18 | 2 | 15 | 0  | 0  | 0  | 0  | 0  | 0  | 1  | 0  | 0  | 0  | 0 | 0 | 0 |
| Otu00398 | 48 | 0 | 0  | 0  | 0  | 5  | 17 | 0  | 7  | 0  | 0  | 19 | 0  | 0 | 0 | 0 |
| Otu00399 | 41 | 0 | 0  | 0  | 3  | 26 | 2  | 0  | 1  | 3  | 1  | 5  | 0  | 0 | 0 | 0 |
| Otu00400 | 31 | 0 | 0  | 1  | 0  | 0  | 6  | 9  | 3  | 5  | 6  | 1  | 0  | 0 | 0 | 0 |
| Otu00401 | 48 | 0 | 0  | 0  | 0  | 8  | 0  | 2  | 4  | 25 | 6  | 0  | 3  | 0 | 0 | 0 |
| Otu00402 | 18 | 0 | 0  | 8  | 1  | 3  | 3  | 0  | 3  | 0  | 0  | 0  | 0  | 0 | 0 | 0 |
| Otu00403 | 21 | 0 | 11 | 5  | 5  | 0  | 0  | 0  | 0  | 0  | 0  | 0  | 0  | 0 | 0 | 0 |
| Otu00404 | 21 | 0 | 0  | 0  | 0  | 19 | 0  | 0  | 1  | 0  | 0  | 0  | 0  | 1 | 0 | 0 |
| Otu00405 | 16 | 0 | 0  | 0  | 0  | 1  | 4  | 3  | 0  | 7  | 0  | 1  | 0  | 0 | 0 | 0 |
| Otu00406 | 29 | 0 | 0  | 0  | 0  | 28 | 0  | 0  | 0  | 0  | 1  | 0  | 0  | 0 | 0 | 0 |
| Otu00407 | 49 | 0 | 0  | 0  | 0  | 0  | 3  | 15 | 9  | 0  | 9  | 3  | 0  | 7 | 1 | 2 |
| Otu00408 | 30 | 0 | 0  | 16 | 6  | 7  | 1  | 0  | 0  | 0  | 0  | 0  | 0  | 0 | 0 | 0 |
| Otu00409 | 27 | 0 | 0  | 10 | 16 | 0  | 0  | 0  | 0  | 0  | 1  | 0  | 0  | 0 | 0 | 0 |
| Otu00410 | 23 | 0 | 0  | 0  | 0  | 1  | 1  | 2  | 3  | 10 | 3  | 3  | 0  | 0 | 0 | 0 |
| Otu00411 | 41 | 0 | 0  | 0  | 0  | 0  | 0  | 5  | 7  | 18 | 5  | 0  | 6  | 0 | 0 | 0 |
| Otu00412 | 29 | 0 | 0  | 0  | 0  | 1  | 3  | 0  | 3  | 0  | 0  | 5  | 8  | 0 | 9 | 0 |
| Otu00413 | 46 | 0 | 0  | 0  | 0  | 0  | 2  | 11 | 14 | 3  | 13 | 3  | 0  | 0 | 0 | 0 |
| Otu00414 | 64 | 0 | 0  | 0  | 0  | 0  | 0  | 3  | 0  | 61 | 0  | 0  | 0  | 0 | 0 | 0 |
| Otu00415 | 45 | 0 | 44 | 1  | 0  | 0  | 0  | 0  | 0  | 0  | 0  | 0  | 0  | 0 | 0 | 0 |
| Otu00416 | 30 | 0 | 0  | 0  | 14 | 15 | 0  | 0  | 1  | 0  | 0  | 0  | 0  | 0 | 0 | 0 |
| Otu00417 | 24 | 0 | 0  | 0  | 15 | 9  | 0  | 0  | 0  | 0  | 0  | 0  | 0  | 0 | 0 | 0 |
| Otu00418 | 21 | 0 | 7  | 5  | 8  | 1  | 0  | 0  | 0  | 0  | 0  | 0  | 0  | 0 | 0 | 0 |
| Otu00419 | 40 | 0 | 0  | 0  | 0  | 0  | 0  | 4  | 28 | 0  | 0  | 0  | 0  | 0 | 8 | 0 |
| Otu00420 | 35 | 0 | 0  | 0  | 0  | 18 | 2  | 2  | 1  | 3  | 6  | 2  | 0  | 0 | 1 | 0 |
| Otu00421 | 50 | 0 | 0  | 0  | 0  | 4  | 3  | 5  | 14 | 7  | 11 | 4  | 2  | 0 | 0 | 0 |
| Otu00422 | 40 | 0 | 0  | 0  | 0  | 5  | 21 | 3  | 5  | 0  | 1  | 4  | 1  | 0 | 0 | 0 |
| Otu00423 | 18 | 7 | 4  | 5  | 2  | 0  | 0  | 0  | 0  | 0  | 0  | 0  | 0  | 0 | 0 | 0 |
| Otu00424 | 31 | 0 | 0  | 29 | 2  | 0  | 0  | 0  | 0  | 0  | 0  | 0  | 0  | 0 | 0 | 0 |
| Otu00425 | 49 | 0 | 0  | 0  | 0  | 6  | 0  | 5  | 0  | 25 | 0  | 7  | 3  | 0 | 0 | 3 |
| Otu00426 | 53 | 0 | 0  | 0  | 0  | 0  | 0  | 0  | 34 | 1  | 13 | 5  | 0  | 0 | 0 | 0 |
| Otu00427 | 53 | 0 | 0  | 0  | 0  | 1  | 9  | 6  | 25 | 4  | 0  | 1  | 0  | 6 | 0 | 1 |
| Otu00428 | 15 | 0 | 0  | 0  | 0  | 1  | 3  | 4  | 1  | 1  | 1  | 2  | 2  | 0 | 0 | 0 |
| Otu00429 | 9  | 0 | 0  | 2  | 7  | 0  | 0  | 0  | 0  | 0  | 0  | 0  | 0  | 0 | 0 | 0 |
| Otu00430 | 15 | 5 | 2  | 6  | 2  | 0  | 0  | 0  | 0  | 0  | 0  | 0  | 0  | 0 | 0 | 0 |
| Otu00431 | 31 | 0 | 0  | 0  | 0  | 0  | 0  | 2  | 1  | 8  | 2  | 5  | 13 | 0 | 0 | 0 |
| Otu00432 | 10 | 7 | 1  | 2  | 0  | 0  | 0  | 0  | 0  | 0  | 0  | 0  | 0  | 0 | 0 | 0 |
| Otu00433 | 39 | 0 | 1  | 12 | 3  | 12 | 0  | 5  | 5  | 1  | 0  | 0  | 0  | 0 | 0 | 0 |
| Otu00434 | 6  | 0 | 0  | 0  | 0  | 1  | 2  | 1  | 1  | 0  | 1  | 0  | 0  | 0 | 0 | 0 |

Supplementary 1  
 Taxonomy and Abundance of OTUs (see taxonomy of OTUs in Table S1A)  
 Normalized data, identification according to blast UNITEv7

|          |    |    |    |    |    |    |    |    |    |    |    |   |   |   |    |   |
|----------|----|----|----|----|----|----|----|----|----|----|----|---|---|---|----|---|
| Otu00435 | 1  | 0  | 0  | 0  | 0  | 0  | 0  | 1  | 0  | 0  | 0  | 0 | 0 | 0 | 0  | 0 |
| Otu00436 | 31 | 9  | 4  | 0  | 0  | 0  | 1  | 0  | 9  | 3  | 3  | 2 | 0 | 0 | 0  | 0 |
| Otu00437 | 41 | 0  | 0  | 0  | 2  | 3  | 3  | 8  | 5  | 9  | 11 | 0 | 0 | 0 | 0  | 0 |
| Otu00438 | 22 | 0  | 0  | 0  | 0  | 2  | 12 | 1  | 0  | 2  | 1  | 3 | 0 | 1 | 0  | 0 |
| Otu00439 | 44 | 0  | 44 | 0  | 0  | 0  | 0  | 0  | 0  | 0  | 0  | 0 | 0 | 0 | 0  | 0 |
| Otu00440 | 38 | 0  | 0  | 0  | 0  | 2  | 0  | 0  | 4  | 2  | 6  | 1 | 3 | 0 | 20 | 0 |
| Otu00441 | 1  | 0  | 0  | 0  | 1  | 0  | 0  | 0  | 0  | 0  | 0  | 0 | 0 | 0 | 0  | 0 |
| Otu00442 | 49 | 0  | 0  | 0  | 0  | 0  | 0  | 23 | 0  | 20 | 0  | 3 | 3 | 0 | 0  | 0 |
| Otu00443 | 30 | 0  | 0  | 30 | 0  | 0  | 0  | 0  | 0  | 0  | 0  | 0 | 0 | 0 | 0  | 0 |
| Otu00444 | 12 | 0  | 0  | 0  | 6  | 4  | 0  | 1  | 0  | 0  | 1  | 0 | 0 | 0 | 0  | 0 |
| Otu00445 | 14 | 3  | 6  | 2  | 3  | 0  | 0  | 0  | 0  | 0  | 0  | 0 | 0 | 0 | 0  | 0 |
| Otu00446 | 20 | 1  | 0  | 2  | 4  | 0  | 0  | 2  | 2  | 3  | 4  | 2 | 0 | 0 | 0  | 0 |
| Otu00447 | 44 | 0  | 0  | 0  | 0  | 10 | 15 | 1  | 1  | 6  | 2  | 8 | 1 | 0 | 0  | 0 |
| Otu00448 | 52 | 0  | 0  | 0  | 0  | 0  | 0  | 0  | 0  | 51 | 0  | 0 | 0 | 0 | 1  | 0 |
| Otu00449 | 20 | 18 | 2  | 0  | 0  | 0  | 0  | 0  | 0  | 0  | 0  | 0 | 0 | 0 | 0  | 0 |
| Otu00450 | 31 | 0  | 0  | 0  | 0  | 2  | 1  | 0  | 10 | 1  | 10 | 7 | 0 | 0 | 0  | 0 |
| Otu00451 | 12 | 0  | 0  | 0  | 12 | 0  | 0  | 0  | 0  | 0  | 0  | 0 | 0 | 0 | 0  | 0 |
| Otu00452 | 10 | 0  | 0  | 0  | 10 | 0  | 0  | 0  | 0  | 0  | 0  | 0 | 0 | 0 | 0  | 0 |
| Otu00453 | 13 | 0  | 0  | 0  | 5  | 5  | 0  | 3  | 0  | 0  | 0  | 0 | 0 | 0 | 0  | 0 |
| Otu00454 | 22 | 0  | 0  | 18 | 4  | 0  | 0  | 0  | 0  | 0  | 0  | 0 | 0 | 0 | 0  | 0 |
| Otu00455 | 30 | 0  | 0  | 29 | 0  | 0  | 0  | 0  | 0  | 0  | 1  | 0 | 0 | 0 | 0  | 0 |
| Otu00456 | 19 | 13 | 5  | 0  | 0  | 0  | 0  | 0  | 0  | 0  | 1  | 0 | 0 | 0 | 0  | 0 |
| Otu00457 | 30 | 0  | 0  | 0  | 1  | 3  | 3  | 8  | 6  | 5  | 4  | 0 | 0 | 0 | 0  | 0 |
| Otu00458 | 35 | 0  | 0  | 7  | 1  | 2  | 2  | 1  | 7  | 9  | 2  | 4 | 0 | 0 | 0  | 0 |
| Otu00459 | 14 | 0  | 0  | 0  | 10 | 2  | 0  | 1  | 0  | 1  | 0  | 0 | 0 | 0 | 0  | 0 |
| Otu00460 | 18 | 17 | 1  | 0  | 0  | 0  | 0  | 0  | 0  | 0  | 0  | 0 | 0 | 0 | 0  | 0 |
| Otu00461 | 47 | 0  | 0  | 0  | 0  | 1  | 1  | 4  | 39 | 1  | 0  | 0 | 0 | 0 | 0  | 1 |
| Otu00462 | 8  | 0  | 7  | 1  | 0  | 0  | 0  | 0  | 0  | 0  | 0  | 0 | 0 | 0 | 0  | 0 |
| Otu00463 | 14 | 0  | 0  | 0  | 0  | 0  | 0  | 0  | 14 | 0  | 0  | 0 | 0 | 0 | 0  | 0 |
| Otu00464 | 2  | 0  | 0  | 1  | 1  | 0  | 0  | 0  | 0  | 0  | 0  | 0 | 0 | 0 | 0  | 0 |
| Otu00465 | 33 | 0  | 0  | 0  | 0  | 3  | 20 | 0  | 3  | 0  | 2  | 4 | 0 | 0 | 0  | 1 |
| Otu00466 | 27 | 0  | 0  | 0  | 0  | 0  | 3  | 0  | 2  | 0  | 0  | 0 | 8 | 0 | 14 | 0 |
| Otu00467 | 9  | 0  | 0  | 6  | 3  | 0  | 0  | 0  | 0  | 0  | 0  | 0 | 0 | 0 | 0  | 0 |
| Otu00468 | 35 | 0  | 0  | 0  | 0  | 0  | 5  | 2  | 8  | 13 | 3  | 3 | 0 | 0 | 0  | 1 |
| Otu00469 | 36 | 0  | 0  | 0  | 0  | 0  | 0  | 5  | 26 | 5  | 0  | 0 | 0 | 0 | 0  | 0 |
| Otu00470 | 38 | 0  | 12 | 0  | 0  | 0  | 1  | 0  | 4  | 6  | 15 | 0 | 0 | 0 | 0  | 0 |
| Otu00471 | 13 | 11 | 1  | 0  | 0  | 1  | 0  | 0  | 0  | 0  | 0  | 0 | 0 | 0 | 0  | 0 |
| Otu00472 | 29 | 0  | 0  | 0  | 0  | 18 | 2  | 0  | 0  | 0  | 0  | 0 | 0 | 9 | 0  | 0 |
| Otu00473 | 30 | 0  | 0  | 0  | 0  | 1  | 2  | 4  | 6  | 4  | 2  | 9 | 1 | 0 | 0  | 1 |
| Otu00474 | 20 | 0  | 0  | 0  | 2  | 4  | 1  | 1  | 7  | 1  | 4  | 0 | 0 | 0 | 0  | 0 |
| Otu00475 | 32 | 0  | 0  | 0  | 0  | 0  | 1  | 1  | 13 | 9  | 2  | 2 | 2 | 0 | 2  | 0 |
| Otu00476 | 29 | 0  | 0  | 0  | 0  | 0  | 3  | 5  | 8  | 1  | 1  | 1 | 6 | 0 | 0  | 4 |
| Otu00477 | 21 | 0  | 0  | 0  | 0  | 0  | 2  | 2  | 1  | 0  | 14 | 0 | 1 | 0 | 0  | 1 |

Supplementary 1  
 Taxonomy and Abundance of OTUs (see taxonomy of OTUs in Table S1A)  
 Normalized data, identification according to blast UNITEv7

|          |    |    |   |    |    |    |    |    |    |    |    |   |   |    |    |   |
|----------|----|----|---|----|----|----|----|----|----|----|----|---|---|----|----|---|
| Otu00478 | 32 | 0  | 0 | 0  | 0  | 3  | 5  | 2  | 12 | 1  | 1  | 3 | 2 | 0  | 3  | 0 |
| Otu00479 | 11 | 0  | 0 | 0  | 8  | 0  | 0  | 3  | 0  | 0  | 0  | 0 | 0 | 0  | 0  | 0 |
| Otu00480 | 42 | 0  | 0 | 0  | 0  | 9  | 33 | 0  | 0  | 0  | 0  | 0 | 0 | 0  | 0  | 0 |
| Otu00481 | 17 | 0  | 0 | 0  | 0  | 0  | 8  | 2  | 1  | 4  | 1  | 0 | 0 | 0  | 0  | 1 |
| Otu00482 | 38 | 0  | 0 | 0  | 0  | 13 | 2  | 6  | 1  | 10 | 4  | 2 | 0 | 0  | 0  | 0 |
| Otu00483 | 18 | 0  | 0 | 0  | 0  | 0  | 0  | 0  | 2  | 0  | 0  | 0 | 0 | 16 | 0  | 0 |
| Otu00484 | 29 | 0  | 0 | 0  | 0  | 5  | 0  | 5  | 5  | 4  | 8  | 1 | 1 | 0  | 0  | 0 |
| Otu00485 | 32 | 0  | 0 | 0  | 0  | 4  | 2  | 1  | 18 | 0  | 2  | 4 | 1 | 0  | 0  | 0 |
| Otu00486 | 23 | 0  | 0 | 0  | 0  | 1  | 10 | 5  | 5  | 1  | 0  | 0 | 1 | 0  | 0  | 0 |
| Otu00487 | 25 | 0  | 0 | 0  | 0  | 0  | 5  | 1  | 8  | 4  | 4  | 3 | 0 | 0  | 0  | 0 |
| Otu00488 | 10 | 6  | 0 | 4  | 0  | 0  | 0  | 0  | 0  | 0  | 0  | 0 | 0 | 0  | 0  | 0 |
| Otu00489 | 41 | 0  | 0 | 0  | 0  | 0  | 0  | 0  | 6  | 32 | 1  | 1 | 1 | 0  | 0  | 0 |
| Otu00490 | 13 | 0  | 0 | 8  | 5  | 0  | 0  | 0  | 0  | 0  | 0  | 0 | 0 | 0  | 0  | 0 |
| Otu00492 | 34 | 34 | 0 | 0  | 0  | 0  | 0  | 0  | 0  | 0  | 0  | 0 | 0 | 0  | 0  | 0 |
| Otu00493 | 14 | 0  | 0 | 0  | 0  | 1  | 3  | 2  | 0  | 2  | 0  | 3 | 2 | 0  | 0  | 1 |
| Otu00494 | 13 | 2  | 2 | 7  | 2  | 0  | 0  | 0  | 0  | 0  | 0  | 0 | 0 | 0  | 0  | 0 |
| Otu00495 | 22 | 14 | 5 | 0  | 1  | 1  | 0  | 0  | 0  | 0  | 1  | 0 | 0 | 0  | 0  | 0 |
| Otu00496 | 21 | 0  | 0 | 0  | 0  | 2  | 15 | 4  | 0  | 0  | 0  | 0 | 0 | 0  | 0  | 0 |
| Otu00497 | 10 | 0  | 4 | 0  | 0  | 0  | 1  | 1  | 3  | 0  | 1  | 0 | 0 | 0  | 0  | 0 |
| Otu00498 | 30 | 0  | 0 | 0  | 1  | 0  | 3  | 5  | 8  | 11 | 0  | 1 | 0 | 0  | 1  | 0 |
| Otu00499 | 30 | 0  | 0 | 0  | 0  | 0  | 6  | 3  | 8  | 10 | 3  | 0 | 0 | 0  | 0  | 0 |
| Otu00500 | 15 | 0  | 0 | 2  | 4  | 8  | 0  | 0  | 1  | 0  | 0  | 0 | 0 | 0  | 0  | 0 |
| Otu00501 | 17 | 0  | 0 | 16 | 0  | 1  | 0  | 0  | 0  | 0  | 0  | 0 | 0 | 0  | 0  | 0 |
| Otu00502 | 16 | 0  | 0 | 0  | 0  | 0  | 0  | 0  | 0  | 0  | 0  | 0 | 0 | 0  | 16 | 0 |
| Otu00503 | 31 | 0  | 0 | 0  | 0  | 0  | 0  | 0  | 22 | 7  | 0  | 0 | 2 | 0  | 0  | 0 |
| Otu00504 | 25 | 0  | 0 | 0  | 24 | 1  | 0  | 0  | 0  | 0  | 0  | 0 | 0 | 0  | 0  | 0 |
| Otu00505 | 38 | 0  | 0 | 0  | 0  | 0  | 5  | 10 | 6  | 12 | 4  | 1 | 0 | 0  | 0  | 0 |
| Otu00506 | 36 | 0  | 0 | 0  | 0  | 5  | 4  | 0  | 20 | 5  | 2  | 0 | 0 | 0  | 0  | 0 |
| Otu00507 | 15 | 0  | 0 | 0  | 0  | 0  | 0  | 0  | 0  | 0  | 0  | 0 | 0 | 1  | 14 | 0 |
| Otu00508 | 28 | 0  | 0 | 27 | 1  | 0  | 0  | 0  | 0  | 0  | 0  | 0 | 0 | 0  | 0  | 0 |
| Otu00509 | 29 | 0  | 0 | 0  | 0  | 0  | 1  | 9  | 7  | 3  | 0  | 9 | 0 | 0  | 0  | 0 |
| Otu00510 | 1  | 1  | 0 | 0  | 0  | 0  | 0  | 0  | 0  | 0  | 0  | 0 | 0 | 0  | 0  | 0 |
| Otu00511 | 9  | 0  | 0 | 9  | 0  | 0  | 0  | 0  | 0  | 0  | 0  | 0 | 0 | 0  | 0  | 0 |
| Otu00512 | 17 | 0  | 0 | 0  | 0  | 2  | 1  | 1  | 5  | 3  | 3  | 1 | 0 | 0  | 1  | 0 |
| Otu00513 | 21 | 0  | 0 | 1  | 0  | 1  | 3  | 0  | 6  | 6  | 0  | 3 | 0 | 0  | 0  | 1 |
| Otu00514 | 35 | 0  | 0 | 0  | 0  | 5  | 4  | 15 | 5  | 4  | 2  | 0 | 0 | 0  | 0  | 0 |
| Otu00515 | 30 | 0  | 0 | 0  | 0  | 0  | 0  | 5  | 6  | 11 | 1  | 7 | 0 | 0  | 0  | 0 |
| Otu00516 | 34 | 0  | 0 | 0  | 0  | 1  | 2  | 9  | 8  | 6  | 5  | 3 | 0 | 0  | 0  | 0 |
| Otu00517 | 21 | 0  | 0 | 0  | 0  | 0  | 0  | 5  | 1  | 4  | 4  | 7 | 0 | 0  | 0  | 0 |
| Otu00518 | 27 | 0  | 0 | 0  | 0  | 1  | 0  | 2  | 1  | 0  | 15 | 3 | 0 | 5  | 0  | 0 |
| Otu00519 | 17 | 0  | 0 | 11 | 4  | 1  | 1  | 0  | 0  | 0  | 0  | 0 | 0 | 0  | 0  | 0 |
| Otu00520 | 18 | 0  | 0 | 1  | 17 | 0  | 0  | 0  | 0  | 0  | 0  | 0 | 0 | 0  | 0  | 0 |
| Otu00521 | 23 | 0  | 0 | 0  | 0  | 5  | 4  | 1  | 6  | 1  | 3  | 1 | 2 | 0  | 0  | 0 |

Supplementary 1  
 Taxonomy and Abundance of OTUs (see taxonomy of OTUs in Table S1A)  
 Normalized data, identification according to blast UNITEv7

|          |    |    |   |    |    |    |    |   |    |    |    |   |   |   |   |   |
|----------|----|----|---|----|----|----|----|---|----|----|----|---|---|---|---|---|
| Otu00522 | 21 | 0  | 0 | 0  | 0  | 14 | 5  | 1 | 0  | 0  | 0  | 1 | 0 | 0 | 0 | 0 |
| Otu00523 | 14 | 0  | 0 | 0  | 1  | 5  | 4  | 1 | 0  | 0  | 0  | 3 | 0 | 0 | 0 | 0 |
| Otu00524 | 34 | 0  | 0 | 0  | 0  | 1  | 0  | 6 | 4  | 18 | 4  | 1 | 0 | 0 | 0 | 0 |
| Otu00525 | 34 | 0  | 0 | 0  | 0  | 0  | 5  | 1 | 3  | 0  | 20 | 4 | 0 | 0 | 1 | 0 |
| Otu00526 | 26 | 26 | 0 | 0  | 0  | 0  | 0  | 0 | 0  | 0  | 0  | 0 | 0 | 0 | 0 | 0 |
| Otu00527 | 8  | 0  | 0 | 0  | 8  | 0  | 0  | 0 | 0  | 0  | 0  | 0 | 0 | 0 | 0 | 0 |
| Otu00528 | 6  | 0  | 0 | 0  | 4  | 2  | 0  | 0 | 0  | 0  | 0  | 0 | 0 | 0 | 0 | 0 |
| Otu00529 | 23 | 0  | 0 | 4  | 2  | 5  | 5  | 2 | 5  | 0  | 0  | 0 | 0 | 0 | 0 | 0 |
| Otu00530 | 14 | 0  | 0 | 4  | 2  | 6  | 0  | 0 | 1  | 1  | 0  | 0 | 0 | 0 | 0 | 0 |
| Otu00531 | 30 | 0  | 0 | 0  | 1  | 0  | 2  | 5 | 9  | 4  | 8  | 1 | 0 | 0 | 0 | 0 |
| Otu00532 | 30 | 0  | 0 | 0  | 2  | 7  | 2  | 1 | 7  | 2  | 7  | 1 | 1 | 0 | 0 | 0 |
| Otu00533 | 29 | 0  | 2 | 0  | 0  | 12 | 2  | 2 | 4  | 4  | 3  | 0 | 0 | 0 | 0 | 0 |
| Otu00534 | 15 | 0  | 0 | 0  | 0  | 8  | 3  | 1 | 0  | 2  | 1  | 0 | 0 | 0 | 0 | 0 |
| Otu00535 | 24 | 0  | 0 | 0  | 0  | 11 | 6  | 1 | 2  | 0  | 0  | 2 | 0 | 0 | 0 | 2 |
| Otu00536 | 25 | 0  | 0 | 0  | 0  | 10 | 7  | 0 | 1  | 0  | 0  | 5 | 2 | 0 | 0 | 0 |
| Otu00537 | 6  | 0  | 6 | 0  | 0  | 0  | 0  | 0 | 0  | 0  | 0  | 0 | 0 | 0 | 0 | 0 |
| Otu00538 | 22 | 0  | 0 | 22 | 0  | 0  | 0  | 0 | 0  | 0  | 0  | 0 | 0 | 0 | 0 | 0 |
| Otu00539 | 27 | 0  | 0 | 0  | 0  | 1  | 3  | 8 | 1  | 8  | 3  | 3 | 0 | 0 | 0 | 0 |
| Otu00540 | 14 | 0  | 0 | 0  | 0  | 0  | 0  | 1 | 3  | 0  | 0  | 0 | 0 | 5 | 5 | 0 |
| Otu00541 | 0  | 0  | 0 | 0  | 0  | 0  | 0  | 0 | 0  | 0  | 0  | 0 | 0 | 0 | 0 | 0 |
| Otu00542 | 20 | 0  | 0 | 1  | 1  | 0  | 0  | 1 | 3  | 7  | 6  | 1 | 0 | 0 | 0 | 0 |
| Otu00543 | 9  | 0  | 1 | 8  | 0  | 0  | 0  | 0 | 0  | 0  | 0  | 0 | 0 | 0 | 0 | 0 |
| Otu00544 | 15 | 0  | 0 | 0  | 0  | 1  | 3  | 0 | 2  | 6  | 2  | 1 | 0 | 0 | 0 | 0 |
| Otu00545 | 21 | 0  | 0 | 0  | 0  | 3  | 4  | 0 | 0  | 6  | 1  | 6 | 0 | 1 | 0 | 0 |
| Otu00546 | 15 | 0  | 0 | 0  | 0  | 0  | 0  | 0 | 11 | 0  | 0  | 4 | 0 | 0 | 0 | 0 |
| Otu00547 | 30 | 0  | 0 | 0  | 0  | 2  | 0  | 3 | 17 | 4  | 3  | 0 | 1 | 0 | 0 | 0 |
| Otu00548 | 28 | 0  | 0 | 0  | 0  | 1  | 6  | 1 | 4  | 4  | 8  | 3 | 0 | 1 | 0 | 0 |
| Otu00550 | 20 | 0  | 0 | 20 | 0  | 0  | 0  | 0 | 0  | 0  | 0  | 0 | 0 | 0 | 0 | 0 |
| Otu00551 | 25 | 0  | 0 | 0  | 25 | 0  | 0  | 0 | 0  | 0  | 0  | 0 | 0 | 0 | 0 | 0 |
| Otu00552 | 8  | 0  | 0 | 8  | 0  | 0  | 0  | 0 | 0  | 0  | 0  | 0 | 0 | 0 | 0 | 0 |
| Otu00553 | 23 | 0  | 0 | 0  | 3  | 0  | 1  | 4 | 1  | 8  | 4  | 1 | 1 | 0 | 0 | 0 |
| Otu00554 | 29 | 0  | 0 | 0  | 0  | 9  | 1  | 5 | 8  | 0  | 0  | 6 | 0 | 0 | 0 | 0 |
| Otu00555 | 8  | 0  | 1 | 4  | 0  | 2  | 0  | 0 | 1  | 0  | 0  | 0 | 0 | 0 | 0 | 0 |
| Otu00556 | 30 | 0  | 0 | 0  | 0  | 0  | 0  | 3 | 10 | 7  | 7  | 2 | 0 | 1 | 0 | 0 |
| Otu00557 | 32 | 0  | 0 | 0  | 0  | 3  | 11 | 1 | 6  | 9  | 2  | 0 | 0 | 0 | 0 | 0 |
| Otu00558 | 14 | 0  | 0 | 14 | 0  | 0  | 0  | 0 | 0  | 0  | 0  | 0 | 0 | 0 | 0 | 0 |
| Otu00559 | 13 | 0  | 0 | 13 | 0  | 0  | 0  | 0 | 0  | 0  | 0  | 0 | 0 | 0 | 0 | 0 |
| Otu00560 | 12 | 0  | 1 | 10 | 1  | 0  | 0  | 0 | 0  | 0  | 0  | 0 | 0 | 0 | 0 | 0 |
| Otu00561 | 35 | 0  | 0 | 0  | 0  | 0  | 0  | 0 | 35 | 0  | 0  | 0 | 0 | 0 | 0 | 0 |
| Otu00562 | 10 | 4  | 2 | 2  | 2  | 0  | 0  | 0 | 0  | 0  | 0  | 0 | 0 | 0 | 0 | 0 |
| Otu00563 | 10 | 0  | 0 | 0  | 0  | 3  | 0  | 1 | 0  | 4  | 2  | 0 | 0 | 0 | 0 | 0 |
| Otu00564 | 9  | 7  | 0 | 0  | 0  | 0  | 2  | 0 | 0  | 0  | 0  | 0 | 0 | 0 | 0 | 0 |
| Otu00565 | 29 | 0  | 0 | 0  | 0  | 0  | 0  | 0 | 0  | 0  | 23 | 6 | 0 | 0 | 0 | 0 |

Supplementary 1  
 Taxonomy and Abundance of OTUs (see taxonomy of OTUs in Table S1A)  
 Normalized data, identification according to blast UNITEv7

|          |    |   |   |   |   |    |    |    |    |    |   |   |   |   |    |    |   |
|----------|----|---|---|---|---|----|----|----|----|----|---|---|---|---|----|----|---|
| Otu00566 | 8  | 0 | 0 | 0 | 8 | 0  | 0  | 0  | 0  | 0  | 0 | 0 | 0 | 0 | 0  | 0  | 0 |
| Otu00567 | 4  | 0 | 0 | 0 | 0 | 4  | 0  | 0  | 0  | 0  | 0 | 0 | 0 | 0 | 0  | 0  | 0 |
| Otu00568 | 33 | 0 | 0 | 0 | 0 | 9  | 24 | 0  | 0  | 0  | 0 | 0 | 0 | 0 | 0  | 0  | 0 |
| Otu00569 | 16 | 8 | 6 | 2 | 0 | 0  | 0  | 0  | 0  | 0  | 0 | 0 | 0 | 0 | 0  | 0  | 0 |
| Otu00570 | 13 | 0 | 0 | 0 | 5 | 2  | 0  | 3  | 1  | 1  | 1 | 0 | 0 | 0 | 0  | 0  | 0 |
| Otu00571 | 21 | 0 | 0 | 0 | 0 | 1  | 0  | 0  | 8  | 1  | 0 | 0 | 0 | 0 | 0  | 11 | 0 |
| Otu00572 | 32 | 0 | 0 | 0 | 0 | 0  | 0  | 13 | 10 | 5  | 3 | 1 | 0 | 0 | 0  | 0  | 0 |
| Otu00573 | 27 | 0 | 0 | 0 | 0 | 0  | 0  | 9  | 5  | 4  | 8 | 1 | 0 | 0 | 0  | 0  | 0 |
| Otu00574 | 23 | 0 | 0 | 0 | 0 | 10 | 9  | 0  | 0  | 4  | 0 | 0 | 0 | 0 | 0  | 0  | 0 |
| Otu00575 | 19 | 0 | 0 | 0 | 0 | 6  | 4  | 2  | 1  | 1  | 2 | 1 | 0 | 2 | 0  | 0  | 0 |
| Otu00576 | 16 | 0 | 0 | 0 | 0 | 0  | 0  | 11 | 2  | 0  | 3 | 0 | 0 | 0 | 0  | 0  | 0 |
| Otu00577 | 29 | 0 | 0 | 0 | 0 | 0  | 4  | 5  | 7  | 7  | 5 | 0 | 0 | 0 | 0  | 1  | 0 |
| Otu00578 | 20 | 0 | 0 | 0 | 0 | 0  | 1  | 0  | 0  | 2  | 3 | 1 | 0 | 3 | 10 | 0  | 0 |
| Otu00579 | 10 | 0 | 0 | 0 | 9 | 0  | 1  | 0  | 0  | 0  | 0 | 0 | 0 | 0 | 0  | 0  | 0 |
| Otu00580 | 10 | 0 | 0 | 0 | 0 | 0  | 4  | 0  | 6  | 0  | 0 | 0 | 0 | 0 | 0  | 0  | 0 |
| Otu00581 | 7  | 0 | 0 | 2 | 5 | 0  | 0  | 0  | 0  | 0  | 0 | 0 | 0 | 0 | 0  | 0  | 0 |
| Otu00582 | 7  | 1 | 0 | 3 | 2 | 1  | 0  | 0  | 0  | 0  | 0 | 0 | 0 | 0 | 0  | 0  | 0 |
| Otu00583 | 19 | 0 | 0 | 0 | 0 | 1  | 4  | 2  | 3  | 3  | 2 | 3 | 0 | 1 | 0  | 0  | 0 |
| Otu00584 | 19 | 0 | 0 | 0 | 0 | 0  | 0  | 2  | 5  | 1  | 0 | 0 | 2 | 1 | 8  | 0  | 0 |
| Otu00585 | 25 | 0 | 0 | 1 | 1 | 1  | 3  | 0  | 2  | 7  | 9 | 1 | 0 | 0 | 0  | 0  | 0 |
| Otu00586 | 17 | 0 | 1 | 0 | 0 | 4  | 1  | 1  | 0  | 8  | 2 | 0 | 0 | 0 | 0  | 0  | 0 |
| Otu00587 | 22 | 0 | 0 | 0 | 0 | 8  | 0  | 3  | 9  | 2  | 0 | 0 | 0 | 0 | 0  | 0  | 0 |
| Otu00588 | 10 | 0 | 0 | 0 | 2 | 2  | 1  | 3  | 1  | 0  | 0 | 1 | 0 | 0 | 0  | 0  | 0 |
| Otu00589 | 12 | 0 | 5 | 4 | 3 | 0  | 0  | 0  | 0  | 0  | 0 | 0 | 0 | 0 | 0  | 0  | 0 |
| Otu00590 | 13 | 0 | 0 | 0 | 0 | 3  | 4  | 0  | 0  | 0  | 0 | 6 | 0 | 0 | 0  | 0  | 0 |
| Otu00591 | 28 | 0 | 0 | 0 | 0 | 0  | 0  | 24 | 0  | 0  | 1 | 0 | 0 | 0 | 0  | 3  | 0 |
| Otu00592 | 25 | 0 | 0 | 0 | 0 | 2  | 3  | 9  | 1  | 2  | 4 | 4 | 0 | 0 | 0  | 0  | 0 |
| Otu00593 | 27 | 0 | 0 | 0 | 0 | 4  | 15 | 0  | 1  | 3  | 0 | 2 | 1 | 0 | 0  | 0  | 1 |
| Otu00594 | 20 | 0 | 2 | 0 | 0 | 0  | 2  | 1  | 1  | 5  | 2 | 0 | 1 | 3 | 2  | 1  | 1 |
| Otu00595 | 30 | 0 | 0 | 0 | 0 | 0  | 0  | 10 | 1  | 15 | 0 | 0 | 4 | 0 | 0  | 0  | 0 |
| Otu00596 | 9  | 0 | 0 | 0 | 0 | 6  | 0  | 1  | 0  | 1  | 0 | 1 | 0 | 0 | 0  | 0  | 0 |
| Otu00597 | 3  | 3 | 0 | 0 | 0 | 0  | 0  | 0  | 0  | 0  | 0 | 0 | 0 | 0 | 0  | 0  | 0 |
| Otu00598 | 8  | 0 | 0 | 1 | 2 | 3  | 1  | 0  | 0  | 0  | 1 | 0 | 0 | 0 | 0  | 0  | 0 |
| Otu00599 | 24 | 0 | 0 | 0 | 0 | 1  | 4  | 2  | 8  | 5  | 1 | 1 | 1 | 1 | 0  | 0  | 0 |
| Otu00600 | 16 | 0 | 0 | 9 | 3 | 4  | 0  | 0  | 0  | 0  | 0 | 0 | 0 | 0 | 0  | 0  | 0 |
| Otu00601 | 16 | 0 | 0 | 0 | 0 | 1  | 1  | 0  | 4  | 0  | 1 | 0 | 0 | 2 | 7  | 0  | 0 |
| Otu00602 | 2  | 0 | 0 | 0 | 0 | 0  | 0  | 2  | 0  | 0  | 0 | 0 | 0 | 0 | 0  | 0  | 0 |
| Otu00603 | 10 | 0 | 5 | 4 | 1 | 0  | 0  | 0  | 0  | 0  | 0 | 0 | 0 | 0 | 0  | 0  | 0 |
| Otu00604 | 20 | 0 | 0 | 0 | 0 | 14 | 3  | 0  | 2  | 0  | 0 | 0 | 0 | 0 | 0  | 0  | 1 |
| Otu00605 | 19 | 0 | 0 | 0 | 0 | 17 | 1  | 0  | 0  | 0  | 0 | 1 | 0 | 0 | 0  | 0  | 0 |
| Otu00606 | 12 | 0 | 0 | 0 | 0 | 0  | 1  | 2  | 7  | 0  | 0 | 2 | 0 | 0 | 0  | 0  | 0 |
| Otu00607 | 22 | 0 | 0 | 0 | 0 | 0  | 0  | 0  | 18 | 4  | 0 | 0 | 0 | 0 | 0  | 0  | 0 |
| Otu00608 | 13 | 0 | 0 | 9 | 0 | 4  | 0  | 0  | 0  | 0  | 0 | 0 | 0 | 0 | 0  | 0  | 0 |

Supplementary 1  
 Taxonomy and Abundance of OTUs (see taxonomy of OTUs in Table S1A)  
 Normalized data, identification according to blast UNITEv7

|          |    |    |   |   |   |    |    |    |    |    |    |   |   |    |   |   |
|----------|----|----|---|---|---|----|----|----|----|----|----|---|---|----|---|---|
| Otu00609 | 29 | 0  | 0 | 0 | 0 | 0  | 0  | 0  | 0  | 29 | 0  | 0 | 0 | 0  | 0 | 0 |
| Otu00610 | 11 | 2  | 0 | 3 | 0 | 0  | 0  | 0  | 2  | 0  | 0  | 3 | 0 | 1  | 0 | 0 |
| Otu00611 | 15 | 15 | 0 | 0 | 0 | 0  | 0  | 0  | 0  | 0  | 0  | 0 | 0 | 0  | 0 | 0 |
| Otu00612 | 19 | 0  | 0 | 0 | 0 | 1  | 10 | 0  | 1  | 0  | 1  | 0 | 0 | 4  | 2 | 0 |
| Otu00613 | 8  | 0  | 0 | 0 | 0 | 5  | 0  | 0  | 0  | 1  | 0  | 1 | 1 | 0  | 0 | 0 |
| Otu00614 | 10 | 1  | 0 | 0 | 0 | 0  | 2  | 7  | 0  | 0  | 0  | 0 | 0 | 0  | 0 | 0 |
| Otu00615 | 28 | 0  | 0 | 0 | 0 | 0  | 0  | 11 | 0  | 12 | 5  | 0 | 0 | 0  | 0 | 0 |
| Otu00616 | 13 | 0  | 0 | 0 | 0 | 0  | 0  | 0  | 4  | 0  | 0  | 0 | 9 | 0  | 0 | 0 |
| Otu00617 | 18 | 0  | 0 | 0 | 0 | 1  | 1  | 0  | 0  | 3  | 0  | 4 | 4 | 0  | 0 | 5 |
| Otu00618 | 18 | 0  | 0 | 0 | 0 | 10 | 1  | 0  | 5  | 1  | 0  | 1 | 0 | 0  | 0 | 0 |
| Otu00619 | 19 | 0  | 0 | 0 | 0 | 2  | 4  | 5  | 1  | 2  | 3  | 2 | 0 | 0  | 0 | 0 |
| Otu00620 | 18 | 0  | 0 | 0 | 0 | 1  | 0  | 1  | 4  | 4  | 4  | 4 | 0 | 0  | 0 | 0 |
| Otu00621 | 13 | 0  | 0 | 0 | 0 | 8  | 4  | 0  | 0  | 1  | 0  | 0 | 0 | 0  | 0 | 0 |
| Otu00622 | 7  | 0  | 0 | 0 | 0 | 4  | 0  | 0  | 0  | 0  | 1  | 2 | 0 | 0  | 0 | 0 |
| Otu00623 | 8  | 0  | 0 | 0 | 0 | 0  | 0  | 0  | 0  | 0  | 0  | 0 | 0 | 8  | 0 | 0 |
| Otu00624 | 13 | 0  | 0 | 0 | 1 | 4  | 0  | 0  | 4  | 1  | 1  | 0 | 1 | 1  | 0 | 0 |
| Otu00625 | 12 | 0  | 7 | 2 | 3 | 0  | 0  | 0  | 0  | 0  | 0  | 0 | 0 | 0  | 0 | 0 |
| Otu00626 | 6  | 4  | 1 | 0 | 0 | 0  | 0  | 0  | 0  | 0  | 1  | 0 | 0 | 0  | 0 | 0 |
| Otu00628 | 2  | 0  | 2 | 0 | 0 | 0  | 0  | 0  | 0  | 0  | 0  | 0 | 0 | 0  | 0 | 0 |
| Otu00629 | 25 | 0  | 0 | 0 | 0 | 0  | 0  | 2  | 23 | 0  | 0  | 0 | 0 | 0  | 0 | 0 |
| Otu00630 | 27 | 0  | 0 | 0 | 0 | 0  | 0  | 0  | 0  | 0  | 27 | 0 | 0 | 0  | 0 | 0 |
| Otu00631 | 4  | 0  | 3 | 1 | 0 | 0  | 0  | 0  | 0  | 0  | 0  | 0 | 0 | 0  | 0 | 0 |
| Otu00632 | 21 | 0  | 0 | 0 | 0 | 1  | 2  | 1  | 0  | 9  | 6  | 1 | 1 | 0  | 0 | 0 |
| Otu00633 | 3  | 0  | 1 | 2 | 0 | 0  | 0  | 0  | 0  | 0  | 0  | 0 | 0 | 0  | 0 | 0 |
| Otu00634 | 27 | 0  | 0 | 0 | 0 | 0  | 0  | 9  | 18 | 0  | 0  | 0 | 0 | 0  | 0 | 0 |
| Otu00635 | 6  | 0  | 0 | 2 | 0 | 0  | 2  | 1  | 0  | 0  | 0  | 1 | 0 | 0  | 0 | 0 |
| Otu00636 | 11 | 5  | 3 | 2 | 0 | 0  | 0  | 0  | 0  | 0  | 1  | 0 | 0 | 0  | 0 | 0 |
| Otu00637 | 19 | 0  | 0 | 0 | 0 | 0  | 3  | 0  | 5  | 6  | 1  | 1 | 0 | 1  | 2 | 0 |
| Otu00638 | 4  | 0  | 0 | 0 | 0 | 0  | 1  | 0  | 3  | 0  | 0  | 0 | 0 | 0  | 0 | 0 |
| Otu00639 | 4  | 0  | 0 | 3 | 0 | 1  | 0  | 0  | 0  | 0  | 0  | 0 | 0 | 0  | 0 | 0 |
| Otu00640 | 12 | 0  | 0 | 0 | 0 | 8  | 0  | 1  | 1  | 2  | 0  | 0 | 0 | 0  | 0 | 0 |
| Otu00641 | 6  | 0  | 0 | 0 | 0 | 6  | 0  | 0  | 0  | 0  | 0  | 0 | 0 | 0  | 0 | 0 |
| Otu00642 | 18 | 0  | 0 | 0 | 0 | 1  | 4  | 0  | 4  | 6  | 2  | 0 | 0 | 0  | 1 | 0 |
| Otu00643 | 24 | 0  | 0 | 0 | 0 | 1  | 0  | 2  | 5  | 10 | 4  | 1 | 0 | 1  | 0 | 0 |
| Otu00644 | 15 | 0  | 0 | 0 | 0 | 0  | 1  | 1  | 0  | 0  | 0  | 1 | 2 | 4  | 6 | 0 |
| Otu00645 | 11 | 0  | 0 | 0 | 0 | 0  | 0  | 0  | 0  | 0  | 0  | 0 | 0 | 11 | 0 | 0 |
| Otu00646 | 21 | 0  | 0 | 0 | 0 | 0  | 1  | 0  | 5  | 9  | 3  | 3 | 0 | 0  | 0 | 0 |
| Otu00647 | 8  | 0  | 0 | 0 | 8 | 0  | 0  | 0  | 0  | 0  | 0  | 0 | 0 | 0  | 0 | 0 |
| Otu00648 | 10 | 0  | 0 | 0 | 2 | 4  | 3  | 0  | 0  | 0  | 1  | 0 | 0 | 0  | 0 | 0 |
| Otu00650 | 7  | 0  | 7 | 0 | 0 | 0  | 0  | 0  | 0  | 0  | 0  | 0 | 0 | 0  | 0 | 0 |
| Otu00651 | 24 | 0  | 0 | 0 | 0 | 0  | 3  | 16 | 2  | 0  | 1  | 1 | 0 | 1  | 0 | 0 |
| Otu00653 | 0  | 0  | 0 | 0 | 0 | 0  | 0  | 0  | 0  | 0  | 0  | 0 | 0 | 0  | 0 | 0 |
| Otu00654 | 6  | 0  | 0 | 0 | 0 | 1  | 1  | 0  | 0  | 4  | 0  | 0 | 0 | 0  | 0 | 0 |

Supplementary 1  
 Taxonomy and Abundance of OTUs (see taxonomy of OTUs in Table S1A)  
 Normalized data, identification according to blast UNITEv7

|          |    |    |   |   |   |   |   |    |    |    |   |    |    |   |    |   |   |
|----------|----|----|---|---|---|---|---|----|----|----|---|----|----|---|----|---|---|
| Otu00655 | 3  | 0  | 0 | 3 | 0 | 0 | 0 | 0  | 0  | 0  | 0 | 0  | 0  | 0 | 0  | 0 | 0 |
| Otu00656 | 8  | 0  | 0 | 0 | 0 | 2 | 0 | 0  | 0  | 0  | 0 | 0  | 0  | 6 | 0  | 0 | 0 |
| Otu00657 | 14 | 0  | 0 | 0 | 0 | 1 | 1 | 3  | 4  | 1  | 0 | 4  | 0  | 0 | 0  | 0 | 0 |
| Otu00659 | 13 | 0  | 0 | 0 | 0 | 0 | 3 | 0  | 0  | 0  | 0 | 0  | 10 | 0 | 0  | 0 | 0 |
| Otu00660 | 16 | 1  | 2 | 1 | 0 | 2 | 2 | 1  | 3  | 0  | 0 | 4  | 0  | 0 | 0  | 0 | 0 |
| Otu00661 | 8  | 0  | 0 | 0 | 0 | 0 | 3 | 1  | 1  | 3  | 0 | 0  | 0  | 0 | 0  | 0 | 0 |
| Otu00662 | 8  | 2  | 0 | 2 | 4 | 0 | 0 | 0  | 0  | 0  | 0 | 0  | 0  | 0 | 0  | 0 | 0 |
| Otu00663 | 17 | 0  | 0 | 0 | 0 | 0 | 0 | 0  | 0  | 0  | 0 | 4  | 0  | 0 | 13 | 0 | 0 |
| Otu00664 | 11 | 0  | 3 | 2 | 5 | 0 | 0 | 0  | 1  | 0  | 0 | 0  | 0  | 0 | 0  | 0 | 0 |
| Otu00665 | 7  | 1  | 2 | 4 | 0 | 0 | 0 | 0  | 0  | 0  | 0 | 0  | 0  | 0 | 0  | 0 | 0 |
| Otu00666 | 14 | 0  | 0 | 0 | 1 | 0 | 0 | 0  | 2  | 4  | 5 | 2  | 0  | 0 | 0  | 0 | 0 |
| Otu00668 | 6  | 0  | 0 | 0 | 5 | 0 | 1 | 0  | 0  | 0  | 0 | 0  | 0  | 0 | 0  | 0 | 0 |
| Otu00669 | 15 | 0  | 0 | 0 | 0 | 3 | 1 | 1  | 2  | 4  | 1 | 2  | 1  | 0 | 0  | 0 | 0 |
| Otu00670 | 3  | 0  | 0 | 0 | 3 | 0 | 0 | 0  | 0  | 0  | 0 | 0  | 0  | 0 | 0  | 0 | 0 |
| Otu00671 | 11 | 0  | 0 | 0 | 1 | 3 | 1 | 1  | 1  | 2  | 2 | 0  | 0  | 0 | 0  | 0 | 0 |
| Otu00672 | 24 | 0  | 0 | 0 | 0 | 0 | 3 | 0  | 0  | 0  | 0 | 21 | 0  | 0 | 0  | 0 | 0 |
| Otu00673 | 7  | 7  | 0 | 0 | 0 | 0 | 0 | 0  | 0  | 0  | 0 | 0  | 0  | 0 | 0  | 0 | 0 |
| Otu00674 | 9  | 0  | 0 | 0 | 0 | 7 | 0 | 0  | 1  | 0  | 0 | 1  | 0  | 0 | 0  | 0 | 0 |
| Otu00675 | 15 | 0  | 0 | 0 | 0 | 0 | 3 | 0  | 8  | 0  | 0 | 4  | 0  | 0 | 0  | 0 | 0 |
| Otu00676 | 1  | 0  | 0 | 0 | 1 | 0 | 0 | 0  | 0  | 0  | 0 | 0  | 0  | 0 | 0  | 0 | 0 |
| Otu00677 | 21 | 0  | 0 | 0 | 0 | 3 | 4 | 1  | 4  | 1  | 3 | 5  | 0  | 0 | 0  | 0 | 0 |
| Otu00678 | 6  | 0  | 0 | 4 | 2 | 0 | 0 | 0  | 0  | 0  | 0 | 0  | 0  | 0 | 0  | 0 | 0 |
| Otu00679 | 20 | 0  | 0 | 0 | 0 | 0 | 6 | 2  | 1  | 2  | 4 | 3  | 0  | 0 | 0  | 0 | 2 |
| Otu00680 | 5  | 0  | 5 | 0 | 0 | 0 | 0 | 0  | 0  | 0  | 0 | 0  | 0  | 0 | 0  | 0 | 0 |
| Otu00681 | 8  | 0  | 0 | 0 | 1 | 0 | 1 | 0  | 0  | 4  | 0 | 1  | 0  | 0 | 1  | 0 | 0 |
| Otu00683 | 20 | 0  | 0 | 0 | 0 | 4 | 6 | 0  | 9  | 1  | 0 | 0  | 0  | 0 | 0  | 0 | 0 |
| Otu00684 | 17 | 0  | 0 | 3 | 1 | 1 | 0 | 4  | 2  | 4  | 0 | 2  | 0  | 0 | 0  | 0 | 0 |
| Otu00685 | 3  | 0  | 0 | 0 | 1 | 2 | 0 | 0  | 0  | 0  | 0 | 0  | 0  | 0 | 0  | 0 | 0 |
| Otu00686 | 22 | 0  | 0 | 0 | 0 | 0 | 9 | 0  | 1  | 12 | 0 | 0  | 0  | 0 | 0  | 0 | 0 |
| Otu00687 | 12 | 0  | 0 | 0 | 7 | 0 | 4 | 1  | 0  | 0  | 0 | 0  | 0  | 0 | 0  | 0 | 0 |
| Otu00688 | 23 | 0  | 0 | 0 | 0 | 0 | 0 | 11 | 0  | 11 | 0 | 0  | 1  | 0 | 0  | 0 | 0 |
| Otu00689 | 0  | 0  | 0 | 0 | 0 | 0 | 0 | 0  | 0  | 0  | 0 | 0  | 0  | 0 | 0  | 0 | 0 |
| Otu00690 | 10 | 10 | 0 | 0 | 0 | 0 | 0 | 0  | 0  | 0  | 0 | 0  | 0  | 0 | 0  | 0 | 0 |
| Otu00691 | 21 | 0  | 0 | 0 | 0 | 0 | 0 | 0  | 17 | 1  | 2 | 0  | 0  | 0 | 0  | 0 | 1 |
| Otu00692 | 16 | 0  | 0 | 0 | 1 | 1 | 0 | 3  | 3  | 8  | 0 | 0  | 0  | 0 | 0  | 0 | 0 |
| Otu00693 | 19 | 0  | 0 | 0 | 0 | 2 | 0 | 6  | 3  | 1  | 6 | 1  | 0  | 0 | 0  | 0 | 0 |
| Otu00694 | 8  | 0  | 0 | 0 | 8 | 0 | 0 | 0  | 0  | 0  | 0 | 0  | 0  | 0 | 0  | 0 | 0 |
| Otu00695 | 20 | 0  | 0 | 0 | 0 | 0 | 0 | 0  | 16 | 0  | 0 | 4  | 0  | 0 | 0  | 0 | 0 |
| Otu00696 | 17 | 0  | 0 | 0 | 0 | 0 | 1 | 2  | 3  | 0  | 6 | 5  | 0  | 0 | 0  | 0 | 0 |
| Otu00697 | 8  | 2  | 6 | 0 | 0 | 0 | 0 | 0  | 0  | 0  | 0 | 0  | 0  | 0 | 0  | 0 | 0 |
| Otu00698 | 22 | 0  | 0 | 0 | 0 | 6 | 4 | 1  | 2  | 4  | 3 | 2  | 0  | 0 | 0  | 0 | 0 |
| Otu00699 | 11 | 0  | 0 | 0 | 1 | 0 | 1 | 2  | 2  | 2  | 3 | 0  | 0  | 0 | 0  | 0 | 0 |
| Otu00700 | 10 | 0  | 0 | 3 | 5 | 2 | 0 | 0  | 0  | 0  | 0 | 0  | 0  | 0 | 0  | 0 | 0 |



Supplementary 1  
 Taxonomy and Abundance of OTUs (see taxonomy of OTUs in Table S1A)  
 Normalized data, identification according to blast UNITEv7

|          |    |    |   |   |   |   |   |    |    |   |   |    |   |   |   |   |
|----------|----|----|---|---|---|---|---|----|----|---|---|----|---|---|---|---|
| Otu00701 | 4  | 0  | 2 | 0 | 0 | 1 | 0 | 0  | 0  | 1 | 0 | 0  | 0 | 0 | 0 | 0 |
| Otu00702 | 7  | 0  | 0 | 0 | 0 | 0 | 0 | 0  | 0  | 0 | 0 | 7  | 0 | 0 | 0 | 0 |
| Otu00703 | 14 | 0  | 0 | 0 | 0 | 1 | 6 | 0  | 3  | 1 | 0 | 1  | 0 | 0 | 0 | 2 |
| Otu00704 | 3  | 0  | 0 | 0 | 3 | 0 | 0 | 0  | 0  | 0 | 0 | 0  | 0 | 0 | 0 | 0 |
| Otu00705 | 12 | 0  | 0 | 0 | 1 | 3 | 1 | 0  | 5  | 0 | 0 | 1  | 1 | 0 | 0 | 0 |
| Otu00706 | 6  | 0  | 0 | 0 | 0 | 0 | 0 | 0  | 0  | 0 | 0 | 0  | 0 | 5 | 1 | 0 |
| Otu00707 | 22 | 0  | 0 | 0 | 0 | 0 | 1 | 0  | 21 | 0 | 0 | 0  | 0 | 0 | 0 | 0 |
| Otu00708 | 20 | 0  | 0 | 0 | 0 | 0 | 0 | 11 | 0  | 6 | 3 | 0  | 0 | 0 | 0 | 0 |
| Otu00709 | 9  | 0  | 9 | 0 | 0 | 0 | 0 | 0  | 0  | 0 | 0 | 0  | 0 | 0 | 0 | 0 |
| Otu00710 | 15 | 0  | 0 | 0 | 0 | 4 | 6 | 0  | 1  | 0 | 4 | 0  | 0 | 0 | 0 | 0 |
| Otu00711 | 12 | 12 | 0 | 0 | 0 | 0 | 0 | 0  | 0  | 0 | 0 | 0  | 0 | 0 | 0 | 0 |
| Otu00712 | 13 | 0  | 1 | 0 | 0 | 5 | 1 | 1  | 1  | 2 | 2 | 0  | 0 | 0 | 0 | 0 |
| Otu00713 | 2  | 2  | 0 | 0 | 0 | 0 | 0 | 0  | 0  | 0 | 0 | 0  | 0 | 0 | 0 | 0 |
| Otu00714 | 1  | 0  | 0 | 0 | 0 | 0 | 0 | 1  | 0  | 0 | 0 | 0  | 0 | 0 | 0 | 0 |
| Otu00715 | 4  | 0  | 0 | 1 | 2 | 1 | 0 | 0  | 0  | 0 | 0 | 0  | 0 | 0 | 0 | 0 |
| Otu00716 | 8  | 0  | 0 | 0 | 0 | 0 | 2 | 2  | 0  | 0 | 0 | 2  | 2 | 0 | 0 | 0 |
| Otu00717 | 1  | 0  | 0 | 0 | 0 | 1 | 0 | 0  | 0  | 0 | 0 | 0  | 0 | 0 | 0 | 0 |
| Otu00718 | 5  | 0  | 0 | 0 | 0 | 0 | 0 | 3  | 0  | 1 | 0 | 0  | 0 | 1 | 0 | 0 |
| Otu00719 | 18 | 0  | 0 | 0 | 0 | 0 | 0 | 8  | 4  | 3 | 3 | 0  | 0 | 0 | 0 | 0 |
| Otu00720 | 19 | 0  | 0 | 0 | 0 | 0 | 2 | 0  | 3  | 0 | 0 | 14 | 0 | 0 | 0 | 0 |
| Otu00721 | 2  | 0  | 0 | 0 | 2 | 0 | 0 | 0  | 0  | 0 | 0 | 0  | 0 | 0 | 0 | 0 |
| Otu00722 | 9  | 0  | 0 | 0 | 0 | 8 | 0 | 0  | 0  | 0 | 0 | 1  | 0 | 0 | 0 | 0 |
| Otu00723 | 4  | 0  | 4 | 0 | 0 | 0 | 0 | 0  | 0  | 0 | 0 | 0  | 0 | 0 | 0 | 0 |
| Otu00724 | 2  | 0  | 0 | 0 | 2 | 0 | 0 | 0  | 0  | 0 | 0 | 0  | 0 | 0 | 0 | 0 |
| Otu00725 | 8  | 0  | 0 | 0 | 0 | 0 | 0 | 0  | 0  | 0 | 0 | 0  | 0 | 0 | 8 | 0 |
| Otu00726 | 2  | 0  | 0 | 0 | 0 | 0 | 0 | 2  | 0  | 0 | 0 | 0  | 0 | 0 | 0 | 0 |
| Otu00727 | 14 | 0  | 0 | 0 | 0 | 1 | 0 | 4  | 0  | 3 | 4 | 2  | 0 | 0 | 0 | 0 |
| Otu00728 | 7  | 0  | 1 | 0 | 6 | 0 | 0 | 0  | 0  | 0 | 0 | 0  | 0 | 0 | 0 | 0 |
| Otu00729 | 16 | 0  | 0 | 0 | 0 | 0 | 0 | 0  | 9  | 6 | 0 | 0  | 0 | 1 | 0 | 0 |
| Otu00730 | 14 | 0  | 0 | 0 | 0 | 0 | 0 | 0  | 5  | 0 | 0 | 3  | 0 | 6 | 0 | 0 |
| Otu00731 | 2  | 0  | 0 | 0 | 2 | 0 | 0 | 0  | 0  | 0 | 0 | 0  | 0 | 0 | 0 | 0 |
| Otu00732 | 15 | 2  | 0 | 7 | 0 | 1 | 0 | 0  | 4  | 0 | 1 | 0  | 0 | 0 | 0 | 0 |
| Otu00733 | 19 | 0  | 0 | 0 | 0 | 0 | 0 | 0  | 18 | 0 | 0 | 0  | 0 | 0 | 1 | 0 |
| Otu00734 | 1  | 0  | 0 | 0 | 1 | 0 | 0 | 0  | 0  | 0 | 0 | 0  | 0 | 0 | 0 | 0 |
| Otu00735 | 7  | 0  | 0 | 0 | 0 | 0 | 0 | 0  | 0  | 0 | 0 | 0  | 0 | 0 | 7 | 0 |
| Otu00736 | 3  | 0  | 2 | 1 | 0 | 0 | 0 | 0  | 0  | 0 | 0 | 0  | 0 | 0 | 0 | 0 |
| Otu00737 | 15 | 0  | 0 | 0 | 1 | 3 | 0 | 1  | 3  | 2 | 4 | 1  | 0 | 0 | 0 | 0 |
| Otu00738 | 17 | 0  | 0 | 0 | 0 | 4 | 5 | 0  | 4  | 0 | 0 | 4  | 0 | 0 | 0 | 0 |
| Otu00739 | 8  | 0  | 7 | 1 | 0 | 0 | 0 | 0  | 0  | 0 | 0 | 0  | 0 | 0 | 0 | 0 |
| Otu00740 | 8  | 0  | 0 | 0 | 0 | 0 | 0 | 0  | 0  | 0 | 0 | 0  | 0 | 8 | 0 | 0 |
| Otu00741 | 9  | 0  | 0 | 1 | 0 | 6 | 0 | 2  | 0  | 0 | 0 | 0  | 0 | 0 | 0 | 0 |
| Otu00742 | 0  | 0  | 0 | 0 | 0 | 0 | 0 | 0  | 0  | 0 | 0 | 0  | 0 | 0 | 0 | 0 |
| Otu00743 | 7  | 0  | 0 | 0 | 0 | 2 | 3 | 0  | 0  | 0 | 2 | 0  | 0 | 0 | 0 | 0 |

Supplementary 1  
 Taxonomy and Abundance of OTUs (see taxonomy of OTUs in Table S1A)  
 Normalized data, identification according to blast UNITEv7

|          |    |    |   |    |   |   |    |   |    |   |    |   |   |   |   |   |
|----------|----|----|---|----|---|---|----|---|----|---|----|---|---|---|---|---|
| Otu00744 | 9  | 0  | 0 | 1  | 0 | 7 | 0  | 0 | 0  | 0 | 0  | 0 | 1 | 0 | 0 | 0 |
| Otu00745 | 18 | 0  | 0 | 0  | 0 | 0 | 2  | 0 | 2  | 0 | 13 | 1 | 0 | 0 | 0 | 0 |
| Otu00746 | 15 | 0  | 0 | 0  | 0 | 1 | 0  | 4 | 4  | 3 | 2  | 0 | 1 | 0 | 0 | 0 |
| Otu00747 | 9  | 0  | 0 | 0  | 0 | 0 | 0  | 0 | 0  | 0 | 0  | 0 | 0 | 1 | 8 | 0 |
| Otu00748 | 15 | 0  | 0 | 0  | 0 | 0 | 5  | 0 | 6  | 0 | 0  | 2 | 0 | 1 | 1 | 0 |
| Otu00749 | 9  | 0  | 0 | 0  | 9 | 0 | 0  | 0 | 0  | 0 | 0  | 0 | 0 | 0 | 0 | 0 |
| Otu00750 | 7  | 0  | 3 | 1  | 0 | 0 | 2  | 0 | 0  | 0 | 0  | 1 | 0 | 0 | 0 | 0 |
| Otu00751 | 15 | 1  | 2 | 9  | 0 | 0 | 1  | 0 | 0  | 0 | 2  | 0 | 0 | 0 | 0 | 0 |
| Otu00753 | 15 | 0  | 0 | 0  | 0 | 3 | 3  | 1 | 7  | 1 | 0  | 0 | 0 | 0 | 0 | 0 |
| Otu00754 | 5  | 0  | 0 | 3  | 1 | 1 | 0  | 0 | 0  | 0 | 0  | 0 | 0 | 0 | 0 | 0 |
| Otu00755 | 10 | 0  | 0 | 1  | 0 | 1 | 1  | 0 | 1  | 3 | 0  | 1 | 1 | 1 | 0 | 0 |
| Otu00756 | 13 | 0  | 0 | 0  | 0 | 0 | 5  | 5 | 1  | 1 | 0  | 1 | 0 | 0 | 0 | 0 |
| Otu00757 | 19 | 0  | 0 | 0  | 0 | 1 | 0  | 5 | 3  | 6 | 4  | 0 | 0 | 0 | 0 | 0 |
| Otu00758 | 9  | 0  | 0 | 0  | 0 | 0 | 0  | 0 | 1  | 4 | 3  | 0 | 0 | 0 | 0 | 1 |
| Otu00759 | 2  | 0  | 0 | 2  | 0 | 0 | 0  | 0 | 0  | 0 | 0  | 0 | 0 | 0 | 0 | 0 |
| Otu00760 | 14 | 0  | 0 | 0  | 0 | 0 | 0  | 0 | 12 | 0 | 0  | 0 | 2 | 0 | 0 | 0 |
| Otu00761 | 0  | 0  | 0 | 0  | 0 | 0 | 0  | 0 | 0  | 0 | 0  | 0 | 0 | 0 | 0 | 0 |
| Otu00762 | 13 | 0  | 0 | 0  | 0 | 5 | 1  | 1 | 1  | 3 | 0  | 2 | 0 | 0 | 0 | 0 |
| Otu00763 | 6  | 1  | 1 | 4  | 0 | 0 | 0  | 0 | 0  | 0 | 0  | 0 | 0 | 0 | 0 | 0 |
| Otu00764 | 8  | 0  | 0 | 1  | 7 | 0 | 0  | 0 | 0  | 0 | 0  | 0 | 0 | 0 | 0 | 0 |
| Otu00765 | 8  | 0  | 0 | 0  | 0 | 0 | 0  | 0 | 5  | 3 | 0  | 0 | 0 | 0 | 0 | 0 |
| Otu00766 | 5  | 0  | 0 | 0  | 0 | 0 | 1  | 0 | 1  | 0 | 0  | 0 | 0 | 1 | 2 | 0 |
| Otu00767 | 7  | 0  | 0 | 0  | 0 | 3 | 0  | 2 | 2  | 0 | 0  | 0 | 0 | 0 | 0 | 0 |
| Otu00768 | 1  | 0  | 0 | 0  | 0 | 0 | 0  | 1 | 0  | 0 | 0  | 0 | 0 | 0 | 0 | 0 |
| Otu00769 | 2  | 1  | 0 | 0  | 0 | 0 | 0  | 0 | 1  | 0 | 0  | 0 | 0 | 0 | 0 | 0 |
| Otu00770 | 15 | 0  | 0 | 0  | 0 | 0 | 1  | 3 | 3  | 3 | 5  | 0 | 0 | 0 | 0 | 0 |
| Otu00771 | 7  | 0  | 0 | 0  | 0 | 3 | 2  | 1 | 0  | 0 | 1  | 0 | 0 | 0 | 0 | 0 |
| Otu00772 | 16 | 0  | 0 | 0  | 0 | 0 | 15 | 0 | 1  | 0 | 0  | 0 | 0 | 0 | 0 | 0 |
| Otu00773 | 7  | 0  | 1 | 4  | 2 | 0 | 0  | 0 | 0  | 0 | 0  | 0 | 0 | 0 | 0 | 0 |
| Otu00774 | 7  | 0  | 0 | 0  | 0 | 4 | 2  | 0 | 0  | 1 | 0  | 0 | 0 | 0 | 0 | 0 |
| Otu00775 | 15 | 0  | 0 | 0  | 0 | 0 | 1  | 1 | 6  | 3 | 2  | 0 | 2 | 0 | 0 | 0 |
| Otu00776 | 8  | 1  | 0 | 1  | 0 | 1 | 0  | 0 | 1  | 1 | 1  | 1 | 1 | 0 | 0 | 0 |
| Otu00777 | 5  | 1  | 2 | 2  | 0 | 0 | 0  | 0 | 0  | 0 | 0  | 0 | 0 | 0 | 0 | 0 |
| Otu00778 | 11 | 0  | 0 | 11 | 0 | 0 | 0  | 0 | 0  | 0 | 0  | 0 | 0 | 0 | 0 | 0 |
| Otu00779 | 10 | 0  | 0 | 0  | 0 | 0 | 0  | 5 | 1  | 0 | 4  | 0 | 0 | 0 | 0 | 0 |
| Otu00780 | 14 | 0  | 0 | 0  | 0 | 1 | 1  | 3 | 0  | 5 | 4  | 0 | 0 | 0 | 0 | 0 |
| Otu00781 | 8  | 0  | 0 | 0  | 0 | 0 | 0  | 1 | 0  | 1 | 0  | 0 | 0 | 6 | 0 | 0 |
| Otu00782 | 1  | 0  | 0 | 1  | 0 | 0 | 0  | 0 | 0  | 0 | 0  | 0 | 0 | 0 | 0 | 0 |
| Otu00783 | 3  | 0  | 1 | 0  | 2 | 0 | 0  | 0 | 0  | 0 | 0  | 0 | 0 | 0 | 0 | 0 |
| Otu00784 | 8  | 0  | 1 | 7  | 0 | 0 | 0  | 0 | 0  | 0 | 0  | 0 | 0 | 0 | 0 | 0 |
| Otu00785 | 16 | 16 | 0 | 0  | 0 | 0 | 0  | 0 | 0  | 0 | 0  | 0 | 0 | 0 | 0 | 0 |
| Otu00786 | 12 | 0  | 0 | 0  | 0 | 0 | 4  | 1 | 0  | 3 | 4  | 0 | 0 | 0 | 0 | 0 |
| Otu00787 | 8  | 0  | 0 | 0  | 0 | 6 | 2  | 0 | 0  | 0 | 0  | 0 | 0 | 0 | 0 | 0 |

Supplementary 1  
 Taxonomy and Abundance of OTUs (see taxonomy of OTUs in Table S1A)  
 Normalized data, identification according to blast UNITEv7

|          |    |   |   |    |   |    |   |   |    |    |    |   |   |   |   |   |   |
|----------|----|---|---|----|---|----|---|---|----|----|----|---|---|---|---|---|---|
| Otu00788 | 3  | 0 | 0 | 0  | 3 | 0  | 0 | 0 | 0  | 0  | 0  | 0 | 0 | 0 | 0 | 0 | 0 |
| Otu00789 | 13 | 0 | 0 | 0  | 0 | 0  | 0 | 0 | 0  | 8  | 4  | 0 | 0 | 0 | 0 | 0 | 1 |
| Otu00791 | 11 | 0 | 1 | 0  | 0 | 1  | 5 | 1 | 1  | 0  | 1  | 1 | 0 | 0 | 0 | 0 |   |
| Otu00792 | 5  | 0 | 1 | 2  | 2 | 0  | 0 | 0 | 0  | 0  | 0  | 0 | 0 | 0 | 0 | 0 |   |
| Otu00793 | 8  | 0 | 0 | 0  | 0 | 0  | 2 | 1 | 1  | 0  | 1  | 1 | 2 | 0 | 0 | 0 |   |
| Otu00794 | 12 | 0 | 0 | 0  | 0 | 3  | 3 | 1 | 2  | 2  | 1  | 0 | 0 | 0 | 0 | 0 |   |
| Otu00795 | 11 | 0 | 0 | 0  | 0 | 0  | 0 | 1 | 0  | 1  | 0  | 0 | 0 | 0 | 9 | 0 |   |
| Otu00796 | 11 | 0 | 0 | 0  | 0 | 0  | 1 | 0 | 0  | 0  | 7  | 1 | 0 | 0 | 2 | 0 |   |
| Otu00797 | 5  | 0 | 0 | 0  | 0 | 1  | 0 | 1 | 0  | 3  | 0  | 0 | 0 | 0 | 0 | 0 |   |
| Otu00798 | 3  | 0 | 0 | 0  | 1 | 2  | 0 | 0 | 0  | 0  | 0  | 0 | 0 | 0 | 0 | 0 |   |
| Otu00799 | 1  | 0 | 0 | 1  | 0 | 0  | 0 | 0 | 0  | 0  | 0  | 0 | 0 | 0 | 0 | 0 |   |
| Otu00800 | 7  | 0 | 1 | 0  | 0 | 4  | 0 | 2 | 0  | 0  | 0  | 0 | 0 | 0 | 0 | 0 |   |
| Otu00801 | 14 | 0 | 0 | 0  | 0 | 3  | 0 | 0 | 0  | 9  | 2  | 0 | 0 | 0 | 0 | 0 |   |
| Otu00802 | 4  | 0 | 0 | 1  | 3 | 0  | 0 | 0 | 0  | 0  | 0  | 0 | 0 | 0 | 0 | 0 |   |
| Otu00803 | 12 | 0 | 0 | 0  | 1 | 3  | 3 | 0 | 4  | 0  | 0  | 0 | 1 | 0 | 0 | 0 |   |
| Otu00804 | 12 | 4 | 0 | 1  | 0 | 0  | 1 | 2 | 2  | 1  | 1  | 0 | 0 | 0 | 0 | 0 |   |
| Otu00805 | 1  | 0 | 1 | 0  | 0 | 0  | 0 | 0 | 0  | 0  | 0  | 0 | 0 | 0 | 0 | 0 |   |
| Otu00806 | 8  | 1 | 0 | 0  | 0 | 1  | 1 | 0 | 0  | 4  | 0  | 0 | 0 | 0 | 1 | 0 |   |
| Otu00807 | 4  | 0 | 0 | 3  | 1 | 0  | 0 | 0 | 0  | 0  | 0  | 0 | 0 | 0 | 0 | 0 |   |
| Otu00808 | 14 | 0 | 0 | 0  | 0 | 0  | 3 | 0 | 3  | 5  | 2  | 0 | 1 | 0 | 0 | 0 |   |
| Otu00809 | 0  | 0 | 0 | 0  | 0 | 0  | 0 | 0 | 0  | 0  | 0  | 0 | 0 | 0 | 0 | 0 |   |
| Otu00810 | 5  | 0 | 0 | 2  | 0 | 0  | 0 | 0 | 0  | 1  | 0  | 1 | 0 | 0 | 1 | 0 |   |
| Otu00811 | 14 | 0 | 0 | 0  | 0 | 0  | 0 | 2 | 0  | 0  | 3  | 0 | 0 | 2 | 7 | 0 |   |
| Otu00812 | 7  | 0 | 0 | 0  | 0 | 2  | 0 | 1 | 4  | 0  | 0  | 0 | 0 | 0 | 0 | 0 |   |
| Otu00813 | 16 | 0 | 0 | 0  | 0 | 0  | 0 | 4 | 0  | 1  | 11 | 0 | 0 | 0 | 0 | 0 |   |
| Otu00814 | 3  | 0 | 0 | 0  | 0 | 1  | 0 | 0 | 0  | 0  | 2  | 0 | 0 | 0 | 0 | 0 |   |
| Otu00815 | 14 | 0 | 0 | 0  | 0 | 0  | 1 | 6 | 6  | 1  | 0  | 0 | 0 | 0 | 0 | 0 |   |
| Otu00816 | 17 | 0 | 0 | 0  | 0 | 0  | 0 | 0 | 17 | 0  | 0  | 0 | 0 | 0 | 0 | 0 |   |
| Otu00817 | 1  | 1 | 0 | 0  | 0 | 0  | 0 | 0 | 0  | 0  | 0  | 0 | 0 | 0 | 0 | 0 |   |
| Otu00818 | 12 | 0 | 0 | 0  | 0 | 12 | 0 | 0 | 0  | 0  | 0  | 0 | 0 | 0 | 0 | 0 |   |
| Otu00819 | 16 | 0 | 0 | 0  | 0 | 0  | 0 | 0 | 16 | 0  | 0  | 0 | 0 | 0 | 0 | 0 |   |
| Otu00820 | 11 | 0 | 0 | 1  | 0 | 3  | 0 | 2 | 3  | 1  | 1  | 0 | 0 | 0 | 0 | 0 |   |
| Otu00821 | 12 | 0 | 0 | 11 | 0 | 0  | 0 | 0 | 1  | 0  | 0  | 0 | 0 | 0 | 0 | 0 |   |
| Otu00822 | 14 | 0 | 0 | 0  | 0 | 5  | 8 | 0 | 0  | 1  | 0  | 0 | 0 | 0 | 0 | 0 |   |
| Otu00823 | 4  | 0 | 0 | 0  | 0 | 3  | 1 | 0 | 0  | 0  | 0  | 0 | 0 | 0 | 0 | 0 |   |
| Otu00824 | 13 | 0 | 0 | 0  | 0 | 1  | 3 | 1 | 2  | 3  | 1  | 0 | 0 | 0 | 2 | 0 |   |
| Otu00825 | 17 | 0 | 0 | 0  | 0 | 0  | 3 | 0 | 0  | 14 | 0  | 0 | 0 | 0 | 0 | 0 |   |
| Otu00826 | 13 | 0 | 0 | 0  | 0 | 0  | 0 | 2 | 5  | 5  | 1  | 0 | 0 | 0 | 0 | 0 |   |
| Otu00827 | 11 | 0 | 5 | 2  | 3 | 0  | 0 | 0 | 1  | 0  | 0  | 0 | 0 | 0 | 0 | 0 |   |
| Otu00828 | 8  | 0 | 0 | 0  | 1 | 6  | 0 | 1 | 0  | 0  | 0  | 0 | 0 | 0 | 0 | 0 |   |
| Otu00829 | 15 | 0 | 0 | 0  | 0 | 0  | 0 | 2 | 8  | 0  | 0  | 5 | 0 | 0 | 0 | 0 |   |
| Otu00831 | 12 | 0 | 0 | 0  | 0 | 0  | 0 | 3 | 5  | 0  | 1  | 2 | 0 | 0 | 1 | 0 |   |
| Otu00832 | 9  | 0 | 0 | 0  | 2 | 4  | 2 | 0 | 1  | 0  | 0  | 0 | 0 | 0 | 0 | 0 |   |

Supplementary 1  
 Taxonomy and Abundance of OTUs (see taxonomy of OTUs in Table S1A)  
 Normalized data, identification according to blast UNITEv7

|          |    |   |    |   |   |    |   |    |   |   |    |   |   |   |   |   |
|----------|----|---|----|---|---|----|---|----|---|---|----|---|---|---|---|---|
| Otu00833 | 14 | 0 | 0  | 0 | 0 | 1  | 0 | 1  | 1 | 5 | 2  | 4 | 0 | 0 | 0 | 0 |
| Otu00834 | 14 | 0 | 0  | 0 | 0 | 0  | 0 | 0  | 0 | 1 | 13 | 0 | 0 | 0 | 0 | 0 |
| Otu00835 | 7  | 0 | 0  | 0 | 0 | 1  | 2 | 0  | 1 | 2 | 0  | 1 | 0 | 0 | 0 | 0 |
| Otu00836 | 13 | 0 | 0  | 0 | 0 | 0  | 1 | 0  | 0 | 4 | 6  | 0 | 2 | 0 | 0 | 0 |
| Otu00837 | 16 | 0 | 0  | 0 | 0 | 0  | 0 | 16 | 0 | 0 | 0  | 0 | 0 | 0 | 0 | 0 |
| Otu00838 | 12 | 0 | 0  | 0 | 4 | 0  | 4 | 1  | 0 | 0 | 3  | 0 | 0 | 0 | 0 | 0 |
| Otu00839 | 14 | 0 | 0  | 0 | 0 | 0  | 1 | 3  | 2 | 7 | 0  | 1 | 0 | 0 | 0 | 0 |
| Otu00840 | 15 | 0 | 0  | 0 | 0 | 1  | 2 | 1  | 0 | 3 | 6  | 1 | 0 | 0 | 1 | 0 |
| Otu00841 | 10 | 0 | 0  | 0 | 0 | 0  | 0 | 2  | 0 | 0 | 0  | 8 | 0 | 0 | 0 | 0 |
| Otu00842 | 11 | 0 | 0  | 0 | 0 | 0  | 0 | 0  | 0 | 3 | 6  | 0 | 0 | 0 | 2 | 0 |
| Otu00843 | 3  | 0 | 0  | 0 | 3 | 0  | 0 | 0  | 0 | 0 | 0  | 0 | 0 | 0 | 0 | 0 |
| Otu00844 | 3  | 0 | 3  | 0 | 0 | 0  | 0 | 0  | 0 | 0 | 0  | 0 | 0 | 0 | 0 | 0 |
| Otu00845 | 12 | 0 | 12 | 0 | 0 | 0  | 0 | 0  | 0 | 0 | 0  | 0 | 0 | 0 | 0 | 0 |
| Otu00846 | 16 | 0 | 0  | 0 | 0 | 0  | 0 | 0  | 9 | 3 | 2  | 1 | 1 | 0 | 0 | 0 |
| Otu00847 | 15 | 0 | 0  | 1 | 0 | 0  | 1 | 2  | 1 | 4 | 1  | 3 | 0 | 1 | 0 | 1 |
| Otu00848 | 13 | 0 | 0  | 0 | 0 | 0  | 1 | 0  | 8 | 0 | 2  | 2 | 0 | 0 | 0 | 0 |
| Otu00850 | 7  | 0 | 0  | 0 | 0 | 3  | 0 | 1  | 0 | 1 | 2  | 0 | 0 | 0 | 0 | 0 |
| Otu00851 | 12 | 0 | 0  | 0 | 0 | 11 | 1 | 0  | 0 | 0 | 0  | 0 | 0 | 0 | 0 | 0 |
| Otu00852 | 11 | 0 | 0  | 0 | 0 | 0  | 0 | 0  | 2 | 1 | 2  | 0 | 1 | 2 | 3 | 0 |
| Otu00853 | 5  | 0 | 0  | 0 | 0 | 0  | 0 | 0  | 1 | 1 | 0  | 3 | 0 | 0 | 0 | 0 |
| Otu00854 | 13 | 0 | 0  | 0 | 0 | 3  | 0 | 4  | 1 | 3 | 1  | 0 | 0 | 0 | 0 | 1 |
| Otu00855 | 13 | 0 | 0  | 0 | 0 | 3  | 1 | 2  | 3 | 2 | 2  | 0 | 0 | 0 | 0 | 0 |
| Otu00857 | 12 | 0 | 0  | 0 | 0 | 0  | 0 | 2  | 3 | 4 | 2  | 1 | 0 | 0 | 0 | 0 |
| Otu00858 | 15 | 0 | 0  | 0 | 0 | 1  | 0 | 2  | 0 | 3 | 9  | 0 | 0 | 0 | 0 | 0 |
| Otu00860 | 12 | 0 | 0  | 0 | 0 | 9  | 3 | 0  | 0 | 0 | 0  | 0 | 0 | 0 | 0 | 0 |
| Otu00861 | 9  | 0 | 0  | 0 | 0 | 1  | 2 | 0  | 1 | 0 | 4  | 0 | 0 | 0 | 1 | 0 |
| Otu00862 | 2  | 0 | 0  | 0 | 0 | 0  | 0 | 0  | 0 | 1 | 0  | 0 | 1 | 0 | 0 | 0 |
| Otu00863 | 13 | 0 | 0  | 0 | 0 | 0  | 1 | 2  | 3 | 6 | 1  | 0 | 0 | 0 | 0 | 0 |
| Otu00864 | 13 | 0 | 0  | 0 | 0 | 1  | 0 | 3  | 2 | 2 | 2  | 3 | 0 | 0 | 0 | 0 |
| Otu00865 | 13 | 0 | 0  | 0 | 0 | 0  | 2 | 2  | 1 | 7 | 1  | 0 | 0 | 0 | 0 | 0 |
| Otu00866 | 5  | 0 | 0  | 0 | 0 | 0  | 0 | 0  | 0 | 0 | 0  | 0 | 5 | 0 | 0 | 0 |
| Otu00867 | 10 | 0 | 0  | 0 | 0 | 5  | 4 | 0  | 1 | 0 | 0  | 0 | 0 | 0 | 0 | 0 |
| Otu00868 | 5  | 0 | 0  | 5 | 0 | 0  | 0 | 0  | 0 | 0 | 0  | 0 | 0 | 0 | 0 | 0 |
| Otu00869 | 13 | 0 | 0  | 0 | 0 | 0  | 1 | 2  | 2 | 2 | 6  | 0 | 0 | 0 | 0 | 0 |
| Otu00870 | 8  | 0 | 0  | 0 | 0 | 0  | 0 | 4  | 0 | 1 | 0  | 1 | 0 | 2 | 0 | 0 |
| Otu00871 | 14 | 0 | 0  | 0 | 0 | 0  | 0 | 0  | 0 | 7 | 3  | 4 | 0 | 0 | 0 | 0 |
| Otu00872 | 10 | 0 | 0  | 0 | 0 | 0  | 4 | 0  | 3 | 0 | 1  | 0 | 0 | 2 | 0 | 0 |
| Otu00873 | 15 | 0 | 0  | 0 | 0 | 0  | 9 | 0  | 1 | 1 | 3  | 1 | 0 | 0 | 0 | 0 |
| Otu00874 | 8  | 0 | 0  | 0 | 0 | 3  | 1 | 2  | 0 | 0 | 2  | 0 | 0 | 0 | 0 | 0 |
| Otu00875 | 7  | 0 | 0  | 0 | 0 | 0  | 0 | 0  | 1 | 0 | 0  | 6 | 0 | 0 | 0 | 0 |
| Otu00876 | 5  | 0 | 0  | 2 | 3 | 0  | 0 | 0  | 0 | 0 | 0  | 0 | 0 | 0 | 0 | 0 |
| Otu00877 | 7  | 0 | 0  | 0 | 0 | 3  | 0 | 0  | 1 | 1 | 2  | 0 | 0 | 0 | 0 | 0 |
| Otu00878 | 12 | 0 | 0  | 0 | 0 | 2  | 1 | 0  | 6 | 0 | 1  | 2 | 0 | 0 | 0 | 0 |

Supplementary 1  
 Taxonomy and Abundance of OTUs (see taxonomy of OTUs in Table S1A)  
 Normalized data, identification according to blast UNITEv7

|          |    |   |   |   |   |   |    |    |   |   |    |   |   |   |   |   |
|----------|----|---|---|---|---|---|----|----|---|---|----|---|---|---|---|---|
| Otu00879 | 12 | 0 | 0 | 0 | 0 | 0 | 0  | 3  | 4 | 4 | 1  | 0 | 0 | 0 | 0 | 0 |
| Otu00880 | 14 | 0 | 0 | 1 | 0 | 0 | 0  | 0  | 0 | 1 | 12 | 0 | 0 | 0 | 0 | 0 |
| Otu00882 | 15 | 0 | 0 | 0 | 0 | 0 | 1  | 1  | 5 | 3 | 5  | 0 | 0 | 0 | 0 | 0 |
| Otu00883 | 4  | 4 | 0 | 0 | 0 | 0 | 0  | 0  | 0 | 0 | 0  | 0 | 0 | 0 | 0 | 0 |
| Otu00884 | 3  | 3 | 0 | 0 | 0 | 0 | 0  | 0  | 0 | 0 | 0  | 0 | 0 | 0 | 0 | 0 |
| Otu00885 | 8  | 0 | 0 | 0 | 0 | 0 | 0  | 0  | 2 | 1 | 3  | 2 | 0 | 0 | 0 | 0 |
| Otu00886 | 6  | 3 | 0 | 0 | 0 | 3 | 0  | 0  | 0 | 0 | 0  | 0 | 0 | 0 | 0 | 0 |
| Otu00887 | 10 | 0 | 0 | 0 | 0 | 0 | 1  | 3  | 2 | 4 | 0  | 0 | 0 | 0 | 0 | 0 |
| Otu00888 | 2  | 0 | 0 | 0 | 0 | 2 | 0  | 0  | 0 | 0 | 0  | 0 | 0 | 0 | 0 | 0 |
| Otu00890 | 0  | 0 | 0 | 0 | 0 | 0 | 0  | 0  | 0 | 0 | 0  | 0 | 0 | 0 | 0 | 0 |
| Otu00891 | 3  | 0 | 0 | 0 | 0 | 3 | 0  | 0  | 0 | 0 | 0  | 0 | 0 | 0 | 0 | 0 |
| Otu00892 | 5  | 0 | 0 | 0 | 0 | 0 | 1  | 0  | 2 | 0 | 0  | 0 | 0 | 2 | 0 | 0 |
| Otu00893 | 2  | 0 | 0 | 0 | 0 | 0 | 1  | 1  | 0 | 0 | 0  | 0 | 0 | 0 | 0 | 0 |
| Otu00894 | 8  | 0 | 0 | 0 | 0 | 3 | 1  | 0  | 0 | 1 | 0  | 3 | 0 | 0 | 0 | 0 |
| Otu00895 | 10 | 0 | 0 | 0 | 0 | 5 | 0  | 1  | 4 | 0 | 0  | 0 | 0 | 0 | 0 | 0 |
| Otu00896 | 10 | 0 | 0 | 0 | 0 | 0 | 6  | 0  | 2 | 1 | 0  | 0 | 0 | 0 | 0 | 1 |
| Otu00897 | 6  | 0 | 0 | 0 | 0 | 0 | 1  | 1  | 1 | 0 | 0  | 2 | 0 | 1 | 0 | 0 |
| Otu00898 | 13 | 0 | 0 | 0 | 0 | 0 | 1  | 1  | 0 | 5 | 4  | 2 | 0 | 0 | 0 | 0 |
| Otu00899 | 11 | 0 | 0 | 0 | 0 | 0 | 0  | 0  | 6 | 0 | 4  | 1 | 0 | 0 | 0 | 0 |
| Otu00900 | 14 | 0 | 0 | 0 | 0 | 0 | 14 | 0  | 0 | 0 | 0  | 0 | 0 | 0 | 0 | 0 |
| Otu00901 | 6  | 0 | 0 | 0 | 3 | 2 | 0  | 1  | 0 | 0 | 0  | 0 | 0 | 0 | 0 | 0 |
| Otu00902 | 3  | 0 | 0 | 1 | 2 | 0 | 0  | 0  | 0 | 0 | 0  | 0 | 0 | 0 | 0 | 0 |
| Otu00903 | 9  | 0 | 0 | 0 | 0 | 1 | 5  | 0  | 0 | 0 | 2  | 1 | 0 | 0 | 0 | 0 |
| Otu00904 | 2  | 0 | 2 | 0 | 0 | 0 | 0  | 0  | 0 | 0 | 0  | 0 | 0 | 0 | 0 | 0 |
| Otu00905 | 9  | 0 | 0 | 0 | 9 | 0 | 0  | 0  | 0 | 0 | 0  | 0 | 0 | 0 | 0 | 0 |
| Otu00906 | 8  | 1 | 0 | 0 | 0 | 2 | 0  | 1  | 0 | 4 | 0  | 0 | 0 | 0 | 0 | 0 |
| Otu00907 | 6  | 3 | 1 | 1 | 1 | 0 | 0  | 0  | 0 | 0 | 0  | 0 | 0 | 0 | 0 | 0 |
| Otu00908 | 7  | 4 | 0 | 0 | 0 | 0 | 1  | 0  | 1 | 0 | 1  | 0 | 0 | 0 | 0 | 0 |
| Otu00909 | 4  | 0 | 3 | 0 | 1 | 0 | 0  | 0  | 0 | 0 | 0  | 0 | 0 | 0 | 0 | 0 |
| Otu00911 | 5  | 0 | 1 | 4 | 0 | 0 | 0  | 0  | 0 | 0 | 0  | 0 | 0 | 0 | 0 | 0 |
| Otu00912 | 0  | 0 | 0 | 0 | 0 | 0 | 0  | 0  | 0 | 0 | 0  | 0 | 0 | 0 | 0 | 0 |
| Otu00913 | 13 | 0 | 0 | 0 | 0 | 0 | 0  | 12 | 0 | 1 | 0  | 0 | 0 | 0 | 0 | 0 |
| Otu00914 | 5  | 0 | 0 | 0 | 4 | 0 | 0  | 0  | 0 | 1 | 0  | 0 | 0 | 0 | 0 | 0 |
| Otu00915 | 5  | 0 | 0 | 2 | 0 | 3 | 0  | 0  | 0 | 0 | 0  | 0 | 0 | 0 | 0 | 0 |
| Otu00916 | 12 | 0 | 0 | 0 | 0 | 0 | 5  | 0  | 5 | 0 | 0  | 2 | 0 | 0 | 0 | 0 |
| Otu00917 | 4  | 0 | 0 | 0 | 0 | 2 | 0  | 0  | 0 | 0 | 0  | 0 | 0 | 0 | 2 | 0 |
| Otu00918 | 13 | 0 | 0 | 0 | 0 | 1 | 8  | 0  | 4 | 0 | 0  | 0 | 0 | 0 | 0 | 0 |
| Otu00919 | 3  | 1 | 0 | 2 | 0 | 0 | 0  | 0  | 0 | 0 | 0  | 0 | 0 | 0 | 0 | 0 |
| Otu00920 | 4  | 0 | 0 | 4 | 0 | 0 | 0  | 0  | 0 | 0 | 0  | 0 | 0 | 0 | 0 | 0 |
| Otu00921 | 3  | 2 | 0 | 1 | 0 | 0 | 0  | 0  | 0 | 0 | 0  | 0 | 0 | 0 | 0 | 0 |
| Otu00923 | 13 | 0 | 0 | 0 | 0 | 0 | 0  | 8  | 0 | 5 | 0  | 0 | 0 | 0 | 0 | 0 |
| Otu00924 | 6  | 0 | 0 | 0 | 0 | 1 | 1  | 0  | 1 | 0 | 2  | 1 | 0 | 0 | 0 | 0 |
| Otu00925 | 10 | 0 | 0 | 0 | 0 | 1 | 1  | 1  | 1 | 0 | 5  | 1 | 0 | 0 | 0 | 0 |

Supplementary 1  
 Taxonomy and Abundance of OTUs (see taxonomy of OTUs in Table S1A)  
 Normalized data, identification according to blast UNITEv7

|          |    |   |   |   |   |   |   |   |   |   |    |   |   |   |   |   |
|----------|----|---|---|---|---|---|---|---|---|---|----|---|---|---|---|---|
| Otu00926 | 7  | 0 | 2 | 0 | 0 | 0 | 0 | 0 | 0 | 1 | 2  | 0 | 0 | 0 | 2 | 0 |
| Otu00927 | 7  | 0 | 0 | 0 | 0 | 0 | 2 | 3 | 0 | 1 | 0  | 1 | 0 | 0 | 0 | 0 |
| Otu00928 | 4  | 2 | 2 | 0 | 0 | 0 | 0 | 0 | 0 | 0 | 0  | 0 | 0 | 0 | 0 | 0 |
| Otu00929 | 4  | 0 | 3 | 0 | 0 | 0 | 1 | 0 | 0 | 0 | 0  | 0 | 0 | 0 | 0 | 0 |
| Otu00930 | 8  | 0 | 0 | 0 | 0 | 0 | 0 | 1 | 4 | 0 | 2  | 1 | 0 | 0 | 0 | 0 |
| Otu00931 | 5  | 0 | 0 | 0 | 0 | 1 | 1 | 1 | 0 | 2 | 0  | 0 | 0 | 0 | 0 | 0 |
| Otu00932 | 5  | 0 | 0 | 0 | 0 | 0 | 0 | 2 | 0 | 0 | 1  | 2 | 0 | 0 | 0 | 0 |
| Otu00933 | 4  | 0 | 0 | 4 | 0 | 0 | 0 | 0 | 0 | 0 | 0  | 0 | 0 | 0 | 0 | 0 |
| Otu00934 | 8  | 7 | 1 | 0 | 0 | 0 | 0 | 0 | 0 | 0 | 0  | 0 | 0 | 0 | 0 | 0 |
| Otu00935 | 9  | 0 | 0 | 0 | 0 | 4 | 4 | 0 | 0 | 1 | 0  | 0 | 0 | 0 | 0 | 0 |
| Otu00936 | 9  | 0 | 0 | 0 | 0 | 0 | 0 | 0 | 0 | 0 | 0  | 5 | 0 | 0 | 4 | 0 |
| Otu00937 | 11 | 0 | 0 | 0 | 0 | 1 | 0 | 1 | 3 | 1 | 3  | 2 | 0 | 0 | 0 | 0 |
| Otu00938 | 8  | 0 | 0 | 0 | 0 | 2 | 5 | 0 | 1 | 0 | 0  | 0 | 0 | 0 | 0 | 0 |
| Otu00939 | 5  | 0 | 0 | 0 | 0 | 0 | 1 | 1 | 0 | 0 | 0  | 0 | 0 | 1 | 2 | 0 |
| Otu00940 | 2  | 0 | 0 | 0 | 0 | 0 | 1 | 0 | 1 | 0 | 0  | 0 | 0 | 0 | 0 | 0 |
| Otu00941 | 13 | 0 | 0 | 0 | 0 | 0 | 1 | 0 | 0 | 0 | 11 | 0 | 0 | 1 | 0 | 0 |
| Otu00942 | 3  | 0 | 0 | 0 | 0 | 0 | 0 | 0 | 2 | 0 | 0  | 1 | 0 | 0 | 0 | 0 |
| Otu00943 | 10 | 0 | 0 | 0 | 0 | 1 | 1 | 0 | 1 | 2 | 4  | 1 | 0 | 0 | 0 | 0 |
| Otu00944 | 2  | 2 | 0 | 0 | 0 | 0 | 0 | 0 | 0 | 0 | 0  | 0 | 0 | 0 | 0 | 0 |
| Otu00946 | 9  | 0 | 0 | 0 | 0 | 0 | 0 | 2 | 3 | 3 | 0  | 0 | 0 | 0 | 1 | 0 |
| Otu00947 | 7  | 0 | 0 | 0 | 0 | 0 | 0 | 0 | 6 | 0 | 1  | 0 | 0 | 0 | 0 | 0 |
| Otu00948 | 7  | 0 | 0 | 0 | 0 | 0 | 0 | 0 | 0 | 0 | 0  | 0 | 5 | 0 | 2 | 0 |
| Otu00949 | 2  | 0 | 0 | 0 | 2 | 0 | 0 | 0 | 0 | 0 | 0  | 0 | 0 | 0 | 0 | 0 |
| Otu00950 | 8  | 0 | 0 | 5 | 1 | 2 | 0 | 0 | 0 | 0 | 0  | 0 | 0 | 0 | 0 | 0 |
| Otu00951 | 10 | 0 | 0 | 0 | 0 | 1 | 0 | 4 | 2 | 2 | 1  | 0 | 0 | 0 | 0 | 0 |
| Otu00952 | 12 | 0 | 0 | 0 | 0 | 0 | 0 | 0 | 0 | 0 | 12 | 0 | 0 | 0 | 0 | 0 |
| Otu00953 | 11 | 0 | 0 | 0 | 0 | 2 | 0 | 0 | 5 | 1 | 3  | 0 | 0 | 0 | 0 | 0 |
| Otu00955 | 0  | 0 | 0 | 0 | 0 | 0 | 0 | 0 | 0 | 0 | 0  | 0 | 0 | 0 | 0 | 0 |
| Otu00957 | 3  | 0 | 0 | 0 | 0 | 2 | 0 | 0 | 0 | 0 | 0  | 0 | 1 | 0 | 0 | 0 |
| Otu00959 | 10 | 0 | 0 | 0 | 0 | 0 | 0 | 0 | 1 | 0 | 4  | 3 | 0 | 1 | 1 | 0 |
| Otu00960 | 8  | 0 | 0 | 0 | 0 | 7 | 0 | 0 | 1 | 0 | 0  | 0 | 0 | 0 | 0 | 0 |
| Otu00961 | 4  | 0 | 0 | 0 | 0 | 0 | 0 | 0 | 2 | 2 | 0  | 0 | 0 | 0 | 0 | 0 |
| Otu00962 | 8  | 0 | 0 | 0 | 0 | 1 | 1 | 0 | 3 | 0 | 3  | 0 | 0 | 0 | 0 | 0 |
| Otu00963 | 9  | 0 | 0 | 0 | 0 | 0 | 1 | 5 | 1 | 1 | 0  | 1 | 0 | 0 | 0 | 0 |
| Otu00964 | 1  | 0 | 0 | 1 | 0 | 0 | 0 | 0 | 0 | 0 | 0  | 0 | 0 | 0 | 0 | 0 |
| Otu00965 | 5  | 0 | 0 | 0 | 0 | 1 | 1 | 1 | 0 | 2 | 0  | 0 | 0 | 0 | 0 | 0 |
| Otu00966 | 6  | 0 | 0 | 0 | 0 | 6 | 0 | 0 | 0 | 0 | 0  | 0 | 0 | 0 | 0 | 0 |
| Otu00967 | 6  | 0 | 0 | 0 | 0 | 3 | 1 | 1 | 1 | 0 | 0  | 0 | 0 | 0 | 0 | 0 |
| Otu00968 | 0  | 0 | 0 | 0 | 0 | 0 | 0 | 0 | 0 | 0 | 0  | 0 | 0 | 0 | 0 | 0 |
| Otu00969 | 6  | 4 | 0 | 0 | 0 | 0 | 0 | 0 | 2 | 0 | 0  | 0 | 0 | 0 | 0 | 0 |
| Otu00970 | 9  | 0 | 0 | 0 | 0 | 0 | 0 | 0 | 0 | 2 | 0  | 6 | 1 | 0 | 0 | 0 |
| Otu00971 | 6  | 0 | 0 | 6 | 0 | 0 | 0 | 0 | 0 | 0 | 0  | 0 | 0 | 0 | 0 | 0 |
| Otu00972 | 12 | 0 | 0 | 0 | 0 | 0 | 1 | 2 | 1 | 6 | 0  | 0 | 0 | 1 | 1 | 0 |

Supplementary 1  
 Taxonomy and Abundance of OTUs (see taxonomy of OTUs in Table S1A)  
 Normalized data, identification according to blast UNITEv7

|          |    |   |   |   |   |   |    |    |   |   |   |   |   |   |   |   |
|----------|----|---|---|---|---|---|----|----|---|---|---|---|---|---|---|---|
| Otu00973 | 7  | 0 | 0 | 0 | 0 | 0 | 2  | 0  | 0 | 1 | 1 | 1 | 0 | 1 | 1 | 0 |
| Otu00974 | 8  | 0 | 0 | 0 | 0 | 0 | 0  | 1  | 1 | 1 | 1 | 3 | 0 | 0 | 1 | 0 |
| Otu00975 | 6  | 0 | 0 | 4 | 2 | 0 | 0  | 0  | 0 | 0 | 0 | 0 | 0 | 0 | 0 | 0 |
| Otu00976 | 9  | 0 | 0 | 0 | 0 | 0 | 2  | 0  | 4 | 1 | 0 | 1 | 1 | 0 | 0 | 0 |
| Otu00977 | 6  | 0 | 0 | 0 | 0 | 2 | 0  | 0  | 3 | 0 | 0 | 1 | 0 | 0 | 0 | 0 |
| Otu00978 | 1  | 1 | 0 | 0 | 0 | 0 | 0  | 0  | 0 | 0 | 0 | 0 | 0 | 0 | 0 | 0 |
| Otu00979 | 5  | 2 | 0 | 3 | 0 | 0 | 0  | 0  | 0 | 0 | 0 | 0 | 0 | 0 | 0 | 0 |
| Otu00981 | 8  | 0 | 0 | 0 | 0 | 0 | 2  | 0  | 2 | 4 | 0 | 0 | 0 | 0 | 0 | 0 |
| Otu00982 | 1  | 0 | 0 | 0 | 0 | 1 | 0  | 0  | 0 | 0 | 0 | 0 | 0 | 0 | 0 | 0 |
| Otu00983 | 6  | 0 | 0 | 0 | 0 | 6 | 0  | 0  | 0 | 0 | 0 | 0 | 0 | 0 | 0 | 0 |
| Otu00984 | 12 | 0 | 0 | 0 | 1 | 0 | 10 | 1  | 0 | 0 | 0 | 0 | 0 | 0 | 0 | 0 |
| Otu00985 | 4  | 0 | 0 | 0 | 4 | 0 | 0  | 0  | 0 | 0 | 0 | 0 | 0 | 0 | 0 | 0 |
| Otu00986 | 7  | 0 | 0 | 0 | 0 | 0 | 5  | 0  | 0 | 1 | 1 | 0 | 0 | 0 | 0 | 0 |
| Otu00987 | 7  | 0 | 0 | 0 | 6 | 1 | 0  | 0  | 0 | 0 | 0 | 0 | 0 | 0 | 0 | 0 |
| Otu00988 | 4  | 0 | 0 | 0 | 0 | 0 | 0  | 2  | 0 | 0 | 0 | 1 | 0 | 0 | 1 | 0 |
| Otu00989 | 7  | 0 | 0 | 0 | 0 | 1 | 0  | 2  | 0 | 0 | 0 | 4 | 0 | 0 | 0 | 0 |
| Otu00990 | 5  | 0 | 0 | 0 | 4 | 0 | 0  | 0  | 1 | 0 | 0 | 0 | 0 | 0 | 0 | 0 |
| Otu00991 | 9  | 0 | 0 | 0 | 0 | 3 | 3  | 0  | 1 | 1 | 1 | 0 | 0 | 0 | 0 | 0 |
| Otu00992 | 7  | 0 | 7 | 0 | 0 | 0 | 0  | 0  | 0 | 0 | 0 | 0 | 0 | 0 | 0 | 0 |
| Otu00993 | 1  | 0 | 0 | 0 | 1 | 0 | 0  | 0  | 0 | 0 | 0 | 0 | 0 | 0 | 0 | 0 |
| Otu00994 | 8  | 0 | 0 | 0 | 0 | 0 | 1  | 3  | 3 | 0 | 0 | 0 | 0 | 1 | 0 | 0 |
| Otu00995 | 8  | 0 | 0 | 0 | 0 | 4 | 2  | 1  | 0 | 0 | 0 | 1 | 0 | 0 | 0 | 0 |
| Otu00996 | 7  | 0 | 0 | 0 | 0 | 0 | 0  | 1  | 0 | 1 | 1 | 4 | 0 | 0 | 0 | 0 |
| Otu00997 | 5  | 0 | 0 | 0 | 0 | 1 | 0  | 1  | 1 | 1 | 0 | 0 | 0 | 0 | 0 | 1 |
| Otu00998 | 6  | 0 | 0 | 6 | 0 | 0 | 0  | 0  | 0 | 0 | 0 | 0 | 0 | 0 | 0 | 0 |
| Otu00999 | 5  | 0 | 0 | 0 | 1 | 3 | 0  | 0  | 0 | 0 | 1 | 0 | 0 | 0 | 0 | 0 |
| Otu01000 | 1  | 1 | 0 | 0 | 0 | 0 | 0  | 0  | 0 | 0 | 0 | 0 | 0 | 0 | 0 | 0 |
| Otu01001 | 4  | 3 | 1 | 0 | 0 | 0 | 0  | 0  | 0 | 0 | 0 | 0 | 0 | 0 | 0 | 0 |
| Otu01002 | 4  | 0 | 0 | 0 | 2 | 0 | 0  | 1  | 0 | 1 | 0 | 0 | 0 | 0 | 0 | 0 |
| Otu01003 | 6  | 0 | 1 | 0 | 0 | 2 | 0  | 0  | 0 | 0 | 0 | 0 | 0 | 1 | 2 | 0 |
| Otu01004 | 10 | 0 | 0 | 0 | 0 | 0 | 0  | 10 | 0 | 0 | 0 | 0 | 0 | 0 | 0 | 0 |
| Otu01005 | 8  | 0 | 0 | 0 | 0 | 2 | 4  | 1  | 1 | 0 | 0 | 0 | 0 | 0 | 0 | 0 |
| Otu01006 | 7  | 0 | 0 | 0 | 0 | 1 | 3  | 0  | 0 | 0 | 0 | 1 | 0 | 0 | 0 | 2 |
| Otu01007 | 8  | 0 | 0 | 0 | 0 | 0 | 5  | 0  | 1 | 0 | 0 | 0 | 1 | 1 | 0 | 0 |
| Otu01008 | 5  | 0 | 0 | 0 | 0 | 0 | 0  | 0  | 0 | 0 | 0 | 0 | 0 | 0 | 5 | 0 |
| Otu01009 | 7  | 0 | 0 | 0 | 0 | 0 | 2  | 0  | 3 | 0 | 1 | 1 | 0 | 0 | 0 | 0 |
| Otu01010 | 6  | 0 | 0 | 0 | 0 | 1 | 0  | 0  | 1 | 0 | 2 | 2 | 0 | 0 | 0 | 0 |
| Otu01011 | 8  | 0 | 0 | 0 | 0 | 0 | 0  | 0  | 2 | 3 | 1 | 2 | 0 | 0 | 0 | 0 |
| Otu01012 | 3  | 0 | 0 | 0 | 0 | 0 | 3  | 0  | 0 | 0 | 0 | 0 | 0 | 0 | 0 | 0 |
| Otu01013 | 2  | 0 | 0 | 0 | 0 | 0 | 0  | 0  | 0 | 0 | 0 | 2 | 0 | 0 | 0 | 0 |
| Otu01014 | 5  | 0 | 0 | 0 | 0 | 2 | 0  | 0  | 0 | 2 | 0 | 1 | 0 | 0 | 0 | 0 |
| Otu01015 | 6  | 0 | 1 | 0 | 2 | 0 | 0  | 0  | 2 | 0 | 0 | 0 | 0 | 0 | 1 | 0 |
| Otu01016 | 5  | 0 | 0 | 0 | 0 | 2 | 2  | 0  | 0 | 0 | 0 | 1 | 0 | 0 | 0 | 0 |

Supplementary 1  
 Taxonomy and Abundance of OTUs (see taxonomy of OTUs in Table S1A)  
 Normalized data, identification according to blast UNITEv7

|          |    |   |   |   |   |   |    |   |   |   |   |   |   |   |   |   |   |
|----------|----|---|---|---|---|---|----|---|---|---|---|---|---|---|---|---|---|
| Otu01017 | 3  | 0 | 0 | 0 | 3 | 0 | 0  | 0 | 0 | 0 | 0 | 0 | 0 | 0 | 0 | 0 | 0 |
| Otu01018 | 6  | 0 | 0 | 0 | 0 | 2 | 0  | 0 | 1 | 0 | 2 | 0 | 0 | 0 | 0 | 1 | 0 |
| Otu01019 | 3  | 1 | 0 | 2 | 0 | 0 | 0  | 0 | 0 | 0 | 0 | 0 | 0 | 0 | 0 | 0 | 0 |
| Otu01020 | 6  | 0 | 6 | 0 | 0 | 0 | 0  | 0 | 0 | 0 | 0 | 0 | 0 | 0 | 0 | 0 | 0 |
| Otu01021 | 8  | 0 | 0 | 0 | 0 | 0 | 3  | 0 | 3 | 0 | 1 | 1 | 0 | 0 | 0 | 0 | 0 |
| Otu01022 | 1  | 0 | 0 | 0 | 1 | 0 | 0  | 0 | 0 | 0 | 0 | 0 | 0 | 0 | 0 | 0 | 0 |
| Otu01023 | 1  | 0 | 0 | 1 | 0 | 0 | 0  | 0 | 0 | 0 | 0 | 0 | 0 | 0 | 0 | 0 | 0 |
| Otu01024 | 4  | 0 | 0 | 1 | 3 | 0 | 0  | 0 | 0 | 0 | 0 | 0 | 0 | 0 | 0 | 0 | 0 |
| Otu01025 | 7  | 0 | 2 | 0 | 1 | 0 | 0  | 0 | 0 | 0 | 0 | 2 | 1 | 1 | 0 | 0 | 0 |
| Otu01026 | 11 | 0 | 0 | 0 | 0 | 0 | 11 | 0 | 0 | 0 | 0 | 0 | 0 | 0 | 0 | 0 | 0 |
| Otu01027 | 6  | 0 | 0 | 0 | 0 | 0 | 1  | 0 | 1 | 0 | 0 | 0 | 0 | 1 | 3 | 0 | 0 |
| Otu01028 | 10 | 0 | 0 | 0 | 0 | 5 | 1  | 3 | 0 | 0 | 1 | 0 | 0 | 0 | 0 | 0 | 0 |
| Otu01029 | 11 | 0 | 0 | 0 | 0 | 0 | 0  | 8 | 2 | 1 | 0 | 0 | 0 | 0 | 0 | 0 | 0 |
| Otu01030 | 2  | 0 | 0 | 0 | 2 | 0 | 0  | 0 | 0 | 0 | 0 | 0 | 0 | 0 | 0 | 0 | 0 |
| Otu01031 | 3  | 0 | 0 | 1 | 1 | 0 | 1  | 0 | 0 | 0 | 0 | 0 | 0 | 0 | 0 | 0 | 0 |
| Otu01033 | 7  | 0 | 0 | 0 | 0 | 0 | 0  | 0 | 0 | 5 | 0 | 1 | 0 | 0 | 1 | 0 | 0 |
| Otu01034 | 2  | 0 | 0 | 0 | 0 | 0 | 0  | 0 | 0 | 0 | 2 | 0 | 0 | 0 | 0 | 0 | 0 |
| Otu01035 | 9  | 0 | 0 | 9 | 0 | 0 | 0  | 0 | 0 | 0 | 0 | 0 | 0 | 0 | 0 | 0 | 0 |
| Otu01036 | 2  | 0 | 0 | 0 | 0 | 2 | 0  | 0 | 0 | 0 | 0 | 0 | 0 | 0 | 0 | 0 | 0 |
| Otu01037 | 10 | 0 | 0 | 0 | 0 | 1 | 0  | 9 | 0 | 0 | 0 | 0 | 0 | 0 | 0 | 0 | 0 |
| Otu01038 | 7  | 0 | 0 | 0 | 0 | 0 | 1  | 0 | 0 | 2 | 4 | 0 | 0 | 0 | 0 | 0 | 0 |
| Otu01039 | 2  | 0 | 0 | 0 | 2 | 0 | 0  | 0 | 0 | 0 | 0 | 0 | 0 | 0 | 0 | 0 | 0 |
| Otu01040 | 6  | 0 | 0 | 0 | 0 | 0 | 0  | 1 | 1 | 2 | 0 | 2 | 0 | 0 | 0 | 0 | 0 |
| Otu01041 | 6  | 0 | 0 | 0 | 0 | 1 | 3  | 0 | 1 | 0 | 0 | 1 | 0 | 0 | 0 | 0 | 0 |
| Otu01042 | 4  | 0 | 0 | 0 | 4 | 0 | 0  | 0 | 0 | 0 | 0 | 0 | 0 | 0 | 0 | 0 | 0 |
| Otu01043 | 5  | 0 | 0 | 0 | 0 | 0 | 0  | 0 | 0 | 0 | 0 | 0 | 0 | 0 | 0 | 5 | 0 |
| Otu01044 | 4  | 0 | 4 | 0 | 0 | 0 | 0  | 0 | 0 | 0 | 0 | 0 | 0 | 0 | 0 | 0 | 0 |
| Otu01045 | 7  | 0 | 0 | 0 | 0 | 0 | 2  | 0 | 0 | 3 | 1 | 0 | 1 | 0 | 0 | 0 | 0 |
| Otu01046 | 8  | 0 | 0 | 0 | 0 | 0 | 0  | 4 | 2 | 0 | 2 | 0 | 0 | 0 | 0 | 0 | 0 |
| Otu01047 | 4  | 2 | 0 | 1 | 0 | 0 | 0  | 1 | 0 | 0 | 0 | 0 | 0 | 0 | 0 | 0 | 0 |
| Otu01048 | 5  | 0 | 2 | 0 | 0 | 0 | 2  | 0 | 0 | 0 | 0 | 1 | 0 | 0 | 0 | 0 | 0 |
| Otu01049 | 5  | 0 | 0 | 0 | 0 | 0 | 0  | 1 | 4 | 0 | 0 | 0 | 0 | 0 | 0 | 0 | 0 |
| Otu01051 | 5  | 0 | 0 | 0 | 0 | 2 | 1  | 1 | 0 | 1 | 0 | 0 | 0 | 0 | 0 | 0 | 0 |
| Otu01052 | 0  | 0 | 0 | 0 | 0 | 0 | 0  | 0 | 0 | 0 | 0 | 0 | 0 | 0 | 0 | 0 | 0 |
| Otu01053 | 6  | 0 | 0 | 0 | 0 | 0 | 0  | 3 | 0 | 1 | 1 | 1 | 0 | 0 | 0 | 0 | 0 |
| Otu01054 | 1  | 0 | 0 | 1 | 0 | 0 | 0  | 0 | 0 | 0 | 0 | 0 | 0 | 0 | 0 | 0 | 0 |
| Otu01056 | 3  | 0 | 0 | 0 | 0 | 0 | 1  | 0 | 0 | 1 | 0 | 0 | 1 | 0 | 0 | 0 | 0 |
| Otu01057 | 7  | 0 | 0 | 0 | 0 | 3 | 0  | 1 | 3 | 0 | 0 | 0 | 0 | 0 | 0 | 0 | 0 |
| Otu01058 | 6  | 0 | 0 | 0 | 0 | 0 | 2  | 0 | 0 | 1 | 1 | 0 | 2 | 0 | 0 | 0 | 0 |
| Otu01059 | 4  | 0 | 3 | 0 | 0 | 1 | 0  | 0 | 0 | 0 | 0 | 0 | 0 | 0 | 0 | 0 | 0 |
| Otu01060 | 4  | 0 | 0 | 0 | 0 | 2 | 1  | 0 | 0 | 1 | 0 | 0 | 0 | 0 | 0 | 0 | 0 |
| Otu01061 | 6  | 0 | 0 | 0 | 0 | 2 | 0  | 2 | 1 | 0 | 1 | 0 | 0 | 0 | 0 | 0 | 0 |
| Otu01062 | 7  | 0 | 0 | 0 | 0 | 0 | 1  | 0 | 2 | 0 | 0 | 3 | 0 | 0 | 0 | 0 | 1 |



Supplementary 1  
 Taxonomy and Abundance of OTUs (see taxonomy of OTUs in Table S1A)  
 Normalized data, identification according to blast UNITEv7

|          |    |   |   |   |   |   |   |   |   |   |   |   |   |   |   |   |   |
|----------|----|---|---|---|---|---|---|---|---|---|---|---|---|---|---|---|---|
| Otu01063 | 3  | 0 | 0 | 0 | 0 | 0 | 0 | 0 | 0 | 0 | 0 | 0 | 0 | 0 | 0 | 3 | 0 |
| Otu01064 | 10 | 0 | 0 | 0 | 0 | 0 | 1 | 2 | 0 | 3 | 3 | 0 | 1 | 0 | 0 | 0 | 0 |
| Otu01065 | 8  | 0 | 0 | 1 | 1 | 2 | 1 | 1 | 0 | 1 | 0 | 1 | 0 | 0 | 0 | 0 | 0 |
| Otu01066 | 6  | 0 | 6 | 0 | 0 | 0 | 0 | 0 | 0 | 0 | 0 | 0 | 0 | 0 | 0 | 0 | 0 |
| Otu01067 | 1  | 0 | 0 | 0 | 0 | 0 | 1 | 0 | 0 | 0 | 0 | 0 | 0 | 0 | 0 | 0 | 0 |
| Otu01069 | 3  | 0 | 0 | 0 | 0 | 0 | 0 | 0 | 0 | 0 | 0 | 0 | 0 | 0 | 0 | 3 | 0 |
| Otu01070 | 10 | 0 | 0 | 0 | 0 | 0 | 1 | 0 | 3 | 5 | 1 | 0 | 0 | 0 | 0 | 0 | 0 |
| Otu01071 | 2  | 0 | 2 | 0 | 0 | 0 | 0 | 0 | 0 | 0 | 0 | 0 | 0 | 0 | 0 | 0 | 0 |
| Otu01072 | 6  | 0 | 0 | 0 | 0 | 0 | 1 | 0 | 5 | 0 | 0 | 0 | 0 | 0 | 0 | 0 | 0 |
| Otu01074 | 2  | 0 | 0 | 0 | 0 | 0 | 0 | 2 | 0 | 0 | 0 | 0 | 0 | 0 | 0 | 0 | 0 |
| Otu01075 | 1  | 0 | 0 | 1 | 0 | 0 | 0 | 0 | 0 | 0 | 0 | 0 | 0 | 0 | 0 | 0 | 0 |
| Otu01076 | 6  | 0 | 0 | 0 | 0 | 1 | 0 | 0 | 2 | 0 | 0 | 0 | 0 | 1 | 2 | 0 | 0 |
| Otu01077 | 7  | 0 | 0 | 0 | 0 | 0 | 3 | 0 | 2 | 0 | 0 | 0 | 0 | 1 | 1 | 0 | 0 |
| Otu01078 | 8  | 0 | 0 | 0 | 0 | 0 | 0 | 1 | 3 | 1 | 0 | 3 | 0 | 0 | 0 | 0 | 0 |
| Otu01079 | 4  | 0 | 0 | 0 | 0 | 0 | 0 | 0 | 0 | 0 | 0 | 0 | 0 | 2 | 2 | 0 | 0 |
| Otu01080 | 6  | 0 | 0 | 0 | 0 | 0 | 0 | 1 | 0 | 0 | 1 | 4 | 0 | 0 | 0 | 0 | 0 |
| Otu01081 | 9  | 0 | 0 | 0 | 0 | 0 | 7 | 0 | 0 | 1 | 1 | 0 | 0 | 0 | 0 | 0 | 0 |
| Otu01082 | 4  | 0 | 0 | 0 | 0 | 0 | 2 | 0 | 1 | 0 | 0 | 0 | 0 | 1 | 0 | 0 | 0 |
| Otu01083 | 3  | 0 | 3 | 0 | 0 | 0 | 0 | 0 | 0 | 0 | 0 | 0 | 0 | 0 | 0 | 0 | 0 |
| Otu01084 | 1  | 0 | 0 | 0 | 1 | 0 | 0 | 0 | 0 | 0 | 0 | 0 | 0 | 0 | 0 | 0 | 0 |
| Otu01085 | 3  | 0 | 0 | 0 | 3 | 0 | 0 | 0 | 0 | 0 | 0 | 0 | 0 | 0 | 0 | 0 | 0 |
| Otu01086 | 8  | 0 | 0 | 0 | 0 | 0 | 1 | 0 | 1 | 0 | 0 | 0 | 0 | 0 | 0 | 6 | 0 |
| Otu01087 | 6  | 6 | 0 | 0 | 0 | 0 | 0 | 0 | 0 | 0 | 0 | 0 | 0 | 0 | 0 | 0 | 0 |
| Otu01088 | 8  | 0 | 0 | 0 | 0 | 1 | 5 | 2 | 0 | 0 | 0 | 0 | 0 | 0 | 0 | 0 | 0 |
| Otu01089 | 7  | 0 | 0 | 0 | 0 | 0 | 3 | 0 | 1 | 1 | 0 | 2 | 0 | 0 | 0 | 0 | 0 |
| Otu01090 | 7  | 0 | 0 | 0 | 0 | 0 | 2 | 2 | 0 | 0 | 0 | 2 | 0 | 0 | 1 | 0 | 0 |
| Otu01092 | 9  | 0 | 0 | 0 | 0 | 0 | 0 | 0 | 9 | 0 | 0 | 0 | 0 | 0 | 0 | 0 | 0 |
| Otu01093 | 6  | 0 | 0 | 0 | 0 | 1 | 2 | 0 | 3 | 0 | 0 | 0 | 0 | 0 | 0 | 0 | 0 |
| Otu01094 | 3  | 0 | 3 | 0 | 0 | 0 | 0 | 0 | 0 | 0 | 0 | 0 | 0 | 0 | 0 | 0 | 0 |
| Otu01095 | 6  | 6 | 0 | 0 | 0 | 0 | 0 | 0 | 0 | 0 | 0 | 0 | 0 | 0 | 0 | 0 | 0 |
| Otu01096 | 5  | 0 | 0 | 0 | 0 | 3 | 0 | 0 | 0 | 1 | 1 | 0 | 0 | 0 | 0 | 0 | 0 |
| Otu01097 | 5  | 0 | 0 | 0 | 0 | 0 | 0 | 0 | 0 | 0 | 0 | 0 | 0 | 0 | 0 | 5 | 0 |
| Otu01098 | 3  | 0 | 0 | 0 | 0 | 0 | 0 | 0 | 0 | 0 | 0 | 0 | 1 | 1 | 1 | 0 | 0 |
| Otu01099 | 4  | 0 | 0 | 0 | 4 | 0 | 0 | 0 | 0 | 0 | 0 | 0 | 0 | 0 | 0 | 0 | 0 |
| Otu01100 | 4  | 3 | 1 | 0 | 0 | 0 | 0 | 0 | 0 | 0 | 0 | 0 | 0 | 0 | 0 | 0 | 0 |
| Otu01101 | 0  | 0 | 0 | 0 | 0 | 0 | 0 | 0 | 0 | 0 | 0 | 0 | 0 | 0 | 0 | 0 | 0 |
| Otu01102 | 9  | 0 | 0 | 0 | 0 | 1 | 4 | 0 | 0 | 0 | 1 | 3 | 0 | 0 | 0 | 0 | 0 |
| Otu01103 | 6  | 0 | 0 | 0 | 0 | 1 | 0 | 0 | 2 | 2 | 1 | 0 | 0 | 0 | 0 | 0 | 0 |
| Otu01104 | 9  | 0 | 0 | 0 | 0 | 0 | 0 | 0 | 9 | 0 | 0 | 0 | 0 | 0 | 0 | 0 | 0 |
| Otu01105 | 2  | 0 | 0 | 0 | 0 | 0 | 0 | 0 | 0 | 0 | 0 | 2 | 0 | 0 | 0 | 0 | 0 |
| Otu01108 | 1  | 0 | 0 | 0 | 0 | 1 | 0 | 0 | 0 | 0 | 0 | 0 | 0 | 0 | 0 | 0 | 0 |
| Otu01109 | 3  | 0 | 0 | 0 | 0 | 1 | 0 | 0 | 1 | 0 | 1 | 0 | 0 | 0 | 0 | 0 | 0 |
| Otu01110 | 8  | 0 | 0 | 0 | 0 | 3 | 0 | 1 | 3 | 0 | 1 | 0 | 0 | 0 | 0 | 0 | 0 |

Supplementary 1  
 Taxonomy and Abundance of OTUs (see taxonomy of OTUs in Table S1A)  
 Normalized data, identification according to blast UNITEv7

|          |   |   |   |   |   |   |   |   |   |   |   |   |   |   |   |   |
|----------|---|---|---|---|---|---|---|---|---|---|---|---|---|---|---|---|
| Otu01111 | 4 | 0 | 0 | 0 | 0 | 0 | 1 | 0 | 1 | 0 | 1 | 1 | 0 | 0 | 0 | 0 |
| Otu01112 | 8 | 0 | 0 | 0 | 0 | 0 | 0 | 0 | 6 | 0 | 1 | 0 | 0 | 1 | 0 | 0 |
| Otu01113 | 9 | 0 | 0 | 0 | 0 | 0 | 0 | 1 | 2 | 2 | 4 | 0 | 0 | 0 | 0 | 0 |
| Otu01114 | 3 | 0 | 0 | 0 | 0 | 0 | 0 | 0 | 3 | 0 | 0 | 0 | 0 | 0 | 0 | 0 |
| Otu01115 | 6 | 0 | 0 | 5 | 1 | 0 | 0 | 0 | 0 | 0 | 0 | 0 | 0 | 0 | 0 | 0 |
| Otu01116 | 5 | 0 | 0 | 0 | 0 | 2 | 1 | 0 | 0 | 0 | 1 | 0 | 0 | 1 | 0 | 0 |
| Otu01117 | 4 | 0 | 0 | 0 | 0 | 2 | 0 | 0 | 0 | 0 | 1 | 1 | 0 | 0 | 0 | 0 |
| Otu01119 | 2 | 0 | 0 | 0 | 0 | 1 | 0 | 0 | 1 | 0 | 0 | 0 | 0 | 0 | 0 | 0 |
| Otu01120 | 4 | 0 | 0 | 3 | 0 | 1 | 0 | 0 | 0 | 0 | 0 | 0 | 0 | 0 | 0 | 0 |
| Otu01122 | 8 | 0 | 0 | 0 | 0 | 0 | 0 | 0 | 1 | 0 | 5 | 2 | 0 | 0 | 0 | 0 |
| Otu01123 | 8 | 0 | 2 | 6 | 0 | 0 | 0 | 0 | 0 | 0 | 0 | 0 | 0 | 0 | 0 | 0 |
| Otu01124 | 5 | 0 | 0 | 0 | 0 | 1 | 0 | 1 | 1 | 1 | 1 | 0 | 0 | 0 | 0 | 0 |
| Otu01125 | 1 | 0 | 0 | 0 | 0 | 0 | 0 | 0 | 1 | 0 | 0 | 0 | 0 | 0 | 0 | 0 |
| Otu01126 | 7 | 0 | 0 | 0 | 0 | 2 | 2 | 0 | 2 | 0 | 1 | 0 | 0 | 0 | 0 | 0 |
| Otu01127 | 6 | 0 | 0 | 6 | 0 | 0 | 0 | 0 | 0 | 0 | 0 | 0 | 0 | 0 | 0 | 0 |
| Otu01128 | 4 | 0 | 0 | 0 | 0 | 1 | 3 | 0 | 0 | 0 | 0 | 0 | 0 | 0 | 0 | 0 |
| Otu01129 | 5 | 0 | 0 | 0 | 0 | 0 | 0 | 0 | 0 | 0 | 0 | 0 | 0 | 0 | 5 | 0 |
| Otu01130 | 8 | 0 | 0 | 0 | 0 | 0 | 0 | 5 | 0 | 2 | 0 | 0 | 0 | 1 | 0 | 0 |
| Otu01131 | 2 | 0 | 0 | 0 | 0 | 0 | 0 | 2 | 0 | 0 | 0 | 0 | 0 | 0 | 0 | 0 |
| Otu01132 | 8 | 0 | 0 | 0 | 0 | 0 | 2 | 0 | 2 | 2 | 2 | 0 | 0 | 0 | 0 | 0 |
| Otu01133 | 8 | 0 | 0 | 0 | 0 | 0 | 2 | 2 | 0 | 1 | 3 | 0 | 0 | 0 | 0 | 0 |
| Otu01134 | 7 | 0 | 0 | 0 | 0 | 0 | 0 | 1 | 1 | 2 | 3 | 0 | 0 | 0 | 0 | 0 |
| Otu01135 | 5 | 0 | 0 | 0 | 0 | 0 | 0 | 0 | 1 | 2 | 2 | 0 | 0 | 0 | 0 | 0 |
| Otu01136 | 9 | 0 | 0 | 0 | 0 | 0 | 1 | 2 | 0 | 0 | 6 | 0 | 0 | 0 | 0 | 0 |
| Otu01137 | 9 | 0 | 0 | 0 | 0 | 4 | 2 | 0 | 1 | 0 | 2 | 0 | 0 | 0 | 0 | 0 |
| Otu01138 | 1 | 0 | 0 | 1 | 0 | 0 | 0 | 0 | 0 | 0 | 0 | 0 | 0 | 0 | 0 | 0 |
| Otu01139 | 4 | 0 | 0 | 0 | 0 | 1 | 0 | 0 | 2 | 0 | 0 | 1 | 0 | 0 | 0 | 0 |
| Otu01140 | 7 | 0 | 0 | 0 | 0 | 0 | 2 | 1 | 0 | 1 | 3 | 0 | 0 | 0 | 0 | 0 |
| Otu01141 | 8 | 0 | 0 | 0 | 0 | 0 | 3 | 0 | 1 | 3 | 0 | 0 | 1 | 0 | 0 | 0 |
| Otu01142 | 1 | 0 | 0 | 0 | 0 | 0 | 0 | 0 | 0 | 0 | 0 | 1 | 0 | 0 | 0 | 0 |
| Otu01143 | 3 | 1 | 0 | 0 | 0 | 2 | 0 | 0 | 0 | 0 | 0 | 0 | 0 | 0 | 0 | 0 |
| Otu01144 | 8 | 0 | 0 | 0 | 0 | 0 | 1 | 2 | 0 | 0 | 2 | 2 | 0 | 0 | 1 | 0 |
| Otu01145 | 1 | 0 | 0 | 1 | 0 | 0 | 0 | 0 | 0 | 0 | 0 | 0 | 0 | 0 | 0 | 0 |
| Otu01146 | 5 | 0 | 0 | 0 | 0 | 0 | 0 | 1 | 2 | 0 | 0 | 2 | 0 | 0 | 0 | 0 |
| Otu01147 | 5 | 1 | 0 | 2 | 2 | 0 | 0 | 0 | 0 | 0 | 0 | 0 | 0 | 0 | 0 | 0 |
| Otu01148 | 4 | 0 | 0 | 0 | 0 | 0 | 0 | 0 | 0 | 0 | 0 | 0 | 0 | 0 | 4 | 0 |
| Otu01149 | 4 | 0 | 0 | 0 | 0 | 1 | 2 | 0 | 1 | 0 | 0 | 0 | 0 | 0 | 0 | 0 |
| Otu01150 | 1 | 1 | 0 | 0 | 0 | 0 | 0 | 0 | 0 | 0 | 0 | 0 | 0 | 0 | 0 | 0 |
| Otu01151 | 7 | 0 | 0 | 0 | 0 | 0 | 0 | 1 | 0 | 0 | 3 | 3 | 0 | 0 | 0 | 0 |
| Otu01152 | 4 | 0 | 0 | 0 | 0 | 0 | 0 | 1 | 0 | 3 | 0 | 0 | 0 | 0 | 0 | 0 |
| Otu01153 | 4 | 0 | 0 | 0 | 0 | 1 | 0 | 0 | 0 | 3 | 0 | 0 | 0 | 0 | 0 | 0 |
| Otu01156 | 5 | 0 | 0 | 0 | 0 | 0 | 0 | 0 | 1 | 3 | 1 | 0 | 0 | 0 | 0 | 0 |
| Otu01157 | 4 | 0 | 0 | 1 | 0 | 1 | 1 | 0 | 0 | 0 | 1 | 0 | 0 | 0 | 0 | 0 |

Supplementary 1  
 Taxonomy and Abundance of OTUs (see taxonomy of OTUs in Table S1A)  
 Normalized data, identification according to blast UNITEv7

|          |   |   |   |   |   |   |   |   |   |   |   |   |   |   |   |   |
|----------|---|---|---|---|---|---|---|---|---|---|---|---|---|---|---|---|
| Otu01158 | 5 | 0 | 0 | 0 | 0 | 0 | 0 | 2 | 1 | 2 | 0 | 0 | 0 | 0 | 0 | 0 |
| Otu01159 | 6 | 0 | 0 | 0 | 0 | 0 | 0 | 1 | 1 | 3 | 0 | 1 | 0 | 0 | 0 | 0 |
| Otu01160 | 7 | 0 | 0 | 0 | 0 | 0 | 1 | 0 | 2 | 1 | 3 | 0 | 0 | 0 | 0 | 0 |
| Otu01161 | 5 | 0 | 0 | 0 | 0 | 1 | 1 | 0 | 0 | 0 | 0 | 0 | 0 | 0 | 0 | 3 |
| Otu01162 | 8 | 0 | 0 | 0 | 0 | 0 | 8 | 0 | 0 | 0 | 0 | 0 | 0 | 0 | 0 | 0 |
| Otu01163 | 2 | 0 | 0 | 2 | 0 | 0 | 0 | 0 | 0 | 0 | 0 | 0 | 0 | 0 | 0 | 0 |
| Otu01164 | 7 | 0 | 0 | 0 | 0 | 0 | 0 | 0 | 0 | 0 | 3 | 0 | 0 | 0 | 0 | 4 |
| Otu01165 | 5 | 0 | 0 | 0 | 0 | 0 | 0 | 0 | 0 | 1 | 1 | 2 | 0 | 0 | 0 | 1 |
| Otu01166 | 0 | 0 | 0 | 0 | 0 | 0 | 0 | 0 | 0 | 0 | 0 | 0 | 0 | 0 | 0 | 0 |
| Otu01167 | 6 | 0 | 0 | 0 | 0 | 3 | 1 | 0 | 0 | 1 | 1 | 0 | 0 | 0 | 0 | 0 |
| Otu01168 | 2 | 0 | 0 | 0 | 0 | 0 | 0 | 1 | 0 | 0 | 0 | 1 | 0 | 0 | 0 | 0 |
| Otu01169 | 5 | 0 | 0 | 0 | 0 | 0 | 0 | 4 | 1 | 0 | 0 | 0 | 0 | 0 | 0 | 0 |
| Otu01170 | 2 | 0 | 0 | 2 | 0 | 0 | 0 | 0 | 0 | 0 | 0 | 0 | 0 | 0 | 0 | 0 |
| Otu01171 | 4 | 0 | 0 | 0 | 0 | 0 | 0 | 1 | 0 | 2 | 0 | 0 | 0 | 0 | 1 | 0 |
| Otu01172 | 5 | 0 | 0 | 0 | 1 | 2 | 1 | 0 | 0 | 1 | 0 | 0 | 0 | 0 | 0 | 0 |
| Otu01173 | 7 | 1 | 0 | 6 | 0 | 0 | 0 | 0 | 0 | 0 | 0 | 0 | 0 | 0 | 0 | 0 |
| Otu01175 | 5 | 0 | 0 | 0 | 0 | 0 | 3 | 0 | 0 | 0 | 0 | 1 | 0 | 0 | 0 | 1 |
| Otu01176 | 8 | 0 | 0 | 0 | 0 | 0 | 0 | 0 | 2 | 0 | 6 | 0 | 0 | 0 | 0 | 0 |
| Otu01177 | 5 | 0 | 0 | 5 | 0 | 0 | 0 | 0 | 0 | 0 | 0 | 0 | 0 | 0 | 0 | 0 |
| Otu01178 | 3 | 0 | 3 | 0 | 0 | 0 | 0 | 0 | 0 | 0 | 0 | 0 | 0 | 0 | 0 | 0 |
| Otu01179 | 6 | 0 | 0 | 0 | 0 | 2 | 1 | 0 | 0 | 0 | 0 | 3 | 0 | 0 | 0 | 0 |
| Otu01180 | 7 | 0 | 0 | 6 | 0 | 0 | 0 | 0 | 0 | 0 | 1 | 0 | 0 | 0 | 0 | 0 |
| Otu01181 | 2 | 1 | 0 | 0 | 0 | 0 | 0 | 0 | 0 | 0 | 0 | 1 | 0 | 0 | 0 | 0 |
| Otu01182 | 4 | 0 | 0 | 0 | 0 | 0 | 0 | 0 | 0 | 2 | 1 | 0 | 0 | 0 | 0 | 1 |
| Otu01183 | 8 | 0 | 0 | 0 | 0 | 0 | 1 | 3 | 1 | 2 | 0 | 0 | 1 | 0 | 0 | 0 |
| Otu01184 | 4 | 0 | 0 | 0 | 0 | 0 | 0 | 0 | 0 | 0 | 0 | 2 | 0 | 2 | 0 | 0 |
| Otu01185 | 6 | 0 | 0 | 0 | 0 | 0 | 0 | 2 | 1 | 2 | 1 | 0 | 0 | 0 | 0 | 0 |
| Otu01186 | 7 | 0 | 0 | 0 | 0 | 4 | 1 | 1 | 0 | 0 | 0 | 0 | 0 | 0 | 1 | 0 |
| Otu01187 | 3 | 1 | 0 | 2 | 0 | 0 | 0 | 0 | 0 | 0 | 0 | 0 | 0 | 0 | 0 | 0 |
| Otu01188 | 1 | 1 | 0 | 0 | 0 | 0 | 0 | 0 | 0 | 0 | 0 | 0 | 0 | 0 | 0 | 0 |
| Otu01189 | 5 | 0 | 0 | 0 | 0 | 1 | 2 | 1 | 0 | 0 | 1 | 0 | 0 | 0 | 0 | 0 |
| Otu01190 | 6 | 0 | 0 | 0 | 0 | 0 | 0 | 2 | 2 | 0 | 1 | 1 | 0 | 0 | 0 | 0 |
| Otu01191 | 4 | 0 | 0 | 0 | 0 | 1 | 0 | 0 | 1 | 0 | 2 | 0 | 0 | 0 | 0 | 0 |
| Otu01192 | 4 | 0 | 0 | 0 | 0 | 4 | 0 | 0 | 0 | 0 | 0 | 0 | 0 | 0 | 0 | 0 |
| Otu01193 | 7 | 0 | 0 | 0 | 0 | 0 | 0 | 0 | 7 | 0 | 0 | 0 | 0 | 0 | 0 | 0 |
| Otu01194 | 1 | 0 | 1 | 0 | 0 | 0 | 0 | 0 | 0 | 0 | 0 | 0 | 0 | 0 | 0 | 0 |
| Otu01195 | 1 | 0 | 0 | 0 | 0 | 0 | 0 | 1 | 0 | 0 | 0 | 0 | 0 | 0 | 0 | 0 |
| Otu01196 | 5 | 0 | 0 | 0 | 1 | 4 | 0 | 0 | 0 | 0 | 0 | 0 | 0 | 0 | 0 | 0 |
| Otu01197 | 8 | 0 | 0 | 0 | 0 | 0 | 0 | 0 | 1 | 0 | 7 | 0 | 0 | 0 | 0 | 0 |
| Otu01198 | 5 | 0 | 0 | 0 | 0 | 0 | 1 | 3 | 1 | 0 | 0 | 0 | 0 | 0 | 0 | 0 |
| Otu01199 | 1 | 0 | 0 | 1 | 0 | 0 | 0 | 0 | 0 | 0 | 0 | 0 | 0 | 0 | 0 | 0 |
| Otu01200 | 5 | 0 | 0 | 0 | 0 | 3 | 0 | 1 | 1 | 0 | 0 | 0 | 0 | 0 | 0 | 0 |
| Otu01201 | 8 | 0 | 0 | 0 | 0 | 2 | 1 | 1 | 1 | 2 | 0 | 1 | 0 | 0 | 0 | 0 |

Supplementary 1  
 Taxonomy and Abundance of OTUs (see taxonomy of OTUs in Table S1A)  
 Normalized data, identification according to blast UNITEv7

|          |   |   |   |   |   |   |   |   |   |   |   |   |   |   |   |   |
|----------|---|---|---|---|---|---|---|---|---|---|---|---|---|---|---|---|
| Otu01202 | 5 | 0 | 1 | 0 | 4 | 0 | 0 | 0 | 0 | 0 | 0 | 0 | 0 | 0 | 0 | 0 |
| Otu01203 | 5 | 0 | 0 | 0 | 0 | 0 | 0 | 0 | 0 | 3 | 1 | 0 | 0 | 0 | 1 | 0 |
| Otu01204 | 5 | 0 | 0 | 0 | 0 | 0 | 0 | 2 | 2 | 0 | 0 | 1 | 0 | 0 | 0 | 0 |
| Otu01205 | 2 | 0 | 0 | 0 | 0 | 0 | 0 | 0 | 2 | 0 | 0 | 0 | 0 | 0 | 0 | 0 |
| Otu01206 | 4 | 0 | 0 | 0 | 0 | 0 | 0 | 2 | 0 | 0 | 1 | 0 | 0 | 0 | 0 | 1 |
| Otu01207 | 2 | 0 | 0 | 0 | 0 | 0 | 1 | 0 | 0 | 0 | 1 | 0 | 0 | 0 | 0 | 0 |
| Otu01209 | 7 | 0 | 0 | 0 | 0 | 0 | 0 | 0 | 0 | 0 | 7 | 0 | 0 | 0 | 0 | 0 |
| Otu01210 | 5 | 0 | 0 | 0 | 0 | 1 | 2 | 0 | 0 | 0 | 2 | 0 | 0 | 0 | 0 | 0 |
| Otu01211 | 1 | 0 | 0 | 1 | 0 | 0 | 0 | 0 | 0 | 0 | 0 | 0 | 0 | 0 | 0 | 0 |
| Otu01212 | 7 | 0 | 0 | 0 | 0 | 0 | 0 | 4 | 2 | 0 | 1 | 0 | 0 | 0 | 0 | 0 |
| Otu01213 | 2 | 0 | 0 | 0 | 0 | 1 | 0 | 0 | 0 | 1 | 0 | 0 | 0 | 0 | 0 | 0 |
| Otu01215 | 7 | 0 | 0 | 0 | 0 | 3 | 1 | 0 | 0 | 0 | 3 | 0 | 0 | 0 | 0 | 0 |
| Otu01216 | 7 | 0 | 0 | 0 | 0 | 0 | 5 | 0 | 2 | 0 | 0 | 0 | 0 | 0 | 0 | 0 |
| Otu01217 | 6 | 0 | 0 | 0 | 0 | 0 | 0 | 0 | 4 | 2 | 0 | 0 | 0 | 0 | 0 | 0 |
| Otu01218 | 3 | 0 | 0 | 0 | 0 | 0 | 0 | 0 | 0 | 0 | 0 | 0 | 0 | 0 | 3 | 0 |
| Otu01219 | 1 | 0 | 0 | 1 | 0 | 0 | 0 | 0 | 0 | 0 | 0 | 0 | 0 | 0 | 0 | 0 |
| Otu01220 | 2 | 0 | 0 | 1 | 1 | 0 | 0 | 0 | 0 | 0 | 0 | 0 | 0 | 0 | 0 | 0 |
| Otu01221 | 3 | 0 | 0 | 0 | 1 | 0 | 0 | 0 | 0 | 0 | 0 | 2 | 0 | 0 | 0 | 0 |
| Otu01223 | 5 | 0 | 0 | 0 | 0 | 1 | 0 | 0 | 0 | 3 | 1 | 0 | 0 | 0 | 0 | 0 |
| Otu01224 | 0 | 0 | 0 | 0 | 0 | 0 | 0 | 0 | 0 | 0 | 0 | 0 | 0 | 0 | 0 | 0 |
| Otu01225 | 7 | 0 | 0 | 0 | 0 | 0 | 2 | 0 | 2 | 2 | 1 | 0 | 0 | 0 | 0 | 0 |
| Otu01226 | 6 | 0 | 0 | 0 | 0 | 0 | 1 | 0 | 4 | 1 | 0 | 0 | 0 | 0 | 0 | 0 |
| Otu01227 | 4 | 0 | 0 | 0 | 0 | 1 | 0 | 0 | 1 | 1 | 1 | 0 | 0 | 0 | 0 | 0 |
| Otu01228 | 7 | 0 | 0 | 0 | 0 | 0 | 0 | 7 | 0 | 0 | 0 | 0 | 0 | 0 | 0 | 0 |
| Otu01229 | 5 | 0 | 0 | 0 | 0 | 2 | 0 | 0 | 1 | 2 | 0 | 0 | 0 | 0 | 0 | 0 |
| Otu01230 | 3 | 0 | 0 | 3 | 0 | 0 | 0 | 0 | 0 | 0 | 0 | 0 | 0 | 0 | 0 | 0 |
| Otu01231 | 1 | 0 | 0 | 0 | 0 | 0 | 0 | 0 | 1 | 0 | 0 | 0 | 0 | 0 | 0 | 0 |
| Otu01232 | 2 | 0 | 0 | 0 | 0 | 2 | 0 | 0 | 0 | 0 | 0 | 0 | 0 | 0 | 0 | 0 |
| Otu01233 | 6 | 0 | 0 | 6 | 0 | 0 | 0 | 0 | 0 | 0 | 0 | 0 | 0 | 0 | 0 | 0 |
| Otu01234 | 7 | 0 | 0 | 0 | 0 | 0 | 0 | 3 | 2 | 0 | 2 | 0 | 0 | 0 | 0 | 0 |
| Otu01235 | 4 | 0 | 0 | 0 | 0 | 1 | 0 | 1 | 1 | 1 | 0 | 0 | 0 | 0 | 0 | 0 |
| Otu01236 | 6 | 0 | 0 | 0 | 0 | 0 | 1 | 1 | 1 | 3 | 0 | 0 | 0 | 0 | 0 | 0 |
| Otu01237 | 3 | 1 | 2 | 0 | 0 | 0 | 0 | 0 | 0 | 0 | 0 | 0 | 0 | 0 | 0 | 0 |
| Otu01238 | 3 | 0 | 0 | 0 | 1 | 0 | 0 | 0 | 0 | 1 | 0 | 1 | 0 | 0 | 0 | 0 |
| Otu01239 | 2 | 1 | 1 | 0 | 0 | 0 | 0 | 0 | 0 | 0 | 0 | 0 | 0 | 0 | 0 | 0 |
| Otu01240 | 7 | 0 | 0 | 0 | 0 | 0 | 1 | 3 | 0 | 2 | 1 | 0 | 0 | 0 | 0 | 0 |
| Otu01243 | 6 | 0 | 0 | 0 | 0 | 2 | 1 | 2 | 1 | 0 | 0 | 0 | 0 | 0 | 0 | 0 |
| Otu01244 | 4 | 0 | 0 | 0 | 0 | 2 | 0 | 0 | 0 | 2 | 0 | 0 | 0 | 0 | 0 | 0 |
| Otu01245 | 5 | 0 | 0 | 2 | 0 | 0 | 0 | 1 | 1 | 1 | 0 | 0 | 0 | 0 | 0 | 0 |
| Otu01246 | 1 | 0 | 0 | 0 | 1 | 0 | 0 | 0 | 0 | 0 | 0 | 0 | 0 | 0 | 0 | 0 |
| Otu01247 | 6 | 1 | 0 | 0 | 5 | 0 | 0 | 0 | 0 | 0 | 0 | 0 | 0 | 0 | 0 | 0 |
| Otu01248 | 4 | 0 | 0 | 1 | 0 | 0 | 0 | 1 | 0 | 1 | 1 | 0 | 0 | 0 | 0 | 0 |
| Otu01249 | 5 | 0 | 0 | 5 | 0 | 0 | 0 | 0 | 0 | 0 | 0 | 0 | 0 | 0 | 0 | 0 |

Supplementary 1  
 Taxonomy and Abundance of OTUs (see taxonomy of OTUs in Table S1A)  
 Normalized data, identification according to blast UNITEv7

|          |   |   |   |   |   |   |   |   |   |   |   |   |   |   |   |   |
|----------|---|---|---|---|---|---|---|---|---|---|---|---|---|---|---|---|
| Otu01250 | 3 | 0 | 0 | 0 | 0 | 0 | 3 | 0 | 0 | 0 | 0 | 0 | 0 | 0 | 0 | 0 |
| Otu01251 | 6 | 0 | 0 | 0 | 0 | 0 | 0 | 0 | 2 | 2 | 1 | 0 | 0 | 0 | 0 | 1 |
| Otu01252 | 4 | 0 | 0 | 0 | 0 | 4 | 0 | 0 | 0 | 0 | 0 | 0 | 0 | 0 | 0 | 0 |
| Otu01253 | 6 | 0 | 0 | 0 | 0 | 0 | 0 | 0 | 0 | 2 | 4 | 0 | 0 | 0 | 0 | 0 |
| Otu01254 | 4 | 0 | 2 | 0 | 0 | 2 | 0 | 0 | 0 | 0 | 0 | 0 | 0 | 0 | 0 | 0 |
| Otu01255 | 7 | 0 | 0 | 0 | 0 | 0 | 0 | 0 | 7 | 0 | 0 | 0 | 0 | 0 | 0 | 0 |
| Otu01256 | 5 | 0 | 0 | 0 | 0 | 0 | 2 | 0 | 0 | 0 | 2 | 0 | 1 | 0 | 0 | 0 |
| Otu01257 | 5 | 0 | 0 | 0 | 0 | 0 | 1 | 0 | 1 | 1 | 0 | 1 | 1 | 0 | 0 | 0 |
| Otu01258 | 7 | 0 | 0 | 0 | 0 | 0 | 0 | 0 | 6 | 0 | 1 | 0 | 0 | 0 | 0 | 0 |
| Otu01259 | 2 | 0 | 0 | 0 | 0 | 0 | 0 | 0 | 1 | 0 | 0 | 0 | 1 | 0 | 0 | 0 |
| Otu01260 | 6 | 0 | 0 | 0 | 0 | 0 | 0 | 1 | 1 | 0 | 2 | 0 | 0 | 1 | 1 | 0 |
| Otu01262 | 5 | 0 | 3 | 2 | 0 | 0 | 0 | 0 | 0 | 0 | 0 | 0 | 0 | 0 | 0 | 0 |
| Otu01263 | 0 | 0 | 0 | 0 | 0 | 0 | 0 | 0 | 0 | 0 | 0 | 0 | 0 | 0 | 0 | 0 |
| Otu01264 | 4 | 0 | 0 | 0 | 0 | 2 | 0 | 0 | 1 | 1 | 0 | 0 | 0 | 0 | 0 | 0 |
| Otu01265 | 5 | 0 | 0 | 0 | 0 | 0 | 0 | 1 | 3 | 0 | 0 | 0 | 0 | 1 | 0 | 0 |
| Otu01266 | 5 | 0 | 0 | 0 | 0 | 0 | 0 | 4 | 0 | 0 | 1 | 0 | 0 | 0 | 0 | 0 |
| Otu01267 | 3 | 0 | 0 | 0 | 0 | 0 | 0 | 0 | 1 | 0 | 1 | 1 | 0 | 0 | 0 | 0 |
| Otu01268 | 0 | 0 | 0 | 0 | 0 | 0 | 0 | 0 | 0 | 0 | 0 | 0 | 0 | 0 | 0 | 0 |
| Otu01269 | 0 | 0 | 0 | 0 | 0 | 0 | 0 | 0 | 0 | 0 | 0 | 0 | 0 | 0 | 0 | 0 |
| Otu01270 | 6 | 0 | 0 | 0 | 0 | 0 | 1 | 2 | 0 | 1 | 2 | 0 | 0 | 0 | 0 | 0 |
| Otu01271 | 5 | 0 | 0 | 0 | 0 | 0 | 0 | 0 | 1 | 0 | 4 | 0 | 0 | 0 | 0 | 0 |
| Otu01272 | 3 | 0 | 0 | 0 | 0 | 1 | 1 | 0 | 1 | 0 | 0 | 0 | 0 | 0 | 0 | 0 |
| Otu01273 | 2 | 0 | 0 | 1 | 1 | 0 | 0 | 0 | 0 | 0 | 0 | 0 | 0 | 0 | 0 | 0 |
| Otu01274 | 2 | 0 | 1 | 0 | 0 | 0 | 0 | 0 | 1 | 0 | 0 | 0 | 0 | 0 | 0 | 0 |
| Otu01275 | 2 | 1 | 1 | 0 | 0 | 0 | 0 | 0 | 0 | 0 | 0 | 0 | 0 | 0 | 0 | 0 |
| Otu01276 | 0 | 0 | 0 | 0 | 0 | 0 | 0 | 0 | 0 | 0 | 0 | 0 | 0 | 0 | 0 | 0 |
| Otu01277 | 2 | 0 | 0 | 0 | 2 | 0 | 0 | 0 | 0 | 0 | 0 | 0 | 0 | 0 | 0 | 0 |
| Otu01278 | 1 | 0 | 0 | 0 | 0 | 0 | 0 | 0 | 0 | 1 | 0 | 0 | 0 | 0 | 0 | 0 |
| Otu01279 | 4 | 0 | 0 | 0 | 1 | 1 | 0 | 1 | 0 | 0 | 1 | 0 | 0 | 0 | 0 | 0 |
| Otu01280 | 3 | 0 | 0 | 0 | 3 | 0 | 0 | 0 | 0 | 0 | 0 | 0 | 0 | 0 | 0 | 0 |
| Otu01281 | 2 | 0 | 0 | 0 | 0 | 0 | 0 | 0 | 0 | 0 | 1 | 0 | 1 | 0 | 0 | 0 |
| Otu01282 | 4 | 0 | 0 | 0 | 0 | 0 | 2 | 0 | 1 | 1 | 0 | 0 | 0 | 0 | 0 | 0 |
| Otu01284 | 1 | 1 | 0 | 0 | 0 | 0 | 0 | 0 | 0 | 0 | 0 | 0 | 0 | 0 | 0 | 0 |
| Otu01285 | 2 | 2 | 0 | 0 | 0 | 0 | 0 | 0 | 0 | 0 | 0 | 0 | 0 | 0 | 0 | 0 |
| Otu01286 | 3 | 0 | 0 | 0 | 0 | 0 | 0 | 2 | 0 | 1 | 0 | 0 | 0 | 0 | 0 | 0 |
| Otu01287 | 4 | 0 | 0 | 1 | 0 | 0 | 0 | 0 | 1 | 0 | 1 | 1 | 0 | 0 | 0 | 0 |
| Otu01288 | 2 | 0 | 0 | 0 | 1 | 1 | 0 | 0 | 0 | 0 | 0 | 0 | 0 | 0 | 0 | 0 |
| Otu01289 | 4 | 0 | 0 | 0 | 0 | 2 | 0 | 0 | 1 | 1 | 0 | 0 | 0 | 0 | 0 | 0 |
| Otu01290 | 3 | 0 | 0 | 3 | 0 | 0 | 0 | 0 | 0 | 0 | 0 | 0 | 0 | 0 | 0 | 0 |
| Otu01291 | 2 | 0 | 0 | 0 | 0 | 0 | 0 | 1 | 0 | 0 | 0 | 1 | 0 | 0 | 0 | 0 |
| Otu01292 | 6 | 0 | 0 | 0 | 0 | 0 | 0 | 1 | 2 | 1 | 2 | 0 | 0 | 0 | 0 | 0 |
| Otu01293 | 4 | 0 | 0 | 0 | 0 | 0 | 3 | 1 | 0 | 0 | 0 | 0 | 0 | 0 | 0 | 0 |
| Otu01294 | 1 | 0 | 0 | 0 | 0 | 0 | 0 | 0 | 0 | 1 | 0 | 0 | 0 | 0 | 0 | 0 |

Supplementary 1  
 Taxonomy and Abundance of OTUs (see taxonomy of OTUs in Table S1A)  
 Normalized data, identification according to blast UNITEv7

|          |   |   |   |   |   |   |   |   |   |   |   |   |   |   |   |   |
|----------|---|---|---|---|---|---|---|---|---|---|---|---|---|---|---|---|
| Otu01295 | 1 | 0 | 1 | 0 | 0 | 0 | 0 | 0 | 0 | 0 | 0 | 0 | 0 | 0 | 0 | 0 |
| Otu01296 | 2 | 2 | 0 | 0 | 0 | 0 | 0 | 0 | 0 | 0 | 0 | 0 | 0 | 0 | 0 | 0 |
| Otu01297 | 2 | 0 | 0 | 0 | 0 | 2 | 0 | 0 | 0 | 0 | 0 | 0 | 0 | 0 | 0 | 0 |
| Otu01298 | 4 | 0 | 0 | 0 | 0 | 3 | 0 | 0 | 1 | 0 | 0 | 0 | 0 | 0 | 0 | 0 |
| Otu01299 | 3 | 0 | 0 | 0 | 0 | 0 | 0 | 0 | 0 | 0 | 0 | 2 | 1 | 0 | 0 | 0 |
| Otu01300 | 3 | 0 | 0 | 0 | 0 | 1 | 0 | 1 | 1 | 0 | 0 | 0 | 0 | 0 | 0 | 0 |
| Otu01301 | 6 | 0 | 0 | 0 | 0 | 0 | 0 | 0 | 6 | 0 | 0 | 0 | 0 | 0 | 0 | 0 |
| Otu01303 | 6 | 0 | 0 | 0 | 0 | 0 | 0 | 3 | 3 | 0 | 0 | 0 | 0 | 0 | 0 | 0 |
| Otu01304 | 3 | 0 | 0 | 0 | 0 | 0 | 0 | 0 | 1 | 0 | 1 | 0 | 1 | 0 | 0 | 0 |
| Otu01305 | 3 | 0 | 0 | 0 | 0 | 1 | 0 | 0 | 0 | 0 | 0 | 0 | 0 | 0 | 0 | 2 |
| Otu01306 | 0 | 0 | 0 | 0 | 0 | 0 | 0 | 0 | 0 | 0 | 0 | 0 | 0 | 0 | 0 | 0 |
| Otu01307 | 4 | 0 | 0 | 0 | 0 | 0 | 0 | 0 | 2 | 0 | 0 | 2 | 0 | 0 | 0 | 0 |
| Otu01308 | 4 | 0 | 0 | 0 | 0 | 0 | 0 | 0 | 0 | 0 | 0 | 2 | 2 | 0 | 0 | 0 |
| Otu01310 | 4 | 0 | 0 | 0 | 0 | 2 | 0 | 0 | 0 | 1 | 1 | 0 | 0 | 0 | 0 | 0 |
| Otu01311 | 3 | 0 | 0 | 0 | 2 | 0 | 0 | 0 | 1 | 0 | 0 | 0 | 0 | 0 | 0 | 0 |
| Otu01312 | 4 | 3 | 1 | 0 | 0 | 0 | 0 | 0 | 0 | 0 | 0 | 0 | 0 | 0 | 0 | 0 |
| Otu01313 | 3 | 0 | 0 | 0 | 0 | 0 | 0 | 0 | 1 | 1 | 0 | 0 | 0 | 0 | 1 | 0 |
| Otu01315 | 5 | 0 | 0 | 0 | 0 | 0 | 3 | 0 | 1 | 0 | 0 | 1 | 0 | 0 | 0 | 0 |
| Otu01316 | 3 | 0 | 0 | 0 | 0 | 0 | 0 | 1 | 0 | 0 | 0 | 2 | 0 | 0 | 0 | 0 |
| Otu01318 | 6 | 0 | 0 | 6 | 0 | 0 | 0 | 0 | 0 | 0 | 0 | 0 | 0 | 0 | 0 | 0 |
| Otu01319 | 4 | 2 | 1 | 0 | 0 | 0 | 0 | 1 | 0 | 0 | 0 | 0 | 0 | 0 | 0 | 0 |
| Otu01320 | 6 | 0 | 0 | 0 | 0 | 1 | 0 | 1 | 0 | 2 | 1 | 1 | 0 | 0 | 0 | 0 |
| Otu01321 | 4 | 2 | 0 | 2 | 0 | 0 | 0 | 0 | 0 | 0 | 0 | 0 | 0 | 0 | 0 | 0 |
| Otu01322 | 0 | 0 | 0 | 0 | 0 | 0 | 0 | 0 | 0 | 0 | 0 | 0 | 0 | 0 | 0 | 0 |
| Otu01324 | 2 | 0 | 0 | 0 | 0 | 0 | 1 | 0 | 0 | 0 | 0 | 0 | 0 | 0 | 1 | 0 |
| Otu01325 | 4 | 0 | 0 | 0 | 0 | 1 | 1 | 1 | 1 | 0 | 0 | 0 | 0 | 0 | 0 | 0 |
| Otu01326 | 3 | 1 | 2 | 0 | 0 | 0 | 0 | 0 | 0 | 0 | 0 | 0 | 0 | 0 | 0 | 0 |
| Otu01327 | 6 | 0 | 0 | 0 | 0 | 0 | 4 | 0 | 2 | 0 | 0 | 0 | 0 | 0 | 0 | 0 |
| Otu01328 | 3 | 0 | 0 | 0 | 0 | 0 | 0 | 0 | 0 | 1 | 0 | 1 | 0 | 1 | 0 | 0 |
| Otu01329 | 2 | 0 | 0 | 0 | 0 | 0 | 0 | 0 | 1 | 1 | 0 | 0 | 0 | 0 | 0 | 0 |
| Otu01330 | 4 | 0 | 0 | 0 | 0 | 2 | 0 | 0 | 0 | 1 | 1 | 0 | 0 | 0 | 0 | 0 |
| Otu01331 | 5 | 0 | 0 | 0 | 0 | 0 | 0 | 4 | 1 | 0 | 0 | 0 | 0 | 0 | 0 | 0 |
| Otu01332 | 4 | 0 | 0 | 0 | 0 | 1 | 0 | 0 | 1 | 1 | 1 | 0 | 0 | 0 | 0 | 0 |
| Otu01333 | 5 | 0 | 0 | 0 | 0 | 0 | 0 | 0 | 0 | 1 | 2 | 0 | 0 | 0 | 2 | 0 |
| Otu01334 | 3 | 0 | 0 | 0 | 0 | 1 | 1 | 0 | 0 | 0 | 0 | 1 | 0 | 0 | 0 | 0 |
| Otu01335 | 3 | 0 | 0 | 0 | 0 | 0 | 1 | 0 | 0 | 0 | 0 | 2 | 0 | 0 | 0 | 0 |
| Otu01336 | 4 | 0 | 0 | 0 | 0 | 4 | 0 | 0 | 0 | 0 | 0 | 0 | 0 | 0 | 0 | 0 |
| Otu01337 | 5 | 0 | 0 | 0 | 0 | 0 | 0 | 0 | 5 | 0 | 0 | 0 | 0 | 0 | 0 | 0 |
| Otu01339 | 2 | 0 | 0 | 2 | 0 | 0 | 0 | 0 | 0 | 0 | 0 | 0 | 0 | 0 | 0 | 0 |
| Otu01340 | 5 | 0 | 0 | 0 | 0 | 0 | 0 | 0 | 0 | 2 | 2 | 1 | 0 | 0 | 0 | 0 |
| Otu01341 | 4 | 4 | 0 | 0 | 0 | 0 | 0 | 0 | 0 | 0 | 0 | 0 | 0 | 0 | 0 | 0 |
| Otu01342 | 4 | 4 | 0 | 0 | 0 | 0 | 0 | 0 | 0 | 0 | 0 | 0 | 0 | 0 | 0 | 0 |
| Otu01343 | 1 | 0 | 0 | 0 | 0 | 0 | 0 | 0 | 1 | 0 | 0 | 0 | 0 | 0 | 0 | 0 |

Supplementary 1  
 Taxonomy and Abundance of OTUs (see taxonomy of OTUs in Table S1A)  
 Normalized data, identification according to blast UNITEv7

|          |   |   |   |   |   |   |   |   |   |   |   |   |   |   |   |   |
|----------|---|---|---|---|---|---|---|---|---|---|---|---|---|---|---|---|
| Otu01344 | 6 | 0 | 0 | 0 | 0 | 0 | 0 | 2 | 0 | 2 | 2 | 0 | 0 | 0 | 0 | 0 |
| Otu01345 | 6 | 0 | 0 | 0 | 0 | 0 | 0 | 0 | 0 | 4 | 1 | 1 | 0 | 0 | 0 | 0 |
| Otu01346 | 3 | 0 | 1 | 0 | 0 | 0 | 0 | 0 | 0 | 1 | 0 | 1 | 0 | 0 | 0 | 0 |
| Otu01347 | 4 | 0 | 0 | 0 | 0 | 0 | 0 | 1 | 0 | 1 | 1 | 0 | 0 | 0 | 1 | 0 |
| Otu01348 | 6 | 0 | 0 | 0 | 0 | 0 | 0 | 0 | 2 | 1 | 0 | 2 | 0 | 0 | 0 | 1 |
| Otu01349 | 3 | 0 | 0 | 0 | 0 | 2 | 0 | 0 | 0 | 1 | 0 | 0 | 0 | 0 | 0 | 0 |
| Otu01350 | 3 | 0 | 0 | 0 | 1 | 2 | 0 | 0 | 0 | 0 | 0 | 0 | 0 | 0 | 0 | 0 |
| Otu01351 | 4 | 0 | 0 | 0 | 0 | 0 | 1 | 0 | 1 | 1 | 1 | 0 | 0 | 0 | 0 | 0 |
| Otu01352 | 6 | 0 | 0 | 0 | 0 | 0 | 0 | 0 | 0 | 5 | 1 | 0 | 0 | 0 | 0 | 0 |
| Otu01353 | 2 | 0 | 0 | 0 | 0 | 0 | 0 | 0 | 0 | 0 | 0 | 0 | 0 | 2 | 0 | 0 |
| Otu01354 | 1 | 0 | 0 | 0 | 0 | 0 | 1 | 0 | 0 | 0 | 0 | 0 | 0 | 0 | 0 | 0 |
| Otu01356 | 3 | 0 | 0 | 0 | 0 | 0 | 0 | 2 | 0 | 1 | 0 | 0 | 0 | 0 | 0 | 0 |
| Otu01357 | 5 | 0 | 0 | 0 | 0 | 0 | 0 | 0 | 1 | 0 | 0 | 1 | 1 | 0 | 0 | 2 |
| Otu01359 | 5 | 0 | 0 | 0 | 0 | 0 | 0 | 2 | 2 | 1 | 0 | 0 | 0 | 0 | 0 | 0 |
| Otu01360 | 6 | 0 | 0 | 0 | 0 | 0 | 3 | 1 | 0 | 2 | 0 | 0 | 0 | 0 | 0 | 0 |
| Otu01361 | 5 | 0 | 0 | 0 | 0 | 0 | 1 | 1 | 2 | 1 | 0 | 0 | 0 | 0 | 0 | 0 |
| Otu01362 | 3 | 0 | 0 | 0 | 0 | 0 | 0 | 0 | 0 | 1 | 2 | 0 | 0 | 0 | 0 | 0 |
| Otu01363 | 5 | 0 | 0 | 0 | 1 | 0 | 3 | 0 | 0 | 1 | 0 | 0 | 0 | 0 | 0 | 0 |
| Otu01364 | 4 | 0 | 0 | 0 | 0 | 0 | 4 | 0 | 0 | 0 | 0 | 0 | 0 | 0 | 0 | 0 |
| Otu01365 | 3 | 0 | 0 | 0 | 0 | 0 | 0 | 2 | 1 | 0 | 0 | 0 | 0 | 0 | 0 | 0 |
| Otu01366 | 2 | 0 | 0 | 0 | 0 | 2 | 0 | 0 | 0 | 0 | 0 | 0 | 0 | 0 | 0 | 0 |
| Otu01367 | 2 | 0 | 0 | 0 | 2 | 0 | 0 | 0 | 0 | 0 | 0 | 0 | 0 | 0 | 0 | 0 |
| Otu01368 | 3 | 0 | 2 | 0 | 0 | 0 | 0 | 0 | 1 | 0 | 0 | 0 | 0 | 0 | 0 | 0 |
| Otu01369 | 3 | 0 | 0 | 0 | 0 | 1 | 0 | 0 | 2 | 0 | 0 | 0 | 0 | 0 | 0 | 0 |
| Otu01371 | 1 | 0 | 0 | 0 | 1 | 0 | 0 | 0 | 0 | 0 | 0 | 0 | 0 | 0 | 0 | 0 |
| Otu01372 | 4 | 0 | 0 | 0 | 0 | 0 | 0 | 1 | 0 | 1 | 0 | 2 | 0 | 0 | 0 | 0 |
| Otu01373 | 1 | 0 | 0 | 0 | 0 | 0 | 0 | 0 | 1 | 0 | 0 | 0 | 0 | 0 | 0 | 0 |
| Otu01374 | 1 | 0 | 0 | 0 | 0 | 0 | 1 | 0 | 0 | 0 | 0 | 0 | 0 | 0 | 0 | 0 |
| Otu01375 | 2 | 0 | 1 | 0 | 1 | 0 | 0 | 0 | 0 | 0 | 0 | 0 | 0 | 0 | 0 | 0 |
| Otu01376 | 5 | 0 | 0 | 0 | 0 | 0 | 1 | 0 | 2 | 0 | 1 | 0 | 0 | 0 | 1 | 0 |
| Otu01377 | 2 | 0 | 0 | 0 | 2 | 0 | 0 | 0 | 0 | 0 | 0 | 0 | 0 | 0 | 0 | 0 |
| Otu01378 | 1 | 0 | 0 | 0 | 0 | 0 | 0 | 0 | 0 | 0 | 0 | 1 | 0 | 0 | 0 | 0 |
| Otu01379 | 4 | 0 | 0 | 4 | 0 | 0 | 0 | 0 | 0 | 0 | 0 | 0 | 0 | 0 | 0 | 0 |
| Otu01380 | 5 | 0 | 0 | 0 | 0 | 5 | 0 | 0 | 0 | 0 | 0 | 0 | 0 | 0 | 0 | 0 |
| Otu01381 | 5 | 0 | 0 | 0 | 0 | 1 | 3 | 0 | 0 | 1 | 0 | 0 | 0 | 0 | 0 | 0 |
| Otu01382 | 1 | 1 | 0 | 0 | 0 | 0 | 0 | 0 | 0 | 0 | 0 | 0 | 0 | 0 | 0 | 0 |
| Otu01383 | 4 | 0 | 0 | 2 | 0 | 2 | 0 | 0 | 0 | 0 | 0 | 0 | 0 | 0 | 0 | 0 |
| Otu01384 | 4 | 4 | 0 | 0 | 0 | 0 | 0 | 0 | 0 | 0 | 0 | 0 | 0 | 0 | 0 | 0 |
| Otu01385 | 5 | 0 | 0 | 0 | 0 | 0 | 0 | 0 | 5 | 0 | 0 | 0 | 0 | 0 | 0 | 0 |
| Otu01386 | 5 | 0 | 0 | 5 | 0 | 0 | 0 | 0 | 0 | 0 | 0 | 0 | 0 | 0 | 0 | 0 |
| Otu01387 | 4 | 0 | 0 | 0 | 0 | 0 | 1 | 0 | 0 | 2 | 0 | 1 | 0 | 0 | 0 | 0 |
| Otu01388 | 3 | 0 | 0 | 0 | 0 | 2 | 1 | 0 | 0 | 0 | 0 | 0 | 0 | 0 | 0 | 0 |
| Otu01389 | 4 | 0 | 0 | 0 | 0 | 0 | 0 | 1 | 3 | 0 | 0 | 0 | 0 | 0 | 0 | 0 |

Supplementary 1  
 Taxonomy and Abundance of OTUs (see taxonomy of OTUs in Table S1A)  
 Normalized data, identification according to blast UNITEv7

|          |   |   |   |   |   |   |   |   |   |   |   |   |   |   |   |   |   |
|----------|---|---|---|---|---|---|---|---|---|---|---|---|---|---|---|---|---|
| Otu01390 | 3 | 0 | 0 | 0 | 0 | 2 | 0 | 1 | 0 | 0 | 0 | 0 | 0 | 0 | 0 | 0 | 0 |
| Otu01391 | 0 | 0 | 0 | 0 | 0 | 0 | 0 | 0 | 0 | 0 | 0 | 0 | 0 | 0 | 0 | 0 | 0 |
| Otu01393 | 3 | 0 | 0 | 0 | 0 | 0 | 2 | 0 | 0 | 0 | 0 | 0 | 0 | 0 | 0 | 1 | 0 |
| Otu01394 | 1 | 0 | 0 | 0 | 0 | 0 | 0 | 0 | 0 | 0 | 0 | 1 | 0 | 0 | 0 | 0 | 0 |
| Otu01395 | 5 | 0 | 0 | 0 | 0 | 0 | 0 | 2 | 1 | 2 | 0 | 0 | 0 | 0 | 0 | 0 | 0 |
| Otu01396 | 1 | 0 | 0 | 0 | 0 | 0 | 1 | 0 | 0 | 0 | 0 | 0 | 0 | 0 | 0 | 0 | 0 |
| Otu01397 | 1 | 1 | 0 | 0 | 0 | 0 | 0 | 0 | 0 | 0 | 0 | 0 | 0 | 0 | 0 | 0 | 0 |
| Otu01398 | 3 | 0 | 0 | 0 | 0 | 0 | 0 | 3 | 0 | 0 | 0 | 0 | 0 | 0 | 0 | 0 | 0 |
| Otu01399 | 3 | 0 | 2 | 0 | 0 | 0 | 0 | 0 | 1 | 0 | 0 | 0 | 0 | 0 | 0 | 0 | 0 |
| Otu01400 | 2 | 0 | 0 | 0 | 1 | 1 | 0 | 0 | 0 | 0 | 0 | 0 | 0 | 0 | 0 | 0 | 0 |
| Otu01401 | 4 | 0 | 0 | 0 | 0 | 0 | 0 | 1 | 0 | 2 | 1 | 0 | 0 | 0 | 0 | 0 | 0 |
| Otu01402 | 1 | 0 | 0 | 0 | 0 | 0 | 0 | 0 | 0 | 1 | 0 | 0 | 0 | 0 | 0 | 0 | 0 |
| Otu01403 | 4 | 0 | 0 | 0 | 0 | 0 | 1 | 0 | 2 | 1 | 0 | 0 | 0 | 0 | 0 | 0 | 0 |
| Otu01404 | 1 | 0 | 0 | 0 | 0 | 0 | 1 | 0 | 0 | 0 | 0 | 0 | 0 | 0 | 0 | 0 | 0 |
| Otu01405 | 5 | 0 | 0 | 0 | 0 | 0 | 0 | 2 | 2 | 0 | 1 | 0 | 0 | 0 | 0 | 0 | 0 |
| Otu01406 | 3 | 0 | 0 | 0 | 0 | 3 | 0 | 0 | 0 | 0 | 0 | 0 | 0 | 0 | 0 | 0 | 0 |
| Otu01407 | 5 | 0 | 0 | 0 | 0 | 0 | 1 | 0 | 2 | 1 | 1 | 0 | 0 | 0 | 0 | 0 | 0 |
| Otu01408 | 5 | 0 | 0 | 0 | 0 | 0 | 0 | 0 | 4 | 0 | 1 | 0 | 0 | 0 | 0 | 0 | 0 |
| Otu01410 | 3 | 0 | 0 | 0 | 0 | 0 | 0 | 0 | 0 | 0 | 0 | 0 | 1 | 0 | 2 | 0 | 0 |
| Otu01411 | 1 | 1 | 0 | 0 | 0 | 0 | 0 | 0 | 0 | 0 | 0 | 0 | 0 | 0 | 0 | 0 | 0 |
| Otu01412 | 2 | 0 | 0 | 2 | 0 | 0 | 0 | 0 | 0 | 0 | 0 | 0 | 0 | 0 | 0 | 0 | 0 |
| Otu01413 | 3 | 0 | 0 | 0 | 1 | 2 | 0 | 0 | 0 | 0 | 0 | 0 | 0 | 0 | 0 | 0 | 0 |
| Otu01414 | 1 | 0 | 0 | 0 | 0 | 0 | 0 | 0 | 1 | 0 | 0 | 0 | 0 | 0 | 0 | 0 | 0 |
| Otu01415 | 3 | 0 | 0 | 0 | 0 | 1 | 1 | 0 | 0 | 1 | 0 | 0 | 0 | 0 | 0 | 0 | 0 |
| Otu01416 | 1 | 0 | 1 | 0 | 0 | 0 | 0 | 0 | 0 | 0 | 0 | 0 | 0 | 0 | 0 | 0 | 0 |
| Otu01417 | 1 | 0 | 0 | 0 | 1 | 0 | 0 | 0 | 0 | 0 | 0 | 0 | 0 | 0 | 0 | 0 | 0 |
| Otu01418 | 5 | 0 | 0 | 0 | 0 | 0 | 0 | 0 | 0 | 0 | 5 | 0 | 0 | 0 | 0 | 0 | 0 |
| Otu01419 | 4 | 0 | 0 | 4 | 0 | 0 | 0 | 0 | 0 | 0 | 0 | 0 | 0 | 0 | 0 | 0 | 0 |
| Otu01420 | 4 | 0 | 0 | 0 | 0 | 0 | 2 | 1 | 0 | 1 | 0 | 0 | 0 | 0 | 0 | 0 | 0 |
| Otu01421 | 4 | 0 | 0 | 0 | 0 | 0 | 3 | 0 | 0 | 0 | 0 | 1 | 0 | 0 | 0 | 0 | 0 |
| Otu01422 | 3 | 0 | 0 | 0 | 0 | 0 | 0 | 0 | 2 | 1 | 0 | 0 | 0 | 0 | 0 | 0 | 0 |
| Otu01423 | 2 | 0 | 0 | 0 | 0 | 0 | 0 | 0 | 0 | 0 | 0 | 0 | 0 | 0 | 0 | 2 | 0 |
| Otu01424 | 2 | 0 | 2 | 0 | 0 | 0 | 0 | 0 | 0 | 0 | 0 | 0 | 0 | 0 | 0 | 0 | 0 |
| Otu01425 | 1 | 0 | 0 | 0 | 0 | 0 | 0 | 0 | 0 | 0 | 0 | 1 | 0 | 0 | 0 | 0 | 0 |
| Otu01426 | 4 | 0 | 0 | 0 | 0 | 0 | 0 | 0 | 1 | 0 | 2 | 1 | 0 | 0 | 0 | 0 | 0 |
| Otu01427 | 2 | 0 | 2 | 0 | 0 | 0 | 0 | 0 | 0 | 0 | 0 | 0 | 0 | 0 | 0 | 0 | 0 |
| Otu01428 | 5 | 0 | 0 | 0 | 0 | 0 | 0 | 5 | 0 | 0 | 0 | 0 | 0 | 0 | 0 | 0 | 0 |
| Otu01429 | 1 | 0 | 0 | 0 | 0 | 0 | 1 | 0 | 0 | 0 | 0 | 0 | 0 | 0 | 0 | 0 | 0 |
| Otu01430 | 2 | 0 | 0 | 0 | 0 | 0 | 2 | 0 | 0 | 0 | 0 | 0 | 0 | 0 | 0 | 0 | 0 |
| Otu01431 | 2 | 0 | 0 | 0 | 2 | 0 | 0 | 0 | 0 | 0 | 0 | 0 | 0 | 0 | 0 | 0 | 0 |
| Otu01432 | 3 | 0 | 0 | 0 | 0 | 0 | 0 | 1 | 0 | 0 | 1 | 0 | 0 | 1 | 0 | 0 | 0 |
| Otu01433 | 3 | 0 | 0 | 0 | 0 | 0 | 0 | 2 | 0 | 0 | 1 | 0 | 0 | 0 | 0 | 0 | 0 |
| Otu01434 | 4 | 0 | 0 | 0 | 0 | 1 | 0 | 0 | 0 | 1 | 2 | 0 | 0 | 0 | 0 | 0 | 0 |



Supplementary 1  
 Taxonomy and Abundance of OTUs (see taxonomy of OTUs in Table S1A)  
 Normalized data, identification according to blast UNITEv7

|          |   |   |   |   |   |   |   |   |   |   |   |   |   |   |   |   |
|----------|---|---|---|---|---|---|---|---|---|---|---|---|---|---|---|---|
| Otu01435 | 4 | 0 | 0 | 0 | 0 | 0 | 0 | 0 | 0 | 2 | 1 | 1 | 0 | 0 | 0 | 0 |
| Otu01437 | 2 | 0 | 0 | 0 | 0 | 0 | 0 | 0 | 0 | 0 | 0 | 0 | 0 | 0 | 2 | 0 |
| Otu01438 | 3 | 0 | 0 | 0 | 3 | 0 | 0 | 0 | 0 | 0 | 0 | 0 | 0 | 0 | 0 | 0 |
| Otu01439 | 0 | 0 | 0 | 0 | 0 | 0 | 0 | 0 | 0 | 0 | 0 | 0 | 0 | 0 | 0 | 0 |
| Otu01440 | 5 | 0 | 0 | 0 | 0 | 0 | 0 | 1 | 4 | 0 | 0 | 0 | 0 | 0 | 0 | 0 |
| Otu01441 | 1 | 0 | 0 | 0 | 0 | 0 | 0 | 1 | 0 | 0 | 0 | 0 | 0 | 0 | 0 | 0 |
| Otu01442 | 5 | 0 | 0 | 0 | 0 | 0 | 0 | 0 | 2 | 0 | 3 | 0 | 0 | 0 | 0 | 0 |
| Otu01443 | 2 | 0 | 0 | 0 | 0 | 0 | 0 | 0 | 1 | 1 | 0 | 0 | 0 | 0 | 0 | 0 |
| Otu01444 | 4 | 0 | 0 | 0 | 0 | 0 | 4 | 0 | 0 | 0 | 0 | 0 | 0 | 0 | 0 | 0 |
| Otu01445 | 5 | 0 | 0 | 0 | 0 | 0 | 0 | 2 | 0 | 1 | 2 | 0 | 0 | 0 | 0 | 0 |
| Otu01446 | 1 | 0 | 0 | 0 | 1 | 0 | 0 | 0 | 0 | 0 | 0 | 0 | 0 | 0 | 0 | 0 |
| Otu01447 | 4 | 3 | 0 | 1 | 0 | 0 | 0 | 0 | 0 | 0 | 0 | 0 | 0 | 0 | 0 | 0 |
| Otu01448 | 2 | 0 | 0 | 2 | 0 | 0 | 0 | 0 | 0 | 0 | 0 | 0 | 0 | 0 | 0 | 0 |
| Otu01449 | 2 | 0 | 0 | 1 | 0 | 1 | 0 | 0 | 0 | 0 | 0 | 0 | 0 | 0 | 0 | 0 |
| Otu01450 | 2 | 0 | 0 | 0 | 0 | 0 | 0 | 0 | 0 | 1 | 1 | 0 | 0 | 0 | 0 | 0 |
| Otu01451 | 1 | 0 | 0 | 0 | 0 | 1 | 0 | 0 | 0 | 0 | 0 | 0 | 0 | 0 | 0 | 0 |
| Otu01452 | 3 | 0 | 2 | 1 | 0 | 0 | 0 | 0 | 0 | 0 | 0 | 0 | 0 | 0 | 0 | 0 |
| Otu01454 | 2 | 0 | 0 | 0 | 0 | 0 | 0 | 0 | 0 | 2 | 0 | 0 | 0 | 0 | 0 | 0 |
| Otu01455 | 1 | 0 | 0 | 1 | 0 | 0 | 0 | 0 | 0 | 0 | 0 | 0 | 0 | 0 | 0 | 0 |
| Otu01456 | 4 | 0 | 0 | 0 | 0 | 0 | 1 | 0 | 1 | 0 | 1 | 0 | 0 | 0 | 1 | 0 |
| Otu01457 | 3 | 0 | 0 | 0 | 0 | 0 | 0 | 1 | 0 | 2 | 0 | 0 | 0 | 0 | 0 | 0 |
| Otu01458 | 2 | 0 | 0 | 0 | 1 | 0 | 0 | 0 | 0 | 1 | 0 | 0 | 0 | 0 | 0 | 0 |
| Otu01460 | 2 | 0 | 0 | 0 | 1 | 1 | 0 | 0 | 0 | 0 | 0 | 0 | 0 | 0 | 0 | 0 |
| Otu01461 | 5 | 0 | 0 | 0 | 0 | 0 | 0 | 2 | 2 | 0 | 0 | 1 | 0 | 0 | 0 | 0 |
| Otu01462 | 1 | 0 | 1 | 0 | 0 | 0 | 0 | 0 | 0 | 0 | 0 | 0 | 0 | 0 | 0 | 0 |
| Otu01464 | 1 | 0 | 0 | 1 | 0 | 0 | 0 | 0 | 0 | 0 | 0 | 0 | 0 | 0 | 0 | 0 |
| Otu01465 | 2 | 1 | 0 | 1 | 0 | 0 | 0 | 0 | 0 | 0 | 0 | 0 | 0 | 0 | 0 | 0 |
| Otu01466 | 4 | 0 | 0 | 0 | 0 | 0 | 0 | 2 | 1 | 1 | 0 | 0 | 0 | 0 | 0 | 0 |
| Otu01467 | 3 | 0 | 0 | 0 | 0 | 0 | 0 | 0 | 0 | 0 | 0 | 2 | 0 | 0 | 0 | 1 |
| Otu01468 | 5 | 0 | 0 | 0 | 0 | 0 | 0 | 0 | 0 | 0 | 5 | 0 | 0 | 0 | 0 | 0 |
| Otu01469 | 5 | 0 | 0 | 0 | 0 | 0 | 0 | 1 | 2 | 0 | 2 | 0 | 0 | 0 | 0 | 0 |
| Otu01470 | 1 | 0 | 0 | 0 | 0 | 0 | 0 | 1 | 0 | 0 | 0 | 0 | 0 | 0 | 0 | 0 |
| Otu01471 | 3 | 0 | 0 | 0 | 0 | 1 | 0 | 0 | 0 | 0 | 2 | 0 | 0 | 0 | 0 | 0 |
| Otu01472 | 1 | 0 | 0 | 0 | 0 | 0 | 0 | 1 | 0 | 0 | 0 | 0 | 0 | 0 | 0 | 0 |
| Otu01473 | 3 | 0 | 0 | 0 | 0 | 0 | 0 | 1 | 0 | 0 | 1 | 0 | 0 | 0 | 0 | 1 |
| Otu01474 | 2 | 0 | 2 | 0 | 0 | 0 | 0 | 0 | 0 | 0 | 0 | 0 | 0 | 0 | 0 | 0 |
| Otu01475 | 5 | 0 | 0 | 0 | 0 | 0 | 0 | 4 | 0 | 0 | 0 | 1 | 0 | 0 | 0 | 0 |
| Otu01476 | 4 | 0 | 0 | 4 | 0 | 0 | 0 | 0 | 0 | 0 | 0 | 0 | 0 | 0 | 0 | 0 |
| Otu01477 | 1 | 0 | 0 | 0 | 0 | 1 | 0 | 0 | 0 | 0 | 0 | 0 | 0 | 0 | 0 | 0 |
| Otu01478 | 4 | 0 | 0 | 0 | 0 | 1 | 0 | 0 | 0 | 0 | 1 | 1 | 0 | 0 | 0 | 1 |
| Otu01479 | 1 | 0 | 0 | 0 | 1 | 0 | 0 | 0 | 0 | 0 | 0 | 0 | 0 | 0 | 0 | 0 |
| Otu01480 | 3 | 0 | 0 | 0 | 0 | 0 | 0 | 1 | 0 | 1 | 0 | 1 | 0 | 0 | 0 | 0 |
| Otu01482 | 3 | 0 | 0 | 0 | 0 | 0 | 1 | 2 | 0 | 0 | 0 | 0 | 0 | 0 | 0 | 0 |

Supplementary 1  
 Taxonomy and Abundance of OTUs (see taxonomy of OTUs in Table S1A)  
 Normalized data, identification according to blast UNITEv7

|          |   |   |   |   |   |   |   |   |   |   |   |   |   |   |   |   |
|----------|---|---|---|---|---|---|---|---|---|---|---|---|---|---|---|---|
| Otu01483 | 5 | 0 | 0 | 0 | 0 | 0 | 0 | 0 | 0 | 3 | 2 | 0 | 0 | 0 | 0 | 0 |
| Otu01484 | 3 | 0 | 0 | 0 | 0 | 0 | 0 | 0 | 0 | 0 | 0 | 0 | 0 | 0 | 3 | 0 |
| Otu01486 | 4 | 0 | 0 | 0 | 0 | 1 | 1 | 0 | 1 | 0 | 1 | 0 | 0 | 0 | 0 | 0 |
| Otu01487 | 1 | 0 | 0 | 0 | 0 | 0 | 0 | 1 | 0 | 0 | 0 | 0 | 0 | 0 | 0 | 0 |
| Otu01488 | 3 | 0 | 0 | 0 | 0 | 0 | 0 | 0 | 0 | 1 | 0 | 2 | 0 | 0 | 0 | 0 |
| Otu01489 | 5 | 0 | 0 | 0 | 0 | 1 | 0 | 0 | 1 | 0 | 3 | 0 | 0 | 0 | 0 | 0 |
| Otu01490 | 5 | 0 | 0 | 0 | 0 | 2 | 0 | 0 | 0 | 1 | 0 | 0 | 0 | 0 | 2 | 0 |
| Otu01491 | 4 | 0 | 0 | 0 | 0 | 0 | 0 | 3 | 0 | 0 | 1 | 0 | 0 | 0 | 0 | 0 |
| Otu01492 | 5 | 0 | 0 | 0 | 1 | 0 | 2 | 0 | 0 | 1 | 0 | 1 | 0 | 0 | 0 | 0 |
| Otu01494 | 4 | 0 | 0 | 0 | 0 | 1 | 0 | 0 | 1 | 1 | 0 | 1 | 0 | 0 | 0 | 0 |
| Otu01495 | 5 | 0 | 0 | 0 | 0 | 0 | 0 | 3 | 0 | 0 | 2 | 0 | 0 | 0 | 0 | 0 |
| Otu01496 | 4 | 0 | 0 | 0 | 0 | 0 | 1 | 0 | 0 | 1 | 2 | 0 | 0 | 0 | 0 | 0 |
| Otu01497 | 3 | 0 | 0 | 0 | 0 | 0 | 1 | 0 | 0 | 1 | 0 | 0 | 0 | 1 | 0 | 0 |
| Otu01498 | 2 | 0 | 0 | 0 | 0 | 1 | 0 | 0 | 0 | 0 | 1 | 0 | 0 | 0 | 0 | 0 |
| Otu01499 | 3 | 0 | 0 | 0 | 0 | 0 | 0 | 1 | 0 | 1 | 0 | 1 | 0 | 0 | 0 | 0 |
| Otu01501 | 4 | 0 | 0 | 0 | 0 | 4 | 0 | 0 | 0 | 0 | 0 | 0 | 0 | 0 | 0 | 0 |
| Otu01502 | 3 | 0 | 0 | 0 | 0 | 0 | 0 | 0 | 3 | 0 | 0 | 0 | 0 | 0 | 0 | 0 |
| Otu01503 | 1 | 0 | 0 | 0 | 0 | 0 | 0 | 0 | 0 | 0 | 0 | 1 | 0 | 0 | 0 | 0 |
| Otu01504 | 3 | 0 | 0 | 0 | 3 | 0 | 0 | 0 | 0 | 0 | 0 | 0 | 0 | 0 | 0 | 0 |
| Otu01505 | 5 | 0 | 0 | 0 | 0 | 0 | 0 | 0 | 0 | 2 | 3 | 0 | 0 | 0 | 0 | 0 |
| Otu01506 | 3 | 0 | 0 | 0 | 0 | 0 | 0 | 0 | 1 | 1 | 0 | 1 | 0 | 0 | 0 | 0 |
| Otu01507 | 2 | 0 | 0 | 0 | 0 | 0 | 2 | 0 | 0 | 0 | 0 | 0 | 0 | 0 | 0 | 0 |
| Otu01508 | 2 | 0 | 0 | 0 | 0 | 0 | 0 | 0 | 0 | 1 | 0 | 0 | 1 | 0 | 0 | 0 |
| Otu01509 | 4 | 0 | 0 | 0 | 0 | 0 | 0 | 0 | 1 | 2 | 1 | 0 | 0 | 0 | 0 | 0 |
| Otu01510 | 3 | 0 | 0 | 0 | 0 | 0 | 0 | 0 | 0 | 0 | 0 | 3 | 0 | 0 | 0 | 0 |
| Otu01511 | 4 | 0 | 0 | 0 | 0 | 0 | 0 | 0 | 4 | 0 | 0 | 0 | 0 | 0 | 0 | 0 |
| Otu01512 | 0 | 0 | 0 | 0 | 0 | 0 | 0 | 0 | 0 | 0 | 0 | 0 | 0 | 0 | 0 | 0 |
| Otu01514 | 4 | 0 | 0 | 0 | 0 | 3 | 1 | 0 | 0 | 0 | 0 | 0 | 0 | 0 | 0 | 0 |
| Otu01515 | 2 | 0 | 0 | 0 | 0 | 0 | 0 | 0 | 1 | 1 | 0 | 0 | 0 | 0 | 0 | 0 |
| Otu01516 | 1 | 0 | 0 | 1 | 0 | 0 | 0 | 0 | 0 | 0 | 0 | 0 | 0 | 0 | 0 | 0 |
| Otu01518 | 2 | 0 | 2 | 0 | 0 | 0 | 0 | 0 | 0 | 0 | 0 | 0 | 0 | 0 | 0 | 0 |
| Otu01519 | 1 | 0 | 0 | 1 | 0 | 0 | 0 | 0 | 0 | 0 | 0 | 0 | 0 | 0 | 0 | 0 |
| Otu01520 | 3 | 0 | 0 | 0 | 0 | 0 | 0 | 0 | 0 | 0 | 0 | 3 | 0 | 0 | 0 | 0 |
| Otu01521 | 3 | 0 | 0 | 0 | 0 | 3 | 0 | 0 | 0 | 0 | 0 | 0 | 0 | 0 | 0 | 0 |
| Otu01522 | 1 | 0 | 0 | 0 | 0 | 0 | 0 | 0 | 1 | 0 | 0 | 0 | 0 | 0 | 0 | 0 |
| Otu01523 | 1 | 0 | 0 | 0 | 1 | 0 | 0 | 0 | 0 | 0 | 0 | 0 | 0 | 0 | 0 | 0 |
| Otu01524 | 3 | 0 | 0 | 0 | 0 | 1 | 2 | 0 | 0 | 0 | 0 | 0 | 0 | 0 | 0 | 0 |
| Otu01525 | 3 | 0 | 0 | 3 | 0 | 0 | 0 | 0 | 0 | 0 | 0 | 0 | 0 | 0 | 0 | 0 |
| Otu01526 | 2 | 0 | 0 | 2 | 0 | 0 | 0 | 0 | 0 | 0 | 0 | 0 | 0 | 0 | 0 | 0 |
| Otu01527 | 0 | 0 | 0 | 0 | 0 | 0 | 0 | 0 | 0 | 0 | 0 | 0 | 0 | 0 | 0 | 0 |
| Otu01528 | 4 | 0 | 0 | 0 | 0 | 1 | 0 | 0 | 0 | 0 | 3 | 0 | 0 | 0 | 0 | 0 |
| Otu01529 | 2 | 0 | 0 | 0 | 0 | 0 | 2 | 0 | 0 | 0 | 0 | 0 | 0 | 0 | 0 | 0 |
| Otu01530 | 4 | 0 | 0 | 0 | 0 | 0 | 0 | 0 | 0 | 0 | 3 | 0 | 0 | 0 | 1 | 0 |

Supplementary 1  
 Taxonomy and Abundance of OTUs (see taxonomy of OTUs in Table S1A)  
 Normalized data, identification according to blast UNITEv7

|          |   |   |   |   |   |   |   |   |   |   |   |   |   |   |   |   |   |
|----------|---|---|---|---|---|---|---|---|---|---|---|---|---|---|---|---|---|
| Otu01531 | 3 | 0 | 0 | 0 | 2 | 1 | 0 | 0 | 0 | 0 | 0 | 0 | 0 | 0 | 0 | 0 | 0 |
| Otu01532 | 4 | 0 | 0 | 0 | 0 | 0 | 0 | 0 | 0 | 0 | 4 | 0 | 0 | 0 | 0 | 0 | 0 |
| Otu01533 | 4 | 0 | 0 | 0 | 0 | 0 | 1 | 3 | 0 | 0 | 0 | 0 | 0 | 0 | 0 | 0 | 0 |
| Otu01534 | 4 | 0 | 0 | 0 | 0 | 0 | 4 | 0 | 0 | 0 | 0 | 0 | 0 | 0 | 0 | 0 | 0 |
| Otu01535 | 4 | 0 | 0 | 0 | 0 | 0 | 0 | 0 | 3 | 1 | 0 | 0 | 0 | 0 | 0 | 0 | 0 |
| Otu01536 | 0 | 0 | 0 | 0 | 0 | 0 | 0 | 0 | 0 | 0 | 0 | 0 | 0 | 0 | 0 | 0 | 0 |
| Otu01537 | 2 | 0 | 0 | 0 | 0 | 0 | 1 | 0 | 0 | 0 | 0 | 1 | 0 | 0 | 0 | 0 | 0 |
| Otu01539 | 1 | 0 | 0 | 0 | 0 | 1 | 0 | 0 | 0 | 0 | 0 | 0 | 0 | 0 | 0 | 0 | 0 |
| Otu01541 | 2 | 0 | 0 | 0 | 0 | 0 | 0 | 1 | 0 | 0 | 0 | 0 | 0 | 0 | 0 | 1 | 0 |
| Otu01542 | 3 | 0 | 0 | 1 | 0 | 0 | 0 | 1 | 0 | 1 | 0 | 0 | 0 | 0 | 0 | 0 | 0 |
| Otu01543 | 2 | 0 | 0 | 0 | 0 | 1 | 0 | 0 | 0 | 0 | 1 | 0 | 0 | 0 | 0 | 0 | 0 |
| Otu01544 | 3 | 0 | 0 | 0 | 0 | 0 | 0 | 1 | 1 | 0 | 1 | 0 | 0 | 0 | 0 | 0 | 0 |
| Otu01545 | 1 | 0 | 0 | 0 | 0 | 0 | 0 | 0 | 1 | 0 | 0 | 0 | 0 | 0 | 0 | 0 | 0 |
| Otu01546 | 0 | 0 | 0 | 0 | 0 | 0 | 0 | 0 | 0 | 0 | 0 | 0 | 0 | 0 | 0 | 0 | 0 |
| Otu01547 | 4 | 0 | 0 | 0 | 0 | 0 | 0 | 0 | 0 | 1 | 0 | 3 | 0 | 0 | 0 | 0 | 0 |
| Otu01548 | 1 | 0 | 1 | 0 | 0 | 0 | 0 | 0 | 0 | 0 | 0 | 0 | 0 | 0 | 0 | 0 | 0 |
| Otu01549 | 2 | 0 | 2 | 0 | 0 | 0 | 0 | 0 | 0 | 0 | 0 | 0 | 0 | 0 | 0 | 0 | 0 |
| Otu01550 | 1 | 0 | 0 | 0 | 0 | 0 | 0 | 0 | 0 | 0 | 1 | 0 | 0 | 0 | 0 | 0 | 0 |
| Otu01551 | 2 | 0 | 0 | 0 | 0 | 0 | 1 | 0 | 0 | 0 | 0 | 0 | 0 | 1 | 0 | 0 | 0 |
| Otu01552 | 0 | 0 | 0 | 0 | 0 | 0 | 0 | 0 | 0 | 0 | 0 | 0 | 0 | 0 | 0 | 0 | 0 |
| Otu01553 | 1 | 0 | 0 | 1 | 0 | 0 | 0 | 0 | 0 | 0 | 0 | 0 | 0 | 0 | 0 | 0 | 0 |
| Otu01554 | 4 | 0 | 0 | 0 | 0 | 0 | 0 | 0 | 0 | 0 | 4 | 0 | 0 | 0 | 0 | 0 | 0 |
| Otu01555 | 3 | 0 | 0 | 0 | 0 | 0 | 0 | 0 | 0 | 0 | 2 | 1 | 0 | 0 | 0 | 0 | 0 |
| Otu01556 | 2 | 0 | 0 | 0 | 0 | 0 | 0 | 1 | 0 | 0 | 0 | 0 | 0 | 0 | 0 | 0 | 1 |
| Otu01557 | 4 | 0 | 0 | 0 | 0 | 0 | 0 | 0 | 4 | 0 | 0 | 0 | 0 | 0 | 0 | 0 | 0 |
| Otu01558 | 3 | 0 | 0 | 0 | 0 | 0 | 0 | 0 | 0 | 0 | 0 | 3 | 0 | 0 | 0 | 0 | 0 |
| Otu01559 | 2 | 0 | 0 | 0 | 0 | 0 | 0 | 0 | 0 | 0 | 0 | 0 | 0 | 2 | 0 | 0 | 0 |
| Otu01560 | 1 | 0 | 0 | 0 | 1 | 0 | 0 | 0 | 0 | 0 | 0 | 0 | 0 | 0 | 0 | 0 | 0 |
| Otu01561 | 4 | 0 | 0 | 0 | 0 | 0 | 0 | 0 | 0 | 0 | 0 | 4 | 0 | 0 | 0 | 0 | 0 |
| Otu01562 | 1 | 1 | 0 | 0 | 0 | 0 | 0 | 0 | 0 | 0 | 0 | 0 | 0 | 0 | 0 | 0 | 0 |
| Otu01563 | 4 | 0 | 0 | 0 | 0 | 1 | 3 | 0 | 0 | 0 | 0 | 0 | 0 | 0 | 0 | 0 | 0 |
| Otu01564 | 2 | 0 | 0 | 0 | 0 | 1 | 0 | 1 | 0 | 0 | 0 | 0 | 0 | 0 | 0 | 0 | 0 |
| Otu01565 | 3 | 0 | 0 | 0 | 0 | 0 | 0 | 0 | 0 | 2 | 1 | 0 | 0 | 0 | 0 | 0 | 0 |
| Otu01566 | 4 | 0 | 0 | 0 | 0 | 0 | 0 | 0 | 4 | 0 | 0 | 0 | 0 | 0 | 0 | 0 | 0 |
| Otu01567 | 2 | 0 | 0 | 0 | 2 | 0 | 0 | 0 | 0 | 0 | 0 | 0 | 0 | 0 | 0 | 0 | 0 |
| Otu01568 | 2 | 0 | 0 | 0 | 0 | 0 | 0 | 1 | 1 | 0 | 0 | 0 | 0 | 0 | 0 | 0 | 0 |
| Otu01570 | 4 | 0 | 2 | 1 | 1 | 0 | 0 | 0 | 0 | 0 | 0 | 0 | 0 | 0 | 0 | 0 | 0 |
| Otu01571 | 3 | 0 | 0 | 0 | 0 | 0 | 0 | 0 | 0 | 1 | 2 | 0 | 0 | 0 | 0 | 0 | 0 |
| Otu01572 | 2 | 0 | 0 | 1 | 0 | 1 | 0 | 0 | 0 | 0 | 0 | 0 | 0 | 0 | 0 | 0 | 0 |
| Otu01573 | 1 | 0 | 0 | 1 | 0 | 0 | 0 | 0 | 0 | 0 | 0 | 0 | 0 | 0 | 0 | 0 | 0 |
| Otu01574 | 0 | 0 | 0 | 0 | 0 | 0 | 0 | 0 | 0 | 0 | 0 | 0 | 0 | 0 | 0 | 0 | 0 |
| Otu01575 | 3 | 1 | 0 | 0 | 0 | 0 | 0 | 0 | 0 | 1 | 1 | 0 | 0 | 0 | 0 | 0 | 0 |
| Otu01576 | 1 | 0 | 0 | 0 | 0 | 0 | 0 | 0 | 0 | 0 | 0 | 0 | 0 | 0 | 0 | 1 | 0 |

Supplementary 1  
 Taxonomy and Abundance of OTUs (see taxonomy of OTUs in Table S1A)  
 Normalized data, identification according to blast UNITEv7

|          |   |   |   |   |   |   |   |   |   |   |   |   |   |   |   |   |
|----------|---|---|---|---|---|---|---|---|---|---|---|---|---|---|---|---|
| Otu01577 | 2 | 0 | 0 | 0 | 0 | 0 | 1 | 0 | 0 | 0 | 0 | 0 | 0 | 0 | 0 | 1 |
| Otu01578 | 4 | 0 | 0 | 0 | 0 | 0 | 0 | 3 | 0 | 1 | 0 | 0 | 0 | 0 | 0 | 0 |
| Otu01579 | 4 | 0 | 0 | 0 | 0 | 0 | 0 | 0 | 0 | 2 | 2 | 0 | 0 | 0 | 0 | 0 |
| Otu01580 | 4 | 0 | 0 | 0 | 0 | 0 | 0 | 0 | 0 | 0 | 4 | 0 | 0 | 0 | 0 | 0 |
| Otu01581 | 4 | 0 | 0 | 0 | 0 | 0 | 0 | 4 | 0 | 0 | 0 | 0 | 0 | 0 | 0 | 0 |
| Otu01582 | 1 | 0 | 0 | 0 | 0 | 0 | 0 | 0 | 0 | 0 | 0 | 1 | 0 | 0 | 0 | 0 |
| Otu01583 | 1 | 0 | 0 | 1 | 0 | 0 | 0 | 0 | 0 | 0 | 0 | 0 | 0 | 0 | 0 | 0 |
| Otu01584 | 3 | 0 | 1 | 0 | 0 | 0 | 0 | 0 | 2 | 0 | 0 | 0 | 0 | 0 | 0 | 0 |
| Otu01585 | 4 | 0 | 0 | 0 | 0 | 0 | 0 | 1 | 2 | 1 | 0 | 0 | 0 | 0 | 0 | 0 |
| Otu01586 | 2 | 1 | 1 | 0 | 0 | 0 | 0 | 0 | 0 | 0 | 0 | 0 | 0 | 0 | 0 | 0 |
| Otu01587 | 3 | 0 | 0 | 1 | 0 | 0 | 0 | 0 | 0 | 0 | 0 | 0 | 0 | 0 | 2 | 0 |
| Otu01588 | 4 | 0 | 0 | 0 | 0 | 0 | 0 | 0 | 2 | 1 | 1 | 0 | 0 | 0 | 0 | 0 |
| Otu01589 | 1 | 0 | 0 | 0 | 0 | 0 | 0 | 0 | 1 | 0 | 0 | 0 | 0 | 0 | 0 | 0 |
| Otu01590 | 2 | 0 | 2 | 0 | 0 | 0 | 0 | 0 | 0 | 0 | 0 | 0 | 0 | 0 | 0 | 0 |
| Otu01591 | 4 | 0 | 0 | 0 | 0 | 0 | 2 | 1 | 0 | 0 | 0 | 1 | 0 | 0 | 0 | 0 |
| Otu01592 | 2 | 0 | 0 | 1 | 1 | 0 | 0 | 0 | 0 | 0 | 0 | 0 | 0 | 0 | 0 | 0 |
| Otu01593 | 4 | 0 | 0 | 0 | 0 | 0 | 0 | 0 | 0 | 2 | 2 | 0 | 0 | 0 | 0 | 0 |
| Otu01594 | 1 | 0 | 0 | 0 | 0 | 0 | 0 | 0 | 0 | 0 | 0 | 0 | 0 | 1 | 0 | 0 |
| Otu01595 | 1 | 0 | 0 | 1 | 0 | 0 | 0 | 0 | 0 | 0 | 0 | 0 | 0 | 0 | 0 | 0 |
| Otu01596 | 3 | 0 | 0 | 0 | 0 | 0 | 1 | 0 | 1 | 0 | 1 | 0 | 0 | 0 | 0 | 0 |
| Otu01597 | 0 | 0 | 0 | 0 | 0 | 0 | 0 | 0 | 0 | 0 | 0 | 0 | 0 | 0 | 0 | 0 |
| Otu01598 | 2 | 0 | 0 | 2 | 0 | 0 | 0 | 0 | 0 | 0 | 0 | 0 | 0 | 0 | 0 | 0 |
| Otu01600 | 4 | 0 | 0 | 0 | 0 | 0 | 0 | 4 | 0 | 0 | 0 | 0 | 0 | 0 | 0 | 0 |
| Otu01601 | 3 | 0 | 0 | 0 | 0 | 0 | 0 | 1 | 0 | 2 | 0 | 0 | 0 | 0 | 0 | 0 |
| Otu01602 | 4 | 0 | 0 | 0 | 0 | 0 | 0 | 0 | 2 | 1 | 1 | 0 | 0 | 0 | 0 | 0 |
| Otu01603 | 4 | 0 | 0 | 0 | 0 | 0 | 0 | 0 | 0 | 4 | 0 | 0 | 0 | 0 | 0 | 0 |
| Otu01604 | 3 | 0 | 0 | 0 | 0 | 0 | 0 | 1 | 0 | 1 | 1 | 0 | 0 | 0 | 0 | 0 |
| Otu01605 | 2 | 1 | 0 | 1 | 0 | 0 | 0 | 0 | 0 | 0 | 0 | 0 | 0 | 0 | 0 | 0 |
| Otu01606 | 3 | 0 | 3 | 0 | 0 | 0 | 0 | 0 | 0 | 0 | 0 | 0 | 0 | 0 | 0 | 0 |
| Otu01607 | 3 | 0 | 0 | 0 | 0 | 0 | 0 | 3 | 0 | 0 | 0 | 0 | 0 | 0 | 0 | 0 |
| Otu01608 | 2 | 0 | 0 | 0 | 0 | 2 | 0 | 0 | 0 | 0 | 0 | 0 | 0 | 0 | 0 | 0 |
| Otu01609 | 1 | 0 | 1 | 0 | 0 | 0 | 0 | 0 | 0 | 0 | 0 | 0 | 0 | 0 | 0 | 0 |
| Otu01610 | 0 | 0 | 0 | 0 | 0 | 0 | 0 | 0 | 0 | 0 | 0 | 0 | 0 | 0 | 0 | 0 |
| Otu01611 | 4 | 0 | 0 | 0 | 0 | 0 | 0 | 0 | 0 | 3 | 0 | 0 | 0 | 0 | 1 | 0 |
| Otu01612 | 4 | 0 | 0 | 0 | 0 | 0 | 4 | 0 | 0 | 0 | 0 | 0 | 0 | 0 | 0 | 0 |
| Otu01613 | 1 | 1 | 0 | 0 | 0 | 0 | 0 | 0 | 0 | 0 | 0 | 0 | 0 | 0 | 0 | 0 |
| Otu01614 | 3 | 0 | 0 | 1 | 0 | 2 | 0 | 0 | 0 | 0 | 0 | 0 | 0 | 0 | 0 | 0 |
| Otu01615 | 2 | 0 | 0 | 0 | 0 | 0 | 0 | 0 | 0 | 0 | 0 | 2 | 0 | 0 | 0 | 0 |
| Otu01616 | 2 | 0 | 0 | 0 | 0 | 0 | 2 | 0 | 0 | 0 | 0 | 0 | 0 | 0 | 0 | 0 |
| Otu01617 | 4 | 0 | 0 | 0 | 0 | 0 | 1 | 0 | 0 | 0 | 1 | 0 | 0 | 0 | 2 | 0 |
| Otu01618 | 4 | 0 | 0 | 0 | 0 | 0 | 0 | 0 | 0 | 0 | 3 | 0 | 0 | 0 | 1 | 0 |
| Otu01619 | 2 | 0 | 0 | 0 | 0 | 1 | 0 | 0 | 1 | 0 | 0 | 0 | 0 | 0 | 0 | 0 |
| Otu01620 | 1 | 0 | 0 | 0 | 0 | 0 | 0 | 0 | 0 | 0 | 0 | 0 | 0 | 0 | 1 | 0 |

Supplementary 1  
 Taxonomy and Abundance of OTUs (see taxonomy of OTUs in Table S1A)  
 Normalized data, identification according to blast UNITEv7

|          |   |   |   |   |   |   |   |   |   |   |   |   |   |   |   |   |   |
|----------|---|---|---|---|---|---|---|---|---|---|---|---|---|---|---|---|---|
| Otu01621 | 1 | 1 | 0 | 0 | 0 | 0 | 0 | 0 | 0 | 0 | 0 | 0 | 0 | 0 | 0 | 0 | 0 |
| Otu01622 | 1 | 0 | 0 | 0 | 0 | 1 | 0 | 0 | 0 | 0 | 0 | 0 | 0 | 0 | 0 | 0 | 0 |
| Otu01623 | 1 | 0 | 0 | 0 | 0 | 0 | 0 | 0 | 0 | 0 | 0 | 1 | 0 | 0 | 0 | 0 | 0 |
| Otu01624 | 3 | 0 | 0 | 0 | 0 | 0 | 0 | 0 | 0 | 2 | 1 | 0 | 0 | 0 | 0 | 0 | 0 |
| Otu01626 | 3 | 0 | 0 | 0 | 0 | 0 | 0 | 0 | 0 | 0 | 0 | 3 | 0 | 0 | 0 | 0 | 0 |
| Otu01627 | 2 | 0 | 0 | 0 | 0 | 1 | 0 | 0 | 0 | 1 | 0 | 0 | 0 | 0 | 0 | 0 | 0 |
| Otu01628 | 2 | 0 | 0 | 0 | 0 | 0 | 0 | 0 | 1 | 0 | 0 | 1 | 0 | 0 | 0 | 0 | 0 |
| Otu01629 | 4 | 0 | 0 | 0 | 0 | 0 | 0 | 0 | 0 | 4 | 0 | 0 | 0 | 0 | 0 | 0 | 0 |
| Otu01630 | 4 | 0 | 0 | 0 | 0 | 0 | 0 | 1 | 0 | 2 | 1 | 0 | 0 | 0 | 0 | 0 | 0 |
| Otu01631 | 3 | 0 | 0 | 0 | 0 | 0 | 0 | 0 | 0 | 0 | 2 | 1 | 0 | 0 | 0 | 0 | 0 |
| Otu01632 | 4 | 0 | 0 | 0 | 0 | 0 | 0 | 4 | 0 | 0 | 0 | 0 | 0 | 0 | 0 | 0 | 0 |
| Otu01633 | 2 | 0 | 0 | 0 | 2 | 0 | 0 | 0 | 0 | 0 | 0 | 0 | 0 | 0 | 0 | 0 | 0 |
| Otu01634 | 4 | 0 | 0 | 0 | 0 | 0 | 1 | 1 | 0 | 2 | 0 | 0 | 0 | 0 | 0 | 0 | 0 |
| Otu01636 | 3 | 0 | 0 | 0 | 0 | 0 | 0 | 0 | 0 | 1 | 0 | 1 | 0 | 0 | 0 | 0 | 1 |
| Otu01637 | 2 | 0 | 0 | 2 | 0 | 0 | 0 | 0 | 0 | 0 | 0 | 0 | 0 | 0 | 0 | 0 | 0 |
| Otu01639 | 2 | 0 | 0 | 0 | 0 | 2 | 0 | 0 | 0 | 0 | 0 | 0 | 0 | 0 | 0 | 0 | 0 |
| Otu01640 | 3 | 0 | 0 | 2 | 1 | 0 | 0 | 0 | 0 | 0 | 0 | 0 | 0 | 0 | 0 | 0 | 0 |
| Otu01641 | 0 | 0 | 0 | 0 | 0 | 0 | 0 | 0 | 0 | 0 | 0 | 0 | 0 | 0 | 0 | 0 | 0 |
| Otu01642 | 2 | 0 | 1 | 1 | 0 | 0 | 0 | 0 | 0 | 0 | 0 | 0 | 0 | 0 | 0 | 0 | 0 |
| Otu01643 | 1 | 0 | 0 | 0 | 1 | 0 | 0 | 0 | 0 | 0 | 0 | 0 | 0 | 0 | 0 | 0 | 0 |
| Otu01644 | 3 | 0 | 0 | 1 | 0 | 0 | 0 | 0 | 1 | 0 | 0 | 0 | 0 | 0 | 0 | 1 | 0 |
| Otu01645 | 1 | 0 | 0 | 0 | 1 | 0 | 0 | 0 | 0 | 0 | 0 | 0 | 0 | 0 | 0 | 0 | 0 |
| Otu01646 | 3 | 0 | 0 | 0 | 3 | 0 | 0 | 0 | 0 | 0 | 0 | 0 | 0 | 0 | 0 | 0 | 0 |
| Otu01648 | 3 | 0 | 0 | 0 | 0 | 0 | 0 | 0 | 2 | 0 | 0 | 0 | 0 | 0 | 0 | 1 | 0 |
| Otu01649 | 2 | 0 | 0 | 0 | 0 | 0 | 0 | 0 | 2 | 0 | 0 | 0 | 0 | 0 | 0 | 0 | 0 |
| Otu01650 | 2 | 0 | 0 | 0 | 0 | 0 | 0 | 1 | 1 | 0 | 0 | 0 | 0 | 0 | 0 | 0 | 0 |
| Otu01651 | 2 | 0 | 0 | 2 | 0 | 0 | 0 | 0 | 0 | 0 | 0 | 0 | 0 | 0 | 0 | 0 | 0 |
| Otu01652 | 3 | 0 | 0 | 1 | 1 | 0 | 0 | 1 | 0 | 0 | 0 | 0 | 0 | 0 | 0 | 0 | 0 |
| Otu01653 | 1 | 0 | 0 | 0 | 0 | 0 | 1 | 0 | 0 | 0 | 0 | 0 | 0 | 0 | 0 | 0 | 0 |
| Otu01654 | 0 | 0 | 0 | 0 | 0 | 0 | 0 | 0 | 0 | 0 | 0 | 0 | 0 | 0 | 0 | 0 | 0 |
| Otu01655 | 4 | 0 | 0 | 0 | 0 | 0 | 3 | 1 | 0 | 0 | 0 | 0 | 0 | 0 | 0 | 0 | 0 |
| Otu01656 | 2 | 0 | 0 | 0 | 2 | 0 | 0 | 0 | 0 | 0 | 0 | 0 | 0 | 0 | 0 | 0 | 0 |
| Otu01657 | 2 | 2 | 0 | 0 | 0 | 0 | 0 | 0 | 0 | 0 | 0 | 0 | 0 | 0 | 0 | 0 | 0 |
| Otu01658 | 2 | 0 | 0 | 0 | 1 | 0 | 1 | 0 | 0 | 0 | 0 | 0 | 0 | 0 | 0 | 0 | 0 |
| Otu01659 | 2 | 0 | 0 | 0 | 0 | 0 | 0 | 0 | 0 | 0 | 0 | 2 | 0 | 0 | 0 | 0 | 0 |
| Otu01660 | 3 | 0 | 0 | 0 | 0 | 3 | 0 | 0 | 0 | 0 | 0 | 0 | 0 | 0 | 0 | 0 | 0 |
| Otu01661 | 4 | 0 | 0 | 0 | 0 | 0 | 0 | 0 | 0 | 0 | 4 | 0 | 0 | 0 | 0 | 0 | 0 |
| Otu01662 | 3 | 0 | 0 | 0 | 0 | 0 | 2 | 1 | 0 | 0 | 0 | 0 | 0 | 0 | 0 | 0 | 0 |
| Otu01663 | 1 | 0 | 0 | 0 | 0 | 0 | 0 | 0 | 1 | 0 | 0 | 0 | 0 | 0 | 0 | 0 | 0 |
| Otu01665 | 3 | 0 | 0 | 0 | 0 | 0 | 0 | 0 | 1 | 0 | 2 | 0 | 0 | 0 | 0 | 0 | 0 |
| Otu01666 | 1 | 0 | 0 | 0 | 0 | 1 | 0 | 0 | 0 | 0 | 0 | 0 | 0 | 0 | 0 | 0 | 0 |
| Otu01667 | 4 | 0 | 0 | 0 | 0 | 1 | 0 | 0 | 1 | 1 | 1 | 0 | 0 | 0 | 0 | 0 | 0 |
| Otu01669 | 1 | 0 | 0 | 0 | 1 | 0 | 0 | 0 | 0 | 0 | 0 | 0 | 0 | 0 | 0 | 0 | 0 |

Supplementary 1  
 Taxonomy and Abundance of OTUs (see taxonomy of OTUs in Table S1A)  
 Normalized data, identification according to blast UNITEv7

|          |   |   |   |   |   |   |   |   |   |   |   |   |   |   |   |   |
|----------|---|---|---|---|---|---|---|---|---|---|---|---|---|---|---|---|
| Otu01670 | 3 | 0 | 0 | 0 | 0 | 0 | 0 | 0 | 0 | 3 | 0 | 0 | 0 | 0 | 0 | 0 |
| Otu01671 | 4 | 0 | 0 | 0 | 0 | 0 | 0 | 4 | 0 | 0 | 0 | 0 | 0 | 0 | 0 | 0 |
| Otu01672 | 0 | 0 | 0 | 0 | 0 | 0 | 0 | 0 | 0 | 0 | 0 | 0 | 0 | 0 | 0 | 0 |
| Otu01673 | 1 | 0 | 1 | 0 | 0 | 0 | 0 | 0 | 0 | 0 | 0 | 0 | 0 | 0 | 0 | 0 |
| Otu01674 | 2 | 0 | 0 | 0 | 2 | 0 | 0 | 0 | 0 | 0 | 0 | 0 | 0 | 0 | 0 | 0 |
| Otu01675 | 3 | 1 | 2 | 0 | 0 | 0 | 0 | 0 | 0 | 0 | 0 | 0 | 0 | 0 | 0 | 0 |
| Otu01676 | 2 | 1 | 0 | 1 | 0 | 0 | 0 | 0 | 0 | 0 | 0 | 0 | 0 | 0 | 0 | 0 |
| Otu01678 | 1 | 0 | 0 | 0 | 0 | 0 | 0 | 0 | 1 | 0 | 0 | 0 | 0 | 0 | 0 | 0 |
| Otu01679 | 4 | 0 | 0 | 0 | 0 | 0 | 0 | 3 | 1 | 0 | 0 | 0 | 0 | 0 | 0 | 0 |
| Otu01680 | 1 | 0 | 0 | 0 | 0 | 0 | 0 | 1 | 0 | 0 | 0 | 0 | 0 | 0 | 0 | 0 |
| Otu01681 | 4 | 0 | 0 | 0 | 0 | 0 | 1 | 0 | 1 | 1 | 0 | 0 | 0 | 0 | 1 | 0 |
| Otu01682 | 1 | 0 | 0 | 0 | 0 | 0 | 1 | 0 | 0 | 0 | 0 | 0 | 0 | 0 | 0 | 0 |
| Otu01683 | 4 | 0 | 0 | 0 | 0 | 2 | 1 | 0 | 0 | 1 | 0 | 0 | 0 | 0 | 0 | 0 |
| Otu01684 | 1 | 0 | 0 | 1 | 0 | 0 | 0 | 0 | 0 | 0 | 0 | 0 | 0 | 0 | 0 | 0 |
| Otu01686 | 4 | 0 | 0 | 0 | 0 | 0 | 0 | 0 | 0 | 0 | 4 | 0 | 0 | 0 | 0 | 0 |
| Otu01687 | 2 | 0 | 0 | 1 | 1 | 0 | 0 | 0 | 0 | 0 | 0 | 0 | 0 | 0 | 0 | 0 |
| Otu01688 | 3 | 0 | 0 | 1 | 0 | 0 | 0 | 0 | 1 | 0 | 1 | 0 | 0 | 0 | 0 | 0 |
| Otu01689 | 3 | 0 | 0 | 0 | 0 | 0 | 1 | 2 | 0 | 0 | 0 | 0 | 0 | 0 | 0 | 0 |
| Otu01690 | 1 | 0 | 0 | 0 | 0 | 0 | 1 | 0 | 0 | 0 | 0 | 0 | 0 | 0 | 0 | 0 |
| Otu01691 | 2 | 0 | 0 | 0 | 0 | 0 | 1 | 0 | 0 | 1 | 0 | 0 | 0 | 0 | 0 | 0 |
| Otu01692 | 2 | 0 | 0 | 1 | 0 | 0 | 0 | 0 | 0 | 0 | 0 | 0 | 1 | 0 | 0 | 0 |
| Otu01694 | 2 | 0 | 0 | 0 | 0 | 0 | 1 | 0 | 1 | 0 | 0 | 0 | 0 | 0 | 0 | 0 |
| Otu01695 | 2 | 0 | 0 | 0 | 0 | 0 | 0 | 0 | 0 | 0 | 0 | 2 | 0 | 0 | 0 | 0 |
| Otu01696 | 2 | 0 | 2 | 0 | 0 | 0 | 0 | 0 | 0 | 0 | 0 | 0 | 0 | 0 | 0 | 0 |
| Otu01697 | 1 | 0 | 0 | 1 | 0 | 0 | 0 | 0 | 0 | 0 | 0 | 0 | 0 | 0 | 0 | 0 |
| Otu01698 | 2 | 0 | 0 | 0 | 0 | 0 | 0 | 0 | 2 | 0 | 0 | 0 | 0 | 0 | 0 | 0 |
| Otu01699 | 3 | 0 | 0 | 0 | 0 | 1 | 0 | 1 | 1 | 0 | 0 | 0 | 0 | 0 | 0 | 0 |
| Otu01700 | 3 | 0 | 0 | 0 | 0 | 2 | 1 | 0 | 0 | 0 | 0 | 0 | 0 | 0 | 0 | 0 |
| Otu01701 | 3 | 0 | 0 | 0 | 0 | 0 | 0 | 1 | 0 | 2 | 0 | 0 | 0 | 0 | 0 | 0 |
| Otu01702 | 2 | 0 | 0 | 0 | 0 | 0 | 1 | 0 | 0 | 0 | 1 | 0 | 0 | 0 | 0 | 0 |
| Otu01703 | 1 | 0 | 0 | 0 | 0 | 1 | 0 | 0 | 0 | 0 | 0 | 0 | 0 | 0 | 0 | 0 |
| Otu01704 | 2 | 0 | 0 | 0 | 0 | 0 | 0 | 0 | 1 | 1 | 0 | 0 | 0 | 0 | 0 | 0 |
| Otu01705 | 3 | 0 | 0 | 0 | 0 | 0 | 3 | 0 | 0 | 0 | 0 | 0 | 0 | 0 | 0 | 0 |
| Otu01706 | 1 | 0 | 0 | 0 | 1 | 0 | 0 | 0 | 0 | 0 | 0 | 0 | 0 | 0 | 0 | 0 |
| Otu01707 | 1 | 0 | 0 | 0 | 1 | 0 | 0 | 0 | 0 | 0 | 0 | 0 | 0 | 0 | 0 | 0 |
| Otu01708 | 3 | 0 | 0 | 0 | 0 | 1 | 0 | 0 | 0 | 0 | 2 | 0 | 0 | 0 | 0 | 0 |
| Otu01709 | 1 | 0 | 0 | 0 | 0 | 0 | 0 | 1 | 0 | 0 | 0 | 0 | 0 | 0 | 0 | 0 |
| Otu01710 | 3 | 0 | 0 | 0 | 0 | 2 | 1 | 0 | 0 | 0 | 0 | 0 | 0 | 0 | 0 | 0 |
| Otu01711 | 1 | 0 | 1 | 0 | 0 | 0 | 0 | 0 | 0 | 0 | 0 | 0 | 0 | 0 | 0 | 0 |
| Otu01712 | 2 | 0 | 0 | 0 | 1 | 0 | 0 | 0 | 1 | 0 | 0 | 0 | 0 | 0 | 0 | 0 |
| Otu01713 | 3 | 0 | 0 | 0 | 0 | 0 | 0 | 0 | 0 | 3 | 0 | 0 | 0 | 0 | 0 | 0 |
| Otu01714 | 3 | 0 | 0 | 0 | 0 | 0 | 0 | 0 | 2 | 1 | 0 | 0 | 0 | 0 | 0 | 0 |
| Otu01715 | 1 | 0 | 0 | 0 | 0 | 0 | 0 | 0 | 0 | 0 | 1 | 0 | 0 | 0 | 0 | 0 |

Supplementary 1  
 Taxonomy and Abundance of OTUs (see taxonomy of OTUs in Table S1A)  
 Normalized data, identification according to blast UNITEv7

|          |   |   |   |   |   |   |   |   |   |   |   |   |   |   |   |   |
|----------|---|---|---|---|---|---|---|---|---|---|---|---|---|---|---|---|
| Otu01716 | 1 | 0 | 1 | 0 | 0 | 0 | 0 | 0 | 0 | 0 | 0 | 0 | 0 | 0 | 0 | 0 |
| Otu01717 | 1 | 0 | 1 | 0 | 0 | 0 | 0 | 0 | 0 | 0 | 0 | 0 | 0 | 0 | 0 | 0 |
| Otu01718 | 3 | 0 | 0 | 0 | 0 | 1 | 0 | 2 | 0 | 0 | 0 | 0 | 0 | 0 | 0 | 0 |
| Otu01719 | 2 | 0 | 0 | 0 | 0 | 1 | 1 | 0 | 0 | 0 | 0 | 0 | 0 | 0 | 0 | 0 |
| Otu01721 | 0 | 0 | 0 | 0 | 0 | 0 | 0 | 0 | 0 | 0 | 0 | 0 | 0 | 0 | 0 | 0 |
| Otu01722 | 1 | 0 | 1 | 0 | 0 | 0 | 0 | 0 | 0 | 0 | 0 | 0 | 0 | 0 | 0 | 0 |
| Otu01723 | 1 | 0 | 0 | 0 | 0 | 1 | 0 | 0 | 0 | 0 | 0 | 0 | 0 | 0 | 0 | 0 |
| Otu01725 | 1 | 0 | 1 | 0 | 0 | 0 | 0 | 0 | 0 | 0 | 0 | 0 | 0 | 0 | 0 | 0 |
| Otu01726 | 1 | 0 | 0 | 0 | 0 | 1 | 0 | 0 | 0 | 0 | 0 | 0 | 0 | 0 | 0 | 0 |
| Otu01727 | 3 | 0 | 0 | 0 | 0 | 0 | 0 | 0 | 0 | 0 | 0 | 0 | 0 | 1 | 2 | 0 |
| Otu01729 | 1 | 0 | 0 | 0 | 0 | 0 | 0 | 0 | 0 | 0 | 1 | 0 | 0 | 0 | 0 | 0 |
| Otu01730 | 2 | 0 | 0 | 0 | 0 | 1 | 1 | 0 | 0 | 0 | 0 | 0 | 0 | 0 | 0 | 0 |
| Otu01731 | 3 | 0 | 0 | 0 | 0 | 0 | 0 | 0 | 0 | 0 | 3 | 0 | 0 | 0 | 0 | 0 |
| Otu01732 | 2 | 0 | 0 | 0 | 0 | 0 | 2 | 0 | 0 | 0 | 0 | 0 | 0 | 0 | 0 | 0 |
| Otu01733 | 1 | 0 | 0 | 0 | 0 | 0 | 0 | 0 | 0 | 1 | 0 | 0 | 0 | 0 | 0 | 0 |
| Otu01735 | 3 | 0 | 0 | 0 | 0 | 0 | 0 | 0 | 0 | 2 | 0 | 1 | 0 | 0 | 0 | 0 |
| Otu01737 | 2 | 0 | 0 | 0 | 0 | 0 | 0 | 0 | 2 | 0 | 0 | 0 | 0 | 0 | 0 | 0 |
| Otu01738 | 3 | 0 | 0 | 0 | 0 | 0 | 0 | 0 | 1 | 0 | 0 | 2 | 0 | 0 | 0 | 0 |
| Otu01739 | 2 | 0 | 0 | 0 | 0 | 0 | 1 | 0 | 0 | 0 | 0 | 1 | 0 | 0 | 0 | 0 |
| Otu01740 | 2 | 0 | 0 | 0 | 0 | 0 | 1 | 0 | 0 | 1 | 0 | 0 | 0 | 0 | 0 | 0 |
| Otu01741 | 3 | 0 | 2 | 0 | 0 | 0 | 0 | 0 | 1 | 0 | 0 | 0 | 0 | 0 | 0 | 0 |
| Otu01742 | 2 | 0 | 0 | 0 | 0 | 0 | 1 | 0 | 1 | 0 | 0 | 0 | 0 | 0 | 0 | 0 |
| Otu01743 | 2 | 0 | 0 | 0 | 0 | 0 | 0 | 0 | 1 | 1 | 0 | 0 | 0 | 0 | 0 | 0 |
| Otu01746 | 0 | 0 | 0 | 0 | 0 | 0 | 0 | 0 | 0 | 0 | 0 | 0 | 0 | 0 | 0 | 0 |
| Otu01747 | 2 | 0 | 0 | 0 | 0 | 0 | 0 | 0 | 2 | 0 | 0 | 0 | 0 | 0 | 0 | 0 |
| Otu01748 | 2 | 0 | 0 | 0 | 0 | 0 | 0 | 0 | 0 | 1 | 1 | 0 | 0 | 0 | 0 | 0 |
| Otu01749 | 2 | 0 | 0 | 0 | 0 | 0 | 0 | 2 | 0 | 0 | 0 | 0 | 0 | 0 | 0 | 0 |
| Otu01750 | 1 | 0 | 0 | 0 | 0 | 0 | 0 | 0 | 0 | 0 | 0 | 0 | 1 | 0 | 0 | 0 |
| Otu01751 | 3 | 0 | 0 | 0 | 0 | 0 | 0 | 0 | 3 | 0 | 0 | 0 | 0 | 0 | 0 | 0 |
| Otu01752 | 1 | 0 | 0 | 0 | 0 | 0 | 0 | 1 | 0 | 0 | 0 | 0 | 0 | 0 | 0 | 0 |
| Otu01756 | 3 | 0 | 0 | 0 | 0 | 0 | 3 | 0 | 0 | 0 | 0 | 0 | 0 | 0 | 0 | 0 |
| Otu01757 | 3 | 0 | 0 | 0 | 0 | 0 | 0 | 0 | 3 | 0 | 0 | 0 | 0 | 0 | 0 | 0 |
| Otu01758 | 3 | 0 | 0 | 0 | 0 | 0 | 0 | 0 | 1 | 2 | 0 | 0 | 0 | 0 | 0 | 0 |
| Otu01759 | 1 | 0 | 0 | 0 | 0 | 0 | 0 | 0 | 0 | 1 | 0 | 0 | 0 | 0 | 0 | 0 |
| Otu01760 | 1 | 0 | 0 | 1 | 0 | 0 | 0 | 0 | 0 | 0 | 0 | 0 | 0 | 0 | 0 | 0 |
| Otu01762 | 3 | 0 | 0 | 0 | 0 | 0 | 0 | 0 | 0 | 0 | 1 | 2 | 0 | 0 | 0 | 0 |
| Otu01765 | 1 | 0 | 1 | 0 | 0 | 0 | 0 | 0 | 0 | 0 | 0 | 0 | 0 | 0 | 0 | 0 |
| Otu01766 | 3 | 0 | 0 | 0 | 0 | 0 | 0 | 0 | 0 | 0 | 1 | 0 | 0 | 0 | 2 | 0 |
| Otu01767 | 2 | 0 | 0 | 2 | 0 | 0 | 0 | 0 | 0 | 0 | 0 | 0 | 0 | 0 | 0 | 0 |
| Otu01768 | 2 | 0 | 0 | 0 | 0 | 0 | 0 | 0 | 0 | 0 | 0 | 0 | 0 | 0 | 2 | 0 |
| Otu01769 | 1 | 0 | 0 | 1 | 0 | 0 | 0 | 0 | 0 | 0 | 0 | 0 | 0 | 0 | 0 | 0 |
| Otu01771 | 3 | 0 | 0 | 0 | 1 | 0 | 0 | 1 | 0 | 0 | 1 | 0 | 0 | 0 | 0 | 0 |
| Otu01773 | 1 | 0 | 0 | 0 | 0 | 0 | 0 | 0 | 1 | 0 | 0 | 0 | 0 | 0 | 0 | 0 |

Supplementary 1  
 Taxonomy and Abundance of OTUs (see taxonomy of OTUs in Table S1A)  
 Normalized data, identification according to blast UNITEv7

|          |   |   |   |   |   |   |   |   |   |   |   |   |   |   |   |   |
|----------|---|---|---|---|---|---|---|---|---|---|---|---|---|---|---|---|
| Otu01775 | 1 | 0 | 0 | 0 | 0 | 1 | 0 | 0 | 0 | 0 | 0 | 0 | 0 | 0 | 0 | 0 |
| Otu01776 | 2 | 0 | 0 | 0 | 0 | 0 | 2 | 0 | 0 | 0 | 0 | 0 | 0 | 0 | 0 | 0 |
| Otu01777 | 2 | 0 | 0 | 0 | 0 | 0 | 0 | 0 | 0 | 1 | 1 | 0 | 0 | 0 | 0 | 0 |
| Otu01778 | 3 | 0 | 0 | 0 | 0 | 0 | 3 | 0 | 0 | 0 | 0 | 0 | 0 | 0 | 0 | 0 |
| Otu01779 | 2 | 0 | 0 | 0 | 0 | 0 | 0 | 0 | 0 | 0 | 1 | 1 | 0 | 0 | 0 | 0 |
| Otu01781 | 2 | 0 | 1 | 0 | 1 | 0 | 0 | 0 | 0 | 0 | 0 | 0 | 0 | 0 | 0 | 0 |
| Otu01782 | 3 | 0 | 0 | 0 | 0 | 0 | 2 | 1 | 0 | 0 | 0 | 0 | 0 | 0 | 0 | 0 |
| Otu01784 | 3 | 0 | 0 | 0 | 0 | 0 | 3 | 0 | 0 | 0 | 0 | 0 | 0 | 0 | 0 | 0 |
| Otu01785 | 2 | 0 | 0 | 0 | 0 | 0 | 0 | 1 | 0 | 0 | 0 | 0 | 0 | 1 | 0 | 0 |
| Otu01786 | 1 | 1 | 0 | 0 | 0 | 0 | 0 | 0 | 0 | 0 | 0 | 0 | 0 | 0 | 0 | 0 |
| Otu01787 | 2 | 0 | 0 | 0 | 0 | 0 | 1 | 0 | 0 | 1 | 0 | 0 | 0 | 0 | 0 | 0 |
| Otu01788 | 3 | 0 | 0 | 0 | 0 | 0 | 0 | 0 | 0 | 2 | 1 | 0 | 0 | 0 | 0 | 0 |
| Otu01789 | 1 | 0 | 0 | 0 | 0 | 0 | 0 | 0 | 0 | 1 | 0 | 0 | 0 | 0 | 0 | 0 |
| Otu01790 | 0 | 0 | 0 | 0 | 0 | 0 | 0 | 0 | 0 | 0 | 0 | 0 | 0 | 0 | 0 | 0 |
| Otu01791 | 1 | 0 | 0 | 0 | 1 | 0 | 0 | 0 | 0 | 0 | 0 | 0 | 0 | 0 | 0 | 0 |
| Otu01792 | 2 | 0 | 0 | 0 | 0 | 0 | 0 | 1 | 0 | 0 | 0 | 0 | 1 | 0 | 0 | 0 |
| Otu01794 | 3 | 0 | 0 | 0 | 0 | 0 | 0 | 0 | 0 | 3 | 0 | 0 | 0 | 0 | 0 | 0 |
| Otu01795 | 2 | 0 | 0 | 0 | 0 | 1 | 0 | 0 | 0 | 1 | 0 | 0 | 0 | 0 | 0 | 0 |
| Otu01796 | 2 | 0 | 0 | 0 | 0 | 0 | 1 | 0 | 0 | 1 | 0 | 0 | 0 | 0 | 0 | 0 |
| Otu01797 | 0 | 0 | 0 | 0 | 0 | 0 | 0 | 0 | 0 | 0 | 0 | 0 | 0 | 0 | 0 | 0 |
| Otu01798 | 2 | 0 | 0 | 0 | 0 | 0 | 0 | 0 | 0 | 0 | 0 | 2 | 0 | 0 | 0 | 0 |
| Otu01799 | 2 | 0 | 0 | 0 | 0 | 0 | 0 | 0 | 0 | 2 | 0 | 0 | 0 | 0 | 0 | 0 |
| Otu01800 | 3 | 0 | 0 | 0 | 0 | 0 | 0 | 3 | 0 | 0 | 0 | 0 | 0 | 0 | 0 | 0 |
| Otu01801 | 3 | 0 | 0 | 0 | 0 | 0 | 0 | 1 | 0 | 0 | 2 | 0 | 0 | 0 | 0 | 0 |
| Otu01803 | 3 | 0 | 0 | 0 | 0 | 0 | 0 | 0 | 1 | 1 | 1 | 0 | 0 | 0 | 0 | 0 |
| Otu01805 | 2 | 0 | 0 | 0 | 0 | 0 | 1 | 1 | 0 | 0 | 0 | 0 | 0 | 0 | 0 | 0 |
| Otu01806 | 2 | 0 | 0 | 0 | 0 | 0 | 0 | 0 | 0 | 0 | 2 | 0 | 0 | 0 | 0 | 0 |
| Otu01807 | 2 | 0 | 1 | 0 | 0 | 0 | 0 | 0 | 0 | 1 | 0 | 0 | 0 | 0 | 0 | 0 |
| Otu01808 | 3 | 0 | 0 | 0 | 0 | 0 | 0 | 0 | 1 | 1 | 1 | 0 | 0 | 0 | 0 | 0 |
| Otu01809 | 2 | 0 | 0 | 0 | 0 | 2 | 0 | 0 | 0 | 0 | 0 | 0 | 0 | 0 | 0 | 0 |
| Otu01810 | 1 | 0 | 0 | 0 | 0 | 0 | 0 | 0 | 0 | 1 | 0 | 0 | 0 | 0 | 0 | 0 |
| Otu01813 | 2 | 0 | 0 | 0 | 0 | 0 | 0 | 0 | 0 | 0 | 0 | 1 | 0 | 1 | 0 | 0 |
| Otu01814 | 3 | 0 | 0 | 0 | 0 | 0 | 1 | 0 | 0 | 1 | 1 | 0 | 0 | 0 | 0 | 0 |
| Otu01815 | 2 | 0 | 0 | 0 | 0 | 0 | 0 | 0 | 0 | 2 | 0 | 0 | 0 | 0 | 0 | 0 |
| Otu01816 | 1 | 0 | 0 | 0 | 0 | 0 | 0 | 0 | 0 | 0 | 1 | 0 | 0 | 0 | 0 | 0 |
| Otu01817 | 3 | 0 | 0 | 0 | 0 | 0 | 0 | 0 | 0 | 0 | 3 | 0 | 0 | 0 | 0 | 0 |
| Otu01820 | 3 | 0 | 0 | 0 | 0 | 0 | 1 | 0 | 0 | 0 | 1 | 1 | 0 | 0 | 0 | 0 |
| Otu01822 | 3 | 0 | 0 | 0 | 0 | 0 | 0 | 0 | 0 | 3 | 0 | 0 | 0 | 0 | 0 | 0 |
| Otu01824 | 1 | 0 | 0 | 1 | 0 | 0 | 0 | 0 | 0 | 0 | 0 | 0 | 0 | 0 | 0 | 0 |
| Otu01825 | 2 | 0 | 0 | 0 | 0 | 1 | 1 | 0 | 0 | 0 | 0 | 0 | 0 | 0 | 0 | 0 |
| Otu01827 | 2 | 0 | 0 | 0 | 0 | 2 | 0 | 0 | 0 | 0 | 0 | 0 | 0 | 0 | 0 | 0 |
| Otu01828 | 0 | 0 | 0 | 0 | 0 | 0 | 0 | 0 | 0 | 0 | 0 | 0 | 0 | 0 | 0 | 0 |
| Otu01829 | 3 | 0 | 0 | 0 | 0 | 0 | 2 | 0 | 0 | 0 | 1 | 0 | 0 | 0 | 0 | 0 |



Supplementary 1  
 Taxonomy and Abundance of OTUs (see taxonomy of OTUs in Table S1A)  
 Normalized data, identification according to blast UNITEv7

|          |   |   |   |   |   |   |   |   |   |   |   |   |   |   |   |   |   |
|----------|---|---|---|---|---|---|---|---|---|---|---|---|---|---|---|---|---|
| Otu01830 | 2 | 0 | 0 | 0 | 0 | 0 | 1 | 1 | 0 | 0 | 0 | 0 | 0 | 0 | 0 | 0 | 0 |
| Otu01831 | 1 | 0 | 0 | 0 | 0 | 1 | 0 | 0 | 0 | 0 | 0 | 0 | 0 | 0 | 0 | 0 | 0 |
| Otu01832 | 2 | 0 | 0 | 0 | 0 | 0 | 0 | 2 | 0 | 0 | 0 | 0 | 0 | 0 | 0 | 0 | 0 |
| Otu01834 | 1 | 0 | 0 | 0 | 0 | 0 | 0 | 0 | 0 | 1 | 0 | 0 | 0 | 0 | 0 | 0 | 0 |
| Otu01836 | 2 | 0 | 0 | 0 | 0 | 0 | 1 | 0 | 0 | 1 | 0 | 0 | 0 | 0 | 0 | 0 | 0 |
| Otu01837 | 2 | 0 | 0 | 0 | 0 | 0 | 0 | 0 | 0 | 0 | 0 | 1 | 0 | 1 | 0 | 0 | 0 |
| Otu01838 | 3 | 0 | 0 | 0 | 0 | 0 | 0 | 0 | 0 | 1 | 2 | 0 | 0 | 0 | 0 | 0 | 0 |
| Otu01839 | 3 | 0 | 0 | 0 | 0 | 0 | 0 | 0 | 2 | 1 | 0 | 0 | 0 | 0 | 0 | 0 | 0 |
| Otu01840 | 2 | 0 | 0 | 0 | 0 | 0 | 1 | 1 | 0 | 0 | 0 | 0 | 0 | 0 | 0 | 0 | 0 |
| Otu01843 | 1 | 0 | 0 | 0 | 1 | 0 | 0 | 0 | 0 | 0 | 0 | 0 | 0 | 0 | 0 | 0 | 0 |
| Otu01844 | 3 | 0 | 0 | 0 | 1 | 0 | 0 | 0 | 1 | 0 | 0 | 1 | 0 | 0 | 0 | 0 | 0 |
| Otu01845 | 1 | 0 | 1 | 0 | 0 | 0 | 0 | 0 | 0 | 0 | 0 | 0 | 0 | 0 | 0 | 0 | 0 |
| Otu01847 | 2 | 0 | 0 | 0 | 0 | 0 | 2 | 0 | 0 | 0 | 0 | 0 | 0 | 0 | 0 | 0 | 0 |
| Otu01848 | 3 | 0 | 0 | 0 | 0 | 0 | 3 | 0 | 0 | 0 | 0 | 0 | 0 | 0 | 0 | 0 | 0 |
| Otu01849 | 2 | 0 | 0 | 0 | 0 | 0 | 0 | 0 | 0 | 0 | 0 | 0 | 1 | 0 | 1 | 0 | 0 |
| Otu01850 | 0 | 0 | 0 | 0 | 0 | 0 | 0 | 0 | 0 | 0 | 0 | 0 | 0 | 0 | 0 | 0 | 0 |
| Otu01852 | 1 | 1 | 0 | 0 | 0 | 0 | 0 | 0 | 0 | 0 | 0 | 0 | 0 | 0 | 0 | 0 | 0 |
| Otu01853 | 2 | 0 | 0 | 0 | 0 | 0 | 1 | 0 | 0 | 0 | 1 | 0 | 0 | 0 | 0 | 0 | 0 |
| Otu01854 | 3 | 1 | 0 | 0 | 2 | 0 | 0 | 0 | 0 | 0 | 0 | 0 | 0 | 0 | 0 | 0 | 0 |
| Otu01855 | 3 | 0 | 0 | 0 | 0 | 3 | 0 | 0 | 0 | 0 | 0 | 0 | 0 | 0 | 0 | 0 | 0 |
| Otu01856 | 3 | 0 | 0 | 0 | 0 | 0 | 3 | 0 | 0 | 0 | 0 | 0 | 0 | 0 | 0 | 0 | 0 |
| Otu01857 | 2 | 0 | 0 | 0 | 1 | 0 | 0 | 0 | 1 | 0 | 0 | 0 | 0 | 0 | 0 | 0 | 0 |
| Otu01858 | 3 | 0 | 0 | 0 | 0 | 0 | 0 | 0 | 1 | 0 | 1 | 0 | 0 | 0 | 0 | 0 | 1 |
| Otu01859 | 3 | 0 | 0 | 0 | 0 | 1 | 0 | 0 | 0 | 2 | 0 | 0 | 0 | 0 | 0 | 0 | 0 |
| Otu01862 | 1 | 0 | 0 | 0 | 0 | 1 | 0 | 0 | 0 | 0 | 0 | 0 | 0 | 0 | 0 | 0 | 0 |
| Otu01863 | 2 | 0 | 0 | 0 | 0 | 0 | 1 | 0 | 1 | 0 | 0 | 0 | 0 | 0 | 0 | 0 | 0 |
| Otu01864 | 1 | 0 | 0 | 0 | 0 | 0 | 0 | 0 | 0 | 0 | 0 | 0 | 0 | 0 | 0 | 1 | 0 |
| Otu01865 | 2 | 0 | 0 | 0 | 0 | 0 | 1 | 0 | 0 | 0 | 1 | 0 | 0 | 0 | 0 | 0 | 0 |
| Otu01866 | 3 | 0 | 0 | 0 | 0 | 0 | 0 | 2 | 0 | 1 | 0 | 0 | 0 | 0 | 0 | 0 | 0 |
| Otu01867 | 1 | 0 | 0 | 0 | 0 | 0 | 0 | 0 | 0 | 0 | 0 | 0 | 0 | 0 | 0 | 1 | 0 |
| Otu01868 | 2 | 0 | 0 | 0 | 0 | 0 | 0 | 0 | 1 | 0 | 1 | 0 | 0 | 0 | 0 | 0 | 0 |
| Otu01869 | 2 | 0 | 0 | 0 | 0 | 0 | 1 | 0 | 1 | 0 | 0 | 0 | 0 | 0 | 0 | 0 | 0 |
| Otu01871 | 3 | 0 | 0 | 0 | 0 | 0 | 0 | 0 | 3 | 0 | 0 | 0 | 0 | 0 | 0 | 0 | 0 |
| Otu01872 | 2 | 0 | 0 | 0 | 0 | 0 | 0 | 0 | 0 | 2 | 0 | 0 | 0 | 0 | 0 | 0 | 0 |
| Otu01873 | 2 | 0 | 0 | 0 | 0 | 0 | 0 | 0 | 1 | 0 | 0 | 1 | 0 | 0 | 0 | 0 | 0 |
| Otu01875 | 2 | 0 | 2 | 0 | 0 | 0 | 0 | 0 | 0 | 0 | 0 | 0 | 0 | 0 | 0 | 0 | 0 |
| Otu01876 | 2 | 0 | 0 | 0 | 0 | 1 | 1 | 0 | 0 | 0 | 0 | 0 | 0 | 0 | 0 | 0 | 0 |
| Otu01878 | 1 | 0 | 0 | 0 | 0 | 0 | 0 | 0 | 0 | 0 | 0 | 0 | 0 | 0 | 0 | 1 | 0 |
| Otu01879 | 2 | 0 | 0 | 0 | 2 | 0 | 0 | 0 | 0 | 0 | 0 | 0 | 0 | 0 | 0 | 0 | 0 |
| Otu01880 | 2 | 0 | 0 | 0 | 0 | 0 | 0 | 0 | 1 | 0 | 1 | 0 | 0 | 0 | 0 | 0 | 0 |
| Otu01882 | 1 | 0 | 0 | 0 | 0 | 1 | 0 | 0 | 0 | 0 | 0 | 0 | 0 | 0 | 0 | 0 | 0 |
| Otu01883 | 3 | 0 | 0 | 0 | 0 | 0 | 0 | 3 | 0 | 0 | 0 | 0 | 0 | 0 | 0 | 0 | 0 |
| Otu01884 | 2 | 0 | 0 | 0 | 0 | 1 | 0 | 0 | 0 | 1 | 0 | 0 | 0 | 0 | 0 | 0 | 0 |

Supplementary 1  
 Taxonomy and Abundance of OTUs (see taxonomy of OTUs in Table S1A)  
 Normalized data, identification according to blast UNITEv7

|          |   |   |   |   |   |   |   |   |   |   |   |   |   |   |   |   |
|----------|---|---|---|---|---|---|---|---|---|---|---|---|---|---|---|---|
| Otu01886 | 1 | 0 | 0 | 0 | 0 | 0 | 0 | 0 | 1 | 0 | 0 | 0 | 0 | 0 | 0 | 0 |
| Otu01887 | 2 | 0 | 0 | 0 | 0 | 0 | 0 | 0 | 0 | 0 | 0 | 1 | 0 | 0 | 0 | 1 |
| Otu01888 | 2 | 0 | 0 | 0 | 0 | 0 | 0 | 0 | 0 | 1 | 1 | 0 | 0 | 0 | 0 | 0 |
| Otu01889 | 2 | 0 | 0 | 0 | 0 | 0 | 0 | 0 | 0 | 2 | 0 | 0 | 0 | 0 | 0 | 0 |
| Otu01890 | 2 | 0 | 0 | 0 | 0 | 0 | 0 | 0 | 0 | 0 | 1 | 0 | 0 | 1 | 0 | 0 |
| Otu01892 | 2 | 0 | 0 | 0 | 2 | 0 | 0 | 0 | 0 | 0 | 0 | 0 | 0 | 0 | 0 | 0 |
| Otu01894 | 1 | 1 | 0 | 0 | 0 | 0 | 0 | 0 | 0 | 0 | 0 | 0 | 0 | 0 | 0 | 0 |
| Otu01895 | 3 | 0 | 0 | 0 | 0 | 0 | 0 | 0 | 3 | 0 | 0 | 0 | 0 | 0 | 0 | 0 |
| Otu01896 | 2 | 0 | 0 | 0 | 0 | 0 | 0 | 0 | 1 | 0 | 1 | 0 | 0 | 0 | 0 | 0 |
| Otu01897 | 2 | 0 | 1 | 0 | 0 | 1 | 0 | 0 | 0 | 0 | 0 | 0 | 0 | 0 | 0 | 0 |
| Otu01898 | 2 | 0 | 0 | 0 | 0 | 2 | 0 | 0 | 0 | 0 | 0 | 0 | 0 | 0 | 0 | 0 |
| Otu01899 | 0 | 0 | 0 | 0 | 0 | 0 | 0 | 0 | 0 | 0 | 0 | 0 | 0 | 0 | 0 | 0 |
| Otu01900 | 3 | 0 | 0 | 0 | 0 | 0 | 1 | 0 | 1 | 0 | 1 | 0 | 0 | 0 | 0 | 0 |
| Otu01901 | 2 | 0 | 0 | 0 | 0 | 0 | 0 | 0 | 2 | 0 | 0 | 0 | 0 | 0 | 0 | 0 |
| Otu01902 | 1 | 0 | 0 | 0 | 0 | 0 | 0 | 1 | 0 | 0 | 0 | 0 | 0 | 0 | 0 | 0 |
| Otu01903 | 1 | 0 | 0 | 0 | 1 | 0 | 0 | 0 | 0 | 0 | 0 | 0 | 0 | 0 | 0 | 0 |
| Otu01904 | 3 | 0 | 0 | 0 | 0 | 0 | 0 | 1 | 0 | 0 | 2 | 0 | 0 | 0 | 0 | 0 |
| Otu01905 | 2 | 0 | 0 | 0 | 0 | 2 | 0 | 0 | 0 | 0 | 0 | 0 | 0 | 0 | 0 | 0 |
| Otu01906 | 2 | 0 | 0 | 0 | 0 | 0 | 0 | 0 | 1 | 1 | 0 | 0 | 0 | 0 | 0 | 0 |
| Otu01907 | 3 | 0 | 0 | 0 | 0 | 0 | 0 | 0 | 3 | 0 | 0 | 0 | 0 | 0 | 0 | 0 |
| Otu01908 | 3 | 0 | 0 | 0 | 0 | 0 | 2 | 0 | 0 | 1 | 0 | 0 | 0 | 0 | 0 | 0 |
| Otu01909 | 1 | 0 | 0 | 0 | 0 | 0 | 0 | 0 | 0 | 0 | 1 | 0 | 0 | 0 | 0 | 0 |
| Otu01910 | 3 | 0 | 0 | 0 | 0 | 0 | 0 | 1 | 2 | 0 | 0 | 0 | 0 | 0 | 0 | 0 |
| Otu01911 | 3 | 0 | 0 | 0 | 0 | 0 | 0 | 0 | 0 | 3 | 0 | 0 | 0 | 0 | 0 | 0 |
| Otu01912 | 3 | 0 | 0 | 0 | 0 | 0 | 0 | 0 | 3 | 0 | 0 | 0 | 0 | 0 | 0 | 0 |
| Otu01913 | 2 | 0 | 0 | 0 | 0 | 1 | 0 | 1 | 0 | 0 | 0 | 0 | 0 | 0 | 0 | 0 |
| Otu01914 | 3 | 0 | 0 | 0 | 0 | 1 | 1 | 0 | 0 | 1 | 0 | 0 | 0 | 0 | 0 | 0 |
| Otu01915 | 2 | 0 | 0 | 0 | 0 | 0 | 2 | 0 | 0 | 0 | 0 | 0 | 0 | 0 | 0 | 0 |
| Otu01916 | 3 | 0 | 0 | 0 | 0 | 1 | 2 | 0 | 0 | 0 | 0 | 0 | 0 | 0 | 0 | 0 |
| Otu01917 | 3 | 0 | 0 | 0 | 0 | 0 | 0 | 0 | 2 | 0 | 1 | 0 | 0 | 0 | 0 | 0 |
| Otu01918 | 3 | 0 | 0 | 0 | 0 | 0 | 0 | 3 | 0 | 0 | 0 | 0 | 0 | 0 | 0 | 0 |
| Otu01919 | 2 | 0 | 0 | 0 | 0 | 0 | 0 | 2 | 0 | 0 | 0 | 0 | 0 | 0 | 0 | 0 |
| Otu01920 | 1 | 0 | 0 | 1 | 0 | 0 | 0 | 0 | 0 | 0 | 0 | 0 | 0 | 0 | 0 | 0 |
| Otu01921 | 3 | 0 | 0 | 0 | 0 | 0 | 1 | 1 | 1 | 0 | 0 | 0 | 0 | 0 | 0 | 0 |
| Otu01922 | 2 | 0 | 0 | 1 | 0 | 0 | 0 | 0 | 0 | 0 | 0 | 0 | 0 | 0 | 1 | 0 |
| Otu01923 | 2 | 0 | 0 | 0 | 0 | 0 | 0 | 0 | 0 | 0 | 1 | 0 | 0 | 1 | 0 | 0 |
| Otu01924 | 1 | 0 | 0 | 0 | 0 | 0 | 0 | 0 | 0 | 0 | 0 | 0 | 0 | 0 | 0 | 1 |
| Otu01926 | 3 | 0 | 0 | 0 | 0 | 0 | 0 | 1 | 0 | 0 | 0 | 1 | 0 | 0 | 1 | 0 |
| Otu01928 | 1 | 0 | 0 | 0 | 0 | 0 | 0 | 0 | 0 | 0 | 0 | 1 | 0 | 0 | 0 | 0 |
| Otu01929 | 3 | 0 | 3 | 0 | 0 | 0 | 0 | 0 | 0 | 0 | 0 | 0 | 0 | 0 | 0 | 0 |
| Otu01931 | 2 | 0 | 0 | 0 | 0 | 2 | 0 | 0 | 0 | 0 | 0 | 0 | 0 | 0 | 0 | 0 |
| Otu01932 | 2 | 0 | 0 | 0 | 0 | 0 | 0 | 0 | 0 | 2 | 0 | 0 | 0 | 0 | 0 | 0 |
| Otu01934 | 3 | 0 | 0 | 0 | 0 | 0 | 0 | 3 | 0 | 0 | 0 | 0 | 0 | 0 | 0 | 0 |

Supplementary 1  
 Taxonomy and Abundance of OTUs (see taxonomy of OTUs in Table S1A)  
 Normalized data, identification according to blast UNITEv7

|          |   |   |   |   |   |   |   |   |   |   |   |   |   |   |   |   |
|----------|---|---|---|---|---|---|---|---|---|---|---|---|---|---|---|---|
| Otu01935 | 3 | 0 | 0 | 0 | 0 | 0 | 0 | 0 | 0 | 3 | 0 | 0 | 0 | 0 | 0 | 0 |
| Otu01937 | 2 | 0 | 0 | 0 | 0 | 0 | 0 | 1 | 0 | 0 | 0 | 1 | 0 | 0 | 0 | 0 |
| Otu01938 | 1 | 0 | 0 | 0 | 0 | 1 | 0 | 0 | 0 | 0 | 0 | 0 | 0 | 0 | 0 | 0 |
| Otu01939 | 1 | 0 | 0 | 0 | 0 | 1 | 0 | 0 | 0 | 0 | 0 | 0 | 0 | 0 | 0 | 0 |
| Otu01940 | 3 | 0 | 0 | 0 | 0 | 0 | 0 | 0 | 3 | 0 | 0 | 0 | 0 | 0 | 0 | 0 |
| Otu01942 | 2 | 0 | 0 | 0 | 0 | 2 | 0 | 0 | 0 | 0 | 0 | 0 | 0 | 0 | 0 | 0 |
| Otu01944 | 2 | 0 | 0 | 0 | 0 | 0 | 0 | 2 | 0 | 0 | 0 | 0 | 0 | 0 | 0 | 0 |
| Otu01945 | 1 | 0 | 0 | 0 | 0 | 0 | 0 | 0 | 1 | 0 | 0 | 0 | 0 | 0 | 0 | 0 |
| Otu01946 | 1 | 0 | 0 | 1 | 0 | 0 | 0 | 0 | 0 | 0 | 0 | 0 | 0 | 0 | 0 | 0 |
| Otu01947 | 3 | 0 | 0 | 0 | 0 | 0 | 0 | 3 | 0 | 0 | 0 | 0 | 0 | 0 | 0 | 0 |
| Otu01948 | 1 | 0 | 0 | 0 | 0 | 0 | 0 | 0 | 0 | 0 | 0 | 0 | 0 | 1 | 0 | 0 |
| Otu01949 | 1 | 0 | 0 | 0 | 0 | 0 | 0 | 0 | 0 | 1 | 0 | 0 | 0 | 0 | 0 | 0 |
| Otu01950 | 2 | 0 | 0 | 0 | 0 | 0 | 0 | 1 | 0 | 0 | 0 | 1 | 0 | 0 | 0 | 0 |
| Otu01952 | 3 | 0 | 0 | 0 | 0 | 0 | 1 | 0 | 1 | 0 | 1 | 0 | 0 | 0 | 0 | 0 |
| Otu01953 | 3 | 0 | 0 | 0 | 0 | 0 | 0 | 0 | 0 | 1 | 1 | 1 | 0 | 0 | 0 | 0 |
| Otu01954 | 1 | 0 | 0 | 0 | 0 | 0 | 0 | 0 | 0 | 0 | 0 | 0 | 0 | 0 | 1 | 0 |
| Otu01955 | 1 | 0 | 1 | 0 | 0 | 0 | 0 | 0 | 0 | 0 | 0 | 0 | 0 | 0 | 0 | 0 |
| Otu01956 | 2 | 0 | 0 | 0 | 0 | 0 | 0 | 0 | 0 | 0 | 0 | 2 | 0 | 0 | 0 | 0 |
| Otu01957 | 3 | 0 | 0 | 0 | 0 | 0 | 1 | 0 | 1 | 0 | 0 | 1 | 0 | 0 | 0 | 0 |
| Otu01958 | 1 | 0 | 0 | 0 | 0 | 0 | 1 | 0 | 0 | 0 | 0 | 0 | 0 | 0 | 0 | 0 |
| Otu01959 | 2 | 0 | 0 | 0 | 0 | 0 | 0 | 1 | 0 | 1 | 0 | 0 | 0 | 0 | 0 | 0 |
| Otu01960 | 1 | 0 | 0 | 0 | 0 | 0 | 0 | 0 | 0 | 0 | 0 | 0 | 1 | 0 | 0 | 0 |
| Otu01962 | 1 | 0 | 0 | 0 | 0 | 0 | 0 | 0 | 0 | 0 | 1 | 0 | 0 | 0 | 0 | 0 |
| Otu01966 | 1 | 0 | 0 | 1 | 0 | 0 | 0 | 0 | 0 | 0 | 0 | 0 | 0 | 0 | 0 | 0 |
| Otu01967 | 2 | 0 | 0 | 0 | 0 | 0 | 0 | 1 | 0 | 1 | 0 | 0 | 0 | 0 | 0 | 0 |
| Otu01968 | 2 | 0 | 2 | 0 | 0 | 0 | 0 | 0 | 0 | 0 | 0 | 0 | 0 | 0 | 0 | 0 |
| Otu01969 | 1 | 0 | 0 | 0 | 0 | 1 | 0 | 0 | 0 | 0 | 0 | 0 | 0 | 0 | 0 | 0 |
| Otu01970 | 2 | 0 | 0 | 0 | 0 | 0 | 0 | 0 | 0 | 1 | 0 | 1 | 0 | 0 | 0 | 0 |
| Otu01971 | 1 | 0 | 0 | 0 | 0 | 0 | 0 | 0 | 1 | 0 | 0 | 0 | 0 | 0 | 0 | 0 |
| Otu01973 | 2 | 0 | 0 | 0 | 0 | 0 | 1 | 0 | 0 | 0 | 1 | 0 | 0 | 0 | 0 | 0 |
| Otu01974 | 2 | 0 | 0 | 0 | 0 | 0 | 0 | 0 | 1 | 0 | 1 | 0 | 0 | 0 | 0 | 0 |
| Otu01975 | 1 | 0 | 0 | 0 | 0 | 1 | 0 | 0 | 0 | 0 | 0 | 0 | 0 | 0 | 0 | 0 |
| Otu01977 | 2 | 0 | 0 | 0 | 0 | 0 | 0 | 0 | 0 | 2 | 0 | 0 | 0 | 0 | 0 | 0 |
| Otu01978 | 1 | 1 | 0 | 0 | 0 | 0 | 0 | 0 | 0 | 0 | 0 | 0 | 0 | 0 | 0 | 0 |
| Otu01979 | 0 | 0 | 0 | 0 | 0 | 0 | 0 | 0 | 0 | 0 | 0 | 0 | 0 | 0 | 0 | 0 |
| Otu01980 | 1 | 0 | 1 | 0 | 0 | 0 | 0 | 0 | 0 | 0 | 0 | 0 | 0 | 0 | 0 | 0 |
| Otu01981 | 2 | 0 | 0 | 0 | 0 | 0 | 0 | 0 | 0 | 0 | 2 | 0 | 0 | 0 | 0 | 0 |
| Otu01982 | 2 | 0 | 2 | 0 | 0 | 0 | 0 | 0 | 0 | 0 | 0 | 0 | 0 | 0 | 0 | 0 |
| Otu01985 | 2 | 0 | 0 | 0 | 0 | 0 | 1 | 0 | 1 | 0 | 0 | 0 | 0 | 0 | 0 | 0 |
| Otu01986 | 2 | 0 | 0 | 0 | 0 | 0 | 0 | 0 | 2 | 0 | 0 | 0 | 0 | 0 | 0 | 0 |
| Otu01987 | 1 | 0 | 0 | 0 | 0 | 0 | 1 | 0 | 0 | 0 | 0 | 0 | 0 | 0 | 0 | 0 |
| Otu01988 | 2 | 0 | 0 | 0 | 0 | 0 | 0 | 0 | 0 | 1 | 0 | 0 | 0 | 0 | 1 | 0 |
| Otu01989 | 1 | 0 | 0 | 1 | 0 | 0 | 0 | 0 | 0 | 0 | 0 | 0 | 0 | 0 | 0 | 0 |

Supplementary 1  
 Taxonomy and Abundance of OTUs (see taxonomy of OTUs in Table S1A)  
 Normalized data, identification according to blast UNITEv7

|          |   |   |   |   |   |   |   |   |   |   |   |   |   |   |   |   |
|----------|---|---|---|---|---|---|---|---|---|---|---|---|---|---|---|---|
| Otu01990 | 0 | 0 | 0 | 0 | 0 | 0 | 0 | 0 | 0 | 0 | 0 | 0 | 0 | 0 | 0 | 0 |
| Otu01991 | 1 | 0 | 0 | 0 | 0 | 1 | 0 | 0 | 0 | 0 | 0 | 0 | 0 | 0 | 0 | 0 |
| Otu01993 | 1 | 0 | 0 | 1 | 0 | 0 | 0 | 0 | 0 | 0 | 0 | 0 | 0 | 0 | 0 | 0 |
| Otu01994 | 1 | 0 | 0 | 0 | 0 | 0 | 0 | 0 | 0 | 0 | 0 | 1 | 0 | 0 | 0 | 0 |
| Otu01996 | 1 | 0 | 0 | 0 | 0 | 0 | 0 | 0 | 0 | 0 | 0 | 1 | 0 | 0 | 0 | 0 |
| Otu01997 | 2 | 0 | 0 | 0 | 0 | 1 | 0 | 0 | 0 | 0 | 0 | 0 | 1 | 0 | 0 | 0 |
| Otu01998 | 1 | 0 | 0 | 0 | 0 | 0 | 0 | 0 | 0 | 1 | 0 | 0 | 0 | 0 | 0 | 0 |
| Otu01999 | 2 | 0 | 0 | 0 | 0 | 0 | 0 | 2 | 0 | 0 | 0 | 0 | 0 | 0 | 0 | 0 |
| Otu02000 | 1 | 1 | 0 | 0 | 0 | 0 | 0 | 0 | 0 | 0 | 0 | 0 | 0 | 0 | 0 | 0 |
| Otu02001 | 1 | 0 | 0 | 0 | 0 | 0 | 0 | 0 | 1 | 0 | 0 | 0 | 0 | 0 | 0 | 0 |
| Otu02002 | 2 | 0 | 0 | 2 | 0 | 0 | 0 | 0 | 0 | 0 | 0 | 0 | 0 | 0 | 0 | 0 |
| Otu02003 | 1 | 0 | 0 | 0 | 0 | 0 | 0 | 1 | 0 | 0 | 0 | 0 | 0 | 0 | 0 | 0 |
| Otu02004 | 1 | 0 | 0 | 0 | 0 | 0 | 0 | 0 | 0 | 0 | 0 | 0 | 0 | 0 | 1 | 0 |
| Otu02005 | 2 | 0 | 0 | 0 | 0 | 0 | 0 | 1 | 0 | 0 | 1 | 0 | 0 | 0 | 0 | 0 |
| Otu02006 | 1 | 0 | 1 | 0 | 0 | 0 | 0 | 0 | 0 | 0 | 0 | 0 | 0 | 0 | 0 | 0 |
| Otu02007 | 2 | 0 | 0 | 0 | 0 | 0 | 0 | 0 | 1 | 1 | 0 | 0 | 0 | 0 | 0 | 0 |
| Otu02008 | 1 | 0 | 1 | 0 | 0 | 0 | 0 | 0 | 0 | 0 | 0 | 0 | 0 | 0 | 0 | 0 |
| Otu02009 | 2 | 0 | 0 | 0 | 0 | 0 | 2 | 0 | 0 | 0 | 0 | 0 | 0 | 0 | 0 | 0 |
| Otu02010 | 2 | 0 | 0 | 0 | 0 | 0 | 0 | 0 | 0 | 0 | 0 | 0 | 0 | 0 | 2 | 0 |
| Otu02011 | 2 | 0 | 0 | 2 | 0 | 0 | 0 | 0 | 0 | 0 | 0 | 0 | 0 | 0 | 0 | 0 |
| Otu02012 | 1 | 0 | 0 | 0 | 0 | 0 | 0 | 0 | 0 | 1 | 0 | 0 | 0 | 0 | 0 | 0 |
| Otu02014 | 2 | 0 | 0 | 0 | 0 | 1 | 1 | 0 | 0 | 0 | 0 | 0 | 0 | 0 | 0 | 0 |
| Otu02016 | 2 | 0 | 0 | 0 | 0 | 2 | 0 | 0 | 0 | 0 | 0 | 0 | 0 | 0 | 0 | 0 |
| Otu02017 | 1 | 0 | 0 | 0 | 0 | 1 | 0 | 0 | 0 | 0 | 0 | 0 | 0 | 0 | 0 | 0 |
| Otu02019 | 2 | 0 | 0 | 0 | 0 | 0 | 0 | 0 | 1 | 0 | 1 | 0 | 0 | 0 | 0 | 0 |
| Otu02020 | 2 | 0 | 0 | 0 | 0 | 2 | 0 | 0 | 0 | 0 | 0 | 0 | 0 | 0 | 0 | 0 |
| Otu02021 | 1 | 1 | 0 | 0 | 0 | 0 | 0 | 0 | 0 | 0 | 0 | 0 | 0 | 0 | 0 | 0 |
| Otu02022 | 1 | 0 | 0 | 0 | 0 | 1 | 0 | 0 | 0 | 0 | 0 | 0 | 0 | 0 | 0 | 0 |
| Otu02023 | 2 | 0 | 0 | 0 | 0 | 2 | 0 | 0 | 0 | 0 | 0 | 0 | 0 | 0 | 0 | 0 |
| Otu02024 | 1 | 0 | 0 | 0 | 0 | 1 | 0 | 0 | 0 | 0 | 0 | 0 | 0 | 0 | 0 | 0 |
| Otu02025 | 1 | 0 | 0 | 0 | 1 | 0 | 0 | 0 | 0 | 0 | 0 | 0 | 0 | 0 | 0 | 0 |
| Otu02026 | 1 | 0 | 0 | 0 | 0 | 0 | 1 | 0 | 0 | 0 | 0 | 0 | 0 | 0 | 0 | 0 |
| Otu02027 | 1 | 0 | 0 | 1 | 0 | 0 | 0 | 0 | 0 | 0 | 0 | 0 | 0 | 0 | 0 | 0 |
| Otu02028 | 1 | 0 | 0 | 0 | 0 | 0 | 0 | 0 | 0 | 0 | 1 | 0 | 0 | 0 | 0 | 0 |
| Otu02030 | 1 | 0 | 0 | 0 | 0 | 0 | 0 | 0 | 0 | 0 | 1 | 0 | 0 | 0 | 0 | 0 |
| Otu02031 | 2 | 0 | 0 | 0 | 0 | 0 | 1 | 0 | 1 | 0 | 0 | 0 | 0 | 0 | 0 | 0 |
| Otu02032 | 2 | 0 | 0 | 0 | 0 | 0 | 0 | 1 | 1 | 0 | 0 | 0 | 0 | 0 | 0 | 0 |
| Otu02034 | 2 | 2 | 0 | 0 | 0 | 0 | 0 | 0 | 0 | 0 | 0 | 0 | 0 | 0 | 0 | 0 |
| Otu02036 | 1 | 0 | 0 | 0 | 0 | 0 | 0 | 0 | 0 | 1 | 0 | 0 | 0 | 0 | 0 | 0 |
| Otu02037 | 1 | 0 | 0 | 0 | 0 | 1 | 0 | 0 | 0 | 0 | 0 | 0 | 0 | 0 | 0 | 0 |
| Otu02038 | 1 | 0 | 0 | 0 | 0 | 0 | 0 | 0 | 0 | 0 | 0 | 0 | 0 | 0 | 1 | 0 |
| Otu02039 | 2 | 0 | 0 | 0 | 0 | 0 | 0 | 1 | 1 | 0 | 0 | 0 | 0 | 0 | 0 | 0 |
| Otu02040 | 1 | 0 | 0 | 0 | 0 | 0 | 0 | 0 | 1 | 0 | 0 | 0 | 0 | 0 | 0 | 0 |

Supplementary 1  
 Taxonomy and Abundance of OTUs (see taxonomy of OTUs in Table S1A)  
 Normalized data, identification according to blast UNITEv7

|          |   |   |   |   |   |   |   |   |   |   |   |   |   |   |   |   |
|----------|---|---|---|---|---|---|---|---|---|---|---|---|---|---|---|---|
| Otu02041 | 2 | 0 | 0 | 0 | 0 | 0 | 0 | 0 | 2 | 0 | 0 | 0 | 0 | 0 | 0 | 0 |
| Otu02043 | 1 | 0 | 0 | 0 | 0 | 1 | 0 | 0 | 0 | 0 | 0 | 0 | 0 | 0 | 0 | 0 |
| Otu02044 | 2 | 0 | 0 | 0 | 0 | 0 | 0 | 0 | 2 | 0 | 0 | 0 | 0 | 0 | 0 | 0 |
| Otu02046 | 1 | 0 | 0 | 0 | 0 | 0 | 0 | 0 | 0 | 0 | 0 | 0 | 0 | 0 | 1 | 0 |
| Otu02047 | 2 | 0 | 0 | 0 | 0 | 0 | 0 | 0 | 2 | 0 | 0 | 0 | 0 | 0 | 0 | 0 |
| Otu02049 | 2 | 0 | 0 | 0 | 0 | 0 | 0 | 0 | 0 | 0 | 2 | 0 | 0 | 0 | 0 | 0 |
| Otu02052 | 2 | 2 | 0 | 0 | 0 | 0 | 0 | 0 | 0 | 0 | 0 | 0 | 0 | 0 | 0 | 0 |
| Otu02053 | 2 | 0 | 0 | 0 | 0 | 0 | 0 | 0 | 1 | 0 | 1 | 0 | 0 | 0 | 0 | 0 |
| Otu02054 | 1 | 0 | 0 | 0 | 0 | 0 | 0 | 0 | 1 | 0 | 0 | 0 | 0 | 0 | 0 | 0 |
| Otu02055 | 2 | 0 | 0 | 0 | 0 | 0 | 0 | 0 | 0 | 2 | 0 | 0 | 0 | 0 | 0 | 0 |
| Otu02057 | 2 | 0 | 0 | 0 | 0 | 0 | 2 | 0 | 0 | 0 | 0 | 0 | 0 | 0 | 0 | 0 |
| Otu02058 | 2 | 0 | 0 | 0 | 0 | 2 | 0 | 0 | 0 | 0 | 0 | 0 | 0 | 0 | 0 | 0 |
| Otu02060 | 2 | 0 | 0 | 0 | 0 | 0 | 0 | 1 | 1 | 0 | 0 | 0 | 0 | 0 | 0 | 0 |
| Otu02063 | 2 | 0 | 0 | 0 | 0 | 0 | 0 | 0 | 0 | 0 | 2 | 0 | 0 | 0 | 0 | 0 |
| Otu02064 | 1 | 0 | 0 | 1 | 0 | 0 | 0 | 0 | 0 | 0 | 0 | 0 | 0 | 0 | 0 | 0 |
| Otu02065 | 1 | 0 | 0 | 0 | 0 | 0 | 0 | 0 | 0 | 0 | 0 | 0 | 0 | 0 | 1 | 0 |
| Otu02066 | 2 | 0 | 0 | 0 | 0 | 0 | 0 | 0 | 0 | 0 | 0 | 1 | 1 | 0 | 0 | 0 |
| Otu02068 | 1 | 0 | 0 | 0 | 0 | 0 | 0 | 0 | 0 | 0 | 1 | 0 | 0 | 0 | 0 | 0 |
| Otu02069 | 1 | 0 | 0 | 0 | 1 | 0 | 0 | 0 | 0 | 0 | 0 | 0 | 0 | 0 | 0 | 0 |
| Otu02070 | 2 | 0 | 0 | 0 | 0 | 0 | 0 | 0 | 1 | 0 | 0 | 0 | 0 | 0 | 0 | 1 |
| Otu02071 | 1 | 0 | 0 | 0 | 0 | 0 | 0 | 0 | 0 | 0 | 1 | 0 | 0 | 0 | 0 | 0 |
| Otu02073 | 2 | 0 | 0 | 0 | 0 | 0 | 0 | 0 | 1 | 1 | 0 | 0 | 0 | 0 | 0 | 0 |
| Otu02074 | 1 | 0 | 0 | 0 | 0 | 0 | 0 | 0 | 0 | 1 | 0 | 0 | 0 | 0 | 0 | 0 |
| Otu02075 | 1 | 1 | 0 | 0 | 0 | 0 | 0 | 0 | 0 | 0 | 0 | 0 | 0 | 0 | 0 | 0 |
| Otu02076 | 2 | 0 | 0 | 1 | 1 | 0 | 0 | 0 | 0 | 0 | 0 | 0 | 0 | 0 | 0 | 0 |
| Otu02077 | 1 | 0 | 0 | 0 | 0 | 0 | 0 | 0 | 0 | 0 | 0 | 0 | 0 | 1 | 0 | 0 |
| Otu02078 | 1 | 0 | 0 | 0 | 0 | 0 | 0 | 0 | 0 | 0 | 1 | 0 | 0 | 0 | 0 | 0 |
| Otu02079 | 2 | 0 | 0 | 0 | 0 | 0 | 0 | 2 | 0 | 0 | 0 | 0 | 0 | 0 | 0 | 0 |
| Otu02082 | 1 | 0 | 0 | 0 | 0 | 0 | 0 | 0 | 0 | 0 | 0 | 0 | 0 | 1 | 0 | 0 |
| Otu02084 | 2 | 0 | 0 | 0 | 0 | 0 | 2 | 0 | 0 | 0 | 0 | 0 | 0 | 0 | 0 | 0 |
| Otu02085 | 0 | 0 | 0 | 0 | 0 | 0 | 0 | 0 | 0 | 0 | 0 | 0 | 0 | 0 | 0 | 0 |
| Otu02086 | 2 | 0 | 0 | 0 | 0 | 0 | 0 | 1 | 1 | 0 | 0 | 0 | 0 | 0 | 0 | 0 |
| Otu02087 | 2 | 0 | 0 | 0 | 0 | 0 | 0 | 0 | 0 | 2 | 0 | 0 | 0 | 0 | 0 | 0 |
| Otu02088 | 1 | 0 | 0 | 0 | 1 | 0 | 0 | 0 | 0 | 0 | 0 | 0 | 0 | 0 | 0 | 0 |
| Otu02089 | 2 | 0 | 0 | 0 | 0 | 0 | 1 | 0 | 0 | 0 | 0 | 0 | 0 | 0 | 1 | 0 |
| Otu02090 | 2 | 0 | 0 | 0 | 0 | 0 | 0 | 2 | 0 | 0 | 0 | 0 | 0 | 0 | 0 | 0 |
| Otu02091 | 2 | 0 | 0 | 0 | 2 | 0 | 0 | 0 | 0 | 0 | 0 | 0 | 0 | 0 | 0 | 0 |
| Otu02093 | 2 | 0 | 0 | 0 | 0 | 0 | 0 | 0 | 1 | 1 | 0 | 0 | 0 | 0 | 0 | 0 |
| Otu02094 | 1 | 0 | 0 | 0 | 0 | 0 | 0 | 0 | 1 | 0 | 0 | 0 | 0 | 0 | 0 | 0 |
| Otu02095 | 1 | 0 | 0 | 0 | 1 | 0 | 0 | 0 | 0 | 0 | 0 | 0 | 0 | 0 | 0 | 0 |
| Otu02096 | 2 | 0 | 0 | 0 | 0 | 2 | 0 | 0 | 0 | 0 | 0 | 0 | 0 | 0 | 0 | 0 |
| Otu02097 | 1 | 0 | 0 | 0 | 0 | 0 | 1 | 0 | 0 | 0 | 0 | 0 | 0 | 0 | 0 | 0 |
| Otu02098 | 1 | 0 | 0 | 0 | 1 | 0 | 0 | 0 | 0 | 0 | 0 | 0 | 0 | 0 | 0 | 0 |

Supplementary 1  
 Taxonomy and Abundance of OTUs (see taxonomy of OTUs in Table S1A)  
 Normalized data, identification according to blast UNITEv7

|          |   |   |   |   |   |   |   |   |   |   |   |   |   |   |   |   |
|----------|---|---|---|---|---|---|---|---|---|---|---|---|---|---|---|---|
| Otu02100 | 2 | 0 | 0 | 0 | 0 | 0 | 0 | 0 | 1 | 1 | 0 | 0 | 0 | 0 | 0 | 0 |
| Otu02101 | 1 | 0 | 0 | 0 | 0 | 0 | 0 | 0 | 0 | 0 | 0 | 0 | 0 | 0 | 0 | 1 |
| Otu02103 | 1 | 0 | 0 | 0 | 0 | 0 | 0 | 0 | 0 | 1 | 0 | 0 | 0 | 0 | 0 | 0 |
| Otu02104 | 2 | 0 | 0 | 0 | 0 | 2 | 0 | 0 | 0 | 0 | 0 | 0 | 0 | 0 | 0 | 0 |
| Otu02106 | 1 | 0 | 0 | 0 | 0 | 0 | 1 | 0 | 0 | 0 | 0 | 0 | 0 | 0 | 0 | 0 |
| Otu02107 | 1 | 0 | 0 | 0 | 0 | 0 | 0 | 1 | 0 | 0 | 0 | 0 | 0 | 0 | 0 | 0 |
| Otu02108 | 1 | 0 | 0 | 0 | 0 | 0 | 0 | 0 | 0 | 1 | 0 | 0 | 0 | 0 | 0 | 0 |
| Otu02110 | 1 | 0 | 0 | 0 | 0 | 1 | 0 | 0 | 0 | 0 | 0 | 0 | 0 | 0 | 0 | 0 |
| Otu02112 | 2 | 0 | 0 | 0 | 0 | 0 | 0 | 1 | 0 | 1 | 0 | 0 | 0 | 0 | 0 | 0 |
| Otu02113 | 2 | 0 | 0 | 0 | 0 | 0 | 1 | 0 | 1 | 0 | 0 | 0 | 0 | 0 | 0 | 0 |
| Otu02114 | 1 | 0 | 0 | 0 | 0 | 0 | 0 | 0 | 0 | 0 | 0 | 1 | 0 | 0 | 0 | 0 |
| Otu02115 | 2 | 0 | 0 | 0 | 0 | 0 | 0 | 0 | 2 | 0 | 0 | 0 | 0 | 0 | 0 | 0 |
| Otu02117 | 1 | 0 | 0 | 0 | 0 | 1 | 0 | 0 | 0 | 0 | 0 | 0 | 0 | 0 | 0 | 0 |
| Otu02118 | 1 | 0 | 0 | 1 | 0 | 0 | 0 | 0 | 0 | 0 | 0 | 0 | 0 | 0 | 0 | 0 |
| Otu02119 | 1 | 0 | 0 | 0 | 0 | 0 | 0 | 0 | 0 | 0 | 1 | 0 | 0 | 0 | 0 | 0 |
| Otu02120 | 1 | 0 | 0 | 0 | 0 | 0 | 0 | 1 | 0 | 0 | 0 | 0 | 0 | 0 | 0 | 0 |
| Otu02123 | 2 | 0 | 0 | 0 | 0 | 0 | 1 | 0 | 0 | 1 | 0 | 0 | 0 | 0 | 0 | 0 |
| Otu02124 | 1 | 0 | 0 | 0 | 0 | 0 | 0 | 0 | 0 | 0 | 0 | 0 | 0 | 0 | 1 | 0 |
| Otu02126 | 2 | 0 | 0 | 0 | 0 | 0 | 0 | 1 | 0 | 0 | 1 | 0 | 0 | 0 | 0 | 0 |
| Otu02127 | 2 | 0 | 0 | 0 | 0 | 0 | 1 | 0 | 0 | 0 | 1 | 0 | 0 | 0 | 0 | 0 |
| Otu02128 | 2 | 0 | 0 | 0 | 0 | 0 | 0 | 1 | 0 | 0 | 1 | 0 | 0 | 0 | 0 | 0 |
| Otu02129 | 2 | 0 | 0 | 1 | 1 | 0 | 0 | 0 | 0 | 0 | 0 | 0 | 0 | 0 | 0 | 0 |
| Otu02130 | 2 | 0 | 0 | 0 | 0 | 0 | 0 | 1 | 0 | 0 | 1 | 0 | 0 | 0 | 0 | 0 |
| Otu02131 | 2 | 0 | 0 | 0 | 0 | 0 | 0 | 0 | 0 | 1 | 0 | 1 | 0 | 0 | 0 | 0 |
| Otu02132 | 1 | 0 | 0 | 0 | 0 | 0 | 0 | 1 | 0 | 0 | 0 | 0 | 0 | 0 | 0 | 0 |
| Otu02135 | 2 | 0 | 0 | 0 | 0 | 0 | 0 | 0 | 0 | 0 | 2 | 0 | 0 | 0 | 0 | 0 |
| Otu02136 | 2 | 0 | 0 | 0 | 0 | 0 | 0 | 0 | 0 | 1 | 1 | 0 | 0 | 0 | 0 | 0 |
| Otu02137 | 2 | 0 | 0 | 0 | 0 | 0 | 0 | 0 | 1 | 0 | 1 | 0 | 0 | 0 | 0 | 0 |
| Otu02138 | 1 | 0 | 0 | 0 | 0 | 0 | 0 | 0 | 0 | 0 | 0 | 0 | 1 | 0 | 0 | 0 |
| Otu02141 | 1 | 0 | 0 | 0 | 0 | 1 | 0 | 0 | 0 | 0 | 0 | 0 | 0 | 0 | 0 | 0 |
| Otu02143 | 1 | 0 | 0 | 0 | 0 | 0 | 0 | 0 | 0 | 0 | 0 | 0 | 1 | 0 | 0 | 0 |
| Otu02144 | 1 | 0 | 0 | 0 | 0 | 0 | 0 | 0 | 1 | 0 | 0 | 0 | 0 | 0 | 0 | 0 |
| Otu02145 | 1 | 0 | 0 | 0 | 0 | 0 | 0 | 0 | 1 | 0 | 0 | 0 | 0 | 0 | 0 | 0 |
| Otu02146 | 2 | 0 | 0 | 0 | 1 | 0 | 0 | 0 | 1 | 0 | 0 | 0 | 0 | 0 | 0 | 0 |
| Otu02148 | 1 | 0 | 0 | 0 | 1 | 0 | 0 | 0 | 0 | 0 | 0 | 0 | 0 | 0 | 0 | 0 |
| Otu02149 | 2 | 0 | 0 | 0 | 0 | 0 | 0 | 0 | 2 | 0 | 0 | 0 | 0 | 0 | 0 | 0 |
| Otu02150 | 2 | 0 | 0 | 0 | 0 | 0 | 1 | 0 | 0 | 1 | 0 | 0 | 0 | 0 | 0 | 0 |
| Otu02151 | 1 | 0 | 0 | 0 | 0 | 0 | 0 | 0 | 0 | 0 | 0 | 0 | 1 | 0 | 0 | 0 |
| Otu02152 | 1 | 0 | 0 | 0 | 0 | 0 | 1 | 0 | 0 | 0 | 0 | 0 | 0 | 0 | 0 | 0 |
| Otu02153 | 2 | 0 | 0 | 0 | 0 | 0 | 1 | 1 | 0 | 0 | 0 | 0 | 0 | 0 | 0 | 0 |
| Otu02154 | 2 | 0 | 0 | 0 | 0 | 0 | 0 | 1 | 0 | 0 | 1 | 0 | 0 | 0 | 0 | 0 |
| Otu02155 | 1 | 0 | 0 | 0 | 0 | 0 | 0 | 0 | 0 | 0 | 0 | 0 | 1 | 0 | 0 | 0 |
| Otu02157 | 2 | 0 | 0 | 0 | 0 | 0 | 0 | 0 | 0 | 0 | 0 | 1 | 0 | 1 | 0 | 0 |

Supplementary 1  
 Taxonomy and Abundance of OTUs (see taxonomy of OTUs in Table S1A)  
 Normalized data, identification according to blast UNITEv7

|          |   |   |   |   |   |   |   |   |   |   |   |   |   |   |   |   |
|----------|---|---|---|---|---|---|---|---|---|---|---|---|---|---|---|---|
| Otu02158 | 1 | 0 | 0 | 0 | 0 | 0 | 0 | 0 | 0 | 0 | 0 | 0 | 1 | 0 | 0 | 0 |
| Otu02159 | 2 | 0 | 0 | 2 | 0 | 0 | 0 | 0 | 0 | 0 | 0 | 0 | 0 | 0 | 0 | 0 |
| Otu02160 | 1 | 0 | 0 | 0 | 0 | 0 | 0 | 0 | 1 | 0 | 0 | 0 | 0 | 0 | 0 | 0 |
| Otu02161 | 2 | 0 | 0 | 0 | 0 | 0 | 0 | 0 | 0 | 0 | 2 | 0 | 0 | 0 | 0 | 0 |
| Otu02162 | 1 | 0 | 0 | 0 | 0 | 0 | 0 | 0 | 0 | 0 | 1 | 0 | 0 | 0 | 0 | 0 |
| Otu02163 | 1 | 0 | 0 | 0 | 1 | 0 | 0 | 0 | 0 | 0 | 0 | 0 | 0 | 0 | 0 | 0 |
| Otu02164 | 1 | 0 | 0 | 0 | 0 | 0 | 0 | 0 | 1 | 0 | 0 | 0 | 0 | 0 | 0 | 0 |
| Otu02165 | 1 | 0 | 0 | 1 | 0 | 0 | 0 | 0 | 0 | 0 | 0 | 0 | 0 | 0 | 0 | 0 |
| Otu02166 | 2 | 0 | 0 | 0 | 0 | 1 | 0 | 0 | 0 | 0 | 0 | 0 | 1 | 0 | 0 | 0 |
| Otu02167 | 1 | 0 | 1 | 0 | 0 | 0 | 0 | 0 | 0 | 0 | 0 | 0 | 0 | 0 | 0 | 0 |
| Otu02168 | 2 | 0 | 0 | 0 | 2 | 0 | 0 | 0 | 0 | 0 | 0 | 0 | 0 | 0 | 0 | 0 |
| Otu02169 | 2 | 0 | 0 | 0 | 0 | 0 | 0 | 0 | 0 | 2 | 0 | 0 | 0 | 0 | 0 | 0 |
| Otu02170 | 1 | 0 | 0 | 0 | 0 | 1 | 0 | 0 | 0 | 0 | 0 | 0 | 0 | 0 | 0 | 0 |
| Otu02171 | 1 | 0 | 0 | 0 | 0 | 0 | 0 | 0 | 0 | 0 | 0 | 0 | 0 | 0 | 1 | 0 |
| Otu02172 | 2 | 0 | 0 | 0 | 0 | 2 | 0 | 0 | 0 | 0 | 0 | 0 | 0 | 0 | 0 | 0 |
| Otu02175 | 2 | 0 | 0 | 0 | 0 | 0 | 1 | 0 | 0 | 0 | 1 | 0 | 0 | 0 | 0 | 0 |
| Otu02176 | 1 | 0 | 0 | 1 | 0 | 0 | 0 | 0 | 0 | 0 | 0 | 0 | 0 | 0 | 0 | 0 |
| Otu02177 | 2 | 0 | 0 | 0 | 0 | 0 | 2 | 0 | 0 | 0 | 0 | 0 | 0 | 0 | 0 | 0 |
| Otu02178 | 1 | 0 | 0 | 0 | 0 | 0 | 0 | 0 | 0 | 1 | 0 | 0 | 0 | 0 | 0 | 0 |
| Otu02179 | 1 | 0 | 0 | 0 | 0 | 0 | 0 | 0 | 1 | 0 | 0 | 0 | 0 | 0 | 0 | 0 |
| Otu02180 | 1 | 0 | 0 | 0 | 0 | 0 | 1 | 0 | 0 | 0 | 0 | 0 | 0 | 0 | 0 | 0 |
| Otu02181 | 1 | 0 | 0 | 0 | 0 | 1 | 0 | 0 | 0 | 0 | 0 | 0 | 0 | 0 | 0 | 0 |
| Otu02182 | 2 | 0 | 0 | 2 | 0 | 0 | 0 | 0 | 0 | 0 | 0 | 0 | 0 | 0 | 0 | 0 |
| Otu02185 | 2 | 0 | 0 | 0 | 0 | 0 | 0 | 1 | 0 | 0 | 1 | 0 | 0 | 0 | 0 | 0 |
| Otu02188 | 1 | 1 | 0 | 0 | 0 | 0 | 0 | 0 | 0 | 0 | 0 | 0 | 0 | 0 | 0 | 0 |
| Otu02189 | 2 | 0 | 0 | 0 | 0 | 0 | 0 | 0 | 0 | 2 | 0 | 0 | 0 | 0 | 0 | 0 |
| Otu02190 | 1 | 0 | 0 | 0 | 0 | 1 | 0 | 0 | 0 | 0 | 0 | 0 | 0 | 0 | 0 | 0 |
| Otu02191 | 1 | 0 | 0 | 0 | 0 | 0 | 0 | 0 | 0 | 1 | 0 | 0 | 0 | 0 | 0 | 0 |
| Otu02192 | 2 | 1 | 0 | 0 | 0 | 0 | 0 | 0 | 0 | 1 | 0 | 0 | 0 | 0 | 0 | 0 |
| Otu02193 | 2 | 0 | 0 | 0 | 0 | 0 | 0 | 2 | 0 | 0 | 0 | 0 | 0 | 0 | 0 | 0 |
| Otu02194 | 2 | 0 | 0 | 0 | 0 | 0 | 0 | 0 | 0 | 0 | 1 | 1 | 0 | 0 | 0 | 0 |
| Otu02195 | 1 | 0 | 0 | 0 | 0 | 0 | 0 | 1 | 0 | 0 | 0 | 0 | 0 | 0 | 0 | 0 |
| Otu02196 | 2 | 0 | 0 | 0 | 0 | 0 | 0 | 0 | 1 | 0 | 0 | 1 | 0 | 0 | 0 | 0 |
| Otu02197 | 1 | 0 | 0 | 1 | 0 | 0 | 0 | 0 | 0 | 0 | 0 | 0 | 0 | 0 | 0 | 0 |
| Otu02198 | 1 | 0 | 0 | 0 | 0 | 0 | 0 | 0 | 0 | 0 | 1 | 0 | 0 | 0 | 0 | 0 |
| Otu02199 | 1 | 0 | 0 | 0 | 0 | 0 | 0 | 1 | 0 | 0 | 0 | 0 | 0 | 0 | 0 | 0 |
| Otu02200 | 1 | 0 | 0 | 0 | 0 | 0 | 0 | 0 | 0 | 1 | 0 | 0 | 0 | 0 | 0 | 0 |
| Otu02202 | 2 | 0 | 0 | 2 | 0 | 0 | 0 | 0 | 0 | 0 | 0 | 0 | 0 | 0 | 0 | 0 |
| Otu02204 | 1 | 0 | 0 | 0 | 0 | 0 | 0 | 0 | 1 | 0 | 0 | 0 | 0 | 0 | 0 | 0 |
| Otu02205 | 2 | 0 | 0 | 0 | 0 | 0 | 0 | 2 | 0 | 0 | 0 | 0 | 0 | 0 | 0 | 0 |
| Otu02206 | 2 | 0 | 0 | 0 | 0 | 0 | 0 | 0 | 1 | 0 | 1 | 0 | 0 | 0 | 0 | 0 |
| Otu02207 | 2 | 0 | 0 | 0 | 0 | 2 | 0 | 0 | 0 | 0 | 0 | 0 | 0 | 0 | 0 | 0 |
| Otu02210 | 1 | 0 | 0 | 0 | 0 | 0 | 0 | 0 | 0 | 1 | 0 | 0 | 0 | 0 | 0 | 0 |

Supplementary 1  
 Taxonomy and Abundance of OTUs (see taxonomy of OTUs in Table S1A)  
 Normalized data, identification according to blast UNITEv7

|          |   |   |   |   |   |   |   |   |   |   |   |   |   |   |   |   |   |
|----------|---|---|---|---|---|---|---|---|---|---|---|---|---|---|---|---|---|
| Otu02211 | 1 | 0 | 0 | 0 | 0 | 1 | 0 | 0 | 0 | 0 | 0 | 0 | 0 | 0 | 0 | 0 | 0 |
| Otu02212 | 1 | 0 | 0 | 0 | 0 | 1 | 0 | 0 | 0 | 0 | 0 | 0 | 0 | 0 | 0 | 0 | 0 |
| Otu02213 | 2 | 0 | 0 | 0 | 0 | 0 | 0 | 0 | 0 | 0 | 2 | 0 | 0 | 0 | 0 | 0 | 0 |
| Otu02216 | 2 | 2 | 0 | 0 | 0 | 0 | 0 | 0 | 0 | 0 | 0 | 0 | 0 | 0 | 0 | 0 | 0 |
| Otu02217 | 1 | 0 | 0 | 0 | 0 | 0 | 0 | 1 | 0 | 0 | 0 | 0 | 0 | 0 | 0 | 0 | 0 |
| Otu02218 | 1 | 0 | 0 | 0 | 0 | 0 | 0 | 0 | 0 | 0 | 0 | 0 | 0 | 0 | 0 | 1 | 0 |
| Otu02220 | 1 | 1 | 0 | 0 | 0 | 0 | 0 | 0 | 0 | 0 | 0 | 0 | 0 | 0 | 0 | 0 | 0 |
| Otu02221 | 2 | 0 | 0 | 0 | 0 | 0 | 0 | 1 | 0 | 1 | 0 | 0 | 0 | 0 | 0 | 0 | 0 |
| Otu02222 | 1 | 0 | 0 | 0 | 0 | 0 | 0 | 0 | 0 | 0 | 0 | 0 | 0 | 0 | 0 | 1 | 0 |
| Otu02224 | 1 | 0 | 0 | 0 | 0 | 0 | 1 | 0 | 0 | 0 | 0 | 0 | 0 | 0 | 0 | 0 | 0 |
| Otu02226 | 1 | 0 | 0 | 0 | 0 | 1 | 0 | 0 | 0 | 0 | 0 | 0 | 0 | 0 | 0 | 0 | 0 |
| Otu02227 | 2 | 0 | 0 | 0 | 0 | 0 | 0 | 0 | 2 | 0 | 0 | 0 | 0 | 0 | 0 | 0 | 0 |
| Otu02228 | 2 | 0 | 0 | 0 | 0 | 0 | 0 | 0 | 0 | 1 | 0 | 1 | 0 | 0 | 0 | 0 | 0 |
| Otu02230 | 1 | 0 | 0 | 0 | 0 | 1 | 0 | 0 | 0 | 0 | 0 | 0 | 0 | 0 | 0 | 0 | 0 |
| Otu02232 | 0 | 0 | 0 | 0 | 0 | 0 | 0 | 0 | 0 | 0 | 0 | 0 | 0 | 0 | 0 | 0 | 0 |
| Otu02233 | 2 | 0 | 0 | 0 | 0 | 0 | 0 | 0 | 1 | 1 | 0 | 0 | 0 | 0 | 0 | 0 | 0 |
| Otu02234 | 2 | 0 | 0 | 0 | 0 | 0 | 0 | 0 | 0 | 1 | 1 | 0 | 0 | 0 | 0 | 0 | 0 |
| Otu02236 | 2 | 0 | 0 | 0 | 0 | 0 | 2 | 0 | 0 | 0 | 0 | 0 | 0 | 0 | 0 | 0 | 0 |
| Otu02237 | 2 | 0 | 0 | 0 | 0 | 0 | 2 | 0 | 0 | 0 | 0 | 0 | 0 | 0 | 0 | 0 | 0 |
| Otu02238 | 2 | 0 | 0 | 0 | 0 | 0 | 0 | 0 | 1 | 0 | 1 | 0 | 0 | 0 | 0 | 0 | 0 |
| Otu02240 | 2 | 0 | 0 | 0 | 0 | 0 | 0 | 0 | 2 | 0 | 0 | 0 | 0 | 0 | 0 | 0 | 0 |
| Otu02241 | 2 | 0 | 0 | 0 | 0 | 0 | 0 | 0 | 0 | 2 | 0 | 0 | 0 | 0 | 0 | 0 | 0 |
| Otu02242 | 2 | 0 | 0 | 0 | 0 | 0 | 2 | 0 | 0 | 0 | 0 | 0 | 0 | 0 | 0 | 0 | 0 |
| Otu02243 | 2 | 0 | 0 | 0 | 0 | 1 | 1 | 0 | 0 | 0 | 0 | 0 | 0 | 0 | 0 | 0 | 0 |
| Otu02244 | 2 | 0 | 0 | 0 | 0 | 0 | 0 | 0 | 0 | 0 | 2 | 0 | 0 | 0 | 0 | 0 | 0 |
| Otu02245 | 1 | 0 | 0 | 0 | 0 | 0 | 0 | 0 | 0 | 0 | 0 | 0 | 0 | 0 | 0 | 1 | 0 |
| Otu02246 | 1 | 0 | 0 | 0 | 0 | 0 | 0 | 0 | 0 | 0 | 0 | 0 | 0 | 0 | 0 | 1 | 0 |
| Otu02247 | 1 | 0 | 0 | 0 | 0 | 0 | 1 | 0 | 0 | 0 | 0 | 0 | 0 | 0 | 0 | 0 | 0 |
| Otu02248 | 2 | 0 | 0 | 0 | 0 | 0 | 0 | 1 | 0 | 0 | 1 | 0 | 0 | 0 | 0 | 0 | 0 |
| Otu02249 | 1 | 0 | 0 | 0 | 0 | 0 | 0 | 0 | 0 | 0 | 0 | 0 | 0 | 1 | 0 | 0 | 0 |
| Otu02253 | 2 | 0 | 0 | 0 | 0 | 0 | 0 | 0 | 2 | 0 | 0 | 0 | 0 | 0 | 0 | 0 | 0 |
| Otu02257 | 2 | 0 | 0 | 1 | 0 | 0 | 1 | 0 | 0 | 0 | 0 | 0 | 0 | 0 | 0 | 0 | 0 |
| Otu02258 | 2 | 0 | 0 | 0 | 0 | 0 | 0 | 1 | 0 | 0 | 0 | 1 | 0 | 0 | 0 | 0 | 0 |
| Otu02260 | 2 | 0 | 2 | 0 | 0 | 0 | 0 | 0 | 0 | 0 | 0 | 0 | 0 | 0 | 0 | 0 | 0 |
| Otu02261 | 1 | 0 | 0 | 0 | 0 | 0 | 0 | 1 | 0 | 0 | 0 | 0 | 0 | 0 | 0 | 0 | 0 |
| Otu02262 | 1 | 0 | 0 | 1 | 0 | 0 | 0 | 0 | 0 | 0 | 0 | 0 | 0 | 0 | 0 | 0 | 0 |
| Otu02263 | 2 | 0 | 1 | 0 | 0 | 0 | 0 | 1 | 0 | 0 | 0 | 0 | 0 | 0 | 0 | 0 | 0 |
| Otu02265 | 2 | 0 | 0 | 0 | 0 | 0 | 0 | 0 | 0 | 0 | 2 | 0 | 0 | 0 | 0 | 0 | 0 |
| Otu02266 | 2 | 0 | 0 | 0 | 0 | 0 | 0 | 0 | 0 | 0 | 2 | 0 | 0 | 0 | 0 | 0 | 0 |
| Otu02267 | 2 | 0 | 0 | 0 | 0 | 0 | 0 | 0 | 2 | 0 | 0 | 0 | 0 | 0 | 0 | 0 | 0 |
| Otu02268 | 2 | 0 | 0 | 0 | 0 | 0 | 1 | 0 | 0 | 0 | 0 | 0 | 0 | 0 | 0 | 1 | 0 |
| Otu02269 | 2 | 0 | 0 | 0 | 0 | 0 | 0 | 0 | 0 | 0 | 0 | 0 | 0 | 0 | 0 | 2 | 0 |
| Otu02270 | 2 | 0 | 0 | 0 | 0 | 0 | 1 | 0 | 1 | 0 | 0 | 0 | 0 | 0 | 0 | 0 | 0 |



Supplementary 1  
 Taxonomy and Abundance of OTUs (see taxonomy of OTUs in Table S1A)  
 Normalized data, identification according to blast UNITEv7

|          |   |   |   |   |   |   |   |   |   |   |   |   |   |   |   |   |   |
|----------|---|---|---|---|---|---|---|---|---|---|---|---|---|---|---|---|---|
| Otu02271 | 2 | 0 | 0 | 0 | 0 | 0 | 2 | 0 | 0 | 0 | 0 | 0 | 0 | 0 | 0 | 0 | 0 |
| Otu02272 | 2 | 0 | 0 | 0 | 0 | 0 | 1 | 0 | 0 | 1 | 0 | 0 | 0 | 0 | 0 | 0 | 0 |
| Otu02273 | 1 | 0 | 0 | 0 | 0 | 0 | 1 | 0 | 0 | 0 | 0 | 0 | 0 | 0 | 0 | 0 | 0 |
| Otu02274 | 2 | 0 | 0 | 0 | 0 | 0 | 0 | 0 | 1 | 0 | 0 | 1 | 0 | 0 | 0 | 0 | 0 |
| Otu02275 | 2 | 0 | 0 | 0 | 0 | 0 | 0 | 0 | 1 | 0 | 1 | 0 | 0 | 0 | 0 | 0 | 0 |
| Otu02277 | 2 | 0 | 0 | 0 | 0 | 0 | 0 | 0 | 0 | 1 | 1 | 0 | 0 | 0 | 0 | 0 | 0 |
| Otu02278 | 2 | 0 | 0 | 0 | 0 | 0 | 0 | 0 | 0 | 1 | 1 | 0 | 0 | 0 | 0 | 0 | 0 |
| Otu02280 | 1 | 0 | 0 | 0 | 0 | 0 | 0 | 0 | 0 | 0 | 0 | 1 | 0 | 0 | 0 | 0 | 0 |
| Otu02281 | 0 | 0 | 0 | 0 | 0 | 0 | 0 | 0 | 0 | 0 | 0 | 0 | 0 | 0 | 0 | 0 | 0 |
| Otu02283 | 1 | 0 | 0 | 0 | 1 | 0 | 0 | 0 | 0 | 0 | 0 | 0 | 0 | 0 | 0 | 0 | 0 |
| Otu02284 | 2 | 0 | 0 | 0 | 0 | 2 | 0 | 0 | 0 | 0 | 0 | 0 | 0 | 0 | 0 | 0 | 0 |
| Otu02285 | 2 | 0 | 0 | 2 | 0 | 0 | 0 | 0 | 0 | 0 | 0 | 0 | 0 | 0 | 0 | 0 | 0 |
| Otu02287 | 2 | 0 | 0 | 0 | 0 | 0 | 0 | 0 | 0 | 0 | 0 | 2 | 0 | 0 | 0 | 0 | 0 |
| Otu02288 | 1 | 0 | 0 | 0 | 1 | 0 | 0 | 0 | 0 | 0 | 0 | 0 | 0 | 0 | 0 | 0 | 0 |
| Otu02290 | 1 | 0 | 0 | 1 | 0 | 0 | 0 | 0 | 0 | 0 | 0 | 0 | 0 | 0 | 0 | 0 | 0 |
| Otu02291 | 2 | 0 | 0 | 0 | 0 | 0 | 0 | 0 | 1 | 0 | 1 | 0 | 0 | 0 | 0 | 0 | 0 |
| Otu02292 | 1 | 0 | 0 | 0 | 0 | 0 | 0 | 0 | 0 | 0 | 0 | 0 | 0 | 1 | 0 | 0 | 0 |
| Otu02294 | 2 | 0 | 0 | 0 | 0 | 0 | 1 | 0 | 1 | 0 | 0 | 0 | 0 | 0 | 0 | 0 | 0 |
| Otu02295 | 1 | 0 | 0 | 0 | 0 | 0 | 0 | 1 | 0 | 0 | 0 | 0 | 0 | 0 | 0 | 0 | 0 |
| Otu02296 | 1 | 0 | 0 | 0 | 0 | 1 | 0 | 0 | 0 | 0 | 0 | 0 | 0 | 0 | 0 | 0 | 0 |
| Otu02297 | 1 | 0 | 0 | 0 | 1 | 0 | 0 | 0 | 0 | 0 | 0 | 0 | 0 | 0 | 0 | 0 | 0 |
| Otu02298 | 2 | 0 | 0 | 0 | 0 | 0 | 1 | 1 | 0 | 0 | 0 | 0 | 0 | 0 | 0 | 0 | 0 |
| Otu02299 | 2 | 0 | 0 | 0 | 0 | 0 | 1 | 0 | 0 | 0 | 1 | 0 | 0 | 0 | 0 | 0 | 0 |
| Otu02300 | 2 | 0 | 0 | 0 | 0 | 0 | 0 | 0 | 0 | 1 | 1 | 0 | 0 | 0 | 0 | 0 | 0 |
| Otu02302 | 2 | 0 | 0 | 0 | 0 | 0 | 0 | 0 | 0 | 2 | 0 | 0 | 0 | 0 | 0 | 0 | 0 |
| Otu02303 | 2 | 0 | 0 | 0 | 0 | 0 | 2 | 0 | 0 | 0 | 0 | 0 | 0 | 0 | 0 | 0 | 0 |
| Otu02304 | 2 | 0 | 0 | 0 | 0 | 0 | 1 | 0 | 0 | 1 | 0 | 0 | 0 | 0 | 0 | 0 | 0 |
| Otu02305 | 1 | 0 | 0 | 0 | 0 | 0 | 0 | 0 | 1 | 0 | 0 | 0 | 0 | 0 | 0 | 0 | 0 |
| Otu02306 | 1 | 0 | 0 | 0 | 0 | 0 | 0 | 0 | 0 | 1 | 0 | 0 | 0 | 0 | 0 | 0 | 0 |
| Otu02308 | 1 | 0 | 0 | 0 | 0 | 1 | 0 | 0 | 0 | 0 | 0 | 0 | 0 | 0 | 0 | 0 | 0 |
| Otu02309 | 2 | 0 | 0 | 0 | 0 | 0 | 0 | 0 | 0 | 0 | 0 | 0 | 0 | 1 | 1 | 0 | 0 |
| Otu02310 | 1 | 0 | 0 | 0 | 0 | 0 | 0 | 0 | 0 | 0 | 0 | 0 | 1 | 0 | 0 | 0 | 0 |
| Otu02312 | 2 | 0 | 0 | 0 | 0 | 0 | 0 | 2 | 0 | 0 | 0 | 0 | 0 | 0 | 0 | 0 | 0 |
| Otu02313 | 2 | 0 | 0 | 2 | 0 | 0 | 0 | 0 | 0 | 0 | 0 | 0 | 0 | 0 | 0 | 0 | 0 |
| Otu02314 | 1 | 0 | 0 | 0 | 0 | 0 | 0 | 0 | 0 | 0 | 1 | 0 | 0 | 0 | 0 | 0 | 0 |
| Otu02315 | 2 | 0 | 0 | 0 | 0 | 0 | 0 | 1 | 1 | 0 | 0 | 0 | 0 | 0 | 0 | 0 | 0 |
| Otu02316 | 1 | 1 | 0 | 0 | 0 | 0 | 0 | 0 | 0 | 0 | 0 | 0 | 0 | 0 | 0 | 0 | 0 |
| Otu02317 | 1 | 0 | 0 | 0 | 0 | 0 | 0 | 0 | 0 | 0 | 0 | 0 | 0 | 0 | 0 | 1 | 0 |
| Otu02318 | 2 | 0 | 0 | 0 | 0 | 0 | 0 | 1 | 0 | 1 | 0 | 0 | 0 | 0 | 0 | 0 | 0 |
| Otu02319 | 1 | 0 | 0 | 0 | 0 | 1 | 0 | 0 | 0 | 0 | 0 | 0 | 0 | 0 | 0 | 0 | 0 |
| Otu02320 | 2 | 0 | 0 | 0 | 0 | 0 | 0 | 0 | 0 | 1 | 1 | 0 | 0 | 0 | 0 | 0 | 0 |
| Otu02321 | 1 | 0 | 0 | 0 | 0 | 0 | 0 | 0 | 0 | 0 | 0 | 0 | 1 | 0 | 0 | 0 | 0 |
| Otu02322 | 2 | 0 | 0 | 0 | 0 | 0 | 0 | 0 | 0 | 1 | 1 | 0 | 0 | 0 | 0 | 0 | 0 |

Supplementary 1  
 Taxonomy and Abundance of OTUs (see taxonomy of OTUs in Table S1A)  
 Normalized data, identification according to blast UNITEv7

|          |   |   |   |   |   |   |   |   |   |   |   |   |   |   |   |   |
|----------|---|---|---|---|---|---|---|---|---|---|---|---|---|---|---|---|
| Otu02323 | 2 | 0 | 0 | 0 | 1 | 0 | 0 | 0 | 0 | 0 | 1 | 0 | 0 | 0 | 0 | 0 |
| Otu02324 | 2 | 0 | 0 | 0 | 0 | 0 | 0 | 0 | 0 | 0 | 2 | 0 | 0 | 0 | 0 | 0 |
| Otu02325 | 2 | 0 | 0 | 2 | 0 | 0 | 0 | 0 | 0 | 0 | 0 | 0 | 0 | 0 | 0 | 0 |
| Otu02326 | 2 | 0 | 0 | 0 | 0 | 0 | 0 | 0 | 0 | 1 | 1 | 0 | 0 | 0 | 0 | 0 |
| Otu02327 | 1 | 0 | 0 | 0 | 0 | 0 | 0 | 1 | 0 | 0 | 0 | 0 | 0 | 0 | 0 | 0 |
| Otu02328 | 1 | 0 | 0 | 0 | 1 | 0 | 0 | 0 | 0 | 0 | 0 | 0 | 0 | 0 | 0 | 0 |
| Otu02329 | 1 | 0 | 0 | 0 | 1 | 0 | 0 | 0 | 0 | 0 | 0 | 0 | 0 | 0 | 0 | 0 |
| Otu02330 | 0 | 0 | 0 | 0 | 0 | 0 | 0 | 0 | 0 | 0 | 0 | 0 | 0 | 0 | 0 | 0 |
| Otu02331 | 1 | 0 | 0 | 0 | 0 | 1 | 0 | 0 | 0 | 0 | 0 | 0 | 0 | 0 | 0 | 0 |
| Otu02332 | 1 | 0 | 0 | 0 | 0 | 1 | 0 | 0 | 0 | 0 | 0 | 0 | 0 | 0 | 0 | 0 |
| Otu02334 | 2 | 0 | 0 | 0 | 0 | 0 | 2 | 0 | 0 | 0 | 0 | 0 | 0 | 0 | 0 | 0 |
| Otu02335 | 2 | 0 | 0 | 0 | 0 | 0 | 0 | 1 | 1 | 0 | 0 | 0 | 0 | 0 | 0 | 0 |
| Otu02336 | 1 | 0 | 0 | 0 | 0 | 0 | 0 | 1 | 0 | 0 | 0 | 0 | 0 | 0 | 0 | 0 |
| Otu02337 | 2 | 0 | 0 | 0 | 0 | 0 | 0 | 1 | 0 | 0 | 1 | 0 | 0 | 0 | 0 | 0 |
| Otu02338 | 2 | 0 | 0 | 1 | 1 | 0 | 0 | 0 | 0 | 0 | 0 | 0 | 0 | 0 | 0 | 0 |
| Otu02339 | 1 | 0 | 0 | 0 | 0 | 0 | 0 | 1 | 0 | 0 | 0 | 0 | 0 | 0 | 0 | 0 |
| Otu02340 | 2 | 0 | 0 | 0 | 0 | 0 | 0 | 0 | 0 | 2 | 0 | 0 | 0 | 0 | 0 | 0 |
| Otu02342 | 2 | 0 | 0 | 0 | 0 | 0 | 2 | 0 | 0 | 0 | 0 | 0 | 0 | 0 | 0 | 0 |
| Otu02343 | 1 | 0 | 0 | 0 | 0 | 1 | 0 | 0 | 0 | 0 | 0 | 0 | 0 | 0 | 0 | 0 |
| Otu02344 | 1 | 0 | 0 | 0 | 0 | 0 | 0 | 0 | 0 | 1 | 0 | 0 | 0 | 0 | 0 | 0 |
| Otu02346 | 2 | 0 | 0 | 0 | 0 | 0 | 0 | 0 | 0 | 0 | 0 | 0 | 0 | 0 | 2 | 0 |
| Otu02347 | 2 | 0 | 0 | 0 | 0 | 0 | 0 | 1 | 1 | 0 | 0 | 0 | 0 | 0 | 0 | 0 |
| Otu02348 | 2 | 0 | 0 | 0 | 0 | 0 | 0 | 0 | 1 | 1 | 0 | 0 | 0 | 0 | 0 | 0 |
| Otu02349 | 1 | 0 | 0 | 0 | 0 | 0 | 0 | 0 | 0 | 0 | 0 | 0 | 0 | 0 | 1 | 0 |
| Otu02350 | 2 | 0 | 0 | 0 | 0 | 0 | 2 | 0 | 0 | 0 | 0 | 0 | 0 | 0 | 0 | 0 |
| Otu02351 | 1 | 0 | 0 | 0 | 0 | 0 | 0 | 0 | 0 | 1 | 0 | 0 | 0 | 0 | 0 | 0 |
| Otu02356 | 1 | 0 | 0 | 0 | 0 | 0 | 0 | 0 | 0 | 1 | 0 | 0 | 0 | 0 | 0 | 0 |
| Otu02358 | 2 | 0 | 0 | 0 | 0 | 0 | 1 | 1 | 0 | 0 | 0 | 0 | 0 | 0 | 0 | 0 |
| Otu02362 | 2 | 0 | 0 | 0 | 0 | 0 | 1 | 0 | 0 | 1 | 0 | 0 | 0 | 0 | 0 | 0 |
| Otu02363 | 2 | 0 | 0 | 0 | 0 | 0 | 0 | 0 | 2 | 0 | 0 | 0 | 0 | 0 | 0 | 0 |
| Otu02366 | 1 | 0 | 0 | 0 | 0 | 0 | 0 | 1 | 0 | 0 | 0 | 0 | 0 | 0 | 0 | 0 |
| Otu02368 | 2 | 0 | 0 | 0 | 0 | 0 | 0 | 1 | 1 | 0 | 0 | 0 | 0 | 0 | 0 | 0 |
| Otu02369 | 0 | 0 | 0 | 0 | 0 | 0 | 0 | 0 | 0 | 0 | 0 | 0 | 0 | 0 | 0 | 0 |
| Otu02370 | 2 | 0 | 0 | 1 | 0 | 0 | 1 | 0 | 0 | 0 | 0 | 0 | 0 | 0 | 0 | 0 |
| Otu02371 | 1 | 0 | 0 | 0 | 0 | 0 | 1 | 0 | 0 | 0 | 0 | 0 | 0 | 0 | 0 | 0 |
| Otu02372 | 2 | 0 | 0 | 0 | 2 | 0 | 0 | 0 | 0 | 0 | 0 | 0 | 0 | 0 | 0 | 0 |
| Otu02373 | 2 | 0 | 0 | 0 | 0 | 0 | 1 | 1 | 0 | 0 | 0 | 0 | 0 | 0 | 0 | 0 |
| Otu02374 | 1 | 0 | 0 | 0 | 1 | 0 | 0 | 0 | 0 | 0 | 0 | 0 | 0 | 0 | 0 | 0 |
| Otu02375 | 2 | 0 | 0 | 1 | 0 | 1 | 0 | 0 | 0 | 0 | 0 | 0 | 0 | 0 | 0 | 0 |
| Otu02376 | 2 | 0 | 0 | 0 | 0 | 2 | 0 | 0 | 0 | 0 | 0 | 0 | 0 | 0 | 0 | 0 |
| Otu02378 | 1 | 0 | 0 | 0 | 0 | 1 | 0 | 0 | 0 | 0 | 0 | 0 | 0 | 0 | 0 | 0 |
| Otu02379 | 2 | 0 | 0 | 0 | 0 | 0 | 1 | 0 | 1 | 0 | 0 | 0 | 0 | 0 | 0 | 0 |
| Otu02380 | 0 | 0 | 0 | 0 | 0 | 0 | 0 | 0 | 0 | 0 | 0 | 0 | 0 | 0 | 0 | 0 |

Supplementary 1  
Taxonomy and Abundance of OTUs (see taxonomy of OTUs in Table S1A)  
Normalized data, identification according to blast UNITEv7

|          |   |   |   |   |   |   |   |   |   |   |   |   |   |   |   |   |
|----------|---|---|---|---|---|---|---|---|---|---|---|---|---|---|---|---|
| Otu02381 | 2 | 0 | 0 | 0 | 0 | 1 | 0 | 0 | 0 | 0 | 0 | 0 | 0 | 0 | 0 | 1 |
|----------|---|---|---|---|---|---|---|---|---|---|---|---|---|---|---|---|
