# Supplementary material for: Interactions between soil- and dead wood-inhabiting fungal communities during the decay of Norway spruce logs
Source: PubMed Central journal article supplement — ISME J. 2017 Apr 21;11(9):1964–74. doi: 10.1038/ismej.2017.57 (PMC5563949; doi:10.1038/ismej.2017.57), 2017-04-21
Supplement: ismej201757x4.pdf [file ismej201757x4.pdf]

## Supplementary Figure S2

A

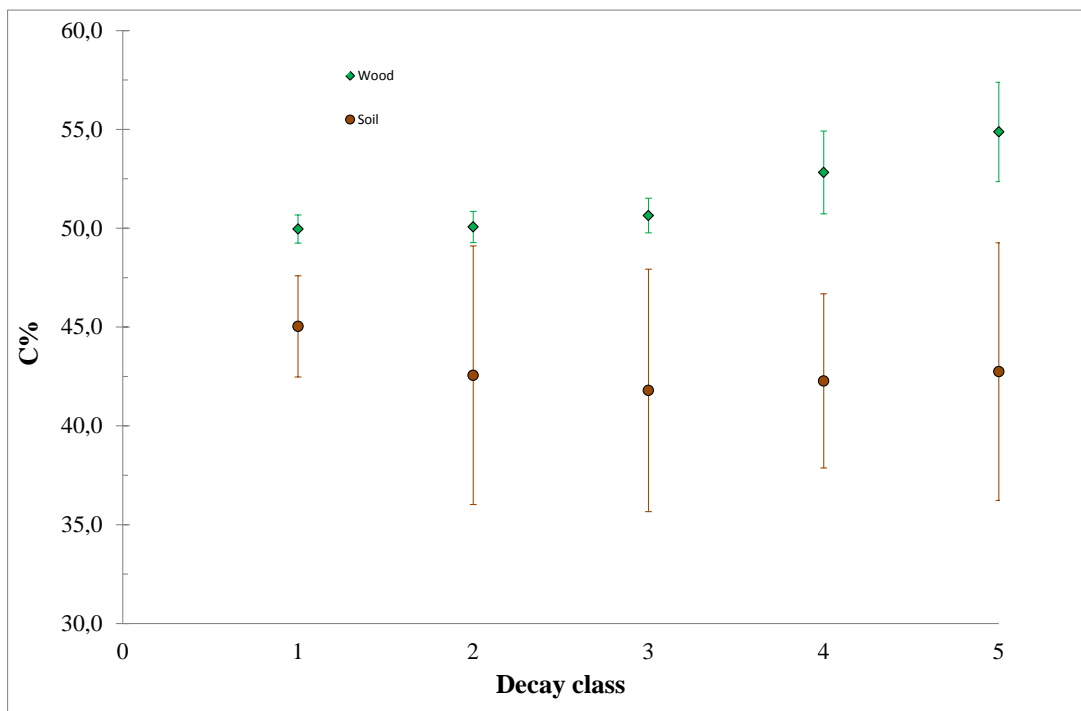

B

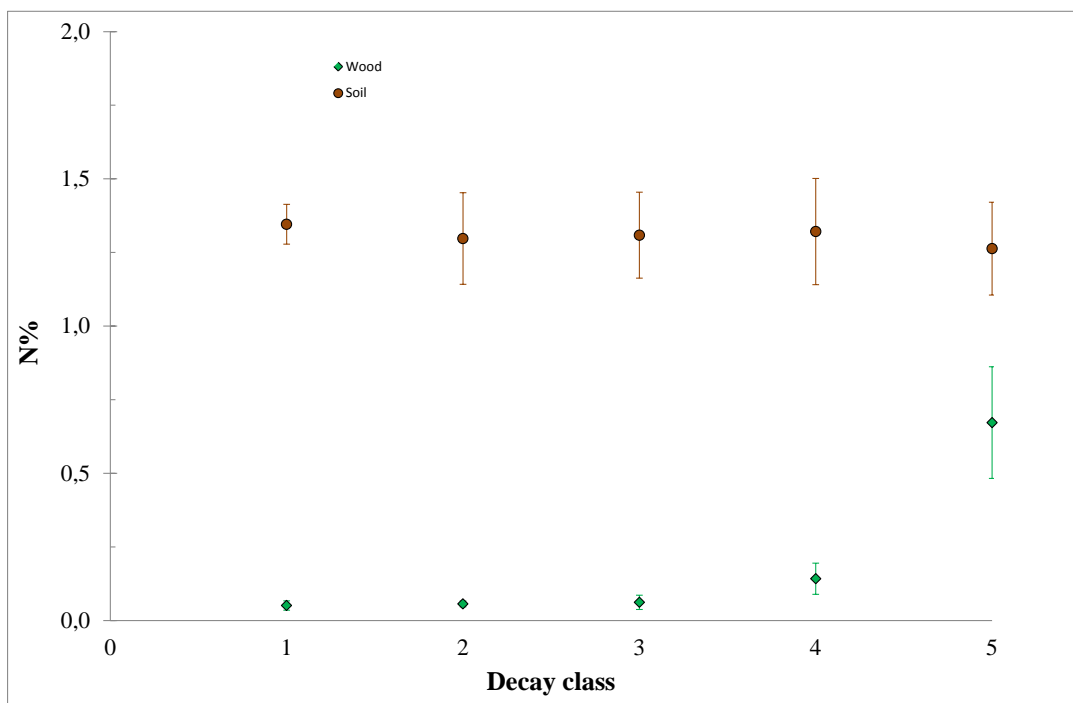

Figure S3. Dead wood (A) carbon (C%) and (B) nitrogen (N%) content according to decay class (1-5).
